# Supplementary material for: Basalt derived from highly refractory mantle sources during early Izu-Bonin-Mariana arc development
Source: Research Square preprint supplement (doi:10.21203/rs.3.rs-89845/v1), 2020-10-12
Supplement: Supplementary file 1 [file 5c0e88088e7f75d793f67089.xlsx]

## Sheet: Sheet1
Supplementary 1 Table 5. Major element compositions of plagioclase.
Element	Depth	SiO2	TiO2	Al2O3	FeO	MnO	MgO	CaO	Na2O	K2O	P2O5	Total	An (%)
E72R1W78-03	1475.48	53.2979	0.0963	29.054	1.0928	0.0039	0.5009	12.6023	4.7537	0.1277	0.2146	101.744	59.4316
E72R1W78-04	1475.48	52.5798	0.0615	29.7307	1.1312	0.0104	0.5456	13.1699	4.0001	0.0185	0.2583	101.506	64.5312
E72R1W78-05	1475.48	52.6049	0.0824	29.7444	1.1415	0.0212	0.5623	13.2395	3.9557	0.0266	0.2404	101.619	64.9064
E72R1W83-01	1475.53	52.8896	0.0656	28.6078	0.8826	0.0102	0.1568	12.4373	4.4494	0.0157	0.1874	99.7024	60.7022
E72R1W83-02	1475.53	48.4216	0.0313	31.08	0.5115	0.0142	0.276	15.6899	2.5921	0.0096	0.2383	98.8645	76.9844
E72R1W83-03	1475.53	52.1201	0.0543	29.3586	0.8813	0.0252	0.1398	13.2125	4.0197	0.0142	0.2068	100.032	64.4932
E72R1W83-04	1475.53	51.5259	0.0472	29.4791	0.7537	0.0231	0.176	13.6551	3.8846	0.019	0.2042	99.7679	66.0152
E72R1W83-05	1475.53	50.6598	0.0316	29.3836	0.7952	ND	0.1467	13.8255	3.8426	0.0155	0.2372	98.9377	66.5354
E72R1W83-08	1475.53	52.3376	0.0361	29.283	0.9297	0.0009	0.1178	13.1245	4.1587	0.0139	0.2524	100.255	63.5563
E72R1W83-09	1475.53	53.3961	0.083	27.6297	0.9466	0.0141	0.0938	11.7341	4.8899	0.0039	0.1955	98.9867	57.0087
E72R1W83-10	1475.53	51.2461	0.0477	29.0748	0.8157	ND	0.161	13.5183	3.8756	0.009	0.1985	98.9467	65.8412
E72R1W83-12	1475.53	53.5019	0.0665	28.3633	0.8593	0.0005	0.1139	12.0801	4.7729	0.0104	0.245	100.014	58.3094
E72R1W83-13	1475.53	48.6084	0.032	31.0449	0.5854	ND	0.2352	15.7401	2.5268	ND	0.2901	99.0629	77.4891
E72R1W83-14	1475.53	52.5422	0.0774	28.588	0.9145	0.0238	0.0892	12.5402	4.5784	0.03	0.2124	99.5961	60.2159
E72R1W83-15	1475.53	52.9518	0.0477	28.5883	0.8577	0.0002	0.1357	12.3562	4.4934	0.0218	0.2281	99.6809	60.3107
E72R1W83-16	1475.53	53.1225	0.0617	28.1791	0.9201	0.0139	0.1196	12.232	4.7313	0.0253	0.245	99.6505	58.825
E72R1W83-17	1475.53	47.4921	0.0489	32.1139	0.4427	0.0183	0.2445	16.4434	2.1146	0.0286	0.2661	99.2131	81.1217
E73R1W77-01	1485.17	47.3976	0.0256	32.0823	0.6969	0.0169	0.1925	16.5627	1.7869	0.0103	0.3556	99.1273	83.6655
E73R1W77-02	1485.17	48.3702	0.0208	32.0547	0.4271	0	0.2334	16.2774	1.9772	0.0019	0.3234	99.6861	81.9797
E73R1W77-03	1485.17	49.1049	0.0242	32.0323	0.5527	0.0066	0.2806	15.9948	2.2198	0.0055	0.3074	100.529	79.9268
E73R1W77-04	1485.17	54.0514	0.067	29.2765	0.8875	0.0015	0.1407	12.6291	4.1257	0.017	0.2543	101.451	62.8468
E73R1W77-05	1485.17	49.9569	0.0545	31.5909	0.5073	0.0017	0.2776	15.7615	2.3206	0.0146	0.3098	100.795	78.9618
E73R1W77-06	1485.17	50.7664	0.0403	30.8441	0.6469	0.004	0.2609	15.2429	2.6707	0.01	0.2965	100.783	75.9265
E73R1W77-07	1485.17	55.934	0.0601	27.7436	0.9847	0.0113	0.0642	11.1766	4.873	0.0396	0.2533	101.14	55.8972
E73R1W77-08	1485.17	47.9317	0.0137	31.7893	0.486	0.0108	0.226	16.2242	1.9151	0.0036	0.3333	98.9337	82.3989
E73R1W77-09	1485.17	53.1876	0.0472	30.0108	0.7892	0.0101	0.1515	13.3621	3.788	0.0257	0.2607	101.633	66.0935
E73R2W61-01	1486.2	46.746	ND	32.986	0.502	0.014	0.264	17.756	1.402	0.012	0.01	99.692	87.4977
E73R2W61-02	1486.2	48.918	ND	31.068	0.495	0.02	0.27	16.195	2.227	0.021	ND	99.214	80.074
E73R2W61-03	1486.2	50.286	0.059	30.557	0.7	0.002	0.285	15.419	2.634	0.02	0.011	99.973	76.3863
E73R2W61-04	1486.2	49.56	0.064	31.194	0.692	ND	0.263	15.89	2.212	0.011	ND	99.886	79.8778
E73R2W61-05	1486.2	48.493	ND	31.587	0.577	ND	0.272	16.532	2.074	0.012	ND	99.547	81.498
E73R2W61-06	1486.2	48.713	0.021	31.161	0.426	0.007	0.382	16.541	2.107	0.027	ND	99.385	81.2671
E73R2W61-07	1486.2	48.307	0.039	31.252	0.487	ND	0.266	16.273	1.932	0.213	ND	98.769	82.3149
E73R2W61-08	1486.2	47.9694	0.0306	32.8844	0.4503	0.0187	0.3284	16.0849	1.7892	0.1151	0.2962	99.9672	83.2436
E73R2W61-09	1486.2	48.6076	0.0283	32.0048	0.5383	0.0029	0.3704	15.7981	1.9783	0.034	0.3278	99.6905	81.5256
E74R2W15-01	1495.63	47.29	ND	32.447	0.35	ND	0.212	17.772	1.504	ND	ND	99.575	86.7194
E74R2W15-02	1495.63	46.911	0.001	32.15	0.411	0.025	0.212	17.686	1.526	ND	0.025	98.947	86.4947
E74R2W15-03	1495.63	46.875	0.058	32.442	0.501	0.027	0.19	17.671	1.455	0.002	0.029	99.25	87.0321
E74R2W15-04	1495.63	49.958	0.036	30.339	0.584	0.023	0.212	15.196	2.592	0.002	0.022	98.964	76.4135
E74R2W15-05	1495.63	51.182	0.02	29.681	0.708	0.005	0.238	14.263	3.228	0.012	0.005	99.342	70.9444
E74R2W15-06	1495.63	50.271	0.061	30.142	0.649	0.048	0.231	15.056	2.824	0.012	ND	99.294	74.6589
E74R2W15-07	1495.63	50.034	0.064	30.123	0.615	0.042	0.225	14.983	2.836	0.018	ND	98.94	74.4863
E74R2W15-08	1495.63	50.295	0.054	29.525	0.682	0.042	0.242	14.778	2.883	0.02	ND	98.521	73.9079
E74R2W15-09	1495.63	50.914	0.034	29.634	0.664	0.033	0.243	14.729	3.103	0.009	ND	99.363	72.3988
E74R2W15-10	1495.63	52.882	0.054	28.273	0.901	0.052	0.185	12.988	3.899	0.013	0.016	99.263	64.7983
E74R2W15-11	1495.63	51.968	0.013	28.785	0.741	0.021	0.205	13.717	3.424	0.017	ND	98.891	68.8841
E74R2W15-12	1495.63	50.821	0.034	29.826	0.629	0.02	0.256	14.712	2.927	0.004	0.029	99.258	73.5277
E74R2W15-13	1495.63	52.436	0.012	28.692	0.782	0.027	0.212	13.408	3.831	0.015	ND	99.415	65.9172
E74R2W15-14	1495.63	51.656	0.017	28.913	0.825	ND	0.209	13.85	3.398	0.004	ND	98.872	69.2531
E75R1W56-01	1504.06	51.051	0.091	29.164	0.608	ND	0.279	14.252	3.183	0.015	0.043	98.686	71.2171
E75R1W56-02	1504.06	51.695	0.066	28.566	0.768	0.025	0.275	13.808	3.666	0.013	0.005	98.887	67.5469
E75R1W56-03	1504.06	51.249	0.025	29.516	0.633	ND	0.273	14.424	3.189	0.01	ND	99.319	71.424
E75R1W56-05	1504.06	52.817	0.052	28.447	0.851	0.074	0.244	13.158	3.999	0.011	0.021	99.674	64.5168
E76R2W23-01	1508.44	53.212	0.078	27.97	1.031	ND	0.244	12.59	4.118	0.014	0.039	99.296	62.818
E76R2W23-02	1508.44	50.507	0.02	30.141	0.504	0.006	0.235	15.17	2.732	0.012	0.01	99.337	75.4205
E76R2W23-03	1508.44	51.179	0.036	29.474	0.627	ND	0.288	14.515	2.923	0.006	0.017	99.065	73.2913
E76R2W23-04	1508.44	50.888	0.073	29.744	0.662	0.027	0.306	14.68	2.971	0.011	ND	99.362	73.1936
E76R2W23-05	1508.44	50.865	0.026	29.81	0.7	ND	0.331	14.903	2.867	0.013	0.031	99.546	74.1768
E76R2W23-06	1508.44	48.875	ND	30.678	0.694	ND	0.317	15.651	2.279	0.004	0.039	98.537	79.1448
E76R2W23-07	1508.44	51.205	0.049	29.485	0.626	0.026	0.273	14.518	2.895	0.014	0.003	99.094	73.4833
E76R2W23-08	1508.44	54.274	0.043	27.662	0.944	0.027	0.156	12.095	4.617	0.02	0.004	99.842	59.1441
E76R2W23-09	1508.44	49.267	0.018	30.717	0.585	ND	0.238	15.65	2.5	0.021	ND	98.996	77.5748
E76R2W23-10	1508.44	51.464	0.009	29.311	0.583	0.048	0.277	14.384	3.214	0.013	0.015	99.318	71.2074
E77R2W32-01	1512.46	48.0647	0.0161	33.1181	0.3633	ND	0.2371	16.8621	1.761	0.0116	0.3298	100.764	84.1051
E77R2W32-02	1512.46	47.3046	0.013	34.4158	0.3801	ND	0.1792	16.8182	1.6113	0.0246	0.2775	101.024	85.2243
E77R2W32-03	1512.46	47.4706	0.0183	33.4557	0.3053	0	0.2058	16.8217	1.6187	0.0045	0.3516	100.252	85.1691
E77R2W32-04	1512.46	46.3899	0.007	33.7779	0.4239	0.0008	0.1419	17.5863	1.3301	0.0106	0.2432	99.9116	87.961
E77R2W32-05	1512.46	49.4062	0.0292	32.498	0.4888	0.0044	0.2199	15.2791	2.505	0.0042	0.2992	100.734	77.1196
E77R2W32-06	1512.46	46.0851	0.0168	34.0522	0.4337	0.0075	0.1718	17.409	1.3381	ND	0.3054	99.8196	87.7892
E77R2W32-07	1512.46	48.1576	ND	33.6979	0.4427	0.001	0.1544	16.3896	1.8113	0.011	0.3106	100.976	83.334
E77R2W32-08	1512.46	48.2908	0.0184	33.5779	0.3809	0.0055	0.1795	16.4541	1.7933	0.0178	0.2867	101.005	83.5263
E77R2W32-09	1512.46	52.5724	0.0531	30.0214	0.8243	0.0062	0.1357	13.2293	3.7424	0.0085	0.2875	100.881	66.1411
E78R3W21-02	1518.43	45.591	ND	33.883	0.295	ND	0.139	18.645	0.873	0.004	0.002	99.432	92.1888
E78R3W21-03	1518.43	45.53	0.056	33.594	0.335	ND	0.171	18.471	0.952	ND	ND	99.109	91.4688
Supplementary 1 Table 5. continued.
Element	Depth	SiO2	TiO2	Al2O3	FeO	MnO	MgO	CaO	Na2O	K2O	P2O5	Total	An (%)
E78R3W21-04	1518.43	46.007	0.01	33.696	0.392	0.028	0.154	18.577	0.989	0.011	0.055	99.919	91.2125
E78R3W21-05	1518.43	45.3166	0.0094	33.458	0.4056	0.0054	0.1473	17.8289	1.0328	ND	0.3431	98.5471	90.5118
E78R3W21-06	1518.43	46.0995	0.0211	32.4577	0.3983	0.0023	0.1808	17.7781	1.1456	0.0132	0.3552	98.4518	89.5568
E78R3W21-07	1518.43	46.9274	ND	33.1427	0.379	0.0022	0.1429	17.299	1.287	0.0074	0.3692	99.5568	88.1343
E78R3W21-08	1518.43	46.1051	0.0041	32.787	0.4062	ND	0.1602	17.7899	1.1823	0.0158	0.3318	98.7824	89.2645
E78R3W21-09	1518.43	47.3242	ND	32.9422	0.3743	0.0072	0.184	17.3654	1.334	0.012	0.4016	99.9449	87.7952
E78R3W21-10	1518.43	46.8319	0.0156	32.952	0.4067	0.0112	0.1883	17.4807	1.2692	0.0045	0.3392	99.4993	88.3869
E78R3W21-12	1518.43	48.7149	0.0292	31.6093	0.4886	0.0026	0.2455	16.2482	1.9727	0.011	0.3106	99.6326	81.9869
E78R4W48-01	1520.09	50.8604	0.0475	29.3533	0.7082	0.0023	0.2059	14.126	3.2534	0.0023	0.3019	98.8612	70.5826
E78R4W48-02	1520.09	49.5817	0.0265	30.6539	0.5683	0.0158	0.2167	15.1411	2.6185	0.0117	0.3433	99.1775	76.164
E78R4W48-03	1520.09	50.6991	0.0185	29.4369	0.7338	0.0166	0.2133	14.5066	2.9921	0.0036	0.2936	98.9141	72.82
E78R4W48-04	1520.09	52.9964	0.0463	29.2554	0.8391	0.0036	0.2045	13.709	3.4261	0.0111	0.2632	100.755	68.8585
E78R4W48-05	1520.09	51.218	0.0518	30.6546	0.745	0.0064	0.192	14.6265	2.9011	0.0059	0.2947	100.696	73.5872
E78R4W48-06	1520.09	49.6116	0.0537	30.7091	0.7102	0.0043	0.2037	15.0549	2.6036	ND	0.3181	99.2692	76.1639
E79R2W38-01	1525.84	49.21	ND	30.9	0.596	ND	0.216	15.649	2.617	ND	0.027	99.215	76.768
E79R2W38-02	1525.84	49.077	ND	30.411	0.661	ND	0.193	15.597	2.574	0.004	0.044	98.561	77.0033
E79R2W38-03	1525.84	51.594	ND	28.875	0.819	0.047	0.212	14.006	3.633	0.021	0.007	99.214	68.0551
E79R2W38-04	1525.84	48.242	ND	31.297	0.482	ND	0.219	16.075	2.181	0.012	ND	98.508	80.2875
E79R2W38-05	1525.84	50.128	ND	29.971	0.728	0.009	0.213	14.98	2.938	0.007	ND	98.974	73.8052
E79R2W38-06	1525.84	49.01	0.023	30.948	0.553	0.009	0.241	15.872	2.374	0.008	ND	99.038	78.6987
E79R2W38-07	1525.84	48.696	0.006	31.092	0.477	0.058	0.204	15.99	2.275	ND	0.013	98.811	79.525
E79R2W38-08	1525.84	50.199	0.127	30.038	0.702	ND	0.239	14.739	3.101	0.007	ND	99.152	72.4252
E79R2W38-09	1525.84	52.993	0.035	28.193	0.963	0.022	0.141	12.562	4.107	0.019	0.008	99.043	62.8284
E79R2W38-10	1525.84	48.54	ND	31.39	0.32	ND	0.195	16.376	2.114	0.002	ND	98.937	81.0631
E79R2W38-11	1525.84	49.725	ND	30.557	0.518	0.061	0.254	15.502	2.589	0.006	0.018	99.23	76.7915
E79R2W38-12	1525.84	53.403	0.081	27.836	0.902	0.02	0.13	12.554	4.352	0.027	0.009	99.314	61.4504
E79R2W38-13	1525.84	51.065	ND	29.116	0.674	0.015	0.208	13.901	3.451	0.012	0.009	98.451	69.0012
E79R2W38-14	1525.84	48.799	ND	30.814	0.559	0.009	0.267	15.687	2.379	0.004	0.001	98.519	78.466
E79R2W38-15	1525.84	49.962	0.071	30.792	0.466	0.006	0.244	15.554	2.712	0.002	ND	99.809	76.0152
E80R1W37-05	1533.97	50.306	ND	29.824	0.637	0.011	0.223	14.633	3.092	0.01	0.018	98.754	72.339
E80R1W37-06	1533.97	51.192	0.155	29.109	0.741	0.05	0.267	14.162	3.388	0.025	0.037	99.126	69.7876
E80R1W37-08	1533.97	50.973	0.128	29.15	0.756	0.051	0.247	14.304	3.268	0.019	0.032	98.928	70.7493
E80R1W37-10	1533.97	52.798	0.063	28.317	0.734	ND	0.175	12.931	4.04	0.022	ND	99.08	63.8824
E80R1W93-01	1533.97	54.554	0.0429	28.378	0.9331	0.0221	0.0903	12.0725	4.3898	0.0114	0.2318	100.726	60.3131
E80R1W93-02	1533.97	52.6221	0.044	28.2489	0.8584	0.0175	0.1371	12.5657	4.1029	0.0173	0.2144	98.8283	62.8586
E80R1W93-04	1533.97	51.7147	0.0339	29.747	0.6464	0.0124	0.2446	14.1345	3.2362	0.0198	0.2782	100.068	70.705
E80R1W93-07	1533.97	57.3789	0.0884	27.3013	1.0385	0.0064	0.0752	10.3652	5.392	0.0216	0.2319	101.899	51.51
E80R1W93-08	1533.97	56.2328	0.0552	27.3824	0.931	0.0118	0.1	10.5891	5.0688	0.0242	0.2186	100.614	53.5839
E81R1W54-01	1543.44	52.328	0.01	29.396	0.674	ND	0.281	13.782	3.605	0.016	0.019	100.111	67.8726
E81R1W54-02	1543.44	51.888	0.036	29.712	0.839	0.038	0.323	14.34	3.336	0.027	ND	100.539	70.3738
E81R1W54-03	1543.44	51.97	ND	29.236	0.839	0.085	0.248	13.914	3.514	0.007	ND	99.813	68.6331
E81R1W54-04	1543.44	55.137	0.082	27.291	0.979	ND	0.122	11.247	4.909	0.018	0.003	99.788	55.8706
E81R1W54-05	1543.44	52.359	0.089	29.116	0.932	ND	0.258	13.703	3.758	0.01	0.006	100.231	66.8323
E81R1W54-06	1543.44	51.497	0.016	29.431	0.834	ND	0.305	14.185	3.227	0.012	0.033	99.54	70.8376
E81R1W54-07	1543.44	51.791	0.031	29.432	0.65	0.014	0.273	14.204	3.381	0.014	ND	99.79	69.8935
E81R1W54-08	1543.44	53.5	0.035	28.248	0.957	ND	0.205	12.738	4.213	0.005	0.026	99.927	62.5579
E81R1W54-09	1543.44	52.037	0.055	29.018	0.894	ND	0.347	14.094	3.365	0.002	ND	99.812	69.8297
E81R1W54-10	1543.44	52.083	0.084	28.951	1.096	0.001	0.372	14.07	3.442	0.006	0.001	100.106	69.3147
E81R1W54-11	1543.44	52.842	ND	28.759	0.839	0.007	0.218	13.143	3.975	0.004	ND	99.787	64.6284
E81R1W54-12	1543.44	53.054	0.065	28.686	0.992	0.001	0.214	13.284	3.635	0.012	ND	99.943	66.8815
E81R1W54-13	1543.44	52.178	0.028	29.527	0.927	0.056	0.236	13.963	3.504	0.019	0.003	100.441	68.7699
E81R1W54-14	1543.44	52.7	0.037	28.992	0.943	ND	0.212	13.395	3.894	0.014	ND	100.187	65.5279
E82R1W23-01	1552.23	51.533	0.038	30.035	0.876	0.01	0.263	14.318	3.247	0.013	0.004	100.337	70.9028
E82R1W23-02	1552.23	54.544	0.066	27.457	1.131	0.063	0.14	11.516	4.952	0.03	ND	99.899	56.238
E82R1W23-03	1552.23	52.436	0.019	29.385	0.848	0.054	0.324	13.847	3.586	0.014	ND	100.513	68.09
E82R1W23-04	1552.23	52.86	0.049	28.688	1.011	0.038	0.266	13.4	3.826	0.014	ND	100.152	65.9331
E82R2W91-01	1554.25	52.246	ND	29.453	0.908	ND	0.333	14.124	3.271	0.012	0.014	100.361	70.4675
E82R2W91-02	1554.25	53.49	0.054	28.094	1.103	ND	0.24	12.489	4.369	0.017	ND	99.856	61.2348
E82R2W91-03	1554.25	52.021	0.039	29.476	0.777	ND	0.264	14.074	3.511	0.013	0.032	100.207	68.897
E82R2W91-04	1554.25	51.21	0.005	30.356	0.602	0.034	0.3	14.554	3.111	0.001	0.026	100.199	72.1075
E82R2W91-05	1554.25	51.005	0.024	30.307	0.724	ND	0.309	14.839	2.888	ND	0.01	100.106	73.9539
E82R3W58-01	1555.28	52.465	0.031	29.058	1.159	0.002	0.331	13.596	3.573	0.021	ND	100.236	67.7706
E82R3W58-02	1555.28	54.506	0.074	27.701	1.331	0.068	0.117	11.703	5.022	0.033	ND	100.555	56.2889
E82R3W58-03	1555.28	52.513	0.033	28.995	1.052	0.053	0.316	13.547	3.594	0.028	ND	100.131	67.5634
E82R3W58-04	1555.28	52.741	0.007	28.98	0.975	ND	0.323	13.47	3.749	0.056	0.043	100.344	66.5045
E82R3W58-05	1555.28	51.492	0.031	29.748	0.762	0.037	0.329	14.469	3.155	0.011	ND	100.034	71.7055
E82R3W58-07	1555.28	51.529	0.101	29.585	0.841	0.073	0.348	14.284	3.191	0.027	0.002	99.981	71.2117
E83R1W121-01	1562.61	51.351	ND	29.85	0.687	0.025	0.289	14.779	3.103	0.003	0.011	100.098	72.4664
E83R1W121-02	1562.61	52.367	0.031	29.09	0.735	ND	0.29	13.757	3.592	0.016	0.013	99.891	67.9117
E83R1W121-03	1562.61	52.916	ND	28.277	0.912	0.024	0.242	13.173	3.751	0.28	0.032	99.607	65.994
E83R1W121-04	1562.61	52.007	0.031	28.545	0.962	0.09	0.283	13.506	3.634	0.021	ND	99.079	67.2537
E83R1W121-05	1562.61	51.608	0.084	29.016	0.979	0.02	0.309	13.914	3.473	0.011	ND	99.414	68.8852
E83R1W121-06	1562.61	54.327	0.01	27.327	1.037	ND	0.131	11.686	4.638	0.022	ND	99.178	58.2
Supplementary 1 Table 5. continued.
Element	Depth	SiO2	TiO2	Al2O3	FeO	MnO	MgO	CaO	Na2O	K2O	P2O5	Total	An (%)
E83R1W121-07	1562.61	52.686	0.058	29.001	0.933	0.033	0.285	13.351	3.682	0.011	0.02	100.06	66.7082
E83R1W121-08	1562.61	50.934	0.128	28.848	0.921	0.057	0.326	14.152	3.338	0.063	0.013	98.78	70.0853
E83R1W121-09	1562.61	52.058	0.064	28.932	0.709	ND	0.284	13.637	3.488	0.072	0.035	99.279	68.3594
E83R1W121-10	1562.61	52.634	0.006	28.02	0.91	0.046	0.196	12.814	4.203	0.025	0.023	98.877	62.7527
E83R1W121-11	1562.61	51.533	0.132	29.141	0.927	0.061	0.304	13.922	3.377	0.009	ND	99.406	69.495
E83R1W121-12	1562.61	52.508	0.084	27.986	0.987	0.032	0.205	12.788	4.091	0.02	0.017	98.718	63.3346
E83R1W121-13	1562.61	53.326	ND	28.147	1.18	0.002	0.156	12.665	4.324	0.227	0.036	100.063	61.8112
E84R1W34-01	1571.44	55.372	0.049	27.125	1.163	0.021	0.107	10.913	5.252	0.027	ND	100.029	53.4502
E85R1W134-01	1580.44	47.2228	0.0031	32.5455	0.5614	0.0108	0.1428	16.6186	1.8153	0.0053	0.3625	99.2881	83.4954
E85R1W134-02	1580.44	47.6142	0.019	32.0475	0.5828	0.0134	0.1957	16.49	1.7889	0.0046	0.3283	99.0844	83.59
E85R1W134-03	1580.44	47.0986	0.0257	32.4096	0.5745	0.0027	0.184	16.5579	1.7321	0.0145	0.3232	98.9228	84.0829
E85R1W134-04	1580.44	47.0543	0.0457	32.4887	0.5513	0.0032	0.1676	16.6424	1.6658	0.0093	0.3657	98.994	84.6645
E85R1W134-05	1580.44	48.0322	0.0223	31.813	0.556	0.0083	0.1815	15.9532	2.1217	0.0084	0.3166	99.0132	80.6015
E85R1W134-06	1580.44	48.7755	0.0412	30.592	0.6515	0.0144	0.3433	15.4406	2.4893	ND	0.3271	98.6749	77.4147
E85R1W134-08	1580.44	48.598	0.0341	30.8498	0.6051	0.0037	0.3413	15.7631	2.3129	0.0068	0.3161	98.8309	79.0186
E85R1W134-09	1580.44	49.283	0.0134	30.5375	0.6404	0.0164	0.3564	15.4513	2.5411	0.0195	0.312	99.171	77.0648
E85R1W134-10	1580.44	48.2331	0.0208	31.1971	0.5777	0.0056	0.314	15.8764	2.1716	0.0136	0.3014	98.7113	80.1588
E85R1W134-11	1580.44	49.7086	0.0244	30.4817	0.6884	0.0092	0.3798	15.1021	2.6006	0.0016	0.3046	99.301	76.2416
E85R1W134-12	1580.44	50.8886	0.0652	28.8979	1.0514	0.008	0.4452	13.8435	3.2454	0.1191	0.2665	98.8308	70.2129
E85R1W134-13	1580.44	46.3325	0.0143	33.3493	0.4428	ND	0.1831	17.3824	1.4269	0.0126	0.3264	99.4703	87.0663
E85R1W134-14	1580.44	46.555	0.0347	33.5875	0.4491	0.0016	0.1655	17.3186	1.4676	0.0019	0.3377	99.9192	86.704
E86R2W16-01	1586.42	49.459	0.026	31.135	0.452	ND	0.321	16.067	2.281	0.004	ND	99.745	79.5603
E86R2W16-02	1586.42	50.26	ND	30.84	0.633	0.011	0.366	15.621	2.385	0.01	0.025	100.151	78.352
E86R2W16-03	1586.42	50.723	0.042	30.15	0.475	0.036	0.345	14.682	2.713	0.28	ND	99.446	74.9406
E86R2W16-04	1586.42	47.228	0.023	33.023	0.441	0.022	0.208	17.428	1.468	0.013	ND	99.854	86.7733
E86R2W16-05	1586.42	49.178	0.018	31.415	0.504	0.022	0.307	16.16	2.093	0.009	0.004	99.71	81.0125
E86R2W16-06	1586.42	50.203	0.039	30.777	0.52	0.041	0.338	15.357	2.656	0.009	0.015	99.955	76.1629
E86R2W16-07	1586.42	49.766	0.012	31.172	0.625	ND	0.342	15.965	2.348	ND	0.027	100.257	78.9799
E86R2W16-08	1586.42	50.36	0.028	30.645	0.69	ND	0.41	15.398	2.67	0.001	ND	100.202	76.1158
E86R2W16-09	1586.42	50.75	0.045	30.298	0.842	ND	0.339	15.05	2.951	0.013	0.006	100.294	73.81
E86R2W16-10	1586.42	47.603	ND	32.631	0.514	ND	0.235	17.005	1.552	ND	0.021	99.561	85.8251
E87R1W86-01	1594.86	49.4363	0.0422	31.1609	0.5293	0.0001	0.3372	15.5471	2.4333	0.0113	0.2984	99.7961	77.9285
E87R1W86-02	1594.86	52.2579	0.0362	29.5791	0.906	0.0066	0.2219	13.2769	3.649	0.0117	0.2394	100.185	66.7845
E87R1W86-04	1594.86	55.4377	0.0723	28.3761	1.1232	0.0146	0.1068	11.5545	4.6757	0.011	0.2034	101.575	57.727
E87R1W86-05	1594.86	50.6915	0.0223	31.4339	0.5563	0.0089	0.3548	15.2565	2.618	ND	0.2994	101.242	76.305
E87R1W86-06	1594.86	54.5788	0.0679	28.5803	1.0001	0.0027	0.1292	11.8247	4.5177	0.0055	0.2407	100.948	59.1234
E87R1W86-08	1594.86	50.7901	0.0227	30.3916	0.7404	0.0072	0.3037	14.3846	2.9374	0.0113	0.3132	99.9022	73.0176
E88R1W41-01	1603.51	51.3769	0.0744	30.6283	0.9913	ND	0.2933	14.3127	3.5286	0.0108	0.3051	101.521	69.1497
E88R1W106-03	1604.16	48.1143	0.0242	33.0839	0.5835	0.0037	0.1784	16.8163	1.7356	0.0067	0.3664	100.913	84.2623
E88R1W106-04	1604.16	49.2676	0.0229	31.0844	0.6525	0.006	0.2632	15.0841	2.6548	0.0132	0.2924	99.3411	75.8441
E88R1W106-05	1604.16	48.5845	0.034	31.6473	0.5898	0.0034	0.2581	15.6733	2.4411	0.0196	0.3176	99.5687	78.0124
E88R1W106-06	1604.16	49.1825	0.0185	31.6698	0.5677	0.0168	0.2293	15.6474	2.408	0.028	0.3041	100.072	78.2175
E88R1W106-07	1604.16	51.4116	0.0394	31.5876	0.5641	0.0159	0.2791	14.9567	2.719	ND	0.2944	101.868	75.246
E88R1W106-08	1604.16	51.1088	0.0374	31.6145	0.5758	0.007	0.3414	14.9965	2.7027	0.0036	0.3043	101.692	75.4071
E88R1W106-09	1604.16	50.6856	0.0324	31.6468	0.5656	0.0008	0.2713	14.969	2.7267	0.0077	0.2778	101.184	75.2086
E88R1W106-10	1604.16	50.2793	0.0205	31.8837	0.6247	0.0105	0.2616	15.073	2.6846	0.0039	0.2644	101.106	75.6255
E88R1W106-12	1604.16	50.0244	0.0336	31.4271	0.5673	ND	0.2868	15.3385	2.5367	0.0119	0.2822	100.508	76.9658
E88R1W106-13	1604.16	50.9165	0.0524	30.9586	0.6026	ND	0.3281	14.7568	2.9196	0.0058	0.2872	100.828	73.6361
E88R1W106-14	1604.16	48.3915	0.0051	33.5719	0.5192	ND	0.2439	16.843	1.6123	0.0096	0.3422	101.539	85.235
E88R1W106-15	1604.16	50.6551	0.0325	31.8484	0.5694	0.0166	0.2666	15.1573	2.5875	0.0106	0.346	101.49	76.3988
E88R1W106-16	1604.16	49.0547	0.0351	32.5511	0.5055	0.0054	0.216	16.4752	1.9693	0.0042	0.328	101.144	82.2161
E88R1W106-18	1604.16	53.0201	0.047	30.1392	1.0804	0.0095	0.2477	13.5191	3.4956	0.024	0.3173	101.9	68.124
E88R1W106-19	1604.16	51.6217	0.0411	30.9914	0.793	0.0264	0.2804	14.4239	3.048	0.0233	0.2967	101.546	72.3378
E88R1W106-20	1604.16	52.1602	0.047	30.0597	0.8409	0.0166	0.3617	14.1439	3.2101	0.0152	0.2789	101.134	70.8862
ND = not detected. Wt. % for major element contents. An: anorthite content of plagioclase.
