# Supplementary material for: Basalt derived from highly refractory mantle sources during early Izu-Bonin-Mariana arc development
Source: Research Square preprint supplement (doi:10.21203/rs.3.rs-89845/v1), 2020-10-12
Supplement: Supplementary file 3 [file 78c0b12a399d708ed07fe96d.xlsx]

## Sheet: Sheet1
Supplementary 1 Table 2. Major element compositions of clinopyroxene in Unit 1.
Sample	E70R2W56-15	E70R2W56-16	E70R2W56-17	E71R1W94-16	E71R1W94-17	E71R1W94-18	E71R2W90-3	E71R2W90-4	E71R2W90-5	E71R2W90-6	E71R2W90-7	E71R2W90-8	E71R2W90-9	E72R1W78-17
Subunit	1a	1a	1a	1a	1a	1a	1a	1a	1a	1a	1a	1a	1a	1b
Depth	1466.16	1466.16	1466.16	1471.04	1471.04	1471.04	1472.44	1472.44	1472.44	1472.44	1472.44	1472.44	1472.44	1475.48
SiO2	51.4978	53.6542	51.4199	50.6201	51.6417	51.717	48.9095	49.1095	49.6477	50.0862	49.6707	48.9202	49.1483	51.5205
TiO2	0.3132	0.1783	0.2919	0.5315	0.5544	0.462	1.0232	1.0378	1.1069	0.7788	0.9849	0.9918	0.9743	0.746
Al2O3	3.3255	1.9281	3.7643	3.7976	4.4278	3.811	5.7739	6.3036	4.6711	4.635	4.1321	5.9509	4.4554	4.0899
Cr2O3	0.7544	0.6382	1.2749	0.0402	0.2518	0.212	0.1434	0.2121	0.1459	0.1481	0.0543	0.1442	0.2157	0.4025
FeO	4.8876	4.5362	4.8327	7.4849	5.5253	5.654	8.337	7.5114	10.8098	9.5316	10.1005	8.0272	9.9031	7.1359
MnO	0.1402	0.1387	0.1424	0.1828	0.1203	0.156	0.1829	0.167	0.2537	0.2107	0.2077	0.1687	0.2115	0.1799
MgO	17.2285	18.9433	17.4821	16.2491	16.7146	16.099	14.8226	14.3517	13.7835	14.4541	14.3779	14.1733	14.434	15.8071
CaO	20.8449	20.3722	20.4072	19.8963	21.1938	21.027	20.0045	21.212	19.9739	20.6181	20.2025	21.0974	20.1989	21.0624
Na2O	0.1612	0.1417	0.1966	0.2072	0.1715	0.189	0.2194	0.2207	0.2512	0.2543	0.2589	0.2297	0.2579	0.2457
Total	99.1533	100.531	99.812	99.0097	100.601	99.327	99.4164	100.126	100.644	100.717	99.9895	99.7034	99.7991	101.19
Si4+	1.89354	1.93664	1.87741	1.8768	1.87519	1.90696	1.81682	1.81112	1.84234	1.84591	1.84769	1.81471	1.83006	1.87434
Al3+(tet)	0.10646	0.06336	0.12259	0.1232	0.12481	0.09304	0.18318	0.18888	0.15766	0.15409	0.15231	0.18529	0.16994	0.12566
Al3+(oct)	0.03766	0.01867	0.03941	0.04277	0.0647	0.07259	0.06962	0.08514	0.04665	0.04726	0.02887	0.07491	0.0256	0.04972
Ti4+	0.00866	0.00484	0.00802	0.01482	0.01514	0.01281	0.02858	0.02878	0.03089	0.02159	0.02755	0.02767	0.02728	0.02041
Cr3+	0.02193	0.01821	0.0368	0.00118	0.00723	0.00618	0.00421	0.00618	0.00428	0.00432	0.0016	0.00423	0.00635	0.01158
Fe3+	0.04104	0.02671	0.04426	0.06451	0.03468	0.00216	0.06798	0.05577	0.06303	0.07752	0.08541	0.06733	0.10204	0.04088
Fe2+	0.10926	0.11022	0.10331	0.16758	0.13312	0.1722	0.19102	0.17591	0.27245	0.21627	0.22882	0.18171	0.20635	0.17624
Mn2+	0.00437	0.00424	0.0044	0.00574	0.0037	0.00487	0.00575	0.00522	0.00797	0.00658	0.00654	0.0053	0.00667	0.00554
Mg2+	0.94433	1.01927	0.95151	0.89808	0.90475	0.8849	0.82079	0.789	0.76246	0.7941	0.79729	0.78375	0.80118	0.85725
Ca2+	0.82126	0.78791	0.79837	0.79043	0.82461	0.83077	0.79623	0.83822	0.79419	0.81421	0.80525	0.83858	0.80589	0.82105
Na1+	0.01149	0.00992	0.01392	0.0149	0.01208	0.01351	0.0158	0.01578	0.01807	0.01817	0.01867	0.01652	0.01862	0.01733
Mg#	89.6297	90.2416	90.2059	84.2745	87.1737	83.7101	81.121	81.7693	73.6744	78.5949	77.7001	81.1793	79.5192	82.9475
Wo	43.804	41.0926	43.0811	42.5856	44.2748	44.0055	44.0384	46.4871	43.4199	44.6246	43.97	46.4833	44.4403	44.2724
En	50.3682	53.1589	51.3443	48.3855	48.5779	46.8731	45.3966	43.7572	41.685	43.5223	43.5354	43.4445	44.1806	46.2246
Fs	5.8278	5.74846	5.57458	9.02887	7.14735	9.1214	10.565	9.75577	14.8951	11.8531	12.4946	10.0722	11.3791	9.50296
S1 Table 2. Continued
Sample	E72R1W78-18	E72R1W78-19	E72R1W78-20	E72R1W78-22	E72R1W78-23	E72R1W78-24	E72R1W78-25	E72R1W78-26	E72R1W78-27	E72R1W78-29	E72R1W78-30	E72R1W83-01	E72R1W83-02	E72R1W83-03
Subunit	1b	1b	1b	1b	1b	1b	1b	1b	1b	1b	1b	1b	1b	1b
Depth	1475.48	1475.48	1475.48	1475.48	1475.48	1475.48	1475.48	1475.48	1475.48	1475.48	1475.48	1475.53	1475.53	1475.53
SiO2	50.7967	51.7125	50.4393	51.722	51.3037	51.0509	51.0214	52.1526	50.0666	51.6315	51.8171	50.4793	51.0683	49.4683
TiO2	0.9625	0.6337	0.9536	0.7233	0.8564	0.6291	0.6096	0.5302	0.8215	0.7387	0.533	0.6692	0.669	0.9351
Al2O3	3.3716	3.4755	3.6185	4.7496	3.3	4.2957	4.395	3.0417	5.3891	3.4285	3.9567	4.15	3.4059	5.1452
Cr2O3	0.024	0.1097	0.0206	0.156	0.0192	0.3192	0.3185	0.1359	0.6632	0.0677	0.3263	0.235	0.1604	0.4285
FeO	10.6146	7.4636	10.4455	6.1549	10.2298	6.4261	6.4297	7.2717	6.0193	8.0387	7.463	6.5008	7.3383	6.0169
MnO	0.2604	0.1756	0.2861	0.1187	0.2632	0.1281	0.1553	0.1749	0.1214	0.2228	0.1732	0.1391	0.17	0.1213
MgO	14.2659	16.2163	15.0377	15.4993	14.7471	15.7833	15.7029	16.1082	15.0519	15.852	16.0449	15.8389	16.4504	15.2945
CaO	20.0755	20.2148	18.8397	21.8061	20.0474	21.9526	22.034	20.898	21.9859	20.7516	20.915	21.2765	20.3566	21.8803
Na2O	0.325	0.2703	0.3204	0.2485	0.3125	0.2478	0.2792	0.2495	0.2576	0.232	0.2807	0.264	0.2136	0.2562
Total	100.696	100.272	99.9614	101.178	101.079	100.833	100.946	100.563	100.376	100.963	101.51	99.5528	99.8325	99.5463
Si4+	1.88103	1.8956	1.87436	1.8776	1.88788	1.85887	1.85566	1.90752	1.83406	1.88592	1.87742	1.86038	1.8785	1.82454
Al3+(tet)	0.11897	0.1044	0.12564	0.1224	0.11212	0.14113	0.14434	0.09248	0.16594	0.11408	0.12258	0.13962	0.1215	0.17546
Al3+(oct)	0.0282	0.04577	0.03285	0.08083	0.03101	0.04324	0.04407	0.03865	0.06675	0.03353	0.04639	0.04066	0.02617	0.04822
Ti4+	0.02681	0.01747	0.02665	0.01975	0.0237	0.01723	0.01667	0.01458	0.02263	0.02029	0.01452	0.01855	0.01851	0.02594
Cr3+	0.000702685	0.00318	0.000605256	0.00448	0.000558618	0.00919	0.00916	0.00393	0.01921	0.00196	0.00935	0.00685	0.00467	0.0125
Fe3+	0.0598	0.03973	0.06197	0.0151	0.05545	0.07174	0.07745	0.03843	0.05302	0.05444	0.05752	0.07388	0.06889	0.08119
Fe2+	0.26893	0.18908	0.26266	0.17177	0.25937	0.12395	0.11812	0.18401	0.13139	0.19113	0.16862	0.12649	0.15686	0.10441
Mn2+	0.00817	0.00545	0.00901	0.00365	0.0082	0.00395	0.00478	0.00542	0.00377	0.00689	0.00532	0.00434	0.0053	0.00379
Mg2+	0.7875	0.88612	0.83302	0.83874	0.80895	0.85671	0.85136	0.87827	0.82195	0.86314	0.86659	0.87017	0.90204	0.84091
Ca2+	0.79657	0.79399	0.75016	0.8482	0.79046	0.8565	0.85868	0.81901	0.86298	0.81218	0.81197	0.8402	0.80234	0.86472
Na1+	0.02334	0.01921	0.02309	0.01749	0.0223	0.0175	0.01969	0.01769	0.0183	0.01643	0.01972	0.01887	0.01523	0.01832
Mg#	74.5431	82.4141	76.0279	83.002	75.7213	87.3605	87.816	82.678	86.2177	81.8708	83.7112	87.3088	85.1866	88.9548
Wo	42.9879	42.4777	40.6406	45.6339	42.5255	46.6208	46.9696	43.5346	47.5126	43.5148	43.9571	45.7413	43.1079	47.7733
En	42.4986	47.4065	45.1297	45.125	43.5204	46.6323	46.5692	46.6845	45.2534	46.2449	46.9141	47.3727	48.4644	46.4582
Fs	14.5135	10.1158	14.2297	9.24115	13.954	6.74687	6.4612	9.7809	7.23396	10.2403	9.12872	6.88606	8.42767	5.76857
S1 Table 2. Continued
Sample	E72R1W83-04	E72R1W83-05	E72R1W83-06	E72R1W83-07	E72R1W83-10	E72R1W83-11	E72R1W83-12	E72R1W83-13	E72R1W83-14	E73R1W77-02	E73R1W77-03	E73R1W77-04	E73R1W77-05	E73R1W77-06
Subunit	1b	1b	1b	1b	1b	1b	1b	1b	1b	1b	1b	1b	1b	1b
Depth	1475.53	1475.53	1475.53	1475.53	1475.53	1475.53	1475.53	1475.53	1475.53	1485.17	1485.17	1485.17	1485.17	1485.17
SiO2	49.9251	49.3224	50.7824	51.091	52.1921	50.0692	51.861	50.5769	49.5441	51.54	50.535	49.7759	50.9989	49.7088
TiO2	1.0671	1.1242	0.8146	0.6672	0.4568	0.9767	0.6422	0.7638	0.9756	0.5705	0.9652	1.1014	0.8326	1.051
Al2O3	3.1289	3.3041	3.221	3.1932	1.9837	5.6778	3.2718	4.0261	5.0563	2.143	5.1437	3.6229	3.82	6.0797
Cr2O3	0.0116	0.0164	0.0226	0.144	0.0472	0.551	0.1133	0.4923	0.5497	0.0228	0.2051	0.0078	0.127	0.3924
FeO	11.4701	12.1597	9.2143	7.8374	6.9687	6.0812	7.629	7.1633	6.3236	10.5258	7.968	13.3595	9.6758	7.2322
MnO	0.2805	0.3218	0.2063	0.1879	0.193	0.1227	0.1857	0.1774	0.1311	0.2831	0.1844	0.316	0.2376	0.1679
MgO	14.3867	14.507	15.0697	15.8704	17.3067	15.0018	15.9856	15.8572	15.0218	14.7731	14.1695	12.6767	14.5442	14.355
CaO	18.8598	18.0558	19.8787	20.5593	20.4736	20.9085	20.3811	20.7021	21.1443	19.795	20.9802	18.7791	19.7414	20.7757
Na2O	0.3224	0.3084	0.2822	0.2495	0.1826	0.362	0.2699	0.2875	0.2781	0.2378	0.2321	0.303	0.249	0.2478
Total	99.4522	99.1198	99.4918	99.7999	99.8044	99.7509	100.34	100.047	99.0246	99.8911	100.383	99.9423	100.227	100.01
Si4+	1.87451	1.85968	1.8913	1.88605	1.91542	1.84434	1.90282	1.85935	1.84076	1.92225	1.86547	1.87962	1.89168	1.83585
Al3+(tet)	0.12549	0.14032	0.1087	0.11395	0.08458	0.15566	0.09718	0.14065	0.15924	0.07775	0.13453	0.12038	0.10832	0.16415
Al3+(oct)	0.01298	0.00652	0.0327	0.025	0.00123	0.09086	0.04432	0.03381	0.06219	0.01645	0.08928	0.04087	0.05869	0.10051
Ti4+	0.03013	0.03188	0.02282	0.01852	0.01261	0.02706	0.01772	0.02112	0.02726	0.016	0.0268	0.03128	0.02323	0.02919
Cr3+	0.000344362	0.000488908	0.000665494	0.0042	0.00137	0.01605	0.00329	0.01431	0.01615	0.000672338	0.00599	0.000232881	0.00372	0.01146
Fe3+	0.07538	0.0921	0.05008	0.06556	0.06975	0.0205	0.03333	0.07078	0.04642	0.04582	0.00229	0.03891	0.01736	0.01155
Fe2+	0.2848	0.29134	0.23692	0.17641	0.14413	0.16684	0.20077	0.14946	0.15007	0.2825	0.2437	0.383	0.2828	0.21183
Mn2+	0.00892	0.01028	0.00651	0.00588	0.006	0.00383	0.00577	0.00552	0.00413	0.00894	0.00577	0.01011	0.00747	0.00525
Mg2+	0.80523	0.81538	0.83665	0.87335	0.94681	0.82376	0.87433	0.86901	0.83199	0.82134	0.77972	0.71358	0.8042	0.79031
Ca2+	0.75875	0.72947	0.79329	0.81323	0.8051	0.82525	0.80127	0.81549	0.84177	0.79107	0.82985	0.75983	0.78462	0.82215
Na1+	0.02347	0.02255	0.02038	0.01786	0.01299	0.02586	0.0192	0.02049	0.02003	0.0172	0.01661	0.02219	0.01791	0.01775
Mg#	73.8725	73.6755	77.9315	83.1953	86.7881	83.1578	81.3257	85.3253	84.7189	74.4075	76.1877	65.0732	73.9834	78.8622
Wo	41.0408	39.7272	42.4933	43.6519	42.462	45.447	42.7033	44.4661	46.154	41.747	44.7775	40.9302	41.9219	45.0669
En	43.5547	44.4063	44.8159	46.879	49.9362	45.365	46.597	47.3845	45.6177	43.3448	42.0727	38.4389	42.9682	43.3212
Fs	15.4046	15.8665	12.6909	9.46913	7.60185	9.1879	10.6998	8.14944	8.22826	14.9082	13.1498	20.631	15.1099	11.6119
S1 Table 2. Continued
Sample	E73R1W77-07	E73R1W77-08	E73R1W77-09	E73R1W77-10	E73R1W77-11	E73R2W61-10	E73R2W61-11	E73R2W61-12	E73R2W61-13	E73R2W61-14	E73R2W61-15	E73R2W61-16	E73R2W61-17	E74R2W15-10
Subunit	1b	1b	1b	1b	1b	1b	1b	1b	1b	1b	1b	1b	1b	1c
Depth	1485.17	1485.17	1485.17	1485.17	1485.17	1486.2	1486.2	1486.2	1486.2	1486.2	1486.2	1486.2	1486.2	1495.63
SiO2	50.8685	50.3941	49.8001	50.7292	50.739	49.481	49.861	48.922	49.059	49.145	48.816	51.39	49.944	52.258
TiO2	0.9235	0.7438	0.9235	0.9051	0.7949	0.883	0.864	1.248	1.323	1.334	1.272	0.51	1.124	0.417
Al2O3	3.609	4.7767	3.4411	4.6686	3.622	6.102	5.911	6.032	6.328	4.79	4.985	2.255	5.504	2.992
Cr2O3	0.0087	0.2703	0.0416	0.2062	0.0668	0.872	0.409	0.312	0.485	0.21	0.259	0.063	0.151	0.436
FeO	12.0203	8.2685	11.4161	8.4147	8.9132	6.379	6.266	7.878	7.306	11.577	10.121	10.949	8.58	6.646
MnO	0.2984	0.1982	0.2848	0.208	0.2168	0.181	0.237	0.183	0.197	0.3	0.24	0.329	0.181	0.196
MgO	13.6981	14.5335	13.6832	14.3677	15.0504	14.667	14.694	13.085	13.474	12.466	12.913	14.854	13.345	16.989
CaO	18.8009	20.7583	19.0196	20.6209	20.1156	21.133	21.632	22.224	21.288	20.056	20.259	18.888	21.516	19.856
Na2O	0.3284	0.2955	0.2873	0.2357	0.2535	0.266	0.231	0.242	0.264	0.314	0.319	0.191	0.304	0.197
Total	100.556	100.239	98.8973	100.356	99.7722	99.964	100.105	100.126	99.724	100.192	99.184	99.429	100.649	99.987
Si4+	1.89576	1.86023	1.88447	1.87435	1.88309	1.82353	1.83357	1.81615	1.82408	1.84446	1.84044	1.92709	1.84529	1.91508
Al3+(tet)	0.10424	0.13977	0.11553	0.12565	0.11691	0.17647	0.16643	0.18385	0.17592	0.15554	0.15956	0.07291	0.15471	0.08492
Al3+(oct)	0.05429	0.06806	0.03795	0.07767	0.04154	0.08859	0.08978	0.08009	0.1014	0.05636	0.06196	0.02676	0.08499	0.04432
Ti4+	0.02588	0.02065	0.02628	0.02515	0.02219	0.02447	0.02389	0.03484	0.03699	0.03765	0.03607	0.01438	0.03123	0.01149
Cr3+	0.000256355	0.00789	0.00124	0.00602	0.00196	0.02541	0.01189	0.00916	0.01426	0.00623	0.00772	0.00187	0.00441	0.01263
Fe3+	0.02166	0.04368	0.04486	0.00854	0.04727	0.03254	0.03344	0.04234	0.00531	0.04049	0.04106	0.02941	0.02462	0.01898
Fe2+	0.35299	0.21159	0.31643	0.25148	0.22938	0.16407	0.15927	0.20225	0.22188	0.32289	0.27806	0.31397	0.2405	0.18471
Mn2+	0.00942	0.0062	0.00913	0.00651	0.00682	0.00565	0.00738	0.00575	0.0062	0.00954	0.00766	0.01045	0.00566	0.00608
Mg2+	0.761	0.79973	0.77185	0.79135	0.83266	0.80576	0.8055	0.72412	0.74681	0.69744	0.72573	0.83034	0.735	0.92809
Ca2+	0.75077	0.82106	0.77118	0.81638	0.79994	0.83451	0.85237	0.88402	0.84811	0.80655	0.81841	0.75893	0.8518	0.77969
Na1+	0.02373	0.02115	0.02108	0.01689	0.01824	0.01901	0.01647	0.01742	0.01903	0.02285	0.02332	0.01389	0.02178	0.014
Mg#	68.313	79.0778	70.9238	75.8849	78.4019	83.0826	83.4914	78.1675	77.0948	68.3544	72.299	72.5625	75.346	83.4013
Wo	40.2609	44.8082	41.4732	43.9101	42.9618	46.25	46.9072	48.8303	46.6816	44.1489	44.9133	39.8757	46.6152	41.199
En	40.8095	43.6446	41.5096	42.5637	44.719	44.6568	44.3279	39.9978	41.1058	38.1766	39.8272	43.6276	40.2235	49.0408
Fs	18.9296	11.5472	17.0172	13.5263	12.3192	9.09317	8.76491	11.1718	12.2126	17.6745	15.2595	16.4967	13.1614	9.76027
S1 Table 2. Continued
Sample	E75R1W26-06	E75R1W26-07	E75R1W26-08	E76R2W23-13	E77R2W32-09	E77R2W32-10	E77R2W32-11	E77R2W32-12	E78R4W48-11	E80R1W93-10	E80R1W93-11	E80R1W93-13	E81R1W54-01	E81R1W54-02
Subunit	1c	1c	1c	1c	1c	1c	1c	1c	1c	1c	1c	1c	1d	1d
Depth	1504.06	1504.06	1504.06	1508.44	1512.46	1512.46	1512.46	1512.46	1520.09	1534.53	1534.53	1534.53	1543.44	1543.44
SiO2	50.935	51.249	49.64	50.784	51.7853	51.5969	52.2069	50.2181	51.3981	51.02	51.2405	51.7411	51.525	51.625
TiO2	0.906	0.633	0.901	0.871	0.6998	0.6252	0.5018	0.8857	0.7721	0.834	0.7451	0.9312	0.575	0.595
Al2O3	2.77	2.691	5.105	3.961	3.1944	3.6065	1.4891	2.6326	3.2198	2.4572	3.197	2.9608	3.845	4.289
Cr2O3	0.045	0.048	0.306	0.259	0.0661	0.2927	0.0045	0.0218	0.1346	0.0652	0.2826	0.3446	0.063	0.14
FeO	12.652	10.77	8.041	8.013	10.5745	8.3289	14.5694	14.9601	10.0478	11.8103	8.6614	10.528	8.03	6.441
MnO	0.233	0.192	0.205	0.249	0.2544	0.195	0.4047	0.369	0.2387	0.2871	0.2149	0.256	0.186	0.139
MgO	13.756	14.595	13.952	14.721	14.8176	15.5486	15.8193	13.5858	14.7348	14.8047	15.9533	14.516	16.016	16.607
CaO	17.969	18.931	20.382	20.572	19.1836	19.7468	15.1874	17.2678	19.3512	18.231	19.3385	19.3118	19.792	19.715
Na2O	0.285	0.28	0.268	0.293	0.2802	0.2371	0.2235	0.2934	0.2893	0.2968	0.2487	0.3018	0.23	0.212
Total	99.551	99.389	98.8	99.723	100.856	100.178	100.407	100.234	100.186	99.8063	99.882	100.891	100.262	99.763
Si4+	1.92193	1.92143	1.86209	1.88472	1.91133	1.90259	1.94876	1.8923	1.90811	1.90916	1.89423	1.91382	1.89185	1.89389
Al3+(tet)	0.07807	0.07857	0.13791	0.11528	0.08867	0.09741	0.05124	0.1077	0.09189	0.09084	0.10577	0.08618	0.10815	0.10611
Al3+(oct)	0.04513	0.04035	0.08781	0.05799	0.0503	0.05934	0.01428	0.00923	0.049	0.01754	0.03353	0.0429	0.05826	0.07935
Ti4+	0.02571	0.01785	0.02542	0.02431	0.01942	0.01734	0.01409	0.0251	0.02156	0.02347	0.02072	0.0259	0.01588	0.01642
Cr3+	0.00134	0.00142	0.00908	0.0076	0.00193	0.00853	0.00013281	0.000649495	0.00395	0.00193	0.00826	0.01008	0.00183	0.00406
Fe3+	0.00103	0.02145	0.00967	0.02216	0.01765	0.01181	0.02483	0.06905	0.01665	0.04596	0.04038	0.00304	0.03268	0.00495
Fe2+	0.39823	0.31625	0.24259	0.22655	0.30876	0.24504	0.43	0.4024	0.29531	0.32365	0.22741	0.32263	0.2139	0.19267
Mn2+	0.00745	0.0061	0.00651	0.00783	0.00795	0.00609	0.0128	0.01178	0.00751	0.0091	0.00673	0.00802	0.00578	0.00432
Mg2+	0.77375	0.81571	0.78018	0.81441	0.81526	0.85468	0.88025	0.76314	0.81544	0.82583	0.87914	0.80039	0.87662	0.90819
Ca2+	0.72651	0.76052	0.81924	0.81807	0.75867	0.78021	0.60745	0.69721	0.76976	0.73098	0.76601	0.76539	0.77867	0.77497
Na1+	0.02085	0.02036	0.01949	0.02108	0.02005	0.01695	0.01618	0.02144	0.02082	0.02154	0.01783	0.02165	0.01637	0.01508
Mg#	66.0208	72.0617	76.2811	78.2364	72.5307	77.718	67.1818	65.4752	73.4135	71.8438	79.4487	71.2712	80.3855	82.4982
Wo	38.2676	40.1863	44.4752	44.0052	40.2971	41.5021	31.6758	37.4289	40.9339	38.8725	40.9072	40.5308	41.658	41.3136
En	40.7563	43.1026	42.3549	43.8086	43.3028	45.4632	45.9015	40.9685	43.3625	43.9164	46.9486	42.3843	46.8984	48.4153
Fs	20.9761	16.7111	13.1699	12.1862	16.4001	13.0347	22.4227	21.6026	15.7037	17.2111	12.1441	17.0849	11.4436	10.2711
S1 Table 2. Continued
Sample	E81R1W54-03	E81R1W54-04	E81R1W54-05	E81R1W54-06	E81R1W54-07	E82R1W23-01	E82R1W23-02	E82R2W91-01	E82R2W91-02	E82R2W91-03	E82R2W91-04	E82R2W91-05	E82R2W91-06	E82R2W91-07
Subunit	1d	1d	1d	1d	1d	1d	1d	1d	1d	1d	1d	1d	1d	1d
Depth	1543.44	1543.44	1543.44	1543.44	1543.44	1552.23	1552.23	1554.25	1554.25	1554.25	1554.25	1554.25	1554.25	1554.25
SiO2	52.006	51.356	52.929	51.613	51.843	49.809	51.303	50.826	52.49	51.89	51.623	51.496	51.522	51.368
TiO2	0.461	0.754	0.399	0.799	0.653	1.134	0.669	0.769	0.548	0.338	0.57	0.584	0.713	0.568
Al2O3	3.984	4.096	3.191	5.199	3.801	5.9	4.916	5.227	4.208	3.173	4.453	4.484	4.348	4.865
Cr2O3	0.298	0.09	0.173	0.117	0.14	0.04	0.09	0.042	0.201	0.264	0.032	0.079	0.106	0.048
FeO	6.783	7.155	5.929	6.937	8.201	8.004	7.51	7.036	6.693	5.944	7.088	7.87	8.43	6.447
MnO	0.138	0.185	0.232	0.137	0.21	0.133	0.216	0.201	0.152	0.135	0.209	0.206	0.197	0.134
MgO	17.621	15.595	17.408	16.816	16.31	15.487	17.122	15.341	16.95	17.142	17.047	16.935	16.682	16.027
CaO	18.324	20.298	20.055	19.119	18.826	19.632	17.918	20.169	19.496	19.984	18.424	18.022	18.239	20.023
Na2O	0.201	0.236	0.206	0.233	0.284	0.333	0.18	0.254	0.306	0.318	0.249	0.226	0.204	0.252
Total	99.816	99.765	100.522	100.97	100.268	100.472	99.924	99.865	101.044	99.188	99.695	99.902	100.441	99.732
Si4+	1.9021	1.89475	1.92258	1.87076	1.90254	1.82413	1.8791	1.8716	1.90012	1.9084	1.89326	1.88919	1.88569	1.88666
Al3+(tet)	0.0979	0.10525	0.07742	0.12924	0.09746	0.17587	0.1209	0.1284	0.09988	0.0916	0.10674	0.11081	0.11431	0.11334
Al3+(oct)	0.07385	0.07288	0.0592	0.09287	0.06695	0.07882	0.09134	0.09847	0.07967	0.04594	0.08576	0.08308	0.07326	0.09728
Ti4+	0.01268	0.02092	0.0109	0.02178	0.01802	0.03123	0.01843	0.0213	0.01492	0.00935	0.01572	0.01611	0.01963	0.01569
Cr3+	0.00862	0.00263	0.00497	0.00335	0.00406	0.00116	0.00261	0.00122	0.00575	0.00768	0.000927911	0.00229	0.00307	0.00139
Fe3+	0.00433	0.00478	0.00596	0.00583	0.01062	0.05707	0.00288	0.00425	0.00609	0.04196	0.00631	0.00929	0.01321	0.00123
Fe2+	0.20315	0.21599	0.17416	0.20445	0.24109	0.18808	0.22717	0.21244	0.19654	0.14086	0.21109	0.23217	0.24482	0.1968
Mn2+	0.00428	0.00578	0.00714	0.00421	0.00653	0.00413	0.0067	0.00627	0.00466	0.00421	0.00649	0.0064	0.00611	0.00417
Mg2+	0.96073	0.8577	0.9426	0.90859	0.89225	0.84548	0.93487	0.84211	0.91467	0.9398	0.93198	0.92614	0.91015	0.87749
Ca2+	0.71812	0.80243	0.78056	0.74254	0.74028	0.77038	0.70322	0.7958	0.75621	0.78752	0.72401	0.70843	0.71527	0.788
Na1+	0.01425	0.01688	0.01451	0.01638	0.02021	0.02365	0.01278	0.01814	0.02148	0.02268	0.01771	0.01608	0.01448	0.01795
Mg#	82.5455	79.8834	84.4049	81.6314	78.7275	81.8027	80.4508	79.8549	82.313	86.9654	81.5331	79.9561	78.8029	81.6809
Wo	38.1571	42.7707	41.1402	40.0164	39.5107	42.7055	37.7009	43.0081	40.495	42.1543	38.7778	37.9502	38.2448	42.3134
En	51.0483	45.7166	49.6807	48.9656	47.6219	46.8686	50.1201	45.5109	48.9803	50.3056	49.9163	49.6125	48.6648	47.119
Fs	10.7946	11.5126	9.17913	11.018	12.8674	10.4259	12.179	11.481	10.5247	7.54016	11.3058	12.4374	13.0904	10.5676
S1 Table 2. Continued
Sample	E82R3W58-08	E83R1W121-02	E83R1W121-03	E83R1W121-04	E85R1W134-12	E86R2W16-01	E87R1W86-01	E87R1W86-02	E88R1W41-18	E88R1W41-19	E88R1W41-20	E88R1W41-21	E88R1W106-03
Subunit	1d	1d	1d	1d	1e	1e	1e	1e	1e	1e	1e	1e	1f
Depth	1555.28	1562.61	1562.61	1562.61	1580.44	1586.42	1594.86	1594.86	1603.51	1603.51	1603.51	1603.51	1604.16
SiO2	52.139	52.367	50.728	51.183	53.3238	50.667	51.8126	52.1489	53.4237	51.5249	50.9457	50.9794	53.8025
TiO2	0.492	0.593	0.81	0.725	0.2006	0.513	0.5848	0.4851	0.2827	0.4381	0.7978	0.785	0.2461
Al2O3	3.789	3.768	4.726	3.993	2.124	5.302	3.9982	3.5606	2.8984	4.178	5.4296	4.9847	1.83
Cr2O3	0.169	0.214	0.055	0.092	0.5566	1.088	0.0486	0.0272	0.5133	0.3147	0.066	0.082	0.3533
FeO	6.566	6.074	7.316	7.972	5.2472	5.071	9.2431	8.3618	5.1612	5.8441	7.7652	9.0408	5.3952
MnO	0.153	0.098	0.157	0.264	0.1558	0.089	0.242	0.2053	0.1349	0.1539	0.188	0.2053	0.1554
MgO	17.035	16.53	15.811	16.399	20.3076	16.657	17.4344	16.9777	17.9301	17.0097	16.1868	16.2743	18.5642
CaO	19.533	20.983	19.679	18.612	18.1017	19.89	17.0681	18.7501	20.8948	21.2263	19.8389	18.5422	19.8392
Na2O	0.206	0.214	0.248	0.262	0.1513	0.219	0.2044	0.1961	0.2236	0.1913	0.2141	0.2394	0.1402
Total	100.082	100.841	99.53	99.502	100.169	99.496	100.636	100.713	101.463	100.881	101.432	101.133	100.326
Si4+	1.90544	1.90208	1.87293	1.8905	1.9233	1.85855	1.89075	1.90188	1.91758	1.86487	1.84497	1.85654	1.95165
Al3+(tet)	0.09456	0.09792	0.12707	0.1095	0.0767	0.14145	0.10925	0.09812	0.08242	0.13513	0.15503	0.14346	0.04835
Al3+(oct)	0.06866	0.0634	0.0786	0.06434	0.0136	0.08779	0.06272	0.05494	0.0402	0.04311	0.07673	0.07051	0.02989
Ti4+	0.01352	0.0162	0.02249	0.02014	0.00544	0.01415	0.01605	0.01331	0.00763	0.01193	0.02173	0.0215	0.00671
Cr3+	0.00488	0.00615	0.00161	0.00269	0.01587	0.03155	0.0014	0.000784322	0.01457	0.00901	0.00189	0.00236	0.01013
Fe3+	0.00857	0.01106	0.01963	0.02096	0.04692	0.00938	0.0275	0.02966	0.02795	0.0726	0.04799	0.04449	0.00476
Fe2+	0.19211	0.17345	0.20627	0.2253	0.11136	0.14619	0.2546	0.22538	0.12698	0.1043	0.18719	0.23086	0.15891
Mn2+	0.00474	0.00302	0.00491	0.00826	0.00476	0.00277	0.00748	0.00634	0.0041	0.00472	0.00577	0.00633	0.00477
Mg2+	0.92804	0.89502	0.87021	0.90294	1.09188	0.91083	0.94841	0.92301	0.95938	0.91773	0.87384	0.88349	1.00384
Ca2+	0.76489	0.81664	0.77852	0.73661	0.69958	0.78177	0.66739	0.73271	0.80362	0.82319	0.76983	0.72354	0.77111
Na1+	0.0146	0.01507	0.01775	0.01876	0.01058	0.01558	0.01446	0.01387	0.01556	0.01343	0.01503	0.0169	0.00986
Mg#	82.8496	83.7665	80.8385	80.0308	90.745	86.1696	78.8364	80.3743	88.3114	89.7948	82.3573	79.2827	86.3333
Wo	40.5767	43.3205	41.9688	39.4997	36.7656	42.5155	35.6817	38.9513	42.52	44.6119	42.0473	39.368	39.8741
En	49.2318	47.4782	46.9114	48.4188	57.3821	49.5341	50.7063	49.0673	50.7614	49.7357	47.7283	48.0707	51.9085
Fs	10.1915	9.20125	11.1198	12.0815	5.85224	7.95034	13.612	11.9814	6.71862	5.65248	10.2244	12.5613	8.21734
Mg# = 100*Mg/(Mg+Fe2+), mbsf for depth and wt. % for major elements, Cation abundances are calculated based on stoichiometry with 6 oxygen anions. Wo: Wollastonite (Ca2Si2O6), En: Enstatite (Mg2Si2O6), Fs: Ferrosilite (Fe2Si2O6).
