# Supplementary material for: Basalt derived from highly refractory mantle sources during early Izu-Bonin-Mariana arc development
Source: Research Square preprint supplement (doi:10.21203/rs.3.rs-89845/v1), 2020-10-12
Supplement: Supplementary file 6 [file d14b5b658f3f8cf1846909d4.xlsx]

## Sheet: Sheet1
Supplementary 1 Table 1. Major and trace element compositions for clinopyroxene in Unit 1.
Sample	E70R2W56-01	E70R2W56-02	E70R2W56-03	E70R2W56-04	E70R2W56-05	E70R2W56-06	E70R2W56-07	E70R2W56-08	E70R2W56-09	E70R2W56-10	E70R2W56-11	E70R2W56-12
Subunit	1a	1a	1a	1a	1a	1a	1a	1a	1a	1a	1a	1a
Depth (mbsf)	1466.16	1466.16	1466.16	1466.16	1466.16	1466.16	1466.16	1466.16	1466.16	1466.16	1466.16	1466.16
SiO2	51.9132	53.0752	51.698	51.9203	52.0822	51.494	52.2262	51.6467	52.3175	51.9701	51.8226	52.4344
TiO2	0.3774	0.1831	0.2865	0.3111	0.3145	0.2791	0.26	0.2853	0.1911	0.2866	0.2035	0.3018
Al2O3	4.131	1.9945	3.6051	3.2216	3.4144	3.541	3.3312	3.3463	2.096	2.9841	1.932	2.9237
Cr2O3	1.0885	0.7797	1.2723	1.1548	1.2551	1.3157	1.1914	1.2456	0.7352	0.8196	0.6018	0.4168
FeO	4.8497	4.5512	4.499	4.5358	4.4964	4.4463	4.4231	4.7177	4.3264	4.5731	4.3325	5.1773
MnO	0.1338	0.1306	0.1337	0.1251	0.1222	0.1256	0.1208	0.1212	0.1287	0.1178	0.1087	0.1511
MgO	17.636	18.9147	17.2313	17.6046	17.0828	17.1648	17.3926	17.1405	18.5314	17.3574	17.8134	17.4099
CaO	20.108	20.2638	20.897	20.8942	20.9264	21.2868	21.1595	20.1276	20.7007	21.0831	21.0185	20.7601
Na2O	0.1678	0.1449	0.2071	0.188	0.2042	0.1896	0.1879	0.1815	0.1646	0.187	0.1581	0.1627
Total	100.405	100.038	99.83	99.9555	99.8982	99.8429	100.293	98.8124	99.1916	99.3788	97.9911	99.7378
Si4+	1.88335	1.92498	1.8881	1.89214	1.90283	1.88094	1.89817	1.90739	1.9135	1.90535	1.92244	1.91702
Al3+(tet)	0.11665	0.07502	0.1119	0.10786	0.09717	0.11906	0.10183	0.09261	0.0865	0.09465	0.07756	0.08298
Al3+(oct)	0.06	0.01025	0.04329	0.03053	0.04987	0.0334	0.04088	0.05306	0.00386	0.03431	0.00692	0.04302
Ti4+	0.0103	0.00499	0.00787	0.00853	0.00864	0.00767	0.00711	0.00792	0.00526	0.0079	0.00568	0.0083
Cr3+	0.03122	0.02236	0.03674	0.03327	0.03626	0.038	0.03424	0.03637	0.02126	0.02376	0.01765	0.01205
Fe3+	0.01664	0.04261	0.0308	0.04029	0.00823	0.04576	0.02573	0.000329114	0.06254	0.03407	0.053	0.02285
Fe2+	0.1305	0.09544	0.10661	0.09795	0.12916	0.09007	0.10871	0.14539	0.06979	0.10615	0.08141	0.13546
Mn2+	0.00411	0.00401	0.00414	0.00386	0.00378	0.00389	0.00372	0.00379	0.00399	0.00366	0.00342	0.00468
Mg2+	0.95377	1.02264	0.93812	0.95638	0.93038	0.93464	0.94233	0.94365	1.01037	0.94863	0.98508	0.94885
Ca2+	0.78166	0.7875	0.81776	0.8159	0.81922	0.83315	0.82404	0.7965	0.81126	0.82823	0.83547	0.81327
Na1+	0.0118	0.01019	0.01467	0.01328	0.01447	0.01343	0.01324	0.013	0.01167	0.01329	0.01137	0.01153
100*Mg/(Mg+Fe2+)	87.9643	91.4639	89.7955	90.7097	87.8098	91.2102	89.6569	86.6497	93.5389	89.9363	92.3666	87.5073
Wo (%)	41.8911	41.3259	43.9069	43.6254	43.6042	44.8445	43.9469	42.2426	42.8916	43.9843	43.9267	42.8584
En (%)	51.115	53.6656	50.3689	51.137	49.5209	50.3075	50.2553	50.0469	53.4183	50.3783	51.7928	50.0032
Fs (%)	6.99397	5.00853	5.72423	5.23754	6.87489	4.84801	5.79779	7.71059	3.69006	5.63738	4.28052	7.13838
Sc	114.922	88.5956	89.4071	91.6248	112.724	114.276	85.5975	95.089	91.2655	103.464	129.948	127.167
Ti	2157.67	1442.91	1631.8	1450.2	2114.55	2090.41	1451.16	1754.39	1697.29	1811.36	2449.63	2215.04
V	255.082	183.77	198.198	176.607	254.364	260.617	181.893	213.18	210.739	223.269	283.082	278.726
Cr	7265.48	3648.99	3094.6	4446.09	7727.65	6269.69	4709.58	6196.54	6112.36	4250.84	6561.82	3231.97
Mn	976.087	1090.7	1083.02	1133.95	1050.46	935.568	1069.71	944.594	1020.5	1076.33	1076.65	1030.63
Co	37.0988	43.5689	40.437	41.2512	38.8033	37.5357	39.9468	36.5405	38.1989	41.284	42.7236	42.8435
Ni	249.46	249.311	235.766	264.825	253.419	233.095	259.924	241.149	255.879	238.298	258.041	215.385
Rb	0.0200043	0.0189092	0	0.0105932	0	0.0342746	0.0166852	0.0190631	0.0146369	0.0274445	0.0109007	0.0424051
Sr	6.93706	9.33263	7.01894	7.24493	6.95991	9.10268	6.62681	6.72349	6.61747	8.85431	10.9964	13.018
Y	10.4122	6.75815	7.48328	6.96475	9.89581	8.7057	6.48487	7.6357	7.66207	8.06707	11.7146	9.73675
Zr	6.31803	3.46686	3.77847	3.1907	5.37603	6.01226	2.94997	4.21866	3.57013	4.97562	9.42517	7.61889
Nb	0.00601386	0.00414834	0.00353794	0.00533252	0.0106504	0.00665961	0.0119317	0.00646931	0.00542506	0.00713383	0.012163	0.0118336
Ba	0.0393005	0.045961	0.0356819	0	0.0149315	0.0425856	0	0.0215567	0.0513389	1.00328	0.129287	0.0370316
La	0.122704	0.0745088	0.0877081	0.0576175	0.0955071	0.115833	0.0569402	0.0797288	0.0774989	0.0938894	0.139197	0.10276
Ce	0.650107	0.395391	0.457229	0.343704	0.552847	0.563247	0.353919	0.444956	0.463938	0.503289	0.80327	0.613553
Pr	0.175373	0.0884503	0.10856	0.102809	0.146008	0.139483	0.0954493	0.116505	0.122548	0.139518	0.190939	0.162537
Nd	1.37956	0.74013	0.947181	0.932203	1.15171	1.20717	0.781409	0.906362	0.947587	1.03938	1.61024	1.27442
Sm	0.757291	0.514862	0.542086	0.53168	0.794567	0.659822	0.531083	0.613441	0.515943	0.593356	0.872992	0.685421
Eu	0.270308	0.168161	0.212696	0.217294	0.301662	0.239863	0.196628	0.214651	0.230024	0.250106	0.377447	0.318808
Gd	1.43192	0.874621	0.996774	0.868793	1.24988	1.13336	0.905171	0.957302	0.962145	1.12173	1.60548	1.23859
Tb	0.274529	0.163702	0.193882	0.171718	0.237193	0.226832	0.173105	0.206192	0.195175	0.213412	0.292153	0.22184
Dy	2.06886	1.29847	1.36589	1.35115	1.755	1.71558	1.12948	1.51508	1.43591	1.59046	2.20457	1.70597
Ho	0.419203	0.279716	0.318617	0.2567	0.429798	0.3821	0.269245	0.295847	0.333931	0.358817	0.453727	0.392681
Er	1.20224	0.742312	0.878262	0.844437	1.135	1.04542	0.750989	0.934741	0.800529	1.08898	1.6093	1.15117
Tm	0.168033	0.103396	0.116502	0.112769	0.163612	0.15148	0.112442	0.113018	0.121838	0.141704	0.192396	0.172856
Yb	1.08133	0.769148	0.927941	0.767835	1.10112	0.840534	0.718709	0.895643	0.800272	0.953071	1.38261	1.15781
Lu	0.159296	0.103857	0.113662	0.121772	0.153378	0.148119	0.0997871	0.117548	0.119376	0.135205	0.196607	0.167148
Hf	0.408994	0.186415	0.19436	0.18503	0.259474	0.322788	0.20428	0.264089	0.245157	0.266892	0.516909	0.37976
Ta	0.00316743	0.00313581	0	0	0	0.00471103	0.000983012	0.0018951	0	0.0020888	0.00166474	2.5831e-05
Pb	0.0090037	0.0255431	0.0526026	0.0302777	0	0.0176397	0.0110795	0.00337369	0.00460858	0.114274	0.0374261	0.0154035
Th	0	0.0007342	0.00625283	0.000974054	0.00178451	0.00549269	0.0012026	0	0	0.00412494	0.0103976	0.0042672
U	0.000948423	0.00610452	0.00159814	0.00595673	0.00278098	0	0	0.00108192	0	0.00547591	0.0189685	0.0186952
S1 Table 1. Continued
Sample	E70R2W56-13	E70R2W56-14	E71R1W94-01	E71R1W94-02	E71R1W94-03	E71R1W94-04	E71R1W94-05	E71R1W94-06	E71R1W94-07	E71R1W94-08	E71R1W94-09	E71R1W94-10
Subunit	1a	1a	1a	1a	1a	1a	1a	1a	1a	1a	1a	1a
Depth (mbsf)	1466.16	1466.16	1471.04	1471.04	1471.04	1471.04	1471.04	1471.04	1471.04	1471.04	1471.04	1471.04
SiO2	52.1399	52.458	52.898	50.685	51.335	51.485	51.79	51.232	51.622	53.713	51.246	51.274
TiO2	0.3906	0.2746	0.375	0.699	0.369	0.577	0.463	0.395	0.506	0.255	0.471	0.57
Al2O3	2.9176	2.9632	2.649	4.303	4.279	4.305	4.167	4.288	3.801	1.965	4.352	4.368
Cr2O3	0.0449	0.7628	0.191	0.186	0.478	0.393	0.598	0.961	0.062	0.27	0.577	0.178
FeO	6.6378	4.7898	6.791	7.034	5.575	6.221	5.892	5.283	7.687	6.491	5.371	6.146
MnO	0.1711	0.1352	0.174	0.108	0.178	0.135	0.146	0.138	0.156	0.144	0.133	0.237
MgO	16.9788	17.7931	18.204	15.716	16.594	15.944	16.786	15.7	15.992	18.161	16.05	16.078
CaO	20.2352	20.4616	18.312	20.437	20.511	20.831	20.405	21.46	20.035	19.367	21.082	20.409
Na2O	0.1798	0.1669	0.195	0.21	0.203	0.163	0.2	0.178	0.187	0.14	0.209	0.176
Total	99.6957	99.8052	99.789	99.378	99.522	100.054	100.447	99.635	100.048	100.506	99.491	99.436
Si4+	1.91435	1.9136	1.93382	1.87484	1.88463	1.88892	1.88587	1.88662	1.89853	1.95177	1.88558	1.89011
Al3+(tet)	0.08565	0.0864	0.06618	0.12516	0.11537	0.11108	0.11413	0.11338	0.10147	0.04823	0.11442	0.10989
Al3+(oct)	0.04061	0.04101	0.04797	0.06245	0.06979	0.07509	0.06472	0.07274	0.0633	0.03593	0.07433	0.07991
Ti4+	0.01079	0.00753	0.01031	0.01945	0.01019	0.01592	0.01268	0.01094	0.014	0.00697	0.01303	0.0158
Cr3+	0.0013	0.022	0.00552	0.00544	0.01387	0.0114	0.01722	0.02798	0.0018	0.00776	0.01679	0.00519
Fe3+	0.03496	0.02013	0.00589	0.03344	0.02578	0.00435	0.02096	0.00349	0.02172	0.000476008	0.01214	0.00577
Fe2+	0.16886	0.12599	0.20174	0.18416	0.14539	0.18654	0.15847	0.15921	0.21472	0.19678	0.15314	0.18371
Mn2+	0.00532	0.00418	0.00539	0.00338	0.00554	0.0042	0.0045	0.0043	0.00486	0.00443	0.00415	0.0074
Mg2+	0.92928	0.96756	0.99205	0.8666	0.90814	0.87201	0.91118	0.86185	0.87675	0.98373	0.88034	0.88351
Ca2+	0.79607	0.79978	0.71731	0.81002	0.80685	0.81891	0.79615	0.84677	0.78952	0.75406	0.83117	0.80613
Na1+	0.0128	0.01181	0.01382	0.01506	0.01445	0.0116	0.01412	0.01271	0.01334	0.00986	0.01491	0.01258
100*Mg/(Mg+Fe2+)	84.6231	88.4788	83.1009	82.4736	86.1997	82.3778	85.1849	84.4074	80.3274	83.3309	85.1821	82.7861
Wo (%)	42.0266	42.2419	37.5339	43.5313	43.3702	43.6182	42.6708	45.3345	41.9738	38.978	44.5753	43.0315
En (%)	49.059	51.1035	51.9099	46.5717	48.8147	46.4462	48.8356	46.1417	46.6109	50.8501	47.2121	47.162
Fs (%)	8.91444	6.65461	10.5561	9.89703	7.81504	9.93557	8.4936	8.52382	11.4153	10.1719	8.21259	9.80653
Sc	134.043	116.293	114	106.339	121.723	146.82	119.497	123.502	133.362	121.746	134.108	127.068
Ti	2777.61	2332.74	3216.08	4225.61	4146.73	4641.28	4113.79	2319.86	4716.77	5183.82	4029.85	4489.83
V	352.02	299.013	345.39	400.984	403.508	444.584	394.123	280.497	468.493	514.437	403.262	430.92
Cr	840.116	1308.31	1095.68	237.592	868.892	1872.02	1348.39	6026.06	1476.99	489.764	2225.52	904.213
Mn	1589.41	1266.52	1474	1530.39	1307.27	1220.41	1250.98	1007.68	1570.22	2017.18	1069.92	1435.02
Co	57.9129	46.7565	47.5765	52.1705	46.6463	45.5464	43.6815	38.8566	52.4013	59.0337	39.7931	48.588
Ni	196.578	178.606	157.791	132.403	182.983	193.252	184.969	220.645	155.311	115.235	191.494	150.612
Rb	0.0470816	0.0456546	0.0090684	0.279961	0.166211	0.305117	0.00800277	0.0663662	1.46311	0.235982	0.0139754	0.0313355
Sr	11.1857	10.2726	6.16129	8.36532	7.84583	8.1858	6.90651	7.71187	62.103	7.14426	7.80115	7.05542
Y	13.5909	12.5518	14.9049	15.2838	15.844	14.9361	13.534	9.8988	16.3435	20.1866	13.2352	16.6499
Zr	6.91088	6.29559	8.43593	11.4706	12.2238	15.7885	11.3842	6.58743	14.0925	14.1866	12.7084	14.266
Nb	0.00645214	0.00777091	0.0155751	0.0130286	0.0205114	0.014082	0.00657473	0.0138263	0.00466639	0.00670472	0.0203236	0.00680809
Ba	0.0844322	0.101567	0.0830998	0.0690428	0.0235208	0.121062	0.13476	0.0694296	5.63278	0.113576	0.0689984	0.206056
La	0.139652	0.34658	0.1042	0.155506	0.135261	0.124562	0.136573	0.0925352	0.160597	0.199024	0.114294	0.159213
Ce	0.698682	1.64699	0.724117	0.87574	0.967895	0.828971	0.819809	0.585589	0.852829	1.0227	0.814133	0.802724
Pr	0.193948	0.324355	0.199882	0.199005	0.265182	0.232804	0.194271	0.149945	0.259269	0.25183	0.227411	0.241702
Nd	1.6595	2.36344	1.6803	1.67261	1.84891	2.02917	1.56495	1.32268	2.19135	2.54541	1.96141	2.17162
Sm	0.891321	1.10126	1.08217	1.20208	1.21092	1.22849	0.971392	0.834977	1.20117	1.50718	1.17404	1.3438
Eu	0.388216	0.35964	0.396773	0.393076	0.48079	0.424886	0.349435	0.272361	0.522571	0.523626	0.375609	0.43472
Gd	1.70605	1.80379	1.94389	1.83502	2.18888	1.96683	1.61409	1.36759	2.35386	2.55952	1.98599	1.90317
Tb	0.326235	0.312949	0.347814	0.416209	0.375219	0.39556	0.29415	0.263763	0.395336	0.445025	0.346329	0.405405
Dy	2.664	2.41395	2.88876	2.79219	2.89573	2.75416	2.43526	1.91255	2.9693	3.57484	2.39869	2.95609
Ho	0.561809	0.487173	0.604834	0.661305	0.697655	0.592783	0.544147	0.401436	0.668026	0.863198	0.577065	0.680429
Er	1.61198	1.50936	1.65023	1.82229	1.97542	1.92444	1.69097	1.13337	1.99787	2.34878	1.51321	1.80796
Tm	0.22723	0.18956	0.219073	0.241218	0.253694	0.279905	0.275291	0.195124	0.275109	0.297271	0.212662	0.262911
Yb	1.5329	1.3142	1.54789	1.50717	1.86421	1.65972	1.58516	1.05132	1.72584	2.13033	1.35994	1.58974
Lu	0.215239	0.181561	0.224062	0.257356	0.262936	0.23948	0.213449	0.142625	0.303151	0.324788	0.1813	0.256188
Hf	0.369232	0.385702	0.515405	0.575946	0.640317	0.81764	0.48964	0.355982	0.896765	0.70809	0.80372	0.803612
Ta	0.00272251	0.000143001	0.00135882	0.00145961	0.00595436	0.00152912	0.00143123	0.00149295	0	0	0.0029324	0.0103342
Pb	0.12471	0.049327	0.0340924	0.0559049	0	0.0246647	0	0.0263959	0.0804641	0.0431616	0.000118289	0
Th	0	0.0160861	0.00148573	0.00159843	0	0	0.00783309	0.00163259	0	0	0.00305379	0
U	0.016569	0.0150424	0.00133276	0.00572006	0.00730709	0.00451296	0.00703125	0.0027927	0.00888077	0.0042992	0.00289648	0
S1 Table 1. Continued
Sample	E71R1W94-11	E71R1W94-12	E71R1W94-13	E71R1W94-14	E71R1W94-15	E72R1W78-01	E72R1W78-02	E72R1W78-03	E72R1W78-04	E72R1W78-05	E72R1W78-06	E72R1W78-07	E72R1W78-08
Subunit	1a	1a	1a	1a	1a	1b	1b	1b	1b	1b	1b	1b	1b
Depth (mbsf)	1471.04	1471.04	1471.04	1471.04	1471.04	1475.48	1475.48	1475.48	1475.48	1475.48	1475.48	1475.48	1475.48
SiO2	51.335	51.377	51.688	50.823	52.21	50.6151	50.7656	51.239	51.5361	51.2794	50.5117	51.917	52.4772
TiO2	0.523	0.381	0.603	0.571	0.576	0.7417	0.8055	0.6802	0.5913	0.7477	0.9544	0.6133	0.6522
Al2O3	3.726	3.95	3.499	4.121	3.397	4.3048	4.8582	4.3693	3.6742	4.1832	3.3804	3.5208	4.9413
Cr2O3	0.088	1.061	0.079	0.208	0.123	0.3596	0.6221	0.5513	0.2226	0.298	0.0171	0.0792	0.0505
FeO	7.74	5.443	7.977	6.519	7.085	7.0021	6.6957	6.7457	7.3011	6.4836	10.1653	7.4274	7.8286
MnO	0.128	0.032	0.172	0.121	0.167	0.1769	0.1701	0.1753	0.1811	0.1634	0.2578	0.183	0.207
MgO	16.156	16.067	15.693	15.71	17.175	15.4864	15.4864	15.753	15.7167	15.9201	14.5628	16.3462	15.104
CaO	19.548	20.991	19.85	20.805	19.231	21.3649	21.2326	20.9882	21.0328	21.5695	20.4482	20.5132	20.2588
Na2O	0.214	0.23	0.194	0.172	0.17	0.2687	0.2666	0.2757	0.2959	0.2283	0.2988	0.2498	0.79
Total	99.458	99.532	99.755	99.05	100.134	100.32	100.903	100.778	100.552	100.873	100.597	100.85	102.31
Si4+	1.89751	1.89188	1.91111	1.88454	1.90983	1.85682	1.85129	1.86947	1.88628	1.86716	1.86828	1.89152	1.88582
Al3+(tet)	0.10249	0.10812	0.08889	0.11546	0.09017	0.14318	0.14871	0.13053	0.11372	0.13284	0.13172	0.10848	0.11418
Al3+(oct)	0.05984	0.06332	0.0636	0.06465	0.0563	0.04296	0.06012	0.05737	0.04479	0.04669	0.01566	0.04271	0.09512
Ti4+	0.01454	0.01055	0.01677	0.01592	0.01585	0.02046	0.02209	0.01866	0.01628	0.02047	0.02655	0.0168	0.01763
Cr3+	0.00257	0.03089	0.00231	0.0061	0.00356	0.01043	0.01794	0.0159	0.00644	0.00858	0.000500075	0.00228	0.00143
Fe3+	0.02634	0.00923	0.00336	0.02524	0.01067	0.06798	0.04532	0.03943	0.05094	0.05274	0.0839	0.04753	0.03742
Fe2+	0.21293	0.1584	0.24331	0.17693	0.20608	0.14685	0.15889	0.16641	0.17255	0.1447	0.23055	0.17879	0.19786
Mn2+	0.00401	0.000998126	0.00539	0.0038	0.00517	0.0055	0.00525	0.00542	0.00561	0.00504	0.00808	0.00565	0.0063
Mg2+	0.89021	0.88196	0.86495	0.86838	0.93654	0.84689	0.84187	0.85678	0.85752	0.86412	0.80294	0.88778	0.80911
Ca2+	0.77422	0.82823	0.78641	0.82662	0.75377	0.83982	0.82967	0.82052	0.82487	0.84154	0.8104	0.80081	0.78008
Na1+	0.01534	0.01642	0.01391	0.01237	0.01206	0.01911	0.01885	0.0195	0.021	0.01612	0.02143	0.01765	0.05505
100*Mg/(Mg+Fe2+)	80.6978	84.7745	78.0458	83.0739	81.9643	85.2228	84.123	83.7363	83.2489	85.6563	77.6921	83.237	80.3513
Wo (%)	41.24	44.324	41.5065	44.1588	39.7475	45.8026	45.3263	44.5036	44.4688	45.4796	43.9505	42.884	43.6516
En (%)	47.4182	47.1993	45.6517	46.3897	49.3856	46.1886	45.9931	46.4706	46.2291	46.7001	43.546	47.5416	45.2766
Fs (%)	11.3419	8.47677	12.8418	9.45152	10.8668	8.00886	8.68053	9.02577	9.30211	7.82023	12.5035	9.57432	11.0717
Sc	125.66	110.395	129.753	141.045	130.01	210.715	200.646	188.973	127.355	194.635	131.002	179.802	138.691
Ti	3900.21	2281.49	4150.52	5321.11	3880.71	6638.16	5561.76	6191.11	4486.68	5894.64	6918.94	5640.71	4717.51
V	419.28	249.812	436.589	503.863	381.811	594.95	558.242	565.853	430.971	555.863	600.964	514.776	449.233
Cr	359.457	6232.45	656.42	455.448	1307.72	3478.61	3006.58	3123.46	564.94	2731.45	207.384	2924.12	1139.75
Mn	1643.91	988.283	1448.21	1634.27	1166.58	1269.25	1393.42	1263.42	2012.6	1293.97	2086.97	1135.67	1197.24
Co	52.6587	38.6758	50.0792	56.5983	43.1385	45.2199	50.5811	46.4094	61.4755	48.6876	61.3468	43.6923	44.1618
Ni	126.05	224.05	135.606	114.471	169.785	136.916	150.132	142.83	141.595	153.554	114.417	138.294	139.711
Rb	0	0.784729	0.096333	0.00974027	0.0720125	0	0.0130772	0.00961034	0.0171092	0	0	0.00586894	0.00264399
Sr	7.36732	9.08921	7.25759	7.86154	7.44516	8.152	7.86145	7.99966	7.48849	8.11498	9.05466	20.975	8.47857
Y	21.0109	8.27527	14.9366	17.5352	13.6494	20.3038	21.715	22.135	19.9154	21.8049	28.815	19.4058	19.4837
Zr	10.1794	5.61383	13.2572	15.0917	12.7311	25.3558	19.6046	23.1015	11.2272	21.2076	21.3422	23.6577	17.9282
Nb	0.0130242	0.00300795	0.00340611	0.0238519	0.0220696	0.014778	0.0111911	0.0232154	0	0.0161984	0.00286733	0.0216899	0
Ba	0	0.64979	0.431597	0	0.0208836	0.0114705	0.0487807	0.00773436	0.0777999	0	0.0486811	0.154411	0.0676632
La	0.245571	0.090763	0.109177	0.146966	0.154666	0.185863	0.14848	0.153781	0.119649	0.175435	0.22776	0.162763	0.17305
Ce	1.14629	0.515517	0.839709	0.970485	0.796769	1.12504	0.951824	1.04943	0.837475	1.03695	1.39257	1.05939	1.05976
Pr	0.339218	0.127444	0.209012	0.260408	0.219548	0.309384	0.265056	0.288858	0.224812	0.318328	0.418033	0.278829	0.305139
Nd	2.52218	1.25748	2.02176	2.51848	1.93902	2.66434	2.45838	2.66514	2.06947	2.69359	3.56234	2.28751	2.61007
Sm	1.70682	0.75014	1.0197	1.31571	0.913721	1.4526	1.31882	1.59337	1.31864	1.51222	2.10279	1.46706	1.53872
Eu	0.484332	0.262157	0.378479	0.405027	0.463241	0.621863	0.59607	0.604249	0.524439	0.592348	0.73793	0.547428	0.599902
Gd	2.37566	1.21057	2.00823	1.96394	1.79033	2.66915	2.88089	2.81534	2.44003	2.91189	3.57546	2.64415	2.57267
Tb	0.555148	0.20377	0.355649	0.495297	0.337062	0.518513	0.549709	0.542439	0.489168	0.545447	0.727017	0.473354	0.505192
Dy	3.74967	1.70026	2.97483	3.19975	2.59203	3.78843	4.07265	3.88762	3.74881	4.05495	5.34064	3.58239	3.67764
Ho	0.890129	0.332728	0.606755	0.741562	0.564419	0.903028	0.869695	0.855328	0.862022	0.826047	1.14471	0.785343	0.799783
Er	2.41964	1.0488	1.86785	2.0131	1.6893	2.20791	2.6143	2.83012	2.48435	2.63025	3.45188	2.29202	2.39706
Tm	0.346976	0.139559	0.258363	0.272749	0.237304	0.326961	0.33673	0.336925	0.35017	0.392713	0.467797	0.292395	0.35818
Yb	2.27877	0.912795	1.74792	2.06646	1.36656	2.10338	2.46119	2.26478	2.22732	2.69779	2.82829	2.06389	2.00124
Lu	0.326132	0.112551	0.256165	0.27058	0.204776	0.377317	0.366163	0.357831	0.345655	0.377946	0.45936	0.31492	0.292382
Hf	0.519754	0.243681	0.737049	0.960389	0.696464	1.38691	1.09294	1.25357	0.563151	1.29658	1.07001	1.27609	1.01674
Ta	0.00551312	0.00146278	0.00588861	0	0.0054868	0.00261977	0.00106777	0	0	0.00603138	0.00345678	0.00133465	0.00555711
Pb	0	0.0579136	0.107918	0.0173318	0	0.00116578	0.00354592	0.166337	0	0.013419	0.000207811	0.0489296	0.0206487
Th	0	0	0.00160572	0	0	0	0	7.66295e-05	0	0.0042587	0	0.00469568	0.00502584
U	0	0	0.00289825	0.00146435	0	0.00108783	0	0.0025169	0.000865694	0.00028835	0	0	0.000183342
S1 Table 1. Continued
Sample	E72R1W78-09	E72R1W78-10	E72R1W78-11	E72R1W78-12	E72R1W78-13	E72R1W78-14	E72R1W78-15	E73R2W61-01	E73R2W61-02	E73R2W61-04	E73R2W61-06	E74R2W15-01	E74R2W15-02
Subunit	1b	1b	1b	1b	1b	1b	1b	1b	1b	1b	1b	1c	1c
Depth (mbsf)	1475.48	1475.48	1475.48	1475.48	1475.48	1475.48	1475.48	1486.2	1486.2	1486.2	1486.2	1495.63	1495.63
SiO2	50.4727	50.2758	51.2498	51.2502	50.9385	51.712	49.7509	49.722	48.5556	49.2877	47.9931	52.027	52.721
TiO2	0.9811	0.8228	0.5763	0.6822	0.8395	0.5383	0.8389	0.988	1.0116	1.0952	0.8112	0.473	0.508
Al2O3	3.5731	4.8059	4.0203	4.482	3.4295	3.1774	5.3818	5.303	4.5844	4.9886	5.0961	2.649	2.586
Cr2O3	0.0349	0.3037	0.2166	0.1282	0.0072	0.1245	0.6828	0.309	0.1334	0.0814	0.2458	0.069	0.215
FeO	10.5801	6.1216	6.8632	6.1712	10.2119	7.3756	6.0128	7.909	12.9849	10.3613	8.9634	8.782	6.368
MnO	0.2827	0.1192	0.1666	0.129	0.2497	0.1668	0.146	0.195	0.3045	0.2173	0.204	0.247	0.162
MgO	15.1597	15.0844	16.5192	15.5981	14.7885	16.2678	15.4215	13.749	12.4937	13.185	13.4317	17.016	16.587
CaO	19.1067	22.6593	19.8658	21.8731	20.1881	21.1241	21.8689	21.545	18.8881	21.4431	20.9779	17.516	20.817
Na2O	0.2864	0.2675	0.28	0.2283	0.3122	0.2617	0.2486	0.296	0.3996	0.2966	0.2798	0.218	0.178
Total	100.477	100.46	99.7578	100.542	100.965	100.748	100.352	100.016	99.3558	100.956	98.003	98.997	100.142
Si4+	1.86652	1.83984	1.88196	1.8713	1.87529	1.88622	1.82036	1.84335	1.83956	1.82359	1.81936	1.93283	1.93186
Al3+(tet)	0.13348	0.16016	0.11804	0.1287	0.12471	0.11378	0.17964	0.15665	0.16044	0.17641	0.18064	0.06717	0.06814
Al3+(oct)	0.02227	0.04714	0.05597	0.0642	0.02411	0.02283	0.05247	0.07508	0.04428	0.04114	0.04707	0.04882	0.04356
Ti4+	0.02729	0.02264	0.01592	0.01873	0.02324	0.01477	0.02308	0.02755	0.02882	0.03047	0.02313	0.01322	0.014
Cr3+	0.00102	0.00879	0.00629	0.0037	0.000209577	0.00359	0.01975	0.00906	0.004	0.00238	0.00737	0.00203	0.00623
Fe3+	0.07616	0.07792	0.04388	0.0395	0.07619	0.07633	0.07889	0.03869	0.08387	0.09322	0.10052	0.0056	0.003
Fe2+	0.25106	0.10943	0.16689	0.14895	0.23822	0.14866	0.10511	0.20653	0.32755	0.22739	0.18366	0.26726	0.19215
Mn2+	0.00886	0.00369	0.00518	0.00399	0.00779	0.00515	0.00453	0.00612	0.00977	0.00681	0.00655	0.00777	0.00503
Mg2+	0.83571	0.82289	0.90427	0.849	0.81159	0.88454	0.84115	0.75984	0.70559	0.72721	0.75903	0.94235	0.90605
Ca2+	0.7571	0.88851	0.78166	0.85576	0.79636	0.82561	0.85739	0.85586	0.76676	0.8501	0.85211	0.69726	0.81734
Na1+	0.02054	0.01898	0.01994	0.01616	0.02229	0.01851	0.01764	0.02128	0.02935	0.02128	0.02057	0.0157	0.01265
100*Mg/(Mg+Fe2+)	76.8984	88.2621	84.4195	85.0742	77.3081	85.6114	88.8922	78.6283	68.2957	76.1795	80.5175	77.9053	82.5032
Wo (%)	41.0605	48.797	42.1876	46.1646	43.1359	44.4158	47.5364	46.9678	42.5999	47.1049	47.4766	36.5657	42.6691
En (%)	45.3236	45.1928	48.8049	45.8	43.9605	47.5864	46.636	41.6984	39.2018	40.2952	42.2906	49.4188	47.2997
Fs (%)	13.616	6.01017	9.00745	8.03539	12.9035	7.99779	5.82756	11.3338	18.1983	12.5999	10.2329	14.0155	10.0311
Sc	112.746	180.573	143.598	178.97	132.358	151.624	123.391	137.583	126.002	217.603	184.867	122.54	156.713
Ti	5674	6478.83	5262.88	6687.95	4862.7	5245.64	5439.47	6730.99	7482.13	11797.2	8193.11	3911.54	4969.8
V	482.638	562.43	483.349	579.443	455.815	489.757	468.145	556.236	696.031	1020.08	738.95	398.647	537.466
Cr	211.66	2899.67	697.343	2271.28	787.009	1920.59	486.933	1300.28	410.224	936.999	1199.36	46.9692	112.457
Mn	1520.23	1264.55	1415.42	1200.27	1307.71	1132.21	1177.56	1202.94	2233.05	2908.25	1793.17	2742.91	1675.56
Co	48.849	47.68	48.3803	45.8941	47.2493	44.3859	46.1847	43.9607	67.1746	73.3613	58.1214	79.1502	56.0634
Ni	116.43	157.507	127.079	150.589	129.615	150.926	143.93	100.082	77.3209	40.6037	93.6572	118.918	110.723
Rb	0	0.104354	0	0.0112013	0.155392	0.0100637	0.0199538	0.360787	3.94535	0.100257	0.222303	0.0102277	0.0244266
Sr	7.45202	22.0848	11.5256	8.40429	25.307	8.73795	11.697	44.1465	14.9328	11.0681	11.4525	4.08989	7.86679
Y	21.8221	23.3048	19.9971	21.5149	18.2407	19.2279	18.0175	20.1469	29.0574	40.6594	34.0414	17.8227	23.0376
Zr	18.3837	26.4254	17.645	25.8437	15.1484	19.8869	20.4717	34.7532	32.4204	48.3319	35.7736	6.0753	12.1082
Nb	0.0115645	0.0260383	0.00114699	0.0162937	0.0109248	0.00219766	0.00762673	0.0488574	0.0145906	0.0353512	0.0342565	0.00335852	0.00968905
Ba	0	0.398146	0.0805292	0.0504597	0.127791	0.0199107	0.183845	1.07059	1.97846	0.0736963	14.1143	0.0683408	0.196372
La	0.176079	0.19475	0.153581	0.194336	0.139311	0.156657	0.172138	0.257048	0.2565	0.417989	0.668047	0.0983974	0.173318
Ce	1.02562	1.24842	0.978113	1.16381	0.899293	1.00486	0.961629	1.42497	1.67315	2.57252	3.00371	0.581192	1.1027
Pr	0.302704	0.388546	0.280775	0.320279	0.269864	0.304305	0.271567	0.373634	0.47445	0.667443	0.663582	0.145027	0.272368
Nd	2.59051	2.9219	2.35632	2.82847	2.18413	2.38441	2.46068	2.966	3.87517	5.78134	4.93572	1.46914	2.0746
Sm	1.61587	1.85329	1.50993	1.64278	1.35177	1.41101	1.33236	1.6414	2.00314	3.12191	2.63424	1.15519	1.62377
Eu	0.594965	0.637892	0.535071	0.609632	0.516556	0.533528	0.515219	0.592387	0.82656	1.20631	0.825365	0.416736	0.550931
Gd	2.74569	2.89557	2.51926	2.91712	2.35325	2.39434	2.26993	2.68475	3.8529	5.25058	4.40765	2.18213	3.07654
Tb	0.533218	0.576863	0.47032	0.497436	0.479926	0.476717	0.451885	0.480447	0.649688	0.998804	0.860314	0.404453	0.508515
Dy	3.95299	4.08156	3.96798	3.99658	3.31896	3.58507	3.3247	3.46053	5.43021	7.34742	5.98669	3.2596	4.03897
Ho	0.887446	0.906858	0.800531	0.866355	0.769981	0.740823	0.690012	0.8139	1.20603	1.61923	1.38796	0.689615	0.914295
Er	2.46384	2.5659	2.30641	2.52445	2.18081	2.13944	2.20628	2.33148	3.43835	4.82576	4.3064	1.99677	2.82425
Tm	0.342642	0.397187	0.346885	0.342593	0.321112	0.31793	0.296817	0.322149	0.54505	0.72244	0.591633	0.322019	0.399897
Yb	2.49846	2.74284	2.06643	2.41148	2.06138	2.07261	1.6977	2.22249	3.29692	4.59367	3.84805	2.63543	2.79658
Lu	0.375917	0.389699	0.336804	0.354272	0.330273	0.278995	0.285156	0.339944	0.484635	0.756889	0.62347	0.371977	0.371214
Hf	0.973354	1.25707	1.06558	1.42827	0.836525	1.14169	1.15345	1.31424	1.59495	2.17956	1.66998	0.369336	0.718462
Ta	0.00133092	0.000171684	0	0.00729484	0	0.00557008	0	0.00848342	0	0.0112589	0.00362462	0	0.00281084
Pb	0.0173747	0.058844	0.00985281	0.0261016	0.0198091	0.0234525	0.027456	0.105677	0.169009	0.0757193	1.12949	0	0.0127538
Th	0.00178569	0.00468041	0	0.00115564	0.00955779	0.00159017	0	0.0041399	0.00350617	0.00283638	0.0161708	0	0.00155247
U	0	0.0022878	0.00261164	0.00631985	0.00174648	0.000362521	0	0.0218564	0.0115134	0.00365728	0.0189324	0	0.00139843
S1 Table 1. Continued
Sample	E74R2W15-01	E74R2W15-02	E74R2W15-03	E74R2W15-04	E74R2W15-05	E74R2W15-06	E74R2W15-07	E74R2W15-08	E74R2W15-09	E75R1W26-29-01	E75R1W26-29-02	E75R1W26-29-03	E75R1W26-29-04
Subunit	1c	1c	1c	1c	1c	1c	1c	1c	1c	1c	1c	1c	1c
Depth (mbsf)	1495.63	1495.63	1495.63	1495.63	1495.63	1495.63	1495.63	1495.63	1495.63	1504.06	1504.06	1504.06	1504.06
SiO2	52.027	52.721	52.258	53.827	51.143	52.74	53.456	52.013	52.081	51.465	49.642	50.923	50.307
TiO2	0.473	0.508	0.556	0.343	0.678	0.313	0.278	0.627	0.535	0.609	0.884	0.653	1.106
Al2O3	2.649	2.586	2.838	1.527	2.863	1.874	1.289	2.836	2.892	2.707	4.753	3.511	4.127
Cr2O3	0.069	0.215	0.062	0.052	0.049	0.176	0.002	0.055	0.025	0.15	0.348	0.159	0.364
FeO	8.782	6.368	8.144	8.323	11.421	6.553	8.455	10.886	8.081	9.234	8.812	7.752	8.548
MnO	0.247	0.162	0.262	0.316	0.28	0.141	0.199	0.314	0.228	0.323	0.232	0.201	0.254
MgO	17.016	16.587	16.18	17.619	15.655	17.483	17.455	16.388	15.58	15.144	13.91	14.616	14.411
CaO	17.516	20.817	19.593	18.739	16.935	19.84	18.835	16.808	20.522	19.428	19.864	20.818	20.036
Na2O	0.218	0.178	0.201	0.173	0.241	0.218	0.149	0.223	0.202	0.273	0.278	0.262	0.305
Total	98.997	100.142	100.094	100.919	99.265	99.338	100.118	100.15	100.146	99.333	98.723	98.895	99.458
Si4+	1.93283	1.93186	1.92467	1.96032	1.91537	1.94135	1.96319	1.9244	1.92058	1.92123	1.86783	1.90483	1.87717
Al3+(tet)	0.06717	0.06814	0.07533	0.03968	0.08463	0.05865	0.03681	0.0756	0.07942	0.07877	0.13217	0.09517	0.12283
Al3+(oct)	0.04882	0.04356	0.04788	0.02586	0.04176	0.02266	0.01899	0.04807	0.04628	0.04034	0.07862	0.05963	0.05868
Ti4+	0.01322	0.014	0.0154	0.00939	0.0191	0.00866	0.00768	0.01745	0.01484	0.0171	0.02501	0.01837	0.03104
Cr3+	0.00203	0.00623	0.00181	0.0015	0.00145	0.00512	5.80744e-05	0.00161	0.000728921	0.00443	0.01035	0.0047	0.01074
Fe3+	0.0056	0.003	0.0092	0.00575	0.02072	0.02909	0.01301	0.00702	0.01718	0.01957	0.01345	0.01309	0.0134
Fe2+	0.26726	0.19215	0.24165	0.24775	0.337	0.17264	0.24668	0.32982	0.23204	0.26872	0.26384	0.22942	0.25335
Mn2+	0.00777	0.00503	0.00817	0.00975	0.00888	0.0044	0.00619	0.00984	0.00712	0.01021	0.00739	0.00637	0.00803
Mg2+	0.94235	0.90605	0.88833	0.95653	0.874	0.95933	0.9556	0.90385	0.85646	0.84275	0.7802	0.81501	0.8016
Ca2+	0.69726	0.81734	0.77321	0.73125	0.67959	0.78253	0.74118	0.66634	0.8109	0.77712	0.80085	0.8344	0.80109
Na1+	0.0157	0.01265	0.01435	0.01222	0.0175	0.01556	0.01061	0.016	0.01444	0.01976	0.02028	0.019	0.02207
100*Mg/(Mg+Fe2+)	77.9053	82.5032	78.6147	79.4275	72.1718	84.7487	79.4823	73.2651	78.6826	75.823	74.7289	78.034	75.9846
Wo (%)	36.5657	42.6691	40.6272	37.7804	35.946	40.8737	38.1374	35.0702	42.6922	41.1483	43.409	44.4109	43.1611
En (%)	49.4188	47.2997	46.6756	49.4193	46.2289	50.1088	49.17	47.5711	45.0912	44.623	42.2897	43.3784	43.1887
Fs (%)	14.0155	10.0311	12.6972	12.8002	17.8251	9.01747	12.6926	17.3588	12.2166	14.2287	14.3013	12.2107	13.6502
Sc	122.54	156.713	136.319	100.971	121.956	99.3602	99.8622	125.203	160.075	142.491	164.897	145.091	122.476
Ti	3911.54	4969.8	3730.92	2432.2	5014.07	2337.66	2430.95	4593.17	5587.54	5828.87	6815.79	5922.52	8008.31
V	398.647	537.466	406.288	275.051	476.806	269.379	278.956	464.865	569.159	540.034	647.33	577.276	625.696
Cr	46.9692	112.457	626.702	276.714	17.6749	1094	437.761	57.7893	62.6648	1149.69	1075.3	808.025	132.612
Mn	2742.91	1675.56	1497.78	1648.75	2458.43	1370.06	1487.42	2094.58	1855.59	1873.03	2199.02	1820.72	4613.1
Co	79.1502	56.0634	48.8162	51.8702	70.343	47.3777	48.9522	61.1496	61.546	55.3077	63.5651	58.2594	88.8644
Ni	118.918	110.723	126.952	122.79	94.2863	150.446	130.115	101.726	103.181	87.1491	82.2136	91.7788	59.896
Rb	0.0102277	0.0244266	0.00475184	0	0.004161	0	0.0132804	0	0	0.0696311	0.0359082	0.0105653	1.14861
Sr	4.08989	7.86679	6.03805	4.67148	4.42019	5.2278	5.27362	4.37028	7.13974	9.08852	9.45805	7.34812	23.7959
Y	17.8227	23.0376	14.3485	10.2611	20.1256	9.03412	9.99879	19.4121	21.6787	27.9871	24.4528	20.7723	74.3401
Zr	6.0753	12.1082	6.76413	3.23313	9.29273	2.87034	3.77032	9.22728	12.5759	28.6345	17.7975	14.9416	71.5736
Nb	0.00335852	0.00968905	0.0125776	0.00579822	0.00305093	0	0.00291828	0.00311182	0.00680814	0.0558099	0.0167313	0.017293	0.241548
Ba	0.0683408	0.196372	0.0212308	0	0	0	0	0.209631	0.0205295	0.068051	0.455214	0.0238358	2.6109
La	0.0983974	0.173318	0.0875367	0.0570617	0.0851915	0.0510925	0.0655025	0.103355	0.186781	0.801677	0.213989	0.135509	2.56948
Ce	0.581192	1.1027	0.550861	0.340604	0.672564	0.412359	0.384855	0.673574	1.17175	3.18248	1.18198	1.01837	10.9609
Pr	0.145027	0.272368	0.183565	0.121235	0.192449	0.0979545	0.11074	0.19344	0.303577	0.562395	0.286352	0.321955	2.10004
Nd	1.46914	2.0746	1.73326	0.977295	1.7655	0.889115	0.983903	1.47267	2.94403	4.05979	2.74424	2.46142	14.1319
Sm	1.15519	1.62377	0.943981	0.562623	1.40891	0.576085	0.580247	1.30599	1.49218	1.77145	1.78713	1.30629	6.21648
Eu	0.416736	0.550931	0.332133	0.299955	0.375105	0.236115	0.315214	0.457615	0.518615	0.641499	0.617577	0.592076	1.72861
Gd	2.18213	3.07654	1.71162	1.08496	2.3767	1.01105	1.21119	2.30806	2.95036	3.44108	3.21641	2.77438	9.51366
Tb	0.404453	0.508515	0.321279	0.264698	0.496616	0.211486	0.260266	0.43565	0.515505	0.681931	0.505296	0.465014	1.83486
Dy	3.2596	4.03897	2.58054	1.86369	3.50817	1.54845	2.07674	3.42077	3.736	4.92977	4.22529	3.73627	14.6041
Ho	0.689615	0.914295	0.566694	0.408936	0.793462	0.337222	0.377343	0.726536	0.906927	1.09075	0.954897	0.874098	2.8426
Er	1.99677	2.82425	1.78725	1.27998	2.50478	0.990651	1.19172	2.1703	2.47761	3.14174	2.90932	2.59752	8.43273
Tm	0.322019	0.399897	0.244041	0.185485	0.372771	0.138033	0.190742	0.372699	0.388601	0.450311	0.373196	0.324196	1.32056
Yb	2.63543	2.79658	1.58026	1.19969	2.34499	1.12539	1.0974	2.12453	2.33007	3.18446	2.83525	2.33852	8.59289
Lu	0.371977	0.371214	0.209928	0.168878	0.349897	0.13974	0.184993	0.35463	0.36272	0.468911	0.433636	0.343187	1.34231
Hf	0.369336	0.718462	0.427582	0.200734	0.506561	0.202358	0.236744	0.543993	0.830315	1.14415	1.02886	0.698098	2.45506
Ta	0	0.00281084	0	0	0	0	0.00127397	0	0	0.0111942	0.00144595	0.00597454	0.0410614
Pb	0	0.0127538	0	0	0	0	0.0225348	0.0495644	0	0.0147433	0	0.0337837	0.113755
Th	0	0.00155247	0	0	0	0	0	0	0.00163899	0.0219649	0.00161068	0	0.0724534
U	0	0.00139843	0	0	0	0	0	0	0	0.00701416	0	0	0.0129381
S1 Table 1. Continued
Sample	E75R1W26-29-05	E76R2W23-01	E76R2W23-02	E76R2W23-03	E76R2W23-04	E76R2W23-05	E76R2W23-06	E76R2W23-07	E76R2W23-08	E76R2W23-09	E76R2W23-10	E76R2W23-11	E76R2W23-12
Subunit	1c	1c	1c	1c	1c	1c	1c	1c	1c	1c	1c	1c	1c
Depth (mbsf)	1504.06	1508.44	1508.44	1508.44	1508.44	1508.44	1508.44	1508.44	1508.44	1508.44	1508.44	1508.44	1508.44
SiO2	49.972	50.226	50.945	50.538	51.182	51.392	51.421	50.818	51.027	50.542	51.413	50.46	51.137
TiO2	1.006	0.807	0.652	0.646	0.716	0.614	0.667	0.647	0.802	0.791	0.57	0.804	0.664
Al2O3	4.19	4.729	3.147	4.318	3.155	3.431	3.205	4.369	3.659	3.338	3.096	3.842	3.068
Cr2O3	0.325	0.378	0.055	0.242	0.08	0.185	0.103	0.194	0.133	0.147	0.122	0.167	0.03
FeO	8.941	7.285	9.97	7.18	10.025	8.29	9.87	7.269	9.676	9.846	9.12	9.365	12.338
MnO	0.235	0.209	0.331	0.193	0.276	0.075	0.26	0.167	0.25	0.264	0.207	0.208	0.291
MgO	13.912	14.187	14.466	14.641	14.834	14.523	14.964	14.898	14.539	14.869	14.877	15.166	15.279
CaO	20.315	21.194	19.734	21.424	19.486	20.793	18.972	20.704	19.474	19.292	19.748	19.105	17.19
Na2O	0.278	0.239	0.269	0.238	0.222	0.249	0.249	0.267	0.247	0.246	0.246	0.246	0.261
Total	99.174	99.254	99.569	99.42	99.976	99.552	99.711	99.333	99.807	99.335	99.399	99.363	100.258
Si4+	1.87431	1.87241	1.90381	1.87672	1.90368	1.9131	1.91557	1.88671	1.90096	1.89014	1.91832	1.88126	1.90201
Al3+(tet)	0.12569	0.12759	0.09619	0.12328	0.09632	0.0869	0.08443	0.11329	0.09904	0.10986	0.08168	0.11874	0.09799
Al3+(oct)	0.05955	0.08021	0.04243	0.06572	0.042	0.06364	0.0563	0.0779	0.06163	0.03728	0.05448	0.0501	0.03651
Ti4+	0.02838	0.02263	0.01832	0.01804	0.02003	0.01719	0.01869	0.01807	0.02247	0.02225	0.01599	0.02254	0.01857
Cr3+	0.00964	0.01114	0.00163	0.00711	0.00235	0.00545	0.00303	0.00569	0.00392	0.00435	0.0036	0.00492	0.000882242
Fe3+	0.01997	0.00826	0.03497	0.03151	0.02792	0.0014	0.00571	0.01279	0.00639	0.04158	0.00941	0.03641	0.04227
Fe2+	0.2605	0.21887	0.27662	0.19147	0.28392	0.25669	0.3018	0.21292	0.29508	0.26637	0.27518	0.25559	0.34153
Mn2+	0.00747	0.0066	0.01048	0.00607	0.0087	0.00236	0.0082	0.00525	0.00789	0.00836	0.00654	0.00657	0.00917
Mg2+	0.77785	0.78841	0.80586	0.81048	0.82248	0.80591	0.83099	0.82453	0.80742	0.82892	0.82747	0.84287	0.84715
Ca2+	0.81644	0.8466	0.79019	0.85246	0.77659	0.82938	0.7573	0.82364	0.77736	0.77306	0.78952	0.76321	0.68509
Na1+	0.02022	0.01728	0.01949	0.01714	0.01601	0.01797	0.01799	0.01922	0.01784	0.01784	0.0178	0.01778	0.01882
100*Mg/(Mg+Fe2+)	74.9121	78.2712	74.4457	80.8903	74.3384	75.8432	73.3578	79.4766	73.2354	75.6804	75.0438	76.732	71.2681
Wo (%)	44.0182	45.6664	42.1958	45.9694	41.2425	43.8366	40.0668	44.2559	41.3521	41.3767	41.7257	40.9959	36.5621
En (%)	41.9373	42.5275	43.0326	43.7053	43.6793	42.5963	43.9657	44.3037	42.9509	44.3665	43.7312	45.2751	45.2112
Fs (%)	14.0445	11.8061	14.7715	10.3253	15.0781	13.5671	15.9675	11.4405	15.697	14.2569	14.5431	13.7289	18.2267
Sc	174.557	156.248	142.285	137.362	154.568	131.263	128.517	143.354	152.007	146.434	159.831	133.525	126.121
Ti	5958.53	6900.92	6282.39	5735.49	6046.76	5253.52	5010.31	5248.89	7255.63	5781.9	5460.04	5612.84	6519.53
V	591.156	640.963	612.639	541.065	596.527	521.261	513.901	531.273	691.763	541.895	545.021	536.728	578.213
Cr	1681.54	822.504	361.364	1657.41	574.565	604.744	551.784	1794.31	161.633	1327.48	1575.55	498.755	153.722
Mn	2069.24	2273.62	2242.1	1505.46	2094.51	1818.62	2015.63	1419.84	2581.61	1602.68	1863.94	2269.31	1984.35
Co	62.6181	69.368	67.3424	52.6394	64.2267	60.328	62.8135	49.2328	74.9392	51.704	58.8484	68.6788	61.226
Ni	90.7836	88.5969	70.2401	89.1353	77.157	88.5078	72.9049	103.128	66.4212	85.8876	81.9589	72.6129	56.1254
Rb	0.0840117	0.0109603	0	0	0.0246709	0.00945455	0	0	0.00404404	0	0.00445926	0.00492659	0.0170864
Sr	7.26091	7.25473	6.85866	6.99514	6.73832	7.44785	6.4196	6.80681	7.34707	6.52636	6.60252	5.73094	6.78107
Y	21.4957	27.8571	26.9648	19.4158	25.8798	20.4569	22.0353	21.5888	34.5192	21.3119	21.2131	23.5547	26.7337
Zr	15.8206	20.3631	16.2686	16.4684	16.0016	12.9897	11.6029	17.4731	19.1209	18.2572	14.6258	13.3244	19.0285
Nb	0.0102906	0.0144309	0	0	0.00649114	0.00655667	0.00625402	0.0234686	0.0100529	0.00627378	0.00653136	0.00970183	0.0028771
Ba	0.0469112	0.0496179	0	0	0.044318	0	0	0.0457317	0.0685384	0	0	0	0.0978299
La	0.235027	0.234272	0.213713	0.152748	0.205807	0.174357	0.149253	0.210317	0.308227	0.196789	0.164787	0.200675	0.237393
Ce	1.15672	1.52492	1.18434	0.96191	1.22604	1.0935	0.913493	1.21933	1.67072	1.1591	0.943527	0.963024	1.45159
Pr	0.259585	0.435012	0.393439	0.25911	0.31063	0.306547	0.264745	0.278315	0.513754	0.329998	0.283724	0.265066	0.404809
Nd	2.51748	3.18033	2.91907	1.94642	2.70476	2.43869	2.14717	2.67355	3.78547	2.71878	2.51064	2.20022	3.42882
Sm	1.49502	1.81722	2.04116	1.24719	1.9741	1.39863	1.36986	1.54394	2.70852	1.24399	1.58471	1.54735	1.71951
Eu	0.583074	0.740015	0.730707	0.629868	0.766467	0.525312	0.494432	0.607811	0.854673	0.641229	0.533313	0.538308	0.678849
Gd	3.10635	3.03495	3.36589	2.24268	3.44849	2.76858	2.71512	2.64828	4.20967	2.85079	2.44407	2.87251	3.5733
Tb	0.514189	0.689481	0.598449	0.473961	0.627457	0.560186	0.503549	0.541652	0.865402	0.57158	0.514082	0.575191	0.680346
Dy	3.84844	5.04375	4.7412	3.65149	4.94306	3.93128	3.95491	4.15781	6.39045	3.97904	3.65388	4.47774	5.08796
Ho	0.883872	1.07676	0.975604	0.762692	1.08411	0.8497	0.963173	0.858514	1.36528	0.835649	0.832523	0.92968	1.11076
Er	2.72536	3.40859	3.26097	2.23542	3.08833	2.39492	2.75287	2.34113	4.15361	2.45402	2.61716	2.74856	3.42522
Tm	0.366738	0.509807	0.450677	0.330406	0.49272	0.338669	0.393292	0.38644	0.55183	0.367449	0.375099	0.41589	0.447772
Yb	2.61284	3.15801	2.93573	1.93567	3.1079	2.48248	2.30617	2.40634	3.56123	2.63462	2.49973	2.72798	3.10825
Lu	0.378811	0.47315	0.423091	0.351798	0.411113	0.336508	0.364642	0.340793	0.585597	0.347978	0.375343	0.437085	0.402735
Hf	0.916019	1.14182	0.878503	0.906981	0.985418	0.78282	0.586865	0.840103	0.980971	1.11971	0.915526	0.785322	1.05699
Ta	0.00444565	0.0047731	0.00290433	0.00299203	0.00429058	0.0028887	0	0.00147652	0.00295095	0.0013804	0.00143679	0.00426762	0
Pb	0	0	0	0	0.027078	0.0225458	0	0.0341932	0.0556698	0	0.0153634	0.00080499	0
Th	0	0.00879968	0	0	0	0.00159771	0	0.00653219	0.00489532	0	0	0.00157263	0.00139832
U	0.00146855	0	0	0	0	0	0.00137331	0	0	0	0.00142902	0	0
S1 Table 1. Continued
Sample	E77R2W32-01	E77R2W32-02	E77R2W32-03	E77R2W32-04	E77R2W32-05	E77R2W32-06	E77R2W32-07	E77R2W32-08	E78R4W48-01	E78R4W48-02	E78R4W48-03	E78R4W48-04	E78R4W48-05
Subunit	1c	1c	1c	1c	1c	1c	1c	1c	1c	1c	1c	1c	1c
Depth (mbsf)	1512.46	1512.46	1512.46	1512.46	1512.46	1512.46	1512.46	1512.46	1520.09	1520.09	1520.09	1520.09	1520.09
SiO2	52.0366	52.5106	52.2925	50.737	51.2636	50.4105	52.9416	51.924	50.5434	51.4549	49.0145	50.6296	49.34
TiO2	0.5694	0.404	0.6013	0.6348	0.7309	0.9355	0.4138	0.5774	0.9092	0.8534	1.3607	0.7811	1.0298
Al2O3	2.875	1.9856	3.2789	2.5546	2.6385	3.095	1.3975	2.9448	3.1216	3.2456	4.9468	3.2185	3.9728
Cr2O3	0.0718	0.1042	0.2208	0.0357	0.0483	0.0237	0.0556	0.0739	0.0493	0.0558	0.2124	0.1675	0.2562
FeO	8.8772	10.3905	8.1719	12.965	13.2677	13.5131	12.8464	9.4624	11.8859	11.3923	9.2117	9.6859	9.6223
MnO	0.2248	0.279	0.207	0.3303	0.3342	0.3285	0.378	0.247	0.297	0.2716	0.2015	0.2252	0.2123
MgO	15.5335	16.7767	16.0028	15.246	14.525	13.925	17.444	15.841	14.2373	14.5561	13.4319	14.4938	13.9998
CaO	19.5756	16.871	19.7503	16.5404	17.2636	17.4695	15.0282	19.0889	18.8218	18.917	20.7054	20.199	19.9852
Na2O	0.2289	0.2085	0.2357	0.2834	0.2956	0.2799	0.167	0.2663	0.3094	0.3268	0.3247	0.2592	0.3103
Total	99.9928	99.5301	100.761	99.3272	100.367	99.9807	100.672	100.426	100.175	101.073	99.4096	99.6598	98.7287
Si4+	1.9255	1.95109	1.91427	1.90783	1.91525	1.89549	1.95287	1.91258	1.8872	1.9	1.83661	1.88941	1.85992
Al3+(tet)	0.0745	0.04891	0.08573	0.09217	0.08475	0.10451	0.04713	0.08742	0.1128	0.1	0.16339	0.11059	0.14008
Al3+(oct)	0.05089	0.03805	0.05575	0.02106	0.03144	0.03266	0.01364	0.04043	0.02459	0.04126	0.0551	0.03098	0.03643
Ti4+	0.01585	0.01129	0.01655	0.01795	0.02054	0.02645	0.01148	0.01599	0.02553	0.0237	0.03835	0.02192	0.02919
Cr3+	0.0021	0.00306	0.00639	0.00106	0.00143	0.000704592	0.00162	0.00215	0.00146	0.00163	0.00629	0.00494	0.00764
Fe3+	0.00624	0.000246816	0.00721	0.05481	0.03223	0.03864	0.02085	0.03187	0.05809	0.03311	0.04889	0.04958	0.06031
Fe2+	0.26848	0.32263	0.24298	0.35291	0.38233	0.3863	0.37546	0.25962	0.31307	0.3187	0.23978	0.25272	0.24305
Mn2+	0.00705	0.00878	0.00642	0.01052	0.01058	0.01046	0.01181	0.00771	0.00939	0.0085	0.0064	0.00712	0.00678
Mg2+	0.85683	0.92924	0.87327	0.8546	0.80895	0.78052	0.95921	0.86981	0.79245	0.80124	0.75027	0.80629	0.78669
Ca2+	0.77615	0.67168	0.7747	0.66643	0.6911	0.70384	0.59399	0.7534	0.75303	0.74847	0.83133	0.80769	0.80723
Na1+	0.01642	0.01502	0.01673	0.02066	0.02141	0.02041	0.01194	0.01902	0.0224	0.0234	0.02359	0.01876	0.02268
100*Mg/(Mg+Fe2+)	76.1417	74.2281	78.2325	70.7737	67.906	66.8929	71.8687	77.0132	71.6812	71.5431	75.781	76.1362	76.397
Wo (%)	40.8186	34.9189	40.9688	35.5632	36.7142	37.6252	30.7981	40.0143	40.517	40.0592	45.6426	43.2684	43.9435
En (%)	45.0617	48.3083	46.1817	45.6043	42.9748	41.7242	49.7346	46.1969	42.6382	42.8835	41.1926	43.1935	42.8256
Fs (%)	14.1197	16.7728	12.8495	18.8325	20.311	20.6506	19.4673	13.7888	16.8447	17.0574	13.1648	13.5381	13.2309
Sc	146.283	127.329	119.473	133.785	132.902	133.116	107.134	130.261	177.563	150.757	178.607	145.276	194.941
Ti	5085.39	4112.29	4187.09	5854.41	5355.72	7101.5	3487.73	4635.95	6461.69	6049.75	7183.72	7766.3	6036.81
V	484.672	437.554	432.53	533.858	530.268	618.876	351.289	488.2	503.117	480.671	553.182	603.592	522.435
Cr	1385.76	677.008	780.198	233.552	330.081	77.6535	344.513	581.202	1290.55	748.52	1363.45	128.796	1436.58
Mn	1598.72	1805	1740.43	1956.22	2457.25	3078.47	2519.38	1792.41	1560.03	1936.35	1657.43	3104.52	1882.93
Co	52.8535	55.0193	56.0917	54.6842	66.3118	76.5026	65.3786	56.1929	45.4652	51.7309	51.6808	67.1331	53.0314
Ni	102.668	88.2294	103.17	63.0607	79.4328	75.297	82.0455	94.7981	57.5928	66.6928	69.1777	58.616	85.6395
Rb	0.0156817	0.0253163	0	0	0.0237808	0.010385	0.186612	0	0.0110227	0.0149314	0.0258435	0.00514055	0.0018945
Sr	7.28429	6.02852	6.50311	6.27318	5.99553	5.74136	4.70883	6.80236	6.93055	7.16594	8.12198	7.78433	8.18492
Y	20.6665	23.2103	18.1834	24.4915	26.3625	32.8205	18.067	22.9963	23.7486	26.1035	25.4019	41.7393	29.0871
Zr	15.0115	11.3252	9.56706	15.401	13.9452	16.575	7.40702	12.4935	20.5928	16.2893	23.9064	20.7715	17.9206
Nb	0.0109824	0.00051185	0.00330356	0.00859564	0.00187561	0.00564036	0.00759718	0.00788836	0.0073412	0.00783405	0.0142395	0.013194	0.00803289
Ba	0.111196	0.035711	0	0.0126306	0.0214422	0.0186752	0.179705	0.007583	0.181095	0.0526238	0.056518	0.0483424	0.0323882
La	0.153459	0.171394	0.123897	0.188744	0.172373	0.19605	0.140653	0.140719	0.206327	0.195178	0.21722	0.302439	0.207658
Ce	0.998219	0.914362	0.817115	1.11506	1.06595	1.26274	0.737892	1.04415	1.12356	1.19199	1.29175	1.94195	1.3208
Pr	0.27759	0.27635	0.244522	0.318331	0.302381	0.354223	0.189599	0.270623	0.31897	0.33352	0.355479	0.555482	0.366274
Nd	2.37962	2.39264	2.09861	2.78396	2.7391	3.11854	1.40717	2.30339	2.79462	2.78815	2.93779	4.72142	3.24743
Sm	1.4834	1.49727	1.18936	1.57721	1.58879	1.94772	1.14866	1.31551	1.50755	1.75166	1.77827	2.54273	1.89248
Eu	0.53849	0.567234	0.479085	0.581793	0.581041	0.704844	0.397748	0.600309	0.654401	0.604827	0.667425	0.965081	0.752137
Gd	2.5656	2.837	2.21459	3.10555	2.94461	3.64635	1.91967	2.72761	3.06712	2.99461	3.28606	4.79957	3.58844
Tb	0.494953	0.537987	0.428633	0.55082	0.568879	0.691512	0.369524	0.53589	0.532021	0.578979	0.562082	0.945377	0.64073
Dy	3.80549	4.12431	3.11896	4.28534	4.41534	5.5207	3.0167	4.08248	4.31656	4.65256	4.46245	7.26796	5.08121
Ho	0.79151	0.880067	0.68189	0.884055	0.969983	1.25353	0.697932	0.875275	0.874098	1.00456	0.963897	1.58083	1.07367
Er	2.27185	2.63714	1.97794	2.68383	3.0195	3.55861	2.07599	2.48348	2.55304	2.93839	2.89989	4.74003	3.32105
Tm	0.313269	0.37314	0.283113	0.383251	0.419569	0.5377	0.318772	0.39047	0.363508	0.42581	0.399848	0.646053	0.459717
Yb	2.13902	2.32413	1.88806	2.44653	2.7164	3.66334	2.15885	2.33869	2.4337	2.79307	2.75629	4.71853	2.89957
Lu	0.301773	0.319189	0.273802	0.346635	0.440477	0.497259	0.30646	0.35211	0.370892	0.393553	0.40372	0.638607	0.414397
Hf	0.850882	0.564247	0.473874	0.814947	0.679086	0.909932	0.414604	0.704502	1.09801	0.879308	1.2768	1.06381	0.906652
Ta	0	0.000192805	0.00354345	0.000985191	0.000497788	0.00168592	0.00260925	0.000908189	0.00419607	0.0020182	0	0.00165031	0.00131174
Pb	0.0120357	0.0107	0.00357267	0.0054957	0.000582504	0.00882409	0.0070563	0.0119467	0.00429548	0.0198606	0.013298	0.00820466	0.0635494
Th	0.00207295	0	0.00113866	0.00200656	0.00390541	0.00218742	4.03239e-05	0.00188097	0.00150046	0.00379093	0	0	0
U	0	0	0.00121632	0	0.00274225	0.000391884	0.00109194	0.00214805	0.00550477	0	0.00154899	0.00525036	0
S1 Table 1. Continued
Sample	E78R4W48-06	E78R4W48-07	E78R4W48-08	E78R4W48-09	E78R4W48-10	E79R2W38-01	E79R2W38-02	E79R2W38-03	E79R2W38-04	E79R2W38-05	E79R2W38-06	E79R2W38-07	E79R2W38-08
Subunit	1c	1c	1c	1c	1c	1c	1c	1c	1c	1c	1c	1c	1c
Depth (mbsf)	1520.09	1520.09	1520.09	1520.09	1520.09	1525.84	1525.84	1525.84	1525.84	1525.84	1525.84	1525.84	1525.84
SiO2	50.4691	51.2875	50.1785	50.7925	49.7278	50.013	50.265	49.973	51.766	50.6	50.934	49.636	51.938
TiO2	0.901	0.8027	1.1471	1.1214	0.9693	1.056	0.982	0.929	0.676	0.729	0.916	1.009	0.55
Al2O3	3.5921	3.2383	4.8924	4.1887	4.6099	4.269	3.658	3.492	1.594	3.892	3.13	3.224	1.97
Cr2O3	0.2047	0.0876	0.2065	0.2525	0.3209	0.205	0.39	0.171	0.066	0.249	0.178	0.057	0.025
FeO	10.051	10.1353	8.6981	9.4558	9.0089	8.569	9.529	9.683	12.835	8.318	9.588	13.14	10.048
MnO	0.2328	0.2527	0.1918	0.2183	0.1868	0.238	0.297	0.257	0.381	0.199	0.224	0.376	0.343
MgO	14.5004	14.8546	14.2613	14.067	14.2407	13.844	14.385	13.445	14.106	14.217	14.171	12.046	15.236
CaO	19.4683	19.5747	20.4126	20.2283	20.277	20.648	19.78	20.219	18.243	20.774	20.449	19.613	19.249
Na2O	0.3001	0.2781	0.292	0.2876	0.2899	0.257	0.304	0.354	0.245	0.347	0.303	0.409	0.25
Total	99.7195	100.511	100.28	100.612	99.6312	99.099	99.59	98.523	99.912	99.325	99.893	99.51	99.609
Si4+	1.88311	1.89734	1.85665	1.88002	1.85285	1.87615	1.8778	1.89234	1.94769	1.88835	1.89902	1.88527	1.93781
Al3+(tet)	0.11689	0.10266	0.14335	0.11998	0.14715	0.12385	0.1222	0.10766	0.05231	0.11165	0.10098	0.11473	0.06219
Al3+(oct)	0.04109	0.03854	0.07002	0.06277	0.0553	0.06491	0.03888	0.0482	0.01838	0.05956	0.03657	0.02961	0.02444
Ti4+	0.02528	0.02233	0.03192	0.03122	0.02716	0.02979	0.02759	0.02646	0.01913	0.02046	0.02568	0.02882	0.01543
Cr3+	0.00604	0.00256	0.00604	0.00739	0.00945	0.00608	0.01152	0.00512	0.00196	0.00735	0.00525	0.00171	0.000737487
Fe3+	0.0409	0.03684	0.02441	0.00803	0.04902	0.01197	0.03864	0.02742	0.01159	0.02893	0.02969	0.05589	0.02423
Fe2+	0.27274	0.27674	0.24476	0.28468	0.23171	0.25686	0.25908	0.27923	0.39229	0.23068	0.26927	0.36151	0.2893
Mn2+	0.00736	0.00792	0.00601	0.00684	0.0059	0.00756	0.0094	0.00824	0.01214	0.00629	0.00707	0.0121	0.01084
Mg2+	0.80653	0.81919	0.78661	0.77617	0.79097	0.77417	0.80109	0.75895	0.79117	0.79092	0.78761	0.68204	0.8474
Ca2+	0.77835	0.77593	0.80929	0.80226	0.80954	0.82996	0.79178	0.82038	0.73547	0.83071	0.81694	0.79821	0.76953
Na1+	0.02171	0.01995	0.02095	0.02064	0.02094	0.01869	0.02202	0.02599	0.01787	0.02511	0.02191	0.03012	0.01809
100*Mg/(Mg+Fe2+)	74.7292	74.7484	76.2685	73.1649	77.3429	75.0871	75.5624	73.1039	66.8523	77.4197	74.5222	65.3577	74.5491
Wo (%)	41.9003	41.4525	43.9675	43.0604	44.1835	44.5977	42.7538	44.1407	38.3272	44.8472	43.5973	43.3395	40.3695
En (%)	43.4175	43.7634	42.7354	41.6596	43.17	41.5998	43.2567	40.8353	41.2297	42.699	42.0324	37.0321	44.454
Fs (%)	14.6822	14.7841	13.2972	15.28	12.6465	13.8025	13.9894	15.024	20.4431	12.4538	14.3703	19.6284	15.1765
Sc	140.842	149.109	133.925	173.32	206.658	210.55	170.099	126.288	107.24	187.328	163.91	166.625	147.381
Ti	6652.01	5913.44	6610.16	8528.03	7266.01	7099.86	6772.32	6548.83	6314.57	5445.65	6190.38	8954.7	6267.13
V	542.497	492.231	496.342	590.881	566.663	595.397	567.142	524.971	566.807	503.007	536.236	782.366	516.74
Cr	243.916	677.057	959.161	1457.74	1834.15	1670.3	1177.24	78.6702	5.75436	1392.26	932.414	10.9628	602.45
Mn	2616.05	1719.72	1584.83	1563.52	1645.32	1541.29	2265.1	2946.31	3201.14	1619.56	1754.92	2303.32	2017.1
Co	62.5544	50.9612	48.4035	48.1004	49.5823	47.2104	59.0769	63.6605	59.907	49.0488	51.773	55.039	54.776
Ni	83.9712	74.69	92.2712	71.9296	82.176	99.6625	105.058	95.8366	53.3998	94.2177	95.9202	39.3896	93.3479
Rb	0.00208855	0.00779155	0.00934113	0.0126996	0.0110339	0.0227931	0	0.00959648	0.00427077	0.0232626	0.00915211	0.0129177	0
Sr	7.26218	7.57535	11.7209	8.3938	8.42288	7.4781	6.45256	6.42707	6.25183	7.47655	7.76305	9.65646	6.54606
Y	33.7749	23.8859	23.5713	28.6466	25.9564	24.1764	28.0186	29.7487	30.8557	21.7458	24.5293	42.3261	24.7186
Zr	17.6338	17.3581	26.5213	33.8845	25.134	22.5202	15.9832	14.0181	12.7859	15.4227	16.3801	26.817	14.285
Nb	0.00476708	0.00904842	0.0360007	0.0184051	0.0125791	0.00625123	0.00940272	0	0.00557175	0.00303028	0.0118857	0.00578029	0.0059084
Ba	0.0286698	0.0354414	0.103317	0.016299	0.0648131	0.0211531	0	0.0422236	0	0.0610753	0.0796548	0.0386247	0.0197563
La	0.280477	0.19175	0.255665	0.283342	0.193324	0.204437	0.186302	0.19703	0.188198	0.165702	0.217394	0.465935	0.159797
Ce	1.48676	1.18381	1.55233	1.57911	1.29967	1.19287	1.10485	1.1377	1.26188	1.00638	1.27162	2.77798	1.09929
Pr	0.422864	0.32936	0.37768	0.416877	0.336386	0.366191	0.310938	0.354416	0.369002	0.307928	0.297428	0.847028	0.299919
Nd	3.31793	2.59306	3.13397	3.58339	3.03032	2.75036	2.52601	3.43509	2.92884	2.63269	2.7662	5.74535	2.5234
Sm	2.06534	1.59537	1.79981	1.95525	1.60782	1.60139	1.70907	1.82785	1.9135	1.52054	1.82662	3.19439	1.55649
Eu	0.827699	0.6251	0.545281	0.721027	0.676246	0.60114	0.679998	0.732233	0.696923	0.587474	0.631209	1.12817	0.695861
Gd	3.86435	2.89987	2.64862	3.61713	3.31162	3.0754	2.85449	3.41126	3.52485	2.36955	3.03156	5.43774	3.00194
Tb	0.756472	0.52336	0.570704	0.672223	0.621951	0.613817	0.601021	0.703713	0.714314	0.514688	0.620257	1.06204	0.566214
Dy	5.6791	4.23836	4.04065	5.04956	4.63634	4.33974	4.8556	5.18029	5.66566	3.87894	4.40167	7.76164	4.53078
Ho	1.23855	0.904938	0.891267	1.05225	0.979443	0.948429	1.12601	1.19825	1.19913	0.819069	0.988317	1.67281	0.940532
Er	3.70436	2.56798	2.49003	3.06806	3.03587	2.81727	3.17359	3.47655	3.47927	2.54384	2.98847	4.73301	2.74677
Tm	0.581353	0.380519	0.376792	0.437935	0.410348	0.411977	0.479042	0.463502	0.57956	0.37298	0.414924	0.702003	0.431074
Yb	3.72565	2.63551	2.43953	3.12092	2.58786	2.36121	3.35907	3.74577	3.43732	2.48997	2.72175	4.54747	2.7233
Lu	0.516506	0.390124	0.38948	0.432211	0.420845	0.388592	0.490662	0.484028	0.548232	0.359072	0.386937	0.669415	0.446122
Hf	0.880293	0.918655	1.29148	1.69482	1.40476	1.22242	0.837749	0.744088	0.593095	0.805146	0.804731	1.31279	0.709962
Ta	0.00661719	0.0013437	0.00249758	0.00396285	0.000376373	0.00539677	0.00271135	0.0013568	0.00120664	0	0.00257928	0.00125366	0.00255616
Pb	0.0424565	0.0129723	0.0232752	0.0332989	0.0388803	0	0.00826322	0	0	0.00715299	0.0667892	0.006058	0
Th	0.00428472	0.000909111	0.0171692	0.00513745	0	0	0	0	0.00132785	0.00144427	0	0.00137497	0
U	0	0.00163408	0	0	0	0	0	0	0	0	0	0	0
S1 Table 1. Continued
Sample	E79R2W38-09	E79R2W38-10	E79R2W38-11	E79R2W38-12	E79R2W38-13	E79R2W38-14	E80R1W93-01	E80R1W93-02	E80R1W93-03	E80R1W93-04	E80R1W93-05	E80R1W93-06	E80R1W93-07
Subunit	1c	1c	1c	1c	1c	1c	1c	1c	1c	1c	1c	1c	1c
Depth (mbsf)	1525.84	1525.84	1525.84	1525.84	1525.84	1525.84	1534.53	1534.53	1534.53	1534.53	1534.53	1534.53	1534.53
SiO2	50.143	50.679	50.324	50.191	50.255	50.81	51.4961	50.8152	50.7671	51.6209	51.3231	51.7916	51.8644
TiO2	0.8	0.854	1.135	1.019	0.991	0.765	0.7434	0.8029	0.6477	0.5793	0.6879	0.7442	0.6911
Al2O3	3.667	3.447	2.848	2.454	4.351	3.484	2.7982	3.8414	2.9265	3.5634	2.8332	3.4544	2.7698
Cr2O3	0.138	0.176	0.06	0.001	0.282	0.178	0.044	0.3412	0.2788	0.4688	0.1024	0.1959	0.0485
FeO	9.213	8.684	13.529	14.76	8.357	8.909	10.5925	8.9581	9.9724	8.7593	8.9985	8.3462	11.0715
MnO	0.157	0.205	0.398	0.32	0.149	0.301	0.2634	0.2156	0.2696	0.2201	0.2125	0.2022	0.3012
MgO	14.687	14.085	12.494	11.966	14.008	14.42	15.2014	15.388	15.8895	15.7554	15.7346	15.701	15.8845
CaO	19.521	20.71	18.821	18.38	20.723	20.56	18.6077	19.095	18.0018	19.0548	19.4569	19.6111	17.7415
Na2O	0.28	0.291	0.382	0.355	0.326	0.305	0.2505	0.2713	0.2481	0.2612	0.2491	0.2721	0.2691
Total	98.606	99.131	99.991	99.446	99.442	99.732	99.9972	99.7287	99.0015	100.283	99.5982	100.319	100.642
Si4+	1.88565	1.89967	1.90322	1.91777	1.87544	1.89138	1.91516	1.88525	1.89874	1.9022	1.90521	1.90628	1.91359
Al3+(tet)	0.11435	0.10033	0.09678	0.08223	0.12456	0.10862	0.08484	0.11475	0.10126	0.0978	0.09479	0.09372	0.08641
Al3+(oct)	0.04819	0.05197	0.03018	0.02829	0.06682	0.04425	0.03782	0.05323	0.02775	0.05698	0.02918	0.05615	0.03405
Ti4+	0.02263	0.02407	0.03228	0.02928	0.02781	0.02142	0.02079	0.0224	0.01822	0.01605	0.0192	0.0206	0.01918
Cr3+	0.0041	0.00522	0.00179	3.02106e-05	0.00832	0.00524	0.00129	0.01001	0.00824	0.01366	0.00301	0.0057	0.00141
Fe3+	0.03723	0.01615	0.02826	0.02165	0.01738	0.03831	0.02221	0.02622	0.04682	0.01372	0.04213	0.01009	0.03184
Fe2+	0.25252	0.25608	0.39966	0.45002	0.24344	0.23904	0.30726	0.25173	0.26511	0.25623	0.23724	0.24683	0.30979
Mn2+	0.005	0.00651	0.01275	0.01036	0.00471	0.00949	0.0083	0.00678	0.00854	0.00687	0.00668	0.0063	0.00941
Mg2+	0.82333	0.78704	0.70438	0.68157	0.77927	0.80017	0.84276	0.85103	0.88589	0.86547	0.87071	0.86148	0.87366
Ca2+	0.78659	0.83181	0.76269	0.75251	0.82865	0.82006	0.74151	0.75908	0.72143	0.75237	0.77392	0.77343	0.7014
Na1+	0.02042	0.02115	0.02801	0.0263	0.02359	0.02201	0.01806	0.01952	0.01799	0.01866	0.01793	0.01942	0.01925
100*Mg/(Mg+Fe2+)	76.5283	75.4506	63.8002	60.2312	76.1966	76.9979	73.2822	77.1727	76.967	77.157	78.5875	77.7292	73.8231
Wo (%)	42.2342	44.3648	40.8573	39.94	44.7589	44.1065	39.2017	40.7705	38.5289	40.1464	41.1252	41.1022	37.2124
En (%)	44.207	41.9769	37.7332	36.1749	42.0918	43.0368	44.5545	45.7092	47.3126	46.1813	46.2684	45.781	46.3517
Fs (%)	13.5588	13.6583	21.4094	23.8851	13.1493	12.8566	16.2438	13.5203	14.1585	13.6723	12.6064	13.1169	16.4359
Sc	192.653	165.576	143.444	142.45	220.284	185.954	126.225	146.307	150.222	150.057	130.228	126.625	113.017
Ti	7320.59	6583.05	5917.19	8177.87	7950.76	6473.57	5314.8	5538.97	4748.16	4453.45	4943.86	5134.68	4071.67
V	575.998	550.591	489.13	646.946	620.588	547.021	508.234	518.818	469.85	478.031	469.906	480.085	406.813
Cr	1650.83	464.003	270.865	31.5567	2444.96	1215.59	288.799	1739.37	1869.92	1754.14	1032.25	730.637	647.584
Mn	1485.63	1973.29	2223.42	2475.04	1480.52	1697.38	2137.01	1699.09	1918.75	1722.42	1675.87	1919.11	1842.16
Co	45.7829	55.9625	56.5776	57.9289	47.0363	50.2511	58.7225	52.3479	56.0087	51.7834	52.3086	55.9829	54.3123
Ni	93.9472	92.9101	75.5496	55.7428	94.7318	98.1357	108.323	117.816	113.607	111.546	112.487	120.852	106.963
Rb	0	0.00894339	0.0032684	0.00386819	0	0.0181001	0.00388254	0.191712	0.0100829	0.00393115	0.00834915	0.00430424	0.000506705
Sr	6.74289	7.39325	6.20853	6.94965	7.06476	7.83397	6.7146	6.6647	5.81602	6.87277	7.02468	7.68059	5.73442
Y	24.0973	26.0123	24.6941	33.4281	27.3807	24.6931	24.328	21.5759	20.6728	23.713	20.5109	22.6887	18.5178
Zr	22.6847	16.2791	13.4855	21.1123	27.078	17.3509	12.3572	16.7786	11.953	11.3342	12.9863	13.7759	8.81428
Nb	0.0151287	0.00615994	0.00556482	0.011331	0.0190531	0.00308192	0.00407427	0.0111585	0.00263791	0.00318428	0.00595811	0.00876076	0.00534524
Ba	0	0.0825227	0	0	0	0.0414854	0.0422221	0.147147	0.0182958	0.0184684	0.019454	0.10084	0
La	0.259349	0.17823	0.168396	0.264302	0.231073	0.166138	0.150043	0.171088	0.127174	0.157429	0.164589	0.172988	0.111222
Ce	1.27176	1.16064	1.07248	1.59719	1.26875	1.14231	1.0422	1.05754	0.837996	1.08433	0.976185	1.1164	0.7714
Pr	0.356495	0.333334	0.317256	0.461753	0.379662	0.302495	0.308736	0.271813	0.2561	0.309718	0.289395	0.289462	0.239238
Nd	2.90537	3.01216	2.55246	3.98	3.51449	2.98704	2.47894	2.2192	1.99216	2.63302	2.33743	2.5076	1.77463
Sm	1.71117	1.79247	1.55306	2.36905	2.1607	1.51501	1.64458	1.47459	1.28766	1.56686	1.31094	1.59691	1.142
Eu	0.652387	0.653827	0.569905	0.866502	0.621585	0.716831	0.590956	0.583136	0.489574	0.599151	0.510052	0.551763	0.468494
Gd	2.90989	2.86491	2.76666	3.81435	3.39803	2.61553	2.94168	2.59254	2.43365	2.89239	2.49823	2.72321	1.99027
Tb	0.561832	0.576592	0.581419	0.766664	0.637927	0.603511	0.5608	0.497029	0.451824	0.550742	0.467784	0.492896	0.424191
Dy	4.68418	4.5594	4.30977	6.18404	4.78202	4.68484	4.36824	3.8278	3.70087	4.14097	3.62089	4.02995	3.36093
Ho	0.916548	1.03968	0.949255	1.30248	1.16156	1.07151	0.949335	0.826367	0.777892	0.922675	0.761231	0.869338	0.688762
Er	2.7565	3.1178	3.02644	3.9305	3.10405	2.92205	2.75041	2.43497	2.36289	2.62943	2.23642	2.5165	2.03525
Tm	0.408524	0.482742	0.402079	0.62592	0.503229	0.435893	0.377211	0.347071	0.355233	0.372504	0.309211	0.370411	0.295726
Yb	2.387	2.88233	2.78337	3.93576	3.08409	2.83032	2.56874	2.38586	2.14072	2.4682	2.11837	2.36583	1.96603
Lu	0.414083	0.417581	0.393315	0.61821	0.503212	0.382626	0.385521	0.319005	0.30346	0.349066	0.309137	0.373902	0.272565
Hf	1.3382	0.991288	0.844854	1.28987	1.56359	1.05842	0.729787	1.01148	0.728169	0.528387	0.764249	0.755906	0.500092
Ta	0.0052224	0.00265101	0	0.00242541	0.00269744	0	0.000297924	0	0	0.00179577	0.00344502	0.00105053	0
Pb	0	0	0.0334529	0	0.0212783	0	0.014191	0.171522	0.00365746	0.011637	0.0196037	0.0374517	0.00963529
Th	0.00286994	0.00145839	0	0.00133713	0.00298377	0.00289128	0	0.00144361	0	0.00312252	0.00249122	0.000279119	0.000375489
U	0	0	0.00118587	0	0	0	0	0.00377346	0.000988606	0.00175858	0.000601638	0	0.000552056
S1 Table 1. Continued
Sample	E80R1W93-08	E80R1W93-09	E80R1W37-01	E80R1W37-02	E80R1W37-03	E80R1W37-04	E80R1W37-05	E80R1W37-06	E80R1W37-07	E80R1W37-08	E80R1W37-09	E80R1W37-10	E80R1W37-11
Subunit	1c	1c	1c	1c	1c	1c	1c	1c	1c	1c	1c	1c	1c
Depth (mbsf)	1534.53	1534.53	1533.97	1533.97	1533.97	1533.97	1533.97	1533.97	1533.97	1533.97	1533.97	1533.97	1533.97
SiO2	51.6262	51.4542	51.498	51.346	50.855	51.525	51.125	50.889	50.639	50.526	50.62	50.271	50.445
TiO2	0.8359	0.7033	0.537	0.515	0.508	0.498	0.497	0.469	0.671	0.769	0.508	0.781	0.869
Al2O3	2.8506	3.387	2.747	2.556	2.704	3.634	3.604	3.393	3.433	3.251	3.081	3.718	4.115
Cr2O3	0.4021	0.6321	0.088	0.278	0.099	0.312	0.485	0.254	0.225	0.638	0.323	0.648	0.299
FeO	10.6896	9.1849	8.548	7.897	10.312	7.658	8.496	8.436	8.06	7.473	8.547	8.008	7.309
MnO	0.2934	0.2319	0.247	0.194	0.121	0.299	0.233	0.209	0.204	0.212	0.16	0.173	0.244
MgO	15.0599	15.5004	15.05	15.719	15.197	15.174	14.843	14.925	14.951	15.015	15.05	14.751	14.93
CaO	18.5148	19.0368	20.219	19.497	17.761	20.755	19.748	19.829	20.619	20.369	19.963	20.045	20.634
Na2O	0.289	0.3175	0.236	0.199	0.218	0.247	0.26	0.301	0.27	0.295	0.271	0.287	0.269
Total	100.561	100.448	99.17	98.201	97.775	100.102	99.291	98.705	99.072	98.548	98.523	98.682	99.114
Si4+	1.91261	1.8974	1.92292	1.9295	1.93113	1.90085	1.90723	1.90679	1.88976	1.89501	1.9008	1.88597	1.87891
Al3+(tet)	0.08739	0.1026	0.07708	0.0705	0.06887	0.09915	0.09277	0.09321	0.11024	0.10499	0.0992	0.11403	0.12109
Al3+(oct)	0.03709	0.04461	0.04382	0.04272	0.05216	0.05887	0.0657	0.05664	0.04077	0.03873	0.03717	0.05038	0.05957
Ti4+	0.02329	0.0195	0.01508	0.01455	0.01451	0.01382	0.01394	0.01322	0.01883	0.02169	0.01435	0.02204	0.02434
Cr3+	0.01178	0.01843	0.0026	0.00826	0.00297	0.0091	0.01431	0.00752	0.00664	0.01892	0.00959	0.01922	0.00881
Fe3+	0.0127	0.02325	0.0176	0.00491	0.000765858	0.02122	0.00369	0.02448	0.0447	0.02541	0.04348	0.02124	0.02345
Fe2+	0.3185	0.26001	0.24934	0.24328	0.32672	0.21506	0.26138	0.23988	0.20686	0.209	0.22493	0.23002	0.20423
Mn2+	0.00921	0.00724	0.00781	0.00618	0.00389	0.00934	0.00736	0.00663	0.00645	0.00674	0.00509	0.0055	0.0077
Mg2+	0.8317	0.85206	0.83771	0.88055	0.86025	0.83449	0.82543	0.83365	0.83173	0.83948	0.84244	0.82495	0.82897
Ca2+	0.73497	0.75219	0.80895	0.78506	0.72267	0.82044	0.78938	0.79611	0.82449	0.81858	0.80322	0.80578	0.82351
Na1+	0.02076	0.0227	0.01709	0.0145	0.01605	0.01767	0.01881	0.02187	0.01954	0.02145	0.01973	0.02088	0.01943
100*Mg/(Mg+Fe2+)	72.3092	76.6193	77.0627	78.3526	72.4745	79.5093	75.9498	77.655	80.0826	80.0664	78.9267	78.1965	80.2333
Wo (%)	38.9869	40.3479	42.6661	41.1265	37.8432	43.8741	42.0735	42.5811	44.2542	43.8432	42.9393	43.3041	44.3531
En (%)	44.1181	45.7051	44.183	46.129	45.0477	44.6253	43.9949	44.5888	44.6429	44.9628	45.0361	44.3343	44.6473
Fs (%)	16.895	13.9471	13.1509	12.7445	17.1091	11.5006	13.9316	12.8301	11.1029	11.194	12.0246	12.3617	10.9996
Sc	117.513	117.141	146.194	125.505	138.647	154.554	168.725	183.187	155.017	166.328	157.283	184.498	135.226
Ti	6220.74	5063.19	5528.77	3395.42	5360.4	4592.57	4734.04	4811.82	5319.34	5407.63	4622.29	5806.96	5203.52
V	526.494	485.305	543.773	358.905	501.068	478.274	495.31	529.01	520.974	531.408	477.068	551.371	491.311
Cr	2349.99	3521.73	194.089	1304.83	321.69	1682.52	2086.92	2216.29	1722.43	1453.14	1794.27	3151.94	1049.97
Mn	2254.21	1795.51	2025.1	1719.03	2271.41	1673.36	1714.32	1634.59	1527.07	1673.63	1716.27	1526.95	1382.6
Co	55.6547	50.448	58.929	52.5634	61.0556	52.2608	52.7163	51.6821	50.622	51.4663	53.6116	48.8046	46.9608
Ni	148.621	147.297	87.8084	113.042	96.2177	112.028	109.756	109.33	117.883	105.688	109.198	111.781	117.143
Rb	0.00994936	0.0157243	0.00358717	0.00883475	0	0	0	0	0.011788	0	0.00817887	0.0187378	0.0086359
Sr	7.24051	7.37519	7.49318	5.5481	5.70861	6.66601	6.55204	7.07735	7.47025	7.11339	6.72831	6.89458	6.75116
Y	31.0906	24.3067	24.2903	15.0566	23.3233	17.9815	19.0278	22.3533	22.7339	20.2355	18.8997	21.9896	18.3497
Zr	16.2534	13.0096	12.8123	7.13667	11.7576	10.5085	11.6728	13.2834	17.2304	15.2574	10.4843	18.5808	14.6574
Nb	0.00571316	0.00988563	0.00589749	0.00295323	0.00878415	0.00627555	0.0243447	0.00618969	0.00635848	0.00306157	0.00304568	0.0280993	0
Ba	0.103825	0.172864	0	0	0	0	0.0206974	0	0.0862712	0.060088	0	0	0.0184404
La	0.226352	0.186345	0.162453	0.0821669	0.134807	0.103411	0.135269	0.168648	0.192717	0.152679	0.113502	0.265948	0.133177
Ce	1.34627	1.13798	1.10059	0.618686	0.964478	0.742478	0.768998	1.05042	1.11921	0.954046	0.833693	1.32512	0.954382
Pr	0.359969	0.324677	0.339014	0.188301	0.292843	0.20821	0.226902	0.292011	0.32657	0.260842	0.230906	0.365065	0.256341
Nd	3.43476	2.72062	2.69971	1.68617	2.37483	2.04613	1.95668	3.034	2.8932	2.5107	1.90429	2.9275	2.26672
Sm	2.13712	1.65413	1.68133	0.927277	1.52058	1.03832	1.3423	1.53665	1.33539	1.69688	1.28621	1.65915	1.22176
Eu	0.80582	0.618261	0.68483	0.375339	0.510454	0.437707	0.475489	0.502344	0.648613	0.563485	0.524147	0.570152	0.566513
Gd	3.59789	2.92737	2.97704	1.87661	2.81361	2.3354	2.60079	2.70855	2.78624	2.47604	2.46627	2.73541	2.34095
Tb	0.717252	0.535661	0.5494	0.310692	0.527816	0.442387	0.45891	0.56998	0.489047	0.503458	0.426055	0.542476	0.451606
Dy	5.37462	4.25053	4.28335	2.57833	4.43023	3.12629	3.53714	3.9767	4.25535	4.00951	3.48445	4.1267	3.39057
Ho	1.24206	0.919102	1.02395	0.563149	0.866868	0.684723	0.753895	0.925821	0.934261	0.773571	0.760706	0.924865	0.690824
Er	3.68662	2.62818	3.05388	1.92509	2.71638	2.24691	2.03641	2.54871	2.83127	2.30532	2.29393	2.72472	2.15415
Tm	0.524962	0.40201	0.421539	0.254292	0.411169	0.326975	0.341814	0.353957	0.414949	0.363681	0.335095	0.37253	0.304298
Yb	3.47545	2.5956	2.83822	1.73395	2.4366	1.72675	1.992	2.49763	2.62088	2.55485	1.90279	2.44665	1.9109
Lu	0.506655	0.357279	0.361083	0.234572	0.405582	0.341543	0.309407	0.349658	0.372271	0.384501	0.308226	0.352583	0.304284
Hf	0.760911	0.682626	0.62777	0.390743	0.721629	0.612827	0.622801	0.769546	1.04539	0.901586	0.728914	1.14312	0.868376
Ta	0	0.000484789	0.00129163	0	0.00255312	0.00135527	0	0	0.00274098	0.00132066	0.00132629	0.00135483	0.00262921
Pb	0.00872586	0.0245044	0.012334	0.00346994	0	0.00044231	0	0.0183798	0.0597417	0.0276136	0.030294	0	0.0315318
Th	0.000711631	0.00209308	0.00142183	0	0.00140794	0	0.00145423	0.00147578	0.00151588	0.0014597	0	0.00748566	0
U	0	0.0012242	0	0	0.00126921	0	0	0	0	0	0	0	0
S1 Table 1. Continued
Sample	E80R1W37-12	E80R1W37-13	E80R2W31-01	E80R2W31-02	E80R2W31-03	E80R2W31-04	E80R2W31-05	E82R1W23-01	E82R1W23-02	E82R1W23-03	E82R1W23-04	E82R1W23-05	E82R3W58-01
Subunit	1c	1c	1d	1d	1d	1d	1d	1d	1d	1d	1d	1d	1d
Depth (mbsf)	1533.97	1533.97	1535.29	1535.29	1535.29	1535.29	1535.29	1552.23	1552.23	1552.23	1552.23	1552.23	1555.28
SiO2	50.988	51.882	51.494	52.183	51.95	53.111	52.37	54.283	52.345	52.312	52.01	51.333	53.116
TiO2	0.699	0.564	0.568	0.449	0.519	0.303	0.516	0.304	0.574	0.566	0.535	0.758	0.263
Al2O3	3.321	3.066	4.038	3.86	4.091	2.917	3.438	2.007	3.9	4.02	4.329	4.869	2.779
Cr2O3	0.28	0.07	0.298	0.365	0.128	0.294	0.362	0.046	0.188	0.231	0.027	0.127	0.288
FeO	7.593	8.121	6.475	6.397	7.091	5.595	6.143	8.144	6.946	6.758	6.891	6.96	5.366
MnO	0.128	0.221	0.154	0.265	0.129	0.114	0.186	0.227	0.192	0.151	0.225	0.186	0.123
MgO	15.048	15.405	16.757	17.16	17.961	17.452	17.083	20.478	17.882	17.467	17.012	16.551	17.387
CaO	20.589	20.55	19.539	19.516	17.606	20.377	20.109	15.508	18.108	19.199	19.295	19.37	20.665
Na2O	0.276	0.266	0.183	0.218	0.198	0.227	0.188	0.159	0.223	0.203	0.246	0.192	0.181
Total	98.922	100.145	99.506	100.413	99.673	100.39	100.395	101.156	100.358	100.907	100.57	100.346	100.168
Si4+	1.90366	1.91352	1.89434	1.90019	1.90073	1.92999	1.90838	1.94967	1.9037	1.89464	1.89125	1.87482	1.93463
Al3+(tet)	0.09634	0.08648	0.10566	0.09981	0.09927	0.07001	0.09162	0.05033	0.0963	0.10536	0.10875	0.12518	0.06537
Al3+(oct)	0.04981	0.0468	0.06943	0.06586	0.07716	0.05493	0.05604	0.03464	0.07088	0.06626	0.07679	0.08443	0.05394
Ti4+	0.01963	0.01564	0.01571	0.0123	0.01428	0.00828	0.01414	0.00821	0.0157	0.01542	0.01463	0.02082	0.0072
Cr3+	0.00827	0.00204	0.00867	0.01051	0.0037	0.00845	0.01043	0.00131	0.00541	0.00661	0.000776272	0.00367	0.00829
Fe3+	0.01899	0.02538	0.00919	0.01424	0.0039	0.00607	0.01015	0.00904	0.00434	0.01591	0.01926	0.00904	0.00151
Fe2+	0.2181	0.22512	0.19002	0.18057	0.21308	0.16397	0.17706	0.23559	0.20693	0.18879	0.1903	0.20355	0.16195
Mn2+	0.00405	0.0069	0.0048	0.00817	0.004	0.00351	0.00574	0.00691	0.00591	0.00463	0.00693	0.00575	0.00379
Mg2+	0.83751	0.84697	0.91894	0.93148	0.97961	0.94538	0.92797	1.09641	0.96946	0.94305	0.92216	0.90111	0.94403
Ca2+	0.82367	0.81212	0.77019	0.76147	0.69022	0.79342	0.78517	0.59682	0.70565	0.74507	0.7518	0.75803	0.8065
Na1+	0.01998	0.01902	0.01305	0.01539	0.01405	0.01599	0.01328	0.01107	0.01573	0.01426	0.01735	0.0136	0.01278
100*Mg/(Mg+Fe2+)	79.339	79.0018	82.865	83.7624	82.1345	85.2193	83.9769	82.3131	82.4098	83.3201	82.8938	81.5735	85.3569
Wo (%)	43.8288	43.1015	40.9861	40.6437	36.6571	41.6983	41.539	30.9424	37.4939	39.6967	40.3269	40.6954	42.1703
En (%)	44.5655	44.9508	48.9019	49.7181	52.0263	49.6842	49.0936	56.8435	51.5112	50.2446	49.4653	48.3766	49.3618
Fs (%)	11.6057	11.9477	10.112	9.63823	11.3166	8.6175	9.36734	12.2142	10.9949	10.0587	10.2079	10.9279	8.46787
Sc	142.877	141.208	146.986	137.408	155.566	101.308	119.848	100.413	121.49	141.067	141.065	141.728	107.031
Ti	5255.04	5164.82	3823.76	3010.18	4211.08	2095.78	2458.69	4382.05	3187.26	4090.06	4600.24	4527.52	2280.1
V	499.393	508.128	421.467	349.926	423.648	267.751	313.716	384.075	350.498	424.915	443.685	459.972	288.151
Cr	1205.43	775.771	1477.86	1630.37	1337.71	1747.47	1738.54	486.202	1078.95	1296.35	834.282	933.249	2140.18
Mn	1490.18	1619.15	1230.61	1787.41	1533.64	1091.64	1241.7	1032.91	1198.32	1410.93	1360.74	1370.96	1104.62
Co	48.6346	52.6577	44.9971	60.6353	53.0889	41.9098	45.8209	36.5361	42.6207	51.3426	48.61	50.3478	43.3202
Ni	125.374	119.614	171.11	211.522	200.222	185.765	190.239	121.993	157.999	182.438	169.708	180.653	197.3
Rb	0.0139203	0.00855142	0.0483215	0.529191	0.13323	0	0.00282888	0.0265749	2.21769	1.99351	0.975092	0.172554	0.00305505
Sr	7.13009	7.47907	6.41937	7.93638	7.53493	6.14105	6.14602	5.83191	5.90521	14.4395	7.28712	6.97201	6.4485
Y	18.9764	21.1445	15.4109	14.2785	17.3805	8.71151	12.0128	17.0703	13.5021	17.9509	17.4596	18.0999	9.50696
Zr	14.9309	13.7757	10.552	9.99274	16.3327	3.58356	5.4064	15.1843	9.91594	19.0561	19.7153	18.9061	3.49192
Nb	0.00617762	0.00951815	0.00791408	0.0198988	0.026208	0.00124807	0.000855034	0.0119376	0.0166064	0.0284119	0.0191184	0.0194703	0.00390864
Ba	0.0209622	0	0.00346106	0.579236	1.00634	0	0.0373884	0.0412795	0.299162	0.821102	0.40558	0.263218	0.0164205
La	0.204332	0.177624	0.0855822	0.108963	0.127208	0.0603304	0.0659162	0.155809	0.0739851	0.109523	0.113819	0.123668	0.0579343
Ce	0.942391	0.982709	0.590043	0.615422	0.722997	0.336214	0.439857	0.81934	0.49798	0.737026	0.681824	0.763662	0.351965
Pr	0.255908	0.274975	0.174341	0.166289	0.203356	0.112014	0.121993	0.22274	0.142057	0.198734	0.203228	0.237359	0.117553
Nd	2.25231	2.39954	1.52721	1.31189	1.64505	0.850467	1.19699	1.99737	1.17177	1.58746	1.83536	1.8772	0.947856
Sm	1.08294	1.43072	0.983976	0.916872	0.979986	0.559346	0.714311	1.21374	0.673144	1.09616	1.10618	1.35186	0.654181
Eu	0.524995	0.549154	0.406856	0.345397	0.436742	0.215535	0.335955	0.457253	0.320786	0.431905	0.47874	0.464501	0.263692
Gd	2.31075	2.77601	1.68464	1.63766	2.03048	1.06565	1.3849	2.11984	1.57145	2.06006	2.14221	2.20533	1.08344
Tb	0.520435	0.514644	0.347772	0.322872	0.40378	0.210841	0.271027	0.388191	0.313169	0.408016	0.36668	0.406325	0.224621
Dy	3.61655	3.76476	2.63321	2.48025	3.05269	1.60671	2.15107	3.14581	2.28529	3.18519	3.03423	3.24407	1.73585
Ho	0.73881	0.849711	0.551985	0.505151	0.676785	0.343175	0.46594	0.616039	0.522008	0.663645	0.649629	0.730934	0.369451
Er	2.18176	2.6522	1.72709	1.54823	2.02141	0.982464	1.32807	1.95694	1.51471	2.02381	1.91818	2.03501	1.0275
Tm	0.30836	0.363865	0.240073	0.238455	0.30007	0.132698	0.189555	0.263433	0.214485	0.307286	0.307059	0.291803	0.134815
Yb	2.26051	1.91501	1.55826	1.56263	1.84355	0.846058	1.28772	1.71997	1.48912	1.91241	1.85394	2.01955	0.972288
Lu	0.332801	0.335832	0.23677	0.216727	0.300547	0.125123	0.177161	0.280931	0.198873	0.267403	0.254833	0.292803	0.125457
Hf	0.862332	0.728714	0.645179	0.509954	0.80943	0.18961	0.322553	0.830051	0.500822	0.745769	0.954557	0.869292	0.185386
Ta	0	0.00548785	0.000730818	0.00231725	0.0001608	0.000648026	0	0.00140317	0.000680133	0.00425663	0.00649673	0.00439123	0.000608861
Pb	0.0122192	0.043991	0.00685391	0.0662729	0.0787596	0.00497629	0.00304096	0.0222904	0.0158835	0.129816	0.0897883	0.0999513	0.00687216
Th	0.00147911	0	0	0.00116696	0.000561864	0.00233425	0	0.00307883	0.000201239	0.000466241	0.00298149	0.00386683	0
U	0	0	0.000906113	0.0268527	0.091057	0.000232199	0	0	0.00375234	0.00927865	0.00594999	0.00157234	0.000716434
S1 Table 1. Continued
Sample	E82R3W58-02	E82R3W58-03	E82R3W58-04	E82R3W58-05	E82R3W58-06	E82R3W58-07	E83R3W16-01	E83R3W16-02	E83R3W16-03	E83R3W16-04	E83R3W16-05	E83R3W16-06	E83R3W16-07
Subunit	1d	1d	1d	1d	1d	1d	1d	1d	1d	1d	1d	1d	1d
Depth (mbsf)	1555.28	1555.28	1555.28	1555.28	1555.28	1555.28	1564.38	1564.38	1564.38	1564.38	1564.38	1564.38	1564.38
SiO2	51.304	52.117	52.188	52.627	51.928	51.204	53.0256	52.2599	52.4428	53.5595	53.5546	50.4819	53.0278
TiO2	0.541	0.552	0.524	0.525	0.591	0.912	0.3109	0.2824	0.2721	0.2735	0.3356	0.4704	0.2188
Al2O3	5.028	3.811	3.793	3.87	4.343	5.254	2.8111	2.6183	2.4795	2.3271	2.8934	3.5205	1.6792
Cr2O3	0.07	0.338	0.16	0.176	0.301	0.174	0.3271	0.3165	0.3435	0.3058	0.3408	0.3261	0.188
FeO	6.926	5.876	6.031	6.429	7.097	6.984	5.2144	5.3686	5.1158	5.1441	5.2936	5.8861	6.132
MnO	0.17	0.089	0.199	0.142	0.177	0.163	0.1361	0.1439	0.1264	0.1532	0.1282	0.1597	0.1917
MgO	16.64	16.961	16.624	17.272	17.037	16.47	17.7446	18.1387	17.8022	18.3022	18.0233	17.023	19.544
CaO	19.59	19.966	20.326	19.7	18.81	19.355	20.6168	20.2919	20.6999	20.3333	20.259	20.1511	18.1583
Na2O	0.256	0.234	0.252	0.205	0.223	0.241	0.1931	0.2186	0.1781	0.185	0.1887	0.177	0.1481
Total	100.525	99.944	100.097	100.946	100.507	100.757	100.38	99.6388	99.4603	100.584	101.017	98.1958	99.2879
Si4+	1.86693	1.90535	1.90743	1.90551	1.89174	1.86269	1.92427	1.90683	1.9194	1.93686	1.93053	1.87643	1.93728
Al3+(tet)	0.13307	0.09465	0.09257	0.09449	0.10826	0.13731	0.07573	0.09317	0.0806	0.06314	0.06947	0.12357	0.06272
Al3+(oct)	0.0826	0.06957	0.07084	0.07068	0.07823	0.08797	0.04451	0.01944	0.02636	0.03606	0.05347	0.03068	0.00959
Ti4+	0.01481	0.01518	0.0144	0.0143	0.01619	0.02495	0.00849	0.00775	0.00749	0.00744	0.0091	0.01315	0.00601
Cr3+	0.00201	0.00977	0.00462	0.00504	0.00867	0.005	0.00939	0.00913	0.00994	0.00874	0.00971	0.00958	0.00543
Fe3+	0.03691	0.00155	0.00615	0.00457	0.00472	0.01144	0.01845	0.06456	0.04196	0.01643	0.00128	0.06976	0.04616
Fe2+	0.17387	0.17811	0.1782	0.19011	0.2115	0.20104	0.1398	0.09926	0.11463	0.13914	0.15831	0.11322	0.14119
Mn2+	0.00524	0.00276	0.00616	0.00436	0.00546	0.00502	0.00418	0.00445	0.00392	0.00469	0.00391	0.00503	0.00593
Mg2+	0.90265	0.92435	0.90574	0.93226	0.92522	0.89314	0.95992	0.9866	0.97127	0.98663	0.96851	0.94324	1.06437
Ca2+	0.76385	0.78213	0.79602	0.7643	0.73425	0.75444	0.80167	0.79334	0.81179	0.78789	0.78251	0.80258	0.71082
Na1+	0.01806	0.01659	0.01786	0.01439	0.01575	0.017	0.01359	0.01547	0.01264	0.01297	0.01319	0.01276	0.01049
100*Mg/(Mg+Fe2+)	83.8489	83.8443	83.56	83.0617	81.3938	81.6264	87.2877	90.8589	89.4438	87.6405	85.9507	89.2831	88.2884
Wo (%)	41.505	41.5014	42.3425	40.5105	39.2443	40.8109	42.1622	42.217	42.7776	41.1717	40.9836	43.1719	37.0917
En (%)	49.0472	49.0476	48.1788	49.4128	49.4512	48.3139	50.4851	52.5008	51.182	51.5572	50.7249	50.7381	55.5406
Fs (%)	9.44774	9.45098	9.47872	10.0766	11.3045	10.8751	7.35268	5.28221	6.04046	7.2711	8.29148	6.08999	7.36764
Sc	128.638	123.685	128.568	148.033	115.044	147.449	106.057	105.791	107.238	91.5664	106.138	128.7	123.431
Ti	2941.85	2814.41	4334.41	4989.09	3503.48	4146.19	2303.31	2217.86	2223.95	1890	2228.01	2805.3	2893.94
V	346.094	318.043	426.355	477.093	351.283	428.062	289.077	276.551	281.849	241.77	278.766	317.892	315.763
Cr	1585.38	1412.24	649.825	1019.2	804.849	1279.8	2216.24	2105.62	2171.94	1773.68	2118.84	1426.15	1118.15
Mn	1178.9	1642.43	1330.61	1510.45	1399.07	1265.83	1124.66	1184.14	1083.35	1098.57	1158.24	1694.19	1553.42
Co	41.8119	58.6435	46.6691	54.2275	52.7757	45.3189	43.5424	44.6667	43.4661	42.6705	43.6848	60.3929	53.218
Ni	169.137	223.951	158.122	202.979	181.02	176.175	196.89	197.146	193.373	192.453	193.643	223.727	194.176
Rb	3.19956	1.20733	0.853597	0.35796	3.86597	1.01919	0	0.00399746	0.0106049	0	0	0.925156	2.4621
Sr	7.35351	6.37397	14.7525	6.66787	22.0389	7.52288	6.72309	6.07172	6.92289	6.10182	6.09781	6.32275	5.86752
Y	14.5134	12.3683	21.7695	18.9869	15.0249	18.9681	9.24143	9.23531	8.78276	7.56013	9.22067	12.5923	12.8183
Zr	11.6236	8.52018	17.9271	18.01	23.9979	21.2179	3.59075	3.45506	3.52256	2.55539	3.46718	11.7245	14.5805
Nb	0.00888147	0.0478379	0.0249954	0.0301491	0.0512693	0.029355	0.0041529	0.00125374	0.000265417	0.0065256	0.0042597	0.0336966	0.032424
Ba	0.601121	0.496818	0.878387	0.213191	3.77235	0.329012	0	0	0.00804985	0	1.31475	0.314978	0.432201
La	0.0922942	0.0827696	0.189199	0.128374	0.11437	0.161029	0.0624592	0.0506445	0.0564403	0.049418	0.0482984	0.0870469	0.0718432
Ce	0.562647	0.446496	0.932661	0.782605	0.683784	0.77587	0.390834	0.326831	0.368344	0.30775	0.346526	0.416009	0.434052
Pr	0.16759	0.13636	0.266822	0.217846	0.186664	0.227369	0.0897815	0.0982871	0.106385	0.090693	0.105328	0.127237	0.122949
Nd	1.38839	1.09676	2.14428	1.88663	1.46531	2.0495	1.00225	0.899083	0.797257	0.787393	0.897514	1.05558	1.06762
Sm	0.881166	0.659131	1.32675	1.35199	0.937289	1.03272	0.648857	0.533968	0.558649	0.494571	0.660093	0.737109	0.656989
Eu	0.325348	0.30078	0.537415	0.434695	0.382271	0.503685	0.236717	0.245366	0.237195	0.191243	0.257218	0.312647	0.318092
Gd	1.69247	1.39783	2.50539	2.26676	1.64955	2.32272	1.10097	1.16987	1.07127	0.912683	1.07196	1.37867	1.39894
Tb	0.34279	0.262741	0.507317	0.420738	0.303914	0.399046	0.209064	0.201732	0.205354	0.168506	0.207689	0.30132	0.24817
Dy	2.60319	2.15712	3.9365	3.20518	2.56541	3.14986	1.70224	1.6309	1.54798	1.2717	1.64867	2.13378	2.26838
Ho	0.534024	0.463766	0.808797	0.750148	0.583133	0.661233	0.342759	0.355726	0.352886	0.292339	0.350316	0.493283	0.501959
Er	1.54077	1.38124	2.48564	2.03671	1.75851	1.96772	1.04688	1.0666	1.04431	0.844649	0.977421	1.43539	1.38566
Tm	0.217739	0.206719	0.352688	0.286336	0.262838	0.284536	0.133629	0.139581	0.138494	0.114203	0.142722	0.22432	0.237109
Yb	1.43213	1.36073	2.29192	1.97554	1.76433	1.86702	0.850089	0.884374	0.802978	0.86364	0.910683	1.41542	1.5105
Lu	0.240094	0.208199	0.33571	0.323227	0.249586	0.303842	0.140109	0.13973	0.138875	0.112151	0.14114	0.231591	0.198073
Hf	0.527702	0.367246	0.80103	0.924514	0.833766	0.886032	0.217249	0.197922	0.19026	0.147611	0.192451	0.436456	0.595487
Ta	0.0024558	0.00541914	0.00283818	0.0029671	0.00875146	0.00510943	0	0.000724375	0.000245014	0	0	0.00232248	0.00727274
Pb	0.0616116	0.0352479	0.24505	0.0496297	0.145443	0.152424	0.00682414	0.00250101	0	0.00202075	0.00193507	0.0590967	0.0583892
Th	0.000706458	0.000712607	0.00243706	0	0.00591422	0.00298104	0	0.00015963	0	0.00374377	0.00196207	0	0
U	0.0175758	0.0165426	0.00778946	0.00816519	0.0203816	0.00752854	0	8.73941e-05	0.0310687	0	0.000578646	0.0045646	0.0189528
S1 Table 1. Continued
Sample	E83R1W121-01	E84R1W34-01	E84R1W34-02	E84R1W34-03	E84R1W34-04	E84R1W34-05	E84R1W34-06	E84R1W34-07	E84R1W34-08	E84R1W34-09	E85R1W134-01	E85R1W134-02	E85R1W134-03
Subunit	1d	1e	1e	1e	1e	1e	1e	1e	1e	1e	1e	1e	1e
Depth (mbsf)	1562.61	1571.44	1571.44	1571.44	1571.44	1571.44	1571.44	1571.44	1571.44	1571.44	1580.44	1580.44	1580.44
SiO2	51.807	53.027	51.076	51.823	51.503	51.233	52.432	51.91	51.596	50.141	53.3617	53.6018	50.3339
TiO2	0.525	0.305	0.756	0.486	0.626	0.448	0.348	0.52	0.569	0.748	0.314	0.1841	0.3151
Al2O3	3.66	2.738	5.135	4.832	4.199	4.352	3.933	3.477	4.489	5.303	2.6432	1.9974	4.0769
Cr2O3	0.105	0.245	0.164	0.05	0.011	0.138	0.217	0.238	0.099	0.009	0.3612	0.6377	0.6884
FeO	6.864	5.755	6.787	7.499	8.592	6.652	6.374	5.494	7.178	7.925	5.3338	5.1618	4.8515
MnO	0.193	0.107	0.12	0.126	0.172	0.182	0.191	0.201	0.153	0.126	0.1414	0.1648	0.1384
MgO	17.383	17.673	16.144	16.871	16.781	16.667	17.29	16.346	17.349	15.825	17.6514	20.4167	17.8586
CaO	18.516	20.119	19.758	18.534	18.088	19.63	19.237	21.103	18.113	18.297	20.6088	17.7282	19.7614
Na2O	0.198	0.176	0.209	0.23	0.273	0.212	0.243	0.197	0.244	0.341	0.1945	0.134	0.1658
Total	99.251	100.145	100.149	100.451	100.245	99.514	100.265	99.486	99.79	98.715	100.61	100.026	98.19
Si4+	1.90748	1.93133	1.87012	1.88865	1.88674	1.88328	1.9092	1.90997	1.88876	1.8648	1.93424	1.93602	1.86055
Al3+(tet)	0.09252	0.06867	0.12988	0.11135	0.11326	0.11672	0.0908	0.09003	0.11124	0.1352	0.06576	0.06398	0.13945
Al3+(oct)	0.06632	0.04887	0.09173	0.09622	0.06805	0.07185	0.078	0.06077	0.08245	0.09726	0.04717	0.02106	0.03818
Ti4+	0.01454	0.00835	0.02082	0.01332	0.01725	0.01239	0.00953	0.01439	0.01566	0.02092	0.00856	0.005	0.00876
Cr3+	0.00306	0.00706	0.00475	0.00144	0.000318611	0.00401	0.00625	0.00692	0.00287	0.000264649	0.01035	0.01821	0.02012
Fe3+	0.0082	0.00847	0.0066	0.0033	0.02979	0.0312	0.00466	0.00761	0.01191	0.02042	0.0048	0.02409	0.07552
Fe2+	0.20316	0.16683	0.20123	0.22526	0.23345	0.1733	0.18945	0.16145	0.20785	0.22608	0.1569	0.13183	0.07446
Mn2+	0.00602	0.0033	0.00372	0.00389	0.00534	0.00567	0.00589	0.00626	0.00474	0.00397	0.00434	0.00504	0.00433
Mg2+	0.95408	0.95953	0.88116	0.91656	0.9164	0.9133	0.93851	0.89656	0.94673	0.87735	0.95378	1.09928	0.98405
Ca2+	0.73049	0.78516	0.77516	0.72376	0.71001	0.77318	0.75056	0.83198	0.71047	0.72914	0.80044	0.6861	0.7827
Na1+	0.01414	0.01243	0.01484	0.01625	0.01939	0.01511	0.01716	0.01405	0.01732	0.02459	0.01367	0.00938	0.01188
100*Mg/(Mg+Fe2+)	82.4444	85.1886	81.4087	80.2719	79.6974	84.0512	83.2042	84.7402	81.9978	79.5112	85.8735	89.2918	92.9656
Wo (%)	38.6967	41.0752	41.7303	38.7953	38.1753	41.5737	39.9549	44.0206	38.094	39.788	41.8832	35.7865	42.5099
En (%)	50.5413	50.1972	47.4368	49.13	49.2726	49.1079	49.96	47.4371	50.7617	47.8753	49.907	57.3371	53.4459
Fs (%)	10.762	8.72758	10.8329	12.0747	12.5521	9.31842	10.0851	8.54236	11.1443	12.3366	8.20972	6.87635	4.04424
Sc	149.141	133.931	122.349	127.326	123.15	126.77	130.664	152.301	129.849	105.888	111.383	91.2679	109.647
Ti	3820.19	4126.26	3357.03	4927.01	4720.66	3062.19	3234.4	4148.79	3304.67	5384.47	2257.06	1585.74	2600.65
V	434.224	417.359	348.392	453.46	409.273	346.173	355.513	418.806	349.9	440.498	295.377	235.931	347.896
Cr	1185.24	1412.73	1194.15	688.666	848.02	1110.84	1445.21	1449.41	1194.41	298.788	2311.8	4781.99	4551.32
Mn	1318.95	1355.15	1325.71	1338.66	1245.33	1376.31	1095.48	1554.88	1189.93	1516.24	1090.88	1018.98	1050.21
Co	47.4632	49.1914	45.9217	47.5896	43.7548	48.502	39.9073	51.9128	41.5706	56.2483	43.344	39.116	42.2887
Ni	179.524	186.495	163.512	162.703	145.463	178.84	155.772	195.228	155.369	137.866	172.344	236.47	261.267
Rb	0.291915	2.0123	1.5307	1.97149	1.66014	3.05727	0.213134	0.670493	0.0438466	3.9894	0.0286655	0.719881	0.0137967
Sr	6.01114	14.7338	12.1922	10.5838	8.34476	10.8253	6.99295	6.8733	5.93298	73.9609	6.8361	3.9333	4.73869
Y	15.0335	17.9402	14.6942	20.6492	17.4626	15.0165	14.2671	16.5963	13.7427	20.9497	9.27623	7.55057	10.19
Zr	16.7941	14.1253	12.9033	17.5645	17.6781	10.1292	9.52194	17.5154	11.9533	33.4612	3.65426	4.36464	6.28643
Nb	0.00949459	0.0328375	0.0372956	0.0337411	0.0298673	0.01937	0.0151683	0.0217375	0.0161212	0.0847338	0.000148838	0.00863308	0.00645084
Ba	0.177446	0.625837	0.805075	1.61523	0.682938	0.768029	0.276778	0.588815	0.079329	19.8098	0	0.210875	0.168051
La	0.0784549	0.166848	0.215897	0.181631	0.134204	0.110142	0.109051	0.116702	0.0941908	0.249778	0.0534844	0.0461959	0.0580047
Ce	0.680414	0.890623	0.889298	0.930551	0.82163	0.679947	0.593591	0.63518	0.52737	1.22497	0.385664	0.24415	0.343426
Pr	0.161049	0.223902	0.223811	0.256279	0.215384	0.186063	0.158813	0.198534	0.160867	0.28121	0.106158	0.0756878	0.121167
Nd	1.47207	2.03563	1.68929	2.04857	1.81613	1.67143	1.51002	1.53413	1.31333	2.5031	0.886532	0.702521	0.891961
Sm	0.806388	1.1639	1.07432	1.08352	1.24881	0.940331	0.747061	0.975669	0.833531	1.40762	0.602662	0.430695	0.659174
Eu	0.462138	0.49163	0.411772	0.543024	0.447869	0.358725	0.359859	0.413716	0.349704	0.503499	0.224162	0.174914	0.269149
Gd	1.79193	2.08131	1.79448	2.2492	2.30214	1.6998	1.89759	2.00837	1.54789	2.5557	1.16767	0.830348	1.32381
Tb	0.345986	0.385076	0.337935	0.425309	0.406655	0.323175	0.321128	0.327044	0.30791	0.464197	0.228018	0.166406	0.22175
Dy	3.07826	3.12294	2.57705	3.66355	3.0741	2.75673	2.47638	2.92478	2.31961	3.71234	1.59622	1.30668	1.76545
Ho	0.602148	0.665885	0.544542	0.782955	0.67305	0.627967	0.567986	0.606648	0.54919	0.768984	0.35682	0.280889	0.399524
Er	1.64506	2.08133	1.80236	2.38242	2.00321	1.66115	1.54949	1.89323	1.55776	2.63952	1.02871	0.840645	1.19889
Tm	0.274556	0.273805	0.231458	0.336836	0.255174	0.236984	0.262404	0.256383	0.225135	0.332056	0.151559	0.135648	0.142694
Yb	1.96194	1.91129	1.64693	2.1549	2.02008	1.50806	1.60938	1.61879	1.47442	2.28487	0.898441	0.821816	1.08644
Lu	0.24812	0.281708	0.211797	0.328756	0.271921	0.237594	0.253526	0.259101	0.216508	0.349171	0.136978	0.115427	0.154844
Hf	0.777663	0.709402	0.57709	0.884999	0.884725	0.588894	0.491731	0.886912	0.570632	1.22664	0.204442	0.247592	0.357434
Ta	0.00139737	0.00426812	0.00190606	0.00584915	0.00086304	0.00196457	0.000568755	0.000611523	0.000917083	0.0132793	0	0.00213617	0.00126693
Pb	0.055031	0.0394995	0.0936725	0.0743854	0.0740867	0.0991083	0.0414559	0.0701478	0.0300504	0.258939	0.0108962	0.0066455	0.0024953
Th	0	0.00609042	0.00605256	0.00567586	0.00136005	0	0.00245893	0	0	0.00246432	0.000676344	0.00226099	0.00217505
U	0.00557736	0.00756169	0.0191113	0.0250086	0.0149337	0.0137933	0.00465167	0.013087	0.000668972	0.0342195	0.00346008	0.0040559	0.00111277
S1 Table 1. Continued
Sample	E85R1W134-04	E85R1W134-05	E85R1W134-06	E85R1W134-07	E85R1W134-08	E85R1W134-09	E85R1W134-10	E85R1W134-11	E86R1W29-01	E86R1W29-02	E87R1W86-01	E87R1W86-02	E87R1W86-03
Subunit	1e	1e	1e	1e	1e	1e	1e	1e	1e	1e	1e	1e	1e
Depth (mbsf)	1580.44	1580.44	1580.44	1580.44	1580.44	1580.44	1580.44	1580.44	1585.19	1586.42	1594.86	1594.86	1594.86
SiO2	51.1	50.5158	51.5147	51.0717	53.2405	52.4039	51.2136	51.185	51.354	52.839	51.4455	54.2203	51.4826
TiO2	0.3502	0.2647	0.2811	0.5863	0.2756	0.2691	0.2952	0.2563	0.287	0.211	0.4086	0.166	0.4232
Al2O3	4.2688	3.6657	4.3259	5.3905	2.5436	2.5795	2.7249	3.6806	4.213	3.237	4.3657	2.0524	4.7228
Cr2O3	0.9438	1.2918	1.3094	0.8664	0.4143	0.4008	0.4115	1.0827	1.485	1.05	0.8117	0.5309	0.8473
FeO	4.8714	4.2593	4.5588	4.8422	5.3407	5.0724	5.3382	4.4779	4.505	4.779	5.0363	5.3451	5.3208
MnO	0.1296	0.1016	0.1202	0.1123	0.1452	0.1388	0.1334	0.1183	0.055	0.095	0.132	0.1741	0.1444
MgO	17.8932	17.538	17.5509	16.5749	17.9072	17.8365	17.4342	17.7772	17.044	17.816	17.5661	20.2192	18.1294
CaO	19.868	20.7517	20.3827	20.6891	20.1004	20.7938	20.5315	20.3447	20.187	19.935	19.8183	17.8276	19.0859
Na2O	0.1664	0.2074	0.1873	0.1832	0.2063	0.1795	0.1878	0.1714	0.222	0.266	0.1892	0.143	0.19
Total	99.5914	98.596	100.231	100.317	100.174	99.6743	98.2703	99.0941	99.352	100.228	99.7734	100.679	100.346
Si4+	1.8648	1.86256	1.87086	1.85837	1.93611	1.91358	1.8985	1.8775	1.88468	1.91871	1.87668	1.94823	1.86439
Al3+(tet)	0.1352	0.13744	0.12914	0.14163	0.06389	0.08642	0.1015	0.1225	0.11532	0.08129	0.12332	0.05177	0.13561
Al3+(oct)	0.04842	0.02187	0.05604	0.08957	0.04514	0.02461	0.01757	0.03663	0.06693	0.05726	0.06439	0.03516	0.06599
Ti4+	0.00961	0.00734	0.00768	0.01604	0.00754	0.00739	0.00823	0.00707	0.00792	0.00576	0.01121	0.00449	0.01153
Cr3+	0.02723	0.03766	0.0376	0.02493	0.01191	0.01157	0.01206	0.0314	0.04309	0.03015	0.02341	0.01508	0.02426
Fe3+	0.0521	0.07806	0.03334	0.00798	0.00632	0.04817	0.06891	0.05253	0.00526	0.00108	0.02648	0.00252	0.03564
Fe2+	0.09657	0.05328	0.10513	0.13938	0.15611	0.10674	0.09659	0.08484	0.13302	0.14405	0.12717	0.1581	0.12551
Mn2+	0.00401	0.00317	0.0037	0.00346	0.00447	0.00429	0.00419	0.00368	0.00171	0.00292	0.00408	0.0053	0.00443
Mg2+	0.97339	0.96395	0.95016	0.89907	0.97074	0.97092	0.96342	0.97205	0.93245	0.9644	0.95523	1.08301	0.9787
Ca2+	0.77689	0.81984	0.79317	0.80665	0.78322	0.8136	0.81553	0.79962	0.79383	0.77565	0.77465	0.68638	0.7406
Na1+	0.01177	0.01483	0.01319	0.01293	0.01455	0.01271	0.0135	0.01219	0.0158	0.01873	0.01338	0.00996	0.01334
100*Mg/(Mg+Fe2+)	90.9744	94.7622	90.0378	86.5781	86.1463	90.0952	90.8878	91.9727	87.5154	87.0044	88.2511	87.2614	88.6335
Wo (%)	42.0656	44.6277	42.9097	43.7187	41.0048	43.019	43.4824	43.071	42.6954	41.1683	41.7139	35.6101	40.1452
En (%)	52.7055	52.4719	51.403	48.7272	50.8222	51.3371	51.3676	52.3591	50.1506	51.1861	51.4381	56.1875	53.0517
Fs (%)	5.22896	2.90041	5.68725	7.55403	8.17301	5.6439	5.14999	4.56996	7.15407	7.64556	6.84798	8.20245	6.80317
Sc	113.557	122.198	120.576	123.389	102.319	93.9205	102.903	114.234	132.999	93.2109	126.347	102.387	120.105
Ti	2291.19	2483.03	2647.83	2976.12	2013.88	1853.35	2079.45	2337.63	2862.04	1509.14	2983.91	1781.46	2455.9
V	332.387	343.331	357.217	376.259	280.318	261.464	280.985	312.517	375.904	222.878	394.51	249.759	335.091
Cr	5087.81	5837.09	5776.9	5236.38	2600.9	2411.41	2149.96	2714.62	7019.02	5293.97	3805.48	3862.57	4737.32
Mn	936.435	1093.83	1063.58	1034.8	1111.03	983.977	1082.61	1151.9	1021.29	1225.97	967.125	1160.98	1038.95
Co	37.946	44.0747	41.9288	41.1632	42.5981	39.7604	43.3363	45.5205	40.079	49.4533	38.9139	42.6684	41.4616
Ni	236.796	267.55	244.449	256.595	180.907	173.333	184.767	192.108	232.704	301.74	220.244	240.455	233.103
Rb	0.104515	1.88564	0.0079914	0.938387	0	0.014042	0.0879454	0.00377157	0.724257	2.98776	0.00851553	0.00971015	0.0125434
Sr	4.91852	5.80774	4.97404	5.63809	5.75624	5.87822	6.06056	6.05279	5.3921	5.17714	5.34726	3.38315	4.85559
Y	10.9672	11.1141	10.5657	11.1951	8.31512	7.0363	8.48196	10.1309	10.4997	7.24413	12.4443	8.83294	11.1344
Zr	5.51981	10	8.30708	9.48502	3.01684	2.68122	3.13865	4.15282	12.7743	8.91194	12.63	4.37549	10.0595
Nb	0.0051355	0.0178239	0.0157103	0.0271898	0.000692227	0.00760899	0.000884355	0.0030111	0.0109222	0.0161156	0.025217	0.00752326	0.0216983
Ba	0.0254419	0.498199	0.0813649	0.420606	0.0167504	0	0.0223735	0.0109232	0.11848	0.564432	0.360569	0.0354393	0.226722
La	0.0579158	0.0663157	0.0464994	0.0621985	0.0408308	0.0375216	0.0407446	0.0462157	0.0635643	0.0289941	0.0653467	0.0332565	0.052515
Ce	0.397995	0.409764	0.342719	0.387851	0.310203	0.252622	0.289006	0.335941	0.389469	0.197623	0.45481	0.210262	0.340239
Pr	0.118841	0.126743	0.105388	0.13614	0.089461	0.0738772	0.103195	0.115531	0.120445	0.0586725	0.133485	0.0645209	0.104574
Nd	0.969143	1.11811	0.915633	1.05717	0.799913	0.66935	0.823572	0.853861	1.06764	0.534723	1.02026	0.617138	0.904372
Sm	0.648778	0.702164	0.667234	0.587074	0.582227	0.465411	0.545076	0.642902	0.54436	0.315291	0.789706	0.504801	0.626551
Eu	0.298493	0.274496	0.234248	0.279777	0.215373	0.184972	0.217345	0.244853	0.246689	0.170516	0.298055	0.213438	0.229824
Gd	1.21692	1.32154	1.27642	1.49614	0.91018	0.822442	0.98071	1.23	1.18274	0.797458	1.45285	0.906763	1.1052
Tb	0.250009	0.257676	0.225675	0.26898	0.189351	0.150035	0.182623	0.241199	0.233143	0.132217	0.270945	0.179496	0.239032
Dy	2.02642	2.01233	1.85065	2.00832	1.37364	1.1591	1.47426	1.72451	1.69262	1.13083	2.1367	1.47384	1.93753
Ho	0.424301	0.427156	0.403331	0.43372	0.32163	0.274751	0.333459	0.354979	0.402992	0.266993	0.462261	0.326172	0.426377
Er	1.27762	1.25125	1.18179	1.32362	0.938612	0.783694	0.908414	1.14623	1.11694	0.723885	1.39759	1.00542	1.27423
Tm	0.186078	0.161812	0.165453	0.173282	0.125686	0.111797	0.130804	0.140055	0.155111	0.120501	0.22607	0.142157	0.187207
Yb	1.09814	1.14519	1.07745	1.29897	0.826628	0.789585	0.881211	0.96533	1.13656	0.835703	1.69733	0.946481	1.36827
Lu	0.170729	0.181504	0.155202	0.162174	0.120585	0.100883	0.113432	0.144392	0.164808	0.116227	0.252991	0.148901	0.217379
Hf	0.34235	0.485685	0.440462	0.490011	0.16672	0.158447	0.17859	0.243119	0.574881	0.34053	0.58182	0.281732	0.422308
Ta	0.00126374	0.00485572	0.00292116	0.00207752	0.00129166	2.88449e-05	0.00182317	0	0	0.00153106	0.00194583	0.000361059	0.000706353
Pb	0.00381516	0.0264774	0.0150277	0.0218373	0	0	0.0285754	0.00762306	0.0908347	0.119909	0.0364181	0.0219006	0.0254846
Th	0	0.00110685	0.00197781	0	0.000366409	0	0	0	0.000240188	0	0.000875825	0.000134806	0
U	4.02829e-05	0.0489601	0.00420018	0.00661888	0	0.00100067	0.00130315	0.0021049	0.00351736	0.0130536	0.004892	0.00111233	0.0225359
S1 Table 1. Continued
Sample	E87R1W86-04	E88R1W41-01	E88R1W41-02	E88R1W41-03	E88R1W41-04	E88R1W41-05	E88R1W41-06	E88R1W41-07	E88R1W41-08	E88R1W41-09	E88R1W41-10	E88R1W41-11	E88R1W41-12
Subunit	1e	1e	1e	1e	1e	1e	1e	1e	1e	1e	1e	1e	1e
Depth (mbsf)	1594.86	1603.51	1603.51	1603.51	1603.51	1603.51	1603.51	1603.51	1603.51	1603.51	1603.51	1603.51	1603.51
SiO2	51.7588	51.4271	52.3562	52.6613	52.7289	50.8676	54.2363	54.2431	51.8453	52.425	51.541	53.5486	51.6866
TiO2	0.3367	0.4637	0.2981	0.522	0.4023	0.7355	0.252	0.2356	0.4879	0.3556	0.4949	0.27	0.3913
Al2O3	4.1283	4.2867	3.4086	3.9191	3.0547	5.1733	2.0548	1.8575	4.5167	3.9483	4.3552	2.4718	3.9091
Cr2O3	0.7136	0.5568	0.6681	0.1848	0.0707	0.0623	0.2546	0.3474	0.3721	0.5088	0.4278	0.445	0.6479
FeO	4.9138	5.9359	5.2453	6.1747	6.1883	7.9918	6.7148	6.2031	6.2353	5.6274	6.3036	5.3757	5.2864
MnO	0.12	0.1542	0.1442	0.1552	0.1767	0.175	0.2114	0.1884	0.15	0.1242	0.1841	0.1684	0.1208
MgO	17.4291	17.2912	17.6327	17.5424	17.3637	15.6014	20.1014	19.4437	17.7238	17.2069	17.8542	18.4273	17.149
CaO	20.2742	20.3531	21.365	20.5903	20.9653	20.434	17.8191	19.0381	19.8436	20.9174	19.6508	20.454	21.3555
Na2O	0.1972	0.1993	0.1939	0.2119	0.2067	0.233	0.1417	0.2375	0.191	0.2377	0.2082	0.1581	0.1892
Total	99.8717	100.668	101.312	101.962	101.157	101.274	101.786	101.794	101.366	101.351	101.02	101.319	100.736
Si4+	1.88658	1.86441	1.8835	1.88516	1.90422	1.84967	1.93395	1.93593	1.86451	1.88775	1.85922	1.92365	1.87206
Al3+(tet)	0.11342	0.13559	0.1165	0.11484	0.09578	0.15033	0.06605	0.06407	0.13549	0.11225	0.14078	0.07635	0.12794
Al3+(oct)	0.06394	0.04758	0.02804	0.05052	0.03425	0.0714	0.02032	0.01407	0.05597	0.05533	0.04439	0.02831	0.03895
Ti4+	0.00923	0.01264	0.00807	0.01405	0.01093	0.02011	0.00676	0.00632	0.0132	0.00963	0.01343	0.00729	0.01066
Cr3+	0.02057	0.01596	0.019	0.00523	0.00202	0.00179	0.00718	0.0098	0.01058	0.01449	0.0122	0.01264	0.01855
Fe3+	0.0244	0.06078	0.06685	0.04569	0.05214	0.05334	0.03483	0.04398	0.05587	0.03976	0.0719	0.03183	0.0624
Fe2+	0.12539	0.1192	0.09097	0.13917	0.13477	0.1897	0.16541	0.14117	0.13167	0.1297	0.11827	0.12968	0.09773
Mn2+	0.0037	0.00474	0.00439	0.00471	0.00541	0.00539	0.00639	0.0057	0.00457	0.00379	0.00563	0.00512	0.00371
Mg2+	0.94701	0.93446	0.9456	0.93613	0.93476	0.84568	1.06849	1.03446	0.95017	0.92363	0.96008	0.9868	0.92592
Ca2+	0.79182	0.79063	0.82356	0.78979	0.81127	0.79616	0.68083	0.72805	0.76466	0.80707	0.75954	0.78732	0.82879
Na1+	0.01394	0.01401	0.01353	0.01471	0.01447	0.01643	0.0098	0.01644	0.01332	0.0166	0.01456	0.01101	0.01329
100*Mg/(Mg+Fe2+)	88.3075	88.6872	91.2244	87.0576	87.3994	81.6785	86.5944	87.9916	87.8294	87.6863	89.0322	88.3852	90.4525
Wo (%)	42.4746	42.869	44.2745	42.3461	43.1343	43.4695	35.5572	38.2444	41.4115	43.3812	41.3268	41.3552	44.7406
En (%)	50.7991	50.6679	50.8352	50.1921	49.7003	46.1732	55.8038	54.3398	51.458	49.6469	52.238	51.8333	49.9835
Fs (%)	6.72631	6.46311	4.89027	7.4618	7.1654	10.3573	8.63896	7.41584	7.13054	6.97188	6.43518	6.81149	5.27589
Sc	119.563	126.989	143.406	140.824	148.325	142.748	133.924	135.56	140.384	121.864	146.954	152.952	158.006
Ti	2716.98	3568.47	3076.7	3463.73	3162.89	4963.91	3385.65	3120.84	2996.34	2780.92	3717.37	3860.05	3621.03
V	362.861	406.528	395.92	414.301	410.92	491.281	401.357	380.722	362.524	354.885	420.481	436.809	424.594
Cr	4478.61	1473.4	3163.33	1996.07	4517.95	1393.47	1910.72	3154.5	3808.11	2623.96	3052.36	3199.31	3923.26
Mn	922.398	1126.63	1124.05	1283.29	1316.83	1361.76	1498.76	1067.12	1435.25	1127.47	1308.47	1414.93	1090.74
Co	37.789	42.6001	42.2442	46.1803	47.584	48.5715	54.0464	40.6755	49.8698	42.9564	47.2409	50.5776	42.6565
Ni	216.596	185.894	201.154	195.078	231.904	178.362	202.196	192.168	239.971	213.694	217.301	233.265	207.106
Rb	0.00403824	0.0126743	0.111546	0	0.0604917	0.103961	0.346492	0.0839771	0.0731179	0.0870626	0.216796	0.279311	0.0378819
Sr	5.69534	6.07269	6.9428	6.16322	6.33128	14.5678	7.60101	6.42689	5.12731	6.32549	5.7101	5.9823	7.03879
Y	10.9566	15.4698	14.8295	18.1482	15.1954	19.306	18.5714	13.4173	13.8251	12.326	15.4861	15.9901	14.6956
Zr	11.0092	13.6497	18.9114	13.2598	11.5128	30.0478	14.4757	21.1718	14.7074	9.69705	17.8011	18.9966	15.3123
Nb	0.0266112	0.0145825	0.0272467	0.00710614	0.0116759	0.0360051	0.0308673	0.0357414	0.0221297	0.00700184	0.0235888	0.0268436	0.0145815
Ba	0.379653	0.0753472	0.159541	0.0443308	0.0862054	0.555378	0.615201	0.233925	0.126159	0.0482401	0.104789	0.122385	0.0512938
La	0.0697605	0.0887437	0.0912691	0.128809	0.0754106	0.127726	0.145609	0.0760175	0.0737871	0.0732777	0.0796713	0.0868139	0.0920463
Ce	0.373203	0.57633	0.565666	0.686453	0.49333	0.826123	0.811469	0.50693	0.472425	0.438942	0.513254	0.547536	0.616033
Pr	0.105008	0.181703	0.161976	0.196369	0.159659	0.204116	0.198627	0.176284	0.134856	0.134967	0.150161	0.152263	0.150257
Nd	0.898008	1.49103	1.33685	1.56844	1.25556	2.0409	1.90695	1.23442	1.28281	1.10784	1.26462	1.28395	1.47639
Sm	0.584664	0.989292	0.764007	1.07829	0.942861	1.10881	1.14179	0.779964	0.794511	0.704264	0.983088	0.954034	1.0235
Eu	0.253442	0.389512	0.338266	0.459715	0.34698	0.471672	0.394875	0.317615	0.305494	0.322141	0.389945	0.395144	0.395616
Gd	1.16343	1.77834	1.83501	2.35748	1.78622	2.05336	1.86659	1.5891	1.62011	1.43947	1.73457	1.75144	1.63742
Tb	0.231719	0.342391	0.336526	0.372353	0.343535	0.436763	0.363389	0.296311	0.293406	0.261833	0.334267	0.354145	0.358937
Dy	1.90234	2.73856	2.5262	3.13292	2.63577	3.42478	3.27413	2.15921	2.30789	2.13144	2.6095	2.68988	2.47673
Ho	0.394202	0.597389	0.567171	0.672949	0.564201	0.761698	0.724297	0.452125	0.55851	0.466463	0.583653	0.614476	0.541392
Er	1.40265	1.78967	1.63509	2.07776	1.75349	2.18146	2.18742	1.47406	1.53987	1.39381	1.75667	1.81206	1.69001
Tm	0.199011	0.245769	0.229514	0.270266	0.240084	0.336875	0.337374	0.222844	0.224937	0.202021	0.24992	0.25067	0.204784
Yb	1.43082	1.66407	1.55026	1.69514	1.66627	1.96024	2.1477	1.39181	1.60122	1.3206	1.77211	1.87851	1.47373
Lu	0.202495	0.247728	0.209941	0.253015	0.216893	0.305059	0.314139	0.205461	0.217058	0.165577	0.226893	0.23806	0.238699
Hf	0.462555	0.69692	0.707983	0.724338	0.553077	1.28228	0.697569	0.705799	0.644147	0.444008	0.780842	0.782741	0.760838
Ta	0.000282381	0.00163339	0.00146083	0.00475778	5.20746e-05	0.00574588	0.000464892	0.00675245	0	0.00200424	0.00371634	0.00529964	0.00412495
Pb	0.0318522	0.00758861	0.0270013	0.00748084	0.0115448	0.0236416	0	0.0133635	0.0393882	0.0226982	0.037704	0.0288745	0.027589
Th	0.00138458	0.00333758	0.000952849	0.00202988	0	0.00179953	0	0	0.000538445	0.00141315	0.00311206	0.00204519	0.00353225
U	0.00618814	0	0.00376789	0	0.00046425	0.00611711	0.00984528	0.00655064	0.00614516	0.00394784	0.00118445	0.000464699	0.00135004
S1 Table 1. Continued
Sample	E88R1W41-13	E88R1W41-14	E88R1W41-15	E88R1W41-16	E88R1W41-17	E88R1W106-01	E88R1W106-02
Subunit	1e	1e	1e	1e	1e	1f	1f
Depth (mbsf)	1603.51	1603.51	1603.51	1603.51	1603.51	1604.16	1604.16
SiO2	51.0273	50.8599	52.5133	52.3067	52.2729	51.9154	52.2772
TiO2	0.5734	0.6076	0.36	0.4485	0.4086	0.3864	0.3925
Al2O3	5.0466	5.1679	3.7099	3.8849	4.2199	3.5964	3.5095
Cr2O3	0.1012	0.5271	0.4699	0.4159	0.5058	0.5814	0.541
FeO	6.7672	5.7235	5.6868	5.846	6.142	5.4046	5.4856
MnO	0.1458	0.1406	0.1427	0.154	0.1626	0.1427	0.1298
MgO	16.0778	16.5778	17.4862	17.6273	17.913	17.4184	17.4708
CaO	20.8593	21.1688	20.8603	20.8473	19.8452	20.111	20.0408
Na2O	0.2308	0.2205	0.1896	0.2123	0.2211	0.1976	0.1947
Total	100.829	100.994	101.419	101.743	101.691	99.7539	100.042
Si4+	1.85494	1.84019	1.88911	1.87482	1.87317	1.89743	1.90568
Al3+(tet)	0.14506	0.15981	0.11089	0.12518	0.12683	0.10257	0.09432
Al3+(oct)	0.07117	0.06059	0.04642	0.03895	0.05141	0.05237	0.05647
Ti4+	0.01568	0.01653	0.00974	0.01209	0.01101	0.01062	0.01076
Cr3+	0.00291	0.01508	0.01337	0.01179	0.01433	0.0168	0.01559
Fe3+	0.05589	0.06654	0.04485	0.06501	0.05442	0.02616	0.0145
Fe2+	0.14984	0.10665	0.12625	0.11023	0.12965	0.13904	0.15274
Mn2+	0.00449	0.00431	0.00435	0.00468	0.00494	0.00442	0.00401
Mg2+	0.87125	0.89414	0.93772	0.94184	0.95688	0.949	0.94938
Ca2+	0.8125	0.82069	0.80409	0.80066	0.76199	0.78759	0.78279
Na1+	0.01627	0.01547	0.01323	0.01475	0.01536	0.014	0.01376
100*Mg/(Mg+Fe2+)	85.3252	89.3432	88.1345	89.5228	88.0678	87.2211	86.1413
Wo (%)	44.3118	45.0562	43.0441	43.2151	41.2217	41.9905	41.5295
En (%)	47.5161	49.0885	50.1977	50.8354	51.7647	50.5966	50.3674
Fs (%)	8.17211	5.85528	6.75813	5.94948	7.01355	7.41293	8.10309
Sc	156.156	156.938	150.063	129.908	120.337	136.668	129.274
Ti	4111.01	3640.58	3470.24	4366.08	3126.57	2908.82	2931.35
V	470.402	449.301	420.713	474.166	376.24	363.585	357.293
Cr	2457.47	3917.32	3463.22	1205.41	2054.41	3406.1	2937.91
Mn	1574.64	1329.49	1160.58	1400.54	1223.59	1089.9	1266.41
Co	57.2777	48.8695	46.8226	50.0122	46.4479	39.6269	46.3374
Ni	259.279	235.01	206.994	175.675	198.674	179.837	212.576
Rb	0.340205	0	0.359113	0.0580114	0.174046	0.0117135	0.0463729
Sr	6.73244	5.78608	8.07511	7.0193	6.05531	5.64424	7.68118
Y	19.7945	17.0454	15.0381	21.7826	13.2523	12.5797	13.0817
Zr	30.6541	11.0612	15.011	15.9987	14.9203	9.21269	9.31496
Nb	0.0595445	0.00480427	0.00873165	0.00810933	0.00884405	0.00302786	0.0233864
Ba	0.284377	0.000429429	0.195586	0.0580921	0.0730249	0.363069	0.407533
La	0.119991	0.0788647	0.104826	0.138454	0.0766719	0.057595	0.0773811
Ce	0.659239	0.534617	0.555568	0.900649	0.47872	0.470852	0.536778
Pr	0.197035	0.171959	0.148997	0.247256	0.14286	0.136563	0.140133
Nd	1.66533	1.35992	1.37618	2.2995	1.24553	1.00789	1.22382
Sm	1.20406	0.991524	0.80595	1.38516	0.843812	0.781795	0.771988
Eu	0.44935	0.384727	0.394099	0.542725	0.291372	0.308778	0.302307
Gd	2.09683	1.79997	1.62063	2.44529	1.61629	1.46259	1.36472
Tb	0.430947	0.370585	0.336567	0.50506	0.30616	0.251761	0.315023
Dy	3.37676	2.94333	2.56059	3.58989	2.43948	2.2443	2.26524
Ho	0.740798	0.664533	0.572605	0.867132	0.532477	0.483632	0.468541
Er	2.20967	1.96683	1.64693	2.4975	1.49403	1.46286	1.42756
Tm	0.302154	0.283793	0.220515	0.335816	0.223804	0.183932	0.230061
Yb	2.01455	1.78858	1.56222	2.27468	1.37446	1.35029	1.426
Lu	0.349266	0.253796	0.25625	0.305925	0.190179	0.192845	0.224464
Hf	1.15546	0.691851	0.739682	0.869599	0.576213	0.540466	0.560871
Ta	0.00574942	0.000645419	0.000947666	0.000728819	0.0050589	0.000365968	0
Pb	0.0381478	0.0100031	0.0120529	0.0331001	0.0104057	0.0280742	0.00508031
Th	0.00212578	0	0.00276748	0	0.809071	0.000714877	0
U	0.00762481	0	0.00361283	0	0.0038572	0.00113678	0
wt. % for major elements and ppm for trace elements. Cation abundances are calculated based on stoichiometry with 6 oxygen anions. Wo: Wollastonite (Ca2Si2O6), En: Enstatite (Mg2Si2O6), Fs: Ferrosilite (Fe2Si2O6).
