# Supplementary material for: Basalt derived from highly refractory mantle sources during early Izu-Bonin-Mariana arc development
Source: Research Square preprint supplement (doi:10.21203/rs.3.rs-89845/v1), 2020-10-12
Supplement: Supplementary file 7 [file f292c3ae259792dda8b9de58.xlsx]

## Sheet: Sheet1
Supplementary 1 Table 3. Major elements compositions of clinopyroxene in Unit 3.
Unit 3	D15R1W95-01	D27R2W122-01	D27R2W122-02	D27R2W122-04	D35R4W34-01	D35R4W34-02	D35R4W34-03	D35R4W34-04	D35R4W34-05	D35R4W34-06	D35R4W34-07	D41R2W124-01	D41R2W124-02
Depth (mbsf)	336.15	454.21	454.21	454.21	534.04	534.04	534.04	534.04	534.04	534.04	534.04	589.95	589.95
SiO2	51.1527	52.6811	50.6547	47.4015	52.5854	52.7134	51.3196	51.1515	52.2077	51.3615	47.8456	50.688	50.752
TiO2	0.3216	0.1428	0.4126	0.6074	0.4417	0.3544	0.3788	0.295	0.5726	0.2854	0.7517	0.503	0.399
Al2O3	2.9195	2.2746	4.5836	6.0193	2.6498	1.6312	2.1374	4.0526	2.3301	4.748	8.6012	3.026	3.687
Cr2O3	0.0137	0.4889	0.4466	0.2014	0.0323	0.0061	0.005	0.1753	0.0017	0.1535	0.1694	0.127	0.072
FeO	9.6391	3.3147	5.5716	6.4013	10.8329	11.0852	11.2866	6.2845	9.9019	5.2519	7.6988	7.952	6.542
MnO	0.2489	0.035	0.1178	0.0855	0.2744	0.336	0.3152	0.1402	0.3462	0.0696	0.1236	0.184	0.144
MgO	16.0068	17.3418	15.5838	14.5202	15.8629	14.7113	14.5698	15.6947	15.2147	15.9752	13.4171	14.88	15.067
CaO	19.7007	24.1049	23.1363	23.3467	19.1066	20.0609	19.5421	22.759	20.6024	23.5298	22.7015	22.221	23.122
Na2O	0.2161	0.1316	0.2013	0.2057	0.2234	0.2119	0.237	0.1507	0.3128	0.1572	0.1565	0.256	0.213
Total	100.219	100.515	100.708	98.789	102.009	101.11	99.7915	100.704	101.49	101.532	101.465	99.837	99.998
Si4+	1.88566	1.9054	1.8438	1.76216	1.91374	1.94695	1.91935	1.86449	1.91021	1.84959	1.74213	1.87685	1.86765
Al3+(tet)	0.11434	0.0946	0.1562	0.23784	0.08626	0.05305	0.08065	0.13551	0.08979	0.15041	0.25787	0.12315	0.13235
Al3+(oct)	0.01252	0.00238	0.04045	0.02592	0.0274	0.01797	0.01357	0.03861	0.0107	0.05113	0.11128	0.00892	0.02758
Ti4+	0.00892	0.00388	0.01129	0.01698	0.01209	0.00984	0.01065	0.00809	0.01576	0.00773	0.02058	0.01401	0.01104
Cr3+	0.000399305	0.01398	0.01285	0.00592	0.000929412	0.000178137	0.000147853	0.00505	4.91796e-05	0.00437	0.00488	0.00372	0.00209
Fe3+	0.09903	0.0797	0.09451	0.18687	0.04952	0.03039	0.06281	0.08632	0.06971	0.09043	0.1116	0.10087	0.09578
Fe2+	0.19814	0.02057	0.0751	0.01215	0.2802	0.31203	0.29021	0.10526	0.23329	0.06774	0.12284	0.14538	0.10556
Mn2+	0.00777	0.00107	0.00363	0.00269	0.00846	0.01051	0.00999	0.00433	0.01073	0.00212	0.00381	0.00577	0.00449
Mg2+	0.87961	0.93501	0.84558	0.80467	0.86058	0.80998	0.81229	0.8528	0.82985	0.85758	0.72826	0.82133	0.82653
Ca2+	0.77817	0.93418	0.90236	0.92998	0.74507	0.79392	0.78313	0.88889	0.80772	0.90793	0.8857	0.88162	0.91172
Na1+	0.01545	0.00923	0.01421	0.01483	0.01576	0.01518	0.01719	0.01065	0.02219	0.01098	0.01105	0.01838	0.0152
Mg#	81.6153	97.8478	91.8431	98.5125	75.438	72.1902	73.6769	89.0132	78.0567	92.6793	85.5667	84.9614	88.6749
Wo (%)	41.9289	49.434	49.4976	53.2392	39.5085	41.438	41.5314	48.1277	43.1737	49.5256	50.996	47.6984	49.4477
En (%)	47.3949	49.4777	46.383	46.0652	45.6336	42.276	43.0778	46.1732	44.3567	46.7793	41.9311	44.4363	44.8274
Fs (%)	10.6762	1.08828	4.1194	0.69559	14.8579	16.286	15.3908	5.69913	12.4696	3.69508	7.07288	7.8653	5.7249
Supplementary1 Table 3. Continued
Unit 3	D44R1W14-01	D44R1W14-02	D44R1W14-03	D45R4W41-01	D45R4W41-02	D45R4W41-03	D45R4W41-04	D45R4W41-05	D45R4W41-06	D49R7W44-01	D49R7W44-02	D49R7W44-03	D49R7W44-04
Depth (mbsf)	616.64	616.64	616.64	631.06	631.06	631.06	631.06	631.06	631.06	673.97	673.97	673.97	673.97
SiO2	49.8716	48.7334	51.6313	50.905	50.7	51.618	50.955	50.885	50.484	48.986	49.833	50.762	51.614
TiO2	0.5566	0.7042	0.4593	0.454	0.509	0.344	0.318	0.306	0.392	0.822	0.641	0.419	0.298
Al2O3	4.4775	5.5056	2.5731	2.387	2.698	2.289	3.481	3.498	3.894	4.048	3.509	3.371	2.794
Cr2O3	0.1955	0.015	0.0246	0.09	0.081	0.043	0.138	0.082	0.261	0.019	0.009	0.694	0.509
FeO	7.5958	9.9045	8.0966	10.133	9.661	9.548	7.387	6.365	5.348	10.132	9.463	5.52	5.48
MnO	0.1678	0.2847	0.2828	0.273	0.251	0.247	0.171	0.129	0.092	0.221	0.27	0.118	0.115
MgO	14.9003	13.9051	15.9361	14.875	14.899	16.092	14.948	15.222	15.11	13.696	14.124	15.695	15.796
CaO	22.1074	21.251	21.4388	20.079	20.496	19.348	22.688	23.022	23.751	21.82	21.573	22.965	23.032
Na2O	0.2827	0.3482	0.2738	0.288	0.258	0.219	0.21	0.181	0.138	0.276	0.285	0.252	0.283
Total	100.155	100.652	100.716	99.484	99.553	99.748	100.296	99.69	99.47	100.02	99.707	99.796	99.921
Si4+	1.83579	1.79724	1.88955	1.90149	1.89019	1.91271	1.87456	1.87688	1.86345	1.82471	1.85729	1.86611	1.89428
Al3+(tet)	0.16421	0.20276	0.11045	0.09851	0.10981	0.08729	0.12544	0.12312	0.13655	0.17529	0.14271	0.13389	0.10572
Al3+(oct)	0.03006	0.03656	0.000545491	0.00659	0.00875	0.01268	0.0255	0.02896	0.03287	0.00245	0.01145	0.01218	0.01515
Ti4+	0.01541	0.01953	0.01264	0.01275	0.01427	0.00959	0.0088	0.00849	0.01088	0.02303	0.01797	0.01158	0.00823
Cr3+	0.00569	0.00043738	0.000711818	0.00266	0.00239	0.00126	0.00401	0.00239	0.00762	0.000559584	0.000265213	0.02017	0.01477
Fe3+	0.11782	0.1516	0.10334	0.08461	0.08879	0.06992	0.09331	0.08774	0.08418	0.14616	0.11566	0.09632	0.07949
Fe2+	0.11602	0.15388	0.14447	0.23195	0.21244	0.22598	0.13397	0.1086	0.08091	0.16948	0.17931	0.07339	0.08872
Mn2+	0.00523	0.00889	0.00877	0.00864	0.00793	0.00775	0.00533	0.00403	0.00288	0.00697	0.00852	0.00367	0.00358
Mg2+	0.81762	0.76444	0.86939	0.82829	0.82802	0.88889	0.81976	0.83696	0.83141	0.76051	0.78471	0.8601	0.8642
Ca2+	0.87197	0.83975	0.8407	0.80366	0.81877	0.76821	0.89434	0.90988	0.93938	0.87091	0.86153	0.90461	0.90574
Na1+	0.02018	0.0249	0.01943	0.02086	0.01865	0.01574	0.01498	0.01295	0.00988	0.01993	0.0206	0.01796	0.02014
Mg#	87.5738	83.2429	85.7502	78.1229	79.5821	79.7304	85.9531	88.5147	91.1314	81.7762	81.3998	92.1381	90.6897
Wo (%)	48.2923	47.7655	45.3312	43.1172	44.0379	40.7954	48.3932	49.0383	50.7305	48.3596	47.1928	49.2143	48.7309
En (%)	45.2824	43.4815	46.8786	44.4386	44.5359	47.2041	44.3575	45.1086	44.9001	42.2296	42.9851	46.7931	46.496
Fs (%)	6.4253	8.75297	7.79016	12.4442	11.4262	12.0005	7.2493	5.85314	4.36945	9.41086	9.82205	3.9926	4.77313
Supplementary1 Table 3. Continued
Unit 3	D49R7W44-05	D57R4W56-01	D57R4W56-02	D57R5W112-01	D57R5W112-02	D57R5W112-03	D57R5W112-04	D57R5W112-05	D57R5W112-06	D57R5W112-07	D57R5W112-08	D57R5W112-09	D57R5W112-10
Depth (mbsf)	673.97	747.05	747.05	749.12	749.12	749.12	749.12	749.12	749.12	749.12	749.12	749.12	749.12
SiO2	50.543	50.704	50.876	51.4813	52.1057	51.1856	51.6386	51.2648	50.3389	51.6032	52.2782	52.302	51.7399
TiO2	0.548	0.475	0.557	0.6832	0.6394	0.5962	0.5226	0.6617	0.666	0.5819	0.5093	0.4582	0.4499
Al2O3	3.627	3.118	3.24	3.0999	3.2253	4.5816	2.6275	3.4843	4.0706	3.9856	3.2197	2.9494	2.4951
Cr2O3	0.17	0.327	0.344	0.1313	0.4464	0.6185	0.0164	0.04	0.0616	0.7656	0.589	0.2692	0.0181
FeO	7.285	7.019	8.249	10.3157	9.0871	6.3959	9.8421	9.0406	9.4716	6.8726	7.4415	7.398	9.3769
MnO	0.183	0.16	0.234	0.3202	0.2884	0.1679	0.3632	0.2681	0.2422	0.1899	0.2174	0.183	0.3473
MgO	15.044	15.229	15.497	16.0047	17.7254	15.1997	16.0153	15.4586	14.9469	16.2664	16.3288	16.4739	15.7348
CaO	21.56	22.448	20.405	18.6014	17.5209	22.0269	19.1763	20.6122	19.5486	20.4063	20.2884	20.5643	19.2244
Na2O	0.29	0.209	0.343	0.2608	0.1733	0.3194	0.2839	0.3476	0.307	0.2667	0.2595	0.236	0.272
Total	99.25	99.689	99.745	100.898	101.212	101.092	100.486	101.178	99.6534	100.938	101.132	100.834	99.6584
Si4+	1.87714	1.87513	1.88232	1.89015	1.89272	1.86309	1.90106	1.8728	1.87071	1.87847	1.90253	1.90661	1.9207
Al3+(tet)	0.12286	0.12487	0.11768	0.10985	0.10728	0.13691	0.09894	0.1272	0.12929	0.12153	0.09747	0.09339	0.0793
Al3+(oct)	0.03591	0.01105	0.02362	0.0243	0.03081	0.05965	0.01507	0.02284	0.04901	0.04948	0.04064	0.03334	0.02988
Ti4+	0.01531	0.01321	0.0155	0.01886	0.01747	0.01632	0.01447	0.01818	0.01861	0.01593	0.01394	0.01256	0.01256
Cr3+	0.00499	0.00956	0.01006	0.00381	0.01282	0.0178	0.000477368	0.00116	0.00181	0.02204	0.01695	0.00776	0.000531253
Fe3+	0.07223	0.09282	0.07761	0.06258	0.04092	0.04936	0.07472	0.09147	0.06336	0.03698	0.03032	0.04386	0.04335
Fe2+	0.15405	0.12427	0.17763	0.25417	0.23514	0.14534	0.22831	0.18475	0.23101	0.17225	0.19617	0.18169	0.24777
Mn2+	0.00576	0.00501	0.00733	0.00996	0.00887	0.00518	0.01133	0.0083	0.00762	0.00586	0.0067	0.00565	0.01092
Mg2+	0.83289	0.83956	0.85471	0.87596	0.95981	0.82473	0.87891	0.84185	0.82802	0.88269	0.88584	0.89522	0.87073
Ca2+	0.85798	0.88953	0.80893	0.73179	0.68195	0.85908	0.75645	0.80685	0.77842	0.79595	0.79114	0.80325	0.76468
Na1+	0.02088	0.01499	0.02461	0.01857	0.01221	0.02254	0.02027	0.02462	0.02212	0.01882	0.01831	0.01668	0.01958
Mg#	84.3911	87.1067	82.7935	77.5094	80.3223	85.0174	79.3801	82.0037	78.1865	83.6717	81.8701	83.1288	77.8482
Wo (%)	46.5051	47.9957	43.9333	39.3029	36.3338	46.9661	40.5892	44.0073	42.3639	43.0035	42.2359	42.7226	40.6058
En (%)	45.1451	45.2993	46.4194	47.0459	51.1382	45.088	47.1603	45.9161	45.0637	47.6899	47.2915	47.614	46.2373
Fs (%)	8.34979	6.705	9.64732	13.6512	12.5281	7.94585	12.2505	10.0766	12.5725	9.30654	10.4726	9.66339	13.1569
Supplementary1 Table 3. Continued
Unit 3	D58R3W120-01	D58R3W120-02	D66R2W5-01	D66R2W5-02	D66R2W5-03	D66R2W5-04	D66R2W5-05	D66R2W5-06	D66R2W5-07	D66R2W5-08	D66R2W5-09	D66R2W5-10	D66R2W5-11
Depth (mbsf)	756.56	756.56	831.4	831.4	831.4	831.4	831.4	831.4	831.4	831.4	831.4	831.4	831.4
SiO2	50.835	52.048	50.766	51.503	50.653	51.232	50.267	50.452	50.537	50.284	51.2039	52.3867	50.8809
TiO2	0.427	0.48	0.582	0.45	0.557	0.55	0.465	0.448	0.374	0.46	0.6915	0.51	0.6045
Al2O3	2.508	2.419	2.979	2.788	2.906	2.676	4.17	3.981	4.137	4.569	3.7888	2.3158	4.2398
Cr2O3	0	0.231	0.155	0.067	0.106	0.49	0.331	0.478	0.876	0.64	0.5655	0.0064	0.0594
FeO	10.058	6.54	9.188	6.17	8.779	7.702	5.477	5.94	4.54	5.34	7.9225	9.461	7.402
MnO	0.35	0.178	0.286	0.164	0.226	0.198	0.113	0.157	0.092	0.162	0.2168	0.3611	0.1896
MgO	14.815	16.298	15.748	16.009	15.308	15.7	15.335	15.353	15.849	15.714	15.481	16.1889	15.0139
CaO	20.391	21.698	19.782	22.517	20.441	20.773	23.383	22.361	22.72	22.241	20.0402	18.8306	21.7592
Na2O	0.277	0.24	0.358	0.254	0.353	0.311	0.201	0.228	0.223	0.298	0.3126	0.2844	0.2626
Total	99.661	100.132	99.844	99.922	99.329	99.632	99.742	99.398	99.348	99.708	100.223	100.345	100.412
Si4+	1.89521	1.90873	1.87796	1.89065	1.88439	1.8964	1.84849	1.8643	1.86029	1.84599	1.88591	1.9298	1.86828
Al3+(tet)	0.10479	0.09127	0.12204	0.10935	0.11561	0.1036	0.15151	0.1357	0.13971	0.15401	0.11409	0.0702	0.13172
Al3+(oct)	0.00542	0.01329	0.00785	0.01128	0.01182	0.01315	0.02923	0.03769	0.03978	0.04369	0.05039	0.03036	0.05178
Ti4+	0.01197	0.01324	0.01619	0.01242	0.01558	0.01531	0.01286	0.01245	0.01035	0.0127	0.01915	0.01413	0.01669
Cr3+	0	0.0067	0.00453	0.00194	0.00312	0.01434	0.00962	0.01397	0.0255	0.01858	0.01647	0.000186406	0.00172
Fe3+	0.09544	0.06187	0.10295	0.08936	0.09497	0.06781	0.10127	0.07548	0.06965	0.08756	0.03125	0.03171	0.06353
Fe2+	0.21816	0.13872	0.1813	0.10006	0.17817	0.17063	0.06717	0.10809	0.07012	0.07639	0.21279	0.25977	0.16378
Mn2+	0.01105	0.00553	0.00896	0.0051	0.00712	0.00621	0.00352	0.00491	0.00287	0.00504	0.00676	0.01127	0.0059
Mg2+	0.82335	0.89097	0.86842	0.87605	0.84893	0.86632	0.84063	0.84571	0.86968	0.85995	0.84997	0.88899	0.82181
Ca2+	0.81457	0.85262	0.78411	0.88569	0.81482	0.82391	0.92136	0.88537	0.89613	0.87488	0.79089	0.74328	0.8561
Na1+	0.02002	0.01707	0.02568	0.01808	0.02546	0.02232	0.01433	0.01634	0.01592	0.02121	0.02232	0.02031	0.0187
Mg#	79.0535	86.528	82.7287	89.7491	82.6531	83.545	92.6008	88.6674	92.5388	91.8416	79.9778	77.3873	83.3829
Wo (%)	43.8864	45.2964	42.7581	47.5715	44.2375	44.276	50.3704	48.1396	48.8107	48.3031	42.6664	39.2845	46.4846
En (%)	44.3597	47.334	47.3553	47.0539	46.0894	46.5548	45.9573	45.9833	47.37	47.4791	45.8541	46.9861	44.6226
Fs (%)	11.7539	7.36953	9.88661	5.37457	9.6731	9.16922	3.67232	5.87713	3.81929	4.21776	11.4795	13.7294	8.89272
Supplementary1 Table 3. Continued
Unit 3	D66R2W5-12	D66R2W5-13	D66R2W5-14	D66R2W5-15	D66R2W5-16	D66R2W5-17	D66R2W5-18	D66R2W5-19	D66R2W5-20	D72R5W72-01	D72R5W72-02	D72R5W72-03	D72R5W72-04
Depth (mbsf)	831.4	831.4	831.4	831.4	831.4	831.4	831.4	831.4	831.4	894.3	894.3	894.3	894.3
SiO2	52.2417	50.2789	51.9319	51.3309	52.8739	51.6317	51.7939	50.8509	51.3381	51.0253	50.8409	51.5873	50.3742
TiO2	0.5884	0.6492	0.4823	0.5572	0.3097	0.3575	0.3836	0.5978	0.4547	0.5921	0.5207	0.4305	0.6497
Al2O3	2.9663	4.6828	3.8932	4.2682	3.0263	3.447	2.9535	4.694	4.7691	3.3109	4.1421	2.6844	4.3784
Cr2O3	0.1861	0.0639	0.777	0.4254	0.5455	0.8936	0.659	0.7956	1.0845	0.2779	1.1026	0.0426	0.6859
FeO	8.5099	7.4022	6.0934	6.8939	5.0285	4.7761	6.4343	5.7108	4.701	8.584	5.1792	8.9899	6.5117
MnO	0.2683	0.1727	0.1568	0.1794	0.1503	0.1357	0.2037	0.1331	0.1067	0.2398	0.1082	0.2853	0.1458
MgO	16.3409	14.6591	16.5025	15.2132	17.4145	17.1288	16.6046	15.4329	15.9729	15.9694	15.5386	16.1208	15.4076
CaO	20.023	22.3221	20.3013	21.7992	20.9534	20.834	20.6792	22.1212	22.6336	19.8381	23.1888	20.4119	22.3244
Na2O	0.291	0.2312	0.28	0.2794	0.1849	0.1886	0.2939	0.2355	0.1718	0.4039	0.2274	0.2915	0.2468
Total	101.416	100.462	100.418	100.947	100.487	99.393	100.006	100.572	101.232	100.241	100.849	100.844	100.725
Si4+	1.89883	1.84691	1.89493	1.87317	1.91906	1.89469	1.89863	1.85729	1.8571	1.87558	1.8511	1.88728	1.84011
Al3+(tet)	0.10117	0.15309	0.10507	0.12683	0.08094	0.10531	0.10137	0.14271	0.1429	0.12442	0.1489	0.11272	0.15989
Al3+(oct)	0.02591	0.04966	0.06237	0.05676	0.04853	0.04379	0.02624	0.05937	0.06045	0.01903	0.02886	0.00303	0.02863
Ti4+	0.01608	0.01793	0.01324	0.01529	0.00845	0.00987	0.01058	0.01642	0.01237	0.01637	0.01426	0.01184	0.01785
Cr3+	0.00535	0.00186	0.02242	0.01227	0.01565	0.02593	0.0191	0.02298	0.03102	0.00808	0.03174	0.00123	0.01981
Fe3+	0.05825	0.08217	0.01362	0.04698	0.01286	0.02927	0.05577	0.04421	0.03874	0.09337	0.07583	0.10544	0.09324
Fe2+	0.20043	0.14523	0.17233	0.16342	0.13977	0.1173	0.14149	0.13023	0.10348	0.17052	0.08188	0.16961	0.10569
Mn2+	0.00826	0.00537	0.00485	0.00555	0.00462	0.00422	0.00633	0.00412	0.00327	0.00747	0.00334	0.00884	0.00451
Mg2+	0.88539	0.80271	0.89763	0.82758	0.94221	0.937	0.90736	0.84027	0.86133	0.87504	0.84337	0.87916	0.839
Ca2+	0.77982	0.8786	0.79374	0.85238	0.81488	0.8192	0.81225	0.86573	0.87729	0.78135	0.90467	0.80015	0.87379
Na1+	0.02051	0.01647	0.01981	0.01977	0.01301	0.01342	0.02089	0.01668	0.01205	0.02879	0.01605	0.02068	0.01748
Mg#	81.5411	84.679	83.8939	83.5095	87.0817	88.8737	86.51	86.5807	89.2744	83.6911	91.151	83.8274	88.8118
Wo (%)	41.7989	48.1018	42.5894	46.2401	42.9595	43.7255	43.6435	47.1472	47.6245	42.7689	49.4378	43.2764	48.0507
En (%)	47.4578	43.9469	48.164	44.8946	49.6719	50.0132	48.754	45.7604	46.758	47.8974	46.088	47.5499	46.1371
Fs (%)	10.7433	7.95132	9.24659	8.86527	7.36865	6.26125	7.60251	7.09249	5.61759	9.33375	4.47427	9.17366	5.81221
Supplementary1 Table 3. Continued
Unit 3	D72R5W72-05	D72R5W72-06	D72R5W72-07	D72R5W72-08	D72R5W72-09	D72R5W72-10	D72R5W72-11	E8R5W16-01	E8R5W16-02	E8R5W16-03	E8R5W16-04	E8R5W16-05	E8R5W16-06
Depth (mbsf)	894.3	894.3	894.3	894.3	894.3	894.3	894.3	911.8	911.8	911.8	911.8	911.8	911.8
SiO2	50.4353	50.4709	50.0326	49.4746	51.8662	50.109	48.8309	51.8527	52.7542	51.7152	50.8626	51.1398	52.9698
TiO2	0.5467	0.5013	0.5393	0.8504	0.4398	0.5056	1.0171	0.231	0.1419	0.3817	0.3184	0.4276	0.1504
Al2O3	4.1213	4.9247	4.5039	5.4048	3.2094	4.6056	6.7505	2.4198	2.128	2.1427	3.3527	2.603	1.9211
Cr2O3	0.1508	0.6264	0.5465	0.3392	0.4735	0.8796	0.1187	0.401	0.4057	0.0498	0.1236	0.0461	0.2809
FeO	6.7472	5.2324	5.4261	6.8071	6.7687	5.1424	6.2031	5.7883	4.7789	11.7775	8.6073	10.9627	4.4271
MnO	0.1613	0.0921	0.1119	0.1289	0.1673	0.1145	0.099	0.1583	0.1439	0.3024	0.2455	0.2805	0.1074
MgO	14.9963	15.1721	15.8413	14.4744	15.9533	15.6978	14.1627	17.0391	17.6051	15.7653	17.0254	15.1098	17.5466
CaO	23.4938	23.6578	22.7365	23.5938	22.1658	23.7174	23.5721	21.6456	22.2534	18.427	18.7305	19.355	22.9274
Na2O	0.2256	0.2389	0.2372	0.3082	0.3056	0.21	0.2443	0.2298	0.1281	0.2199	0.272	0.3193	0.1559
Total	100.878	100.917	99.9753	101.381	101.35	100.982	100.998	99.7656	100.339	100.781	99.538	100.244	100.487
Si4+	1.84122	1.83478	1.83188	1.7989	1.88123	1.81831	1.77952	1.8992	1.9158	1.90927	1.87451	1.89663	1.91939
Al3+(tet)	0.15878	0.16522	0.16812	0.2011	0.11877	0.18169	0.22048	0.1008	0.0842	0.09073	0.12549	0.10337	0.08061
Al3+(oct)	0.01857	0.0458	0.02625	0.03054	0.01844	0.0153	0.06949	0.00366	0.00689	0.00251	0.02016	0.01042	0.00144
Ti4+	0.01501	0.01371	0.01485	0.02325	0.012	0.0138	0.02788	0.00636	0.00388	0.0106	0.00883	0.01193	0.0041
Cr3+	0.00435	0.018	0.01582	0.00975	0.01358	0.02524	0.00342	0.01161	0.01165	0.00145	0.0036	0.00135	0.00805
Fe3+	0.12181	0.09085	0.11318	0.13602	0.08426	0.12834	0.10908	0.08912	0.06693	0.08131	0.10352	0.09071	0.07387
Fe2+	0.08419	0.06823	0.05297	0.07097	0.12107	0.02772	0.07998	0.08818	0.07821	0.28233	0.16178	0.24931	0.06029
Mn2+	0.00499	0.00284	0.00347	0.00397	0.00514	0.00352	0.00306	0.00491	0.00443	0.00946	0.00766	0.00881	0.0033
Mg2+	0.8161	0.8222	0.86462	0.78454	0.86257	0.84914	0.76939	0.93032	0.95306	0.86764	0.93536	0.83535	0.9478
Ca2+	0.91901	0.92153	0.89199	0.91922	0.86146	0.92217	0.92045	0.8495	0.86593	0.72895	0.73966	0.76915	0.89019
Na1+	0.01597	0.01684	0.01684	0.02173	0.02149	0.01478	0.01726	0.01632	0.00902	0.01574	0.01944	0.02296	0.01095
Mg#	90.6482	92.337	94.2274	91.7041	87.6921	96.8388	90.5837	91.3418	92.4157	75.4487	85.2542	77.0147	94.0193
Wo (%)	50.5142	50.8582	49.2929	51.7947	46.689	51.2594	52.0083	45.4761	45.6424	38.7961	40.2691	41.49	46.8946
En (%)	44.858	45.3761	47.78	44.2062	46.7495	47.1998	43.4726	49.803	50.2349	46.1775	50.9231	45.0613	49.9293
Fs (%)	4.62783	3.76575	2.92711	3.99908	6.56145	1.5408	4.51903	4.7208	4.12262	15.0264	8.8078	13.4487	3.17608
Supplementary1 Table 3. Continued
Unit 3	E8R5W16-07	E8R5W16-08	E8R5W16-09	E8R5W16-10	E8R5W16-11	E16R3W141-01	E16R3W141-02	E16R3W141-03	E16R3W141-04	E16R3W141-05	E16R3W141-06	E16R3W141-08	E16R3W141-09
Depth (mbsf)	911.8	911.8	911.8	911.8	911.8	987.93	987.93	987.93	987.93	987.93	987.93	987.93	987.93
SiO2	51.7777	51.448	50.6878	51.8196	51.7952	51.7006	52.1302	53.3357	52.5495	52.329	52.6731	52.4526	52.9794
TiO2	0.2821	0.3568	0.3678	0.2914	0.4179	0.3002	0.1905	0.2615	0.3575	0.2651	0.3621	0.2822	0.3533
Al2O3	2.5897	3.0603	2.9454	2.3825	2.03	1.9017	2.3292	1.5842	1.6108	1.1629	1.7636	1.6447	2.3908
Cr2O3	0.1386	0.22	0.2135	0.0572	0	0.0153	0.4339	0.0153	0.0005	0	0.0176	0.0123	0.0729
FeO	8.2462	8.673	7.7309	9.6962	10.7907	8.7872	7.1246	9.4399	9.8489	12.7919	9.9132	9.5738	8.9097
MnO	0.2619	0.2602	0.1678	0.2924	0.3217	0.2735	0.1901	0.3446	0.3034	0.646	0.299	0.3124	0.2554
MgO	17.6758	16.7198	15.6916	16.6363	14.6586	14.9536	15.5726	14.3469	14.6019	13.0827	14.3812	14.4071	15.2036
CaO	18.9022	19.2996	21.3927	18.5929	20.2804	20.3814	21.1906	21.464	20.4021	20.1962	20.8398	21.3925	20.8794
Na2O	0.1786	0.1953	0.2023	0.2388	0.2887	0.2326	0.23	0.2701	0.2502	0.24	0.2956	0.2652	0.2473
Total	100.053	100.233	99.3998	100.007	100.583	98.5461	99.3917	101.062	99.9248	100.714	100.545	100.343	101.292
Si4+	1.89628	1.8888	1.87874	1.91156	1.91939	1.9447	1.93348	1.96615	1.95853	1.96076	1.95224	1.94634	1.93878
Al3+(tet)	0.10372	0.1112	0.12126	0.08844	0.08061	0.0553	0.06652	0.03385	0.04147	0.03924	0.04776	0.05366	0.06122
Al3+(oct)	0.00807	0.02123	0.00742	0.01515	0.00806	0.02901	0.03531	0.03499	0.02929	0.01212	0.02929	0.01827	0.04191
Ti4+	0.00777	0.00985	0.01025	0.00808	0.01165	0.00849	0.00531	0.00725	0.01002	0.00747	0.01009	0.00788	0.00972
Cr3+	0.00401	0.00639	0.00626	0.00167	0	0.000455026	0.01272	0.000445942	1.4734e-05	0	0.000515759	0.000360865	0.00211
Fe3+	0.08878	0.07778	0.10162	0.07253	0.07001	0.02582	0.0244	0.00322	0.0102	0.02962	0.01901	0.03836	0.0153
Fe2+	0.16379	0.18851	0.13803	0.2266	0.26442	0.25061	0.1966	0.28781	0.29679	0.37124	0.28827	0.25874	0.25739
Mn2+	0.00812	0.00809	0.00527	0.00914	0.0101	0.00871	0.00597	0.01076	0.00958	0.0205	0.00939	0.00982	0.00792
Mg2+	0.965	0.91504	0.867	0.91483	0.80976	0.83848	0.861	0.7884	0.81126	0.73075	0.79457	0.79692	0.82939
Ca2+	0.74176	0.75921	0.84962	0.73491	0.80527	0.82146	0.84215	0.84782	0.81476	0.81086	0.82762	0.85056	0.81872
Na1+	0.01268	0.0139	0.01454	0.01708	0.02074	0.01696	0.01654	0.01931	0.01808	0.01744	0.02124	0.01908	0.01755
Mg#	85.4896	82.9176	86.2663	80.1473	75.3843	76.9889	81.4108	73.2572	73.2153	66.3117	73.378	75.4901	76.3165
Wo (%)	39.6547	40.7572	45.8102	39.1672	42.8463	42.9959	44.3296	44.0649	42.3735	42.3901	43.3206	44.6202	42.9662
En (%)	51.5889	49.1227	46.7475	48.7559	43.0849	43.8868	45.3218	40.9765	42.1914	38.2021	41.5902	41.8063	43.5262
Fs (%)	8.75634	10.1201	7.44227	12.0769	14.0688	13.1173	10.3487	14.9586	15.4351	19.4078	15.0892	13.5735	13.5076
Supplementary1 Table 3. Continued
Unit 3	E20R6W36-01	E20R6W36-02	E21R3W30-01	E21R3W30-02	E21R3W30-03	E21R3W30-04	E21R3W30-05	E21R3W30-06	E21R3W30-07	E21R3W30-08	E21R3W30-09	E21R3W30-10	E21R3W30-11
Depth (mbsf)	1029.99	1029.99	1035.16	1035.16	1035.16	1035.16	1035.16	1035.16	1035.16	1035.16	1035.16	1035.16	1035.16
SiO2	52.43	52.493	53.045	53.235	53.247	52.001	53.394	53.427	53.423	53.32	52.362	52.171	53.02
TiO2	0.22	0.153	0.178	0.155	0.161	0.269	0.164	0.131	0.16	0.146	0.317	0.317	0.17
Al2O3	1.95	1.887	1.977	1.885	1.744	2.298	1.699	1.843	1.555	1.787	1.872	2.252	2.032
Cr2O3	0.31	0.259	0.331	0.47	0.353	0.223	0.092	0.674	0.206	0.204	0.058	0.143	0.305
FeO	6.453	5.817	4.555	4.104	5.94	6.7	5.438	3.925	5.358	5.361	9.263	6.755	5.683
MnO	0.19	0.183	0.136	0.108	0.188	0.177	0.143	0.106	0.166	0.137	0.24	0.183	0.176
MgO	17.002	17.311	17.063	17.025	17.646	16.411	17.115	16.961	17.081	16.94	15.783	15.83	17.273
CaO	20.904	20.911	22.8	23.198	20.666	21.131	21.879	23.118	21.784	22.066	19.624	21.8	21.229
Na2O	0.214	0.185	0.168	0.117	0.172	0.186	0.22	0.169	0.139	0.173	0.245	0.195	0.154
Total	99.673	99.199	100.253	100.297	100.117	99.396	100.144	100.354	99.872	100.134	99.764	99.646	100.042
Si4+	1.92659	1.93296	1.93089	1.93702	1.94311	1.92049	1.94789	1.94305	1.95627	1.94725	1.94234	1.92662	1.93715
Al3+(tet)	0.07341	0.06704	0.06911	0.06298	0.05689	0.07951	0.05211	0.05695	0.04373	0.05275	0.05766	0.07338	0.06285
Al3+(oct)	0.01105	0.01486	0.01571	0.01787	0.01813	0.02052	0.02094	0.02206	0.02339	0.02418	0.02419	0.02465	0.02466
Ti4+	0.00608	0.00424	0.00487	0.00424	0.00442	0.00747	0.0045	0.00358	0.00441	0.00401	0.00884	0.0088	0.00467
Cr3+	0.00901	0.00754	0.00953	0.01352	0.01019	0.00651	0.00265	0.01938	0.00596	0.00589	0.0017	0.00418	0.00881
Fe3+	0.05643	0.04938	0.04599	0.03136	0.03191	0.05086	0.03508	0.02026	0.01544	0.02691	0.03171	0.04091	0.03095
Fe2+	0.14188	0.12976	0.09268	0.09353	0.14937	0.15608	0.13083	0.09913	0.14865	0.13683	0.25566	0.16772	0.1427
Mn2+	0.00591	0.00571	0.00419	0.00333	0.00581	0.00554	0.00442	0.00327	0.00515	0.00424	0.00754	0.00572	0.00545
Mg2+	0.93132	0.95024	0.92589	0.92345	0.95993	0.90349	0.93076	0.91953	0.9324	0.92222	0.87275	0.87144	0.94076
Ca2+	0.82306	0.82507	0.88929	0.90445	0.80808	0.83621	0.85525	0.90088	0.85474	0.86348	0.77999	0.86262	0.83109
Na1+	0.01525	0.01321	0.01186	0.00825	0.01217	0.01332	0.01556	0.01192	0.00987	0.01225	0.01762	0.01396	0.01091
Mg#	86.7797	87.9852	90.901	90.8032	86.5348	85.2695	87.676	90.2686	86.2495	87.0799	77.3433	83.86	86.8292
Wo (%)	43.4045	43.3091	46.6119	47.0716	42.145	44.1088	44.6176	46.9323	44.1544	44.9136	40.8716	45.3585	43.409
En (%)	49.1135	49.8795	48.5303	48.0607	50.0646	47.658	48.5569	47.9036	48.1665	47.9693	45.7319	45.8225	49.1375
Fs (%)	7.48197	6.8114	4.85781	4.86773	7.79047	8.23318	6.82546	5.16401	7.67902	7.11705	13.3965	8.81902	7.45353
Supplementary1 Table 3. Continued
Unit 3	E21R3W30-12	E21R3W30-13	E21R3W30-14	E21R3W30-15	E21R3W30-16	E21R3W30-17	E26R2W104-01	E26R2W104-02	E26R2W104-03	E27R2-CPX-5	E27R5W5-01	E27R5W5-02	E27R5W5-03
Depth (mbsf)	1035.16	1035.16	1035.16	1035.16	1035.16	1035.16	1082.94	1082.94	1082.94	1092.63	1095.94	1095.94	1095.94
SiO2	53.175	53.069	52.662	53.262	53.684	52.758	51.749	51.009	51.083	51.719	52.103	52.016	51.452
TiO2	0.172	0.147	0.3	0.168	0.142	0.17	0.524	0.416	0.414	0.216	0.23	0.38	0.381
Al2O3	1.668	2.108	2.139	1.746	1.698	2.175	2.764	3.635	3.496	2.307	0.917	1.877	2.072
Cr2O3	0.219	0.356	0.273	0.259	0.155	0.329	0.156	0.563	0.073	0.064	0	0.085	0.126
FeO	6.036	5.566	7.613	5.759	4.961	5.583	6.179	6.482	5.984	6.792	10.808	9.497	9.827
MnO	0.178	0.204	0.217	0.17	0.145	0.17	0.149	0.19	0.158	0.215	0.649	0.25	0.238
MgO	17.107	17.272	16.48	17.354	17.123	17.177	15.071	15.845	14.686	16.751	13.345	16.307	14.932
CaO	20.987	21.213	20.243	20.855	22.19	20.867	22.918	21.223	23.588	21.3	21.065	18.913	20.124
Na2O	0.147	0.175	0.203	0.127	0.14	0.153	0.251	0.3	0.227	0.148	0.267	0.243	0.222
Total	99.689	100.11	100.13	99.7	100.238	99.382	99.761	99.663	99.709	99.512	99.384	99.568	99.374
Si4+	1.95287	1.937	1.93564	1.95325	1.95641	1.93991	1.91083	1.8792	1.8864	1.90503	1.96749	1.93043	1.92428
Al3+(tet)	0.04713	0.063	0.06436	0.04675	0.04359	0.06009	0.08917	0.1208	0.1136	0.09497	0.03251	0.06957	0.07572
Al3+(oct)	0.02508	0.02769	0.02831	0.02872	0.02935	0.03418	0.03113	0.03705	0.03857	0.00519	0.0083	0.01254	0.01562
Ti4+	0.00475	0.00404	0.00829	0.00463	0.00389	0.0047	0.01455	0.01153	0.0115	0.00598	0.00653	0.01061	0.01072
Cr3+	0.00636	0.01027	0.00793	0.00751	0.00447	0.00956	0.00455	0.0164	0.00213	0.00186	0	0.00249	0.00373
Fe3+	0.01666	0.02935	0.02601	0.01028	0.01188	0.01785	0.04236	0.06573	0.06615	0.08651	0.03069	0.05081	0.05104
Fe2+	0.16873	0.14056	0.20802	0.16635	0.13933	0.15384	0.14845	0.13398	0.11866	0.12272	0.31063	0.24396	0.25634
Mn2+	0.00554	0.00631	0.00676	0.00528	0.00448	0.00529	0.00466	0.00593	0.00494	0.00671	0.02076	0.00786	0.00754
Mg2+	0.93655	0.93977	0.90297	0.9487	0.93022	0.94152	0.82957	0.87018	0.80845	0.91978	0.7512	0.90215	0.83248
Ca2+	0.82587	0.82963	0.79725	0.81949	0.8665	0.82214	0.90676	0.83778	0.93335	0.84067	0.85233	0.75209	0.80645
Na1+	0.01047	0.01239	0.01447	0.00903	0.00989	0.01091	0.01797	0.02143	0.01625	0.01057	0.01955	0.01749	0.0161
Mg#	84.7342	86.9892	81.2762	85.0814	86.973	85.9553	84.8214	86.6575	87.2011	88.2283	70.7458	78.7141	76.4571
Wo (%)	42.7656	43.4372	41.7795	42.3611	44.7561	42.8758	48.1095	45.4834	50.1678	44.6413	44.5273	39.6213	42.5506
En (%)	48.4969	49.2036	47.3195	49.0401	48.0474	49.1015	44.014	47.2425	43.4543	48.842	39.2445	47.5267	43.9243
Fs (%)	8.73749	7.35923	10.901	8.59884	7.1965	8.02269	7.8765	7.27409	6.37784	6.51664	16.2282	12.852	13.5251
Supplementary1 Table 3. Continued
Unit 3	E27R5W5-04	E27R5W5-05	E27R5W5-06	E27R5W5-07	E27R5W5-08	E27R5W5-09	E27R5W5-10	E28R6W127-01	E28R6W127-02	E28R6W127-03	E28R6W127-04	E28R6W127-05	E28R6W127-06
Depth (mbsf)	1095.94	1095.94	1095.94	1095.94	1095.94	1095.94	1095.94	1108.01	1108.01	1108.01	1108.01	1108.01	1108.01
SiO2	53.338	52.716	53.111	53.03	52.463	53.121	51.983	52.0497	52.5907	52.6287	52.6838	54.2947	53.3698
TiO2	0.104	0.153	0.161	0.197	0.274	0.096	0.209	0.484	0.3046	0.2514	0.2524	0.129	0.3212
Al2O3	1.569	2.114	1.632	1.704	2.028	1.811	2.436	2.0608	2.2965	3.7313	1.7352	1.3713	2.1681
Cr2O3	0.384	0.344	0.107	0.193	0.119	0.454	0.468	0.0098	0.2719	0.1414	0.1961	0.5395	0.342
FeO	4.716	5.394	6.968	6.181	6.896	5.115	5.458	11.7386	8.462	5.7305	8.4569	4.1229	7.6697
MnO	0.166	0.179	0.258	0.148	0.222	0.141	0.133	0.3124	0.2581	0.1356	0.2242	0.1157	0.2371
MgO	17.491	17.015	17.037	17.436	16.333	17.177	16.661	15.5358	17.8099	16.2261	17.3107	18.3873	18.8159
CaO	21.817	21.731	20.516	20.445	20.973	21.576	21.505	17.9013	17.842	21.9852	18.349	21.6665	17.7567
Na2O	0.122	0.18	0.113	0.153	0.235	0.174	0.162	0.2797	0.2463	0.174	0.2091	0.133	0.1838
Total	99.707	99.826	99.903	99.487	99.543	99.665	99.015	100.372	100.082	101.004	99.4174	100.76	100.864
Si4+	1.95125	1.93	1.95108	1.94911	1.93618	1.94679	1.92081	1.93107	1.92672	1.90826	1.9475	1.95896	1.93222
Al3+(tet)	0.04875	0.07	0.04892	0.05089	0.06382	0.05321	0.07919	0.06893	0.07328	0.09174	0.0525	0.04104	0.06778
Al3+(oct)	0.0189	0.02123	0.02174	0.02293	0.02439	0.02502	0.02691	0.02119	0.02589	0.06773	0.0231	0.01728	0.02474
Ti4+	0.00286	0.00421	0.00445	0.00545	0.0076	0.00265	0.00581	0.0135	0.00839	0.00686	0.00702	0.0035	0.00875
Cr3+	0.01111	0.00996	0.00311	0.00561	0.00347	0.01316	0.01367	0.000287471	0.00788	0.00405	0.00573	0.01539	0.00979
Fe3+	0.02167	0.04316	0.02322	0.02237	0.03756	0.02211	0.0386	0.04057	0.04022	0.01849	0.02462	0.01067	0.02867
Fe2+	0.12261	0.122	0.19085	0.16763	0.17528	0.13466	0.13007	0.32366	0.21905	0.15529	0.23683	0.11373	0.20356
Mn2+	0.00514	0.00555	0.00803	0.00461	0.00694	0.00438	0.00416	0.00982	0.00801	0.00416	0.00702	0.00354	0.00727
Mg2+	0.95385	0.92862	0.93298	0.95532	0.89856	0.9384	0.91773	0.85922	0.97266	0.87704	0.9539	0.98895	1.01549
Ca2+	0.85519	0.85249	0.80756	0.80518	0.82937	0.84726	0.85145	0.71164	0.7004	0.85416	0.72679	0.83763	0.68884
Na1+	0.00865	0.01278	0.00805	0.0109	0.01682	0.01236	0.01161	0.02012	0.0175	0.01223	0.01499	0.0093	0.0129
Mg#	88.6099	88.3878	83.0179	85.0724	83.6773	87.4508	87.5864	72.6379	81.6189	84.9577	80.1105	89.6857	83.3017
Wo (%)	44.2726	44.7946	41.8124	41.7597	43.5773	44.1207	44.8308	37.563	37.017	45.2779	37.9024	43.1697	36.1048
En (%)	49.3798	48.7948	48.3059	49.5464	47.2129	48.8668	48.3207	45.3529	51.4061	46.4906	49.7467	50.9687	53.2258
Fs (%)	6.34758	6.41059	9.88168	8.69384	9.20978	7.01252	6.84847	17.0841	11.577	8.23147	12.3509	5.86166	10.6694
Supplementary1 Table 3. Continued
Unit 3	E28R6W127-07	E28R6W127-08	E28R6W127-09	E29R5W0-01	E29R5W0-02	E29R5W0-03	E29R5W0-04	E29R5W0-05	E29R5W0-06	E29R5W0-07	E29R5W0-08	E29R5W0-09	E29R5W0-10
Depth (mbsf)	1108.01	1108.01	1108.01	1115.41	1115.41	1115.41	1115.41	1115.41	1115.41	1115.41	1115.41	1115.41	1115.41
SiO2	52.9905	54.5973	51.0537	51.9186	52.818	51.4584	53.0041	51.9607	51.1345	52.9284	51.5976	50.8966	52.693
TiO2	0.2657	0.1757	0.6759	0.5005	0.329	0.5086	0.1482	0.334	0.4491	0.2022	0.3166	0.3625	0.1265
Al2O3	2.4886	1.57	4.6289	3.1635	2.2146	1.8116	2.4708	1.3559	2.2292	2.0328	2.9478	2.6479	1.9029
Cr2O3	0.2326	0.2125	0.0983	0.3549	0.2534	0.0058	0.656	0.0148	0.0114	0.1294	0.2486	0.0065	0.4447
FeO	6.7928	6.6592	7.6335	7.776	5.9797	13.2871	5.0286	9.8427	10.3908	6.5398	7.0283	9.4726	5.6513
MnO	0.185	0.2022	0.2034	0.2139	0.2002	0.4105	0.1383	0.375	0.2669	0.1911	0.1663	0.4192	0.1716
MgO	17.8037	18.7356	15.4026	16.2651	17.5077	13.7023	17.6973	14.4391	15.4037	17.907	16.1407	15.0274	18.2167
CaO	19.5559	19.228	21.0171	20.4462	21.0353	19.2856	21.4343	21.1324	19.2942	20.2322	21.3528	20.6548	20.5355
Na2O	0.1606	0.1386	0.264	0.2655	0.248	0.2024	0.146	0.287	0.2348	0.1285	0.2077	0.3245	0.1216
Total	100.475	101.519	100.977	100.904	100.586	100.672	100.724	99.7416	99.4146	100.291	100.006	99.812	99.8638
Si4+	1.92779	1.96236	1.86252	1.89383	1.91777	1.92505	1.91869	1.94073	1.90949	1.92761	1.89577	1.8897	1.92223
Al3+(tet)	0.07221	0.03764	0.13748	0.10617	0.08223	0.07495	0.08131	0.05927	0.09051	0.07239	0.10423	0.1103	0.07777
Al3+(oct)	0.0345	0.02887	0.06156	0.02985	0.01255	0.00493	0.02411	0.000417634	0.00761	0.01487	0.02343	0.00558	0.00405
Ti4+	0.00727	0.00475	0.01854	0.01373	0.00898	0.01431	0.00403	0.00938	0.01261	0.00554	0.00875	0.01012	0.00347
Cr3+	0.00669	0.00604	0.00284	0.01024	0.00727	0.000171554	0.01878	0.000437058	0.000336587	0.00373	0.00722	0.000190812	0.01283
Fe3+	0.02781	0.0029	0.05467	0.0574	0.06191	0.05592	0.0406	0.06044	0.07433	0.05179	0.07088	0.10765	0.06255
Fe2+	0.17887	0.19728	0.17823	0.17982	0.11967	0.3598	0.11164	0.24701	0.25018	0.14741	0.14509	0.18648	0.10987
Mn2+	0.0057	0.00616	0.00629	0.00661	0.00616	0.01301	0.00424	0.01186	0.00844	0.0059	0.00518	0.01318	0.0053
Mg2+	0.96552	1.00384	0.83764	0.88443	0.94762	0.76413	0.95497	0.80393	0.85747	0.97217	0.88403	0.83172	0.99063
Ca2+	0.76231	0.74052	0.82156	0.79914	0.81838	0.77306	0.83138	0.84573	0.77201	0.78953	0.84063	0.82171	0.8027
Na1+	0.01133	0.00966	0.01867	0.01878	0.01746	0.01468	0.01025	0.02079	0.017	0.00907	0.0148	0.02336	0.0086
Mg#	84.3701	83.5756	82.4557	83.1037	88.7871	67.9877	89.5336	76.4962	77.4136	86.8338	85.9019	81.685	90.0165
Wo (%)	39.9808	38.1389	44.7126	42.8865	43.4001	40.752	43.8031	44.5902	41.072	41.356	44.9596	44.6603	42.1763
En (%)	50.6383	51.7008	45.5876	47.4635	50.2535	40.2814	50.3151	42.3864	45.6183	50.9229	47.2808	45.2043	52.0509
Fs (%)	9.38096	10.1603	9.6998	9.65008	6.34649	18.9667	5.88177	13.0234	13.3097	7.72116	7.75967	10.1355	5.7728
Supplementary1 Table 3. Continued
Unit 3	E29R5W0-11	E29R5W0-12	E29R5W0-16	E29R5W0-17	E29R5W0-18	E29R5W15-01	E29R5W15-02	E29R5W15-03	E29R5W15-04	E29R5W15-05	E29R5W15-06	E29R5W15-07	E29R5W15-08
Depth (mbsf)	1115.41	1115.41	1115.41	1115.41	1115.41	1115.56	1115.56	1115.56	1115.56	1115.56	1115.56	1115.56	1115.56
SiO2	53.8477	52.8713	51.7105	53.4979	53.4205	54.346	52.409	52.002	53.895	53.583	53.346	53.168	52.183
TiO2	0.1111	0.2577	0.4054	0.2137	0.1064	0.107	0.264	0.33	0.128	0.12	0.152	0.182	0.437
Al2O3	1.2454	1.771	2.1857	1.7715	1.9899	0.853	1.507	1.915	1.427	1.934	1.747	1.766	2.002
Cr2O3	0.3253	0.1095	0.0075	0.0965	0.4743	0.186	0	0.049	0.305	0.198	0.534	0.395	0
FeO	4.2036	9.0084	9.2035	8.2524	5.6358	4.146	8.831	9.256	5.022	5.12	4.087	6.254	8.564
MnO	0.1315	0.2377	0.4768	0.2461	0.1628	0.177	0.534	0.276	0.157	0.169	0.121	0.144	0.268
MgO	18.3748	16.8912	14.6465	17.9522	17.8561	18.069	14.305	15.526	18.41	17.284	16.487	17.298	15.009
CaO	22.1478	19.5962	21.5129	18.709	21.1268	22.47	22.014	20.176	20.715	22.562	23.702	20.695	21.287
Na2O	0.0889	0.1869	0.3012	0.1673	0.1469	0.141	0.316	0.246	0.149	0.105	0.155	0.206	0.275
Total	100.476	100.93	100.45	100.907	100.919	100.495	100.18	99.776	100.208	101.075	100.331	100.108	100.025
Si4+	1.94785	1.93113	1.91224	1.94422	1.9318	1.9676	1.94563	1.93027	1.95668	1.93653	1.94451	1.94378	1.93312
Al3+(tet)	0.05215	0.06887	0.08776	0.05578	0.0682	0.0324	0.05437	0.06973	0.04332	0.06347	0.05549	0.05622	0.06688
Al3+(oct)	0.000955172	0.00737	0.00751	0.0201	0.01662	0.004	0.01157	0.01405	0.01775	0.01891	0.01957	0.01988	0.02053
Ti4+	0.00302	0.00708	0.01127	0.00584	0.00289	0.00291	0.00737	0.00921	0.00349	0.00326	0.00417	0.005	0.01217
Cr3+	0.0093	0.00316	0.000219287	0.00277	0.01356	0.00532	0	0.00144	0.00876	0.00566	0.01539	0.01142	0
Fe3+	0.04208	0.05742	0.07908	0.03301	0.04252	0.02715	0.0508	0.05352	0.02031	0.03974	0.02316	0.02951	0.04175
Fe2+	0.08509	0.21776	0.20556	0.21781	0.12792	0.09839	0.22338	0.23382	0.13217	0.11501	0.10144	0.16171	0.22357
Mn2+	0.00403	0.00735	0.01494	0.00758	0.00499	0.00543	0.01679	0.00868	0.00483	0.00517	0.00374	0.00446	0.00841
Mg2+	0.99084	0.91969	0.8074	0.97256	0.96257	0.9752	0.79165	0.85911	0.99636	0.93117	0.89586	0.94272	0.82884
Ca2+	0.85845	0.76693	0.85243	0.72854	0.81862	0.8717	0.87568	0.80247	0.80584	0.87371	0.92574	0.81069	0.84496
Na1+	0.00624	0.01324	0.0216	0.01179	0.0103	0.0099	0.02275	0.01771	0.01049	0.00736	0.01096	0.0146	0.01975
Mg#	92.0912	80.8556	79.7068	81.7024	88.2694	90.8354	77.9928	78.6061	88.2883	89.0067	89.8285	85.3581	78.7564
Wo (%)	44.3785	40.2721	45.6971	37.9664	42.8797	44.8108	46.315	42.3378	41.6592	45.5082	48.1395	42.3312	44.5333
En (%)	51.2225	48.2934	43.2831	50.683	50.4197	50.1313	41.8703	45.326	51.5081	48.5011	46.5858	49.2251	43.6835
Fs (%)	4.399	11.4346	11.0198	11.3506	6.70057	5.05794	11.8148	12.3362	6.8327	5.99063	5.27476	8.4437	11.7833
Supplementary1 Table 3. Continued
Unit 3	E29R5W15-09	E29R5W15-10	E29R5W15-11	E29R5W15-12	E29R5W15-13	E29R5W15-14	E29R5W15-15	E29R6W66-01	E29R6W66-02	E29R6W66-03	E29R6W66-04	E29R6W66-05	E29R6W66-06
Depth (mbsf)	1115.56	1115.56	1115.56	1115.56	1115.56	1115.56	1115.56	1117.57	1117.57	1117.57	1117.57	1117.57	1117.57
SiO2	51.487	51.357	51.95	53.164	51.749	52.907	51.368	52.174	53.051	52.774	54.027	52.961	52.136
TiO2	0.4	0.369	0.373	0.176	0.326	0.206	0.313	0.265	0.199	0.188	0.052	0.239	0.305
Al2O3	2.596	3.271	2.351	2.003	3.136	1.896	3.43	1.816	1.734	1.879	1.176	1.663	1.963
Cr2O3	0.005	0.359	0.064	0.378	0.383	0.016	0.348	0.22	0.363	0.205	0.576	0.134	0.03
FeO	8.607	5.824	8.675	4.441	6.038	8.275	6.06	6.633	5.867	5.197	3.848	7.312	9.158
MnO	0.359	0.148	0.304	0.091	0.199	0.238	0.153	0.203	0.17	0.156	0.117	0.194	0.281
MgO	14.588	15.343	15.669	16.335	15.529	15.862	15.225	17.136	16.944	16.516	17.363	17.151	15.394
CaO	21.631	23.243	20.188	23.428	22.792	20.642	23.094	20.594	21.674	22.911	22.929	20.07	20.505
Na2O	0.273	0.213	0.195	0.158	0.21	0.172	0.223	0.182	0.163	0.117	0.166	0.146	0.188
Total	99.946	100.127	99.769	100.174	100.362	100.214	100.214	99.223	100.165	99.943	100.254	99.87	99.96
Si4+	1.91033	1.88536	1.92528	1.94193	1.89575	1.94998	1.88519	1.92575	1.94005	1.93369	1.96465	1.94635	1.93305
Al3+(tet)	0.08967	0.11464	0.07472	0.05807	0.10425	0.05002	0.11481	0.07425	0.05995	0.06631	0.03535	0.05365	0.06695
Al3+(oct)	0.02386	0.0269	0.02798	0.02817	0.03116	0.03234	0.03356	0.00476	0.0148	0.01485	0.01505	0.01839	0.01884
Ti4+	0.01116	0.01019	0.0104	0.00483	0.00898	0.00571	0.00864	0.00736	0.00547	0.00518	0.00142	0.00661	0.0085
Cr3+	0.00014668	0.01042	0.00188	0.01092	0.01109	0.000466256	0.0101	0.00642	0.0105	0.00594	0.01656	0.00389	0.000879457
Fe3+	0.06297	0.07211	0.03808	0.0205	0.05895	0.01809	0.06974	0.06138	0.03527	0.04347	0.0126	0.02856	0.04374
Fe2+	0.20411	0.1067	0.23079	0.11516	0.12604	0.23698	0.11626	0.14337	0.14417	0.11578	0.10443	0.19618	0.24023
Mn2+	0.01128	0.0046	0.00954	0.00282	0.00618	0.00743	0.00476	0.00635	0.00527	0.00484	0.0036	0.00604	0.00883
Mg2+	0.80686	0.83964	0.86564	0.88946	0.84803	0.87149	0.83293	0.94286	0.92369	0.90212	0.94121	0.9396	0.85084
Ca2+	0.85997	0.91428	0.80167	0.91695	0.89465	0.8152	0.90815	0.81448	0.84928	0.89951	0.89341	0.79033	0.81463
Na1+	0.01964	0.01516	0.01401	0.01119	0.01492	0.01229	0.01587	0.01303	0.01156	0.00831	0.0117	0.0104	0.01352
Mg#	79.8105	88.725	78.9508	88.537	87.0605	78.621	87.7517	86.8011	86.4992	88.6256	90.0128	82.7273	77.9822
Wo (%)	45.9647	49.1386	42.2353	47.7188	47.8752	42.3771	48.8951	42.8514	44.2995	46.9128	46.0747	41.0323	42.747
En (%)	43.126	45.127	45.6056	46.288	45.3803	45.3036	44.8455	49.6054	48.1804	47.0487	48.5397	48.7824	44.647
Fs (%)	10.9093	5.7344	12.1592	5.99316	6.74449	12.3193	6.25936	7.54315	7.52009	6.03849	5.38553	10.1854	12.606
Supplementary1 Table 3. Continued
Unit 3	E29R6W66-07	E29R6W66-08	E29R6W66-09	E29R6W66-10	E29R6W66-11	E29R6W66-12	E29R6W66-13	E29R6W66-14	E29R6W66-15	E29R6W66-16	E29R6W66-17	E29R6W66-18	E34R4W90-01
Depth (mbsf)	1117.57	1117.57	1117.57	1117.57	1117.57	1117.57	1117.57	1117.57	1117.57	1117.57	1117.57	1117.57	1163.23
SiO2	52.453	53.5	53.099	53.003	53.163	53.022	52.013	53.532	52.259	52.09	53.09	52.335	50.996
TiO2	0.22	0.141	0.154	0.174	0.205	0.18	0.33	0.089	0.263	0.298	0.242	0.203	0.423
Al2O3	2.173	1.847	1.776	1.746	1.765	1.859	2.403	1.387	1.808	2.542	2.24	2.523	2.41
Cr2O3	0.185	0.4	0.541	0.19	0.108	0.191	0.103	0.45	0.119	0.141	0.416	0.122	0.192
FeO	5.481	4.98	6.191	6.974	5.314	6.329	8.089	4.868	9.12	6.578	5.457	5.448	8.125
MnO	0.129	0.182	0.18	0.211	0.146	0.174	0.228	0.159	0.266	0.189	0.151	0.114	0.229
MgO	16.334	16.933	17.648	17	16.602	16.655	15.522	17.032	15.144	15.782	16.128	15.968	15.574
CaO	22.635	22.656	20.022	20.437	22.556	21.555	21.033	21.835	20.369	22.108	22.808	22.981	20.725
Na2O	0.166	0.137	0.189	0.167	0.15	0.129	0.26	0.163	0.206	0.209	0.229	0.119	0.253
Total	99.776	100.776	99.8	99.902	100.009	100.094	99.981	99.515	99.554	99.937	100.761	99.813	98.927
Si4+	1.92588	1.94189	1.94512	1.94654	1.94631	1.94373	1.92084	1.96633	1.94752	1.91677	1.93304	1.92286	1.90267
Al3+(tet)	0.07412	0.05811	0.05488	0.05346	0.05369	0.05627	0.07916	0.03367	0.05248	0.08323	0.06696	0.07714	0.09733
Al3+(oct)	0.01992	0.02091	0.02181	0.02212	0.02247	0.02405	0.02544	0.02638	0.02694	0.02703	0.02918	0.03212	0.00866
Ti4+	0.00607	0.00385	0.00424	0.00481	0.00564	0.00496	0.00917	0.00246	0.00737	0.00825	0.00663	0.00561	0.01187
Cr3+	0.00537	0.01148	0.01567	0.00552	0.00313	0.00554	0.00301	0.01307	0.00351	0.0041	0.01198	0.00354	0.00566
Fe3+	0.0485	0.02767	0.02234	0.0281	0.02745	0.02593	0.05099	0.000916964	0.02218	0.05052	0.02872	0.03874	0.07758
Fe2+	0.1198	0.1235	0.16733	0.1861	0.13525	0.16811	0.19884	0.14863	0.26206	0.15192	0.13746	0.12866	0.17595
Mn2+	0.00401	0.0056	0.00559	0.00656	0.00453	0.0054	0.00713	0.00495	0.0084	0.00589	0.00466	0.00355	0.00724
Mg2+	0.89401	0.91621	0.96371	0.93068	0.90605	0.91015	0.85451	0.9326	0.8413	0.8657	0.87538	0.87457	0.8662
Ca2+	0.8905	0.88115	0.78589	0.80422	0.88483	0.84668	0.83229	0.85939	0.81336	0.87169	0.88984	0.90473	0.82855
Na1+	0.01182	0.00964	0.01342	0.01189	0.01065	0.00917	0.01862	0.01161	0.01489	0.01491	0.01617	0.00848	0.0183
Mg#	88.1832	88.1217	85.2057	83.336	87.0114	84.4091	81.1231	86.2536	76.2489	85.071	86.4283	87.1754	83.1166
Wo (%)	46.7624	45.8725	40.9974	41.8646	45.9381	43.9848	44.1384	44.2842	42.4351	46.1379	46.7676	47.4185	44.2908
En (%)	46.9466	47.6978	50.2735	48.4478	47.0399	47.2818	45.3167	48.057	43.8926	45.8211	46.008	45.8379	46.3035
Fs (%)	6.29103	6.42963	8.72914	9.68753	7.02196	8.73337	10.5449	7.65873	13.6723	8.04094	7.22439	6.74357	9.40575
Supplementary1 Table 3. Continued
Unit 3	E34R4W90-02	E34R4W90-03	E34R4W90-04	E34R4W90-05	E34R4W90-06	E34R4W90-07	E34R4W90-08	E34R4W90-09	E34R4W90-10	E34R4W90-11	E34R4W90-12	E35R5W84-01	E35R5W84-02
Depth (mbsf)	1163.23	1163.23	1163.23	1163.23	1163.23	1163.23	1163.23	1163.23	1163.23	1163.23	1163.23	1173.86	1173.86
SiO2	52.079	51.527	50.84	52.232	51.786	52.185	52.04	51.989	51.258	52.222	52.026	51.0801	52.3613
TiO2	0.315	0.328	0.34	0.282	0.329	0.227	0.275	0.282	0.248	0.279	0.308	0.6911	0.2243
Al2O3	1.881	2.259	2.952	2.153	2.237	2.507	2.51	2.068	3.328	2.521	2.922	3.5066	2.5671
Cr2O3	0.048	0.157	0.155	0.111	0.191	0.385	0.131	0.165	0.607	0.325	0.313	0.1017	0.1877
FeO	7.395	6.491	6.538	6.207	7.472	5.25	5.627	6.116	5.488	5.539	5.543	8.9683	4.7137
MnO	0.22	0.201	0.174	0.174	0.191	0.114	0.145	0.166	0.128	0.159	0.188	0.2235	0.1438
MgO	16.218	16.068	15.581	16.255	15.963	16.046	15.875	15.818	15.6	16.063	15.804	15.7077	17.409
CaO	21.109	21.684	22.301	21.904	20.765	22.937	22.843	21.868	22.714	22.145	22.54	20.6609	22.5399
Na2O	0.193	0.246	0.172	0.178	0.235	0.184	0.177	0.18	0.224	0.205	0.219	0.3128	0.1775
Total	99.458	98.961	99.053	99.496	99.169	99.835	99.623	98.652	99.595	99.458	99.863	101.253	100.324
Si4+	1.92688	1.91153	1.887	1.92641	1.92275	1.91582	1.91637	1.93654	1.88843	1.92526	1.91132	1.86316	1.90032
Al3+(tet)	0.07312	0.08847	0.113	0.07359	0.07725	0.08418	0.08363	0.06346	0.11157	0.07474	0.08868	0.13684	0.09968
Al3+(oct)	0.00891	0.01031	0.01615	0.02	0.02064	0.0243	0.02532	0.02734	0.03295	0.03481	0.03785	0.01392	0.01014
Ti4+	0.00877	0.00915	0.00949	0.00782	0.00919	0.00627	0.00762	0.0079	0.00687	0.00774	0.00851	0.01896	0.00612
Cr3+	0.0014	0.00461	0.00455	0.00324	0.00561	0.01118	0.00381	0.00486	0.01768	0.00947	0.00909	0.00293	0.00539
Fe3+	0.05913	0.07294	0.08569	0.04744	0.04955	0.04927	0.05191	0.02846	0.0632	0.02963	0.04031	0.1042	0.0844
Fe2+	0.1697	0.12845	0.11726	0.14402	0.18247	0.11193	0.12139	0.16207	0.1059	0.14115	0.12999	0.16938	0.05867
Mn2+	0.00689	0.00632	0.00547	0.00544	0.00601	0.00355	0.00452	0.00524	0.00399	0.00497	0.00585	0.00691	0.00442
Mg2+	0.8945	0.88858	0.86209	0.89369	0.88351	0.87814	0.87145	0.87833	0.85675	0.88278	0.86551	0.85408	0.94185
Ca2+	0.83686	0.86195	0.88692	0.86562	0.82611	0.90228	0.90134	0.87281	0.89666	0.8748	0.88728	0.8075	0.87652
Na1+	0.01385	0.0177	0.01238	0.01273	0.01692	0.0131	0.01264	0.013	0.016	0.01465	0.0156	0.02212	0.01249
Mg#	84.0537	87.3701	88.0268	86.1214	82.8824	88.6947	87.7735	84.4223	88.9991	86.2149	86.9422	83.45	94.1357
Wo (%)	44.0209	45.8732	47.5239	45.4793	43.661	47.6803	47.5846	45.6203	48.2255	46.0728	47.1261	44.1023	46.697
En (%)	47.0526	47.2908	46.1932	46.954	46.6952	46.405	46.0069	45.9087	46.079	46.4933	45.9695	46.6466	50.1772
Fs (%)	8.92656	6.83599	6.28287	7.56666	9.64379	5.91469	6.4085	8.471	5.6955	7.43387	6.90432	9.25108	3.12582
Supplementary1 Table 3. Continued
Unit 3	E35R5W84-03	E35R5W84-04	E35R5W84-05	E35R5W84-06	E35R5W84-07	E35R5W84-08	E35R5W84-09	E35R5W84-10	E35R5W84-11	E35R5W84-12	E35R5W84-13	E35R5W84-14	E35R5W84-15
Depth (mbsf)	1173.86	1173.86	1173.86	1173.86	1173.86	1173.86	1173.86	1173.86	1173.86	1173.86	1173.86	1173.86	1173.86
SiO2	52.1642	52.3672	53.0609	53.3832	52.3849	52.8384	51.8895	52.9262	52.4655	53.4331	53.0586	51.4256	51.6568
TiO2	0.2164	0.337	0.2685	0.1612	0.2296	0.1681	0.3824	0.1901	0.3598	0.1512	0.2919	0.2921	0.4471
Al2O3	2.448	2.0241	1.9874	1.9378	2.4344	2.2491	2.7217	2.3178	2.4204	1.9309	2.214	2.9992	3.0579
Cr2O3	0.1973	0.0476	0.1057	0.6012	0.5022	0.4027	0.1382	0.2199	0.1012	0.3857	0.3413	0.8201	0.155
FeO	4.6345	9.0184	8.3591	4.7588	5.0091	5.0341	7.6337	4.794	8.6385	4.4219	6.3473	5.5152	8.0781
MnO	0.0887	0.3159	0.2736	0.1965	0.1803	0.1447	0.2256	0.1244	0.2901	0.0963	0.141	0.1063	0.2781
MgO	17.7593	16.8509	17.3355	17.3741	17.0528	17.1093	16.5036	17.3982	17.5927	17.7096	17.9241	16.7174	16.216
CaO	22.2145	19.3272	19.7308	22.2383	22.8888	22.1312	20.9494	22.6291	18.8647	22.1299	20.2454	22.3144	20.4478
Na2O	0.1416	0.1906	0.2157	0.1828	0.1835	0.1949	0.2425	0.1366	0.237	0.1583	0.2275	0.2188	0.2478
Total	99.8645	100.479	101.337	100.834	100.866	100.272	100.687	100.736	100.97	100.417	100.791	100.409	100.585
Si4+	1.89911	1.92081	1.924	1.93255	1.89684	1.92379	1.89396	1.91523	1.90718	1.93727	1.92173	1.87366	1.89089
Al3+(tet)	0.10089	0.07919	0.076	0.06745	0.10316	0.07621	0.10604	0.08477	0.09282	0.06273	0.07827	0.12634	0.10911
Al3+(oct)	0.00416	0.00832	0.00895	0.01524	0.00073839	0.02031	0.01106	0.0141	0.01089	0.01979	0.01625	0.00246	0.02283
Ti4+	0.00593	0.0093	0.00732	0.00439	0.00625	0.0046	0.0105	0.00517	0.00984	0.00412	0.00795	0.008	0.01231
Cr3+	0.00568	0.00138	0.00303	0.01721	0.01438	0.01159	0.00399	0.00629	0.00291	0.01106	0.00977	0.02362	0.00449
Fe3+	0.08919	0.06445	0.06454	0.03905	0.08842	0.04887	0.08716	0.06361	0.07606	0.03476	0.05232	0.0997	0.07476
Fe2+	0.05192	0.2122	0.18895	0.10502	0.06327	0.10442	0.14587	0.08147	0.18656	0.09932	0.13995	0.06836	0.17254
Mn2+	0.00274	0.00981	0.0084	0.00603	0.00553	0.00446	0.00697	0.00381	0.00893	0.00296	0.00433	0.00328	0.00862
Mg2+	0.96381	0.92138	0.93704	0.9376	0.92047	0.9286	0.89797	0.93852	0.95332	0.95715	0.96775	0.90797	0.88486
Ca2+	0.86658	0.75961	0.7666	0.86263	0.88806	0.86339	0.81933	0.87743	0.73479	0.85971	0.7857	0.87115	0.80201
Na1+	0.01	0.01356	0.01517	0.01283	0.01288	0.01376	0.01716	0.00958	0.01671	0.01113	0.01598	0.01546	0.01759
Mg#	94.8888	81.2807	83.2191	89.9269	93.5688	89.8919	86.026	92.0125	83.6331	90.5989	87.3657	92.9986	83.6829
Wo (%)	46.0381	40.1233	40.5055	45.2762	47.4442	45.5276	43.9752	46.2432	39.1955	44.866	41.4968	47.1535	43.1327
En (%)	51.2038	48.6683	49.5108	49.2114	49.1758	48.9663	48.1959	49.463	50.8527	49.9508	51.1118	49.1465	47.5882
Fs (%)	2.75808	11.2085	9.98371	5.51238	3.37996	5.50614	7.82892	4.2938	9.95179	5.18322	7.39146	3.70001	9.27907
Supplementary1 Table 3. Continued
Unit 3	E35R5W84-16	E35R5W84-17	E35R5W84-18	E35R5W84-19	E35R5W84-20	E35R5W84-21	E36R6W60-01	E36R6W60-02	E36R6W60-03	E37R1W51-01	E37R1W51-02	E37R1W51-03	E37R5W121-01
Depth (mbsf)	1173.86	1173.86	1173.86	1173.86	1173.86	1173.86	1184.41	1184.41	1184.41	1187.71	1187.71	1187.71	1193.82
SiO2	50.4616	51.8448	50.3205	51.503	52.1395	51.1819	51.578	52.18	52.129	50.749	51.634	50.69	51.8997
TiO2	0.597	0.3237	0.5164	0.4294	0.2785	0.4109	0.324	0.292	0.439	0.41	0.363	0.374	0.3932
Al2O3	4.5275	3.2382	4.2548	2.8675	3.3658	4.695	1.973	1.905	1.943	2.323	1.981	2.563	2.598
Cr2O3	0.1187	0.2818	0.0519	0.3282	0.5769	0.9363	0.054	0.149	0.087	0.036	0.129	0.039	0.2119
FeO	8.5257	6.4735	8.2374	6.6859	4.7172	5.2511	10.212	6.985	9.031	9.109	8.502	8.579	8.0639
MnO	0.2134	0.2346	0.2018	0.189	0.1088	0.1017	0.359	0.19	0.255	0.319	0.289	0.219	0.2496
MgO	15.3335	16.588	15.4425	16.0958	16.791	16.2411	15.403	15.624	15.542	14.711	16.137	14.84	16.4875
CaO	20.5268	21.1699	20.3151	22.3511	22.7273	22.5207	19.339	21.609	19.901	21.01	19.804	21.473	20.0225
Na2O	0.2302	0.2092	0.2438	0.239	0.1767	0.2196	0.211	0.193	0.201	0.309	0.229	0.152	0.2491
Total	100.534	100.364	99.5842	100.689	100.882	101.558	99.453	99.127	99.528	98.976	99.068	98.929	100.175
Si4+	1.85264	1.89288	1.86225	1.87926	1.88681	1.84422	1.92587	1.94006	1.94024	1.90154	1.92272	1.89835	1.9064
Al3+(tet)	0.14736	0.10712	0.13775	0.12074	0.11319	0.15578	0.07413	0.05994	0.05976	0.09846	0.07728	0.10165	0.0936
Al3+(oct)	0.04857	0.03223	0.04784	0.00259	0.03037	0.04362	0.0127	0.02354	0.02548	0.00414	0.00967	0.01149	0.01888
Ti4+	0.01648	0.00889	0.01437	0.01178	0.00758	0.01113	0.0091	0.00816	0.01229	0.01155	0.01017	0.01053	0.01086
Cr3+	0.00345	0.00813	0.00152	0.00947	0.01651	0.02667	0.00159	0.00438	0.00256	0.00107	0.0038	0.00115	0.00615
Fe3+	0.07876	0.06379	0.07714	0.10202	0.06356	0.07855	0.05692	0.02961	0.02165	0.0926	0.06002	0.07898	0.06458
Fe2+	0.18302	0.13388	0.17781	0.10201	0.07921	0.07969	0.26198	0.18759	0.25947	0.19285	0.20476	0.18972	0.18314
Mn2+	0.00664	0.00726	0.00633	0.00584	0.00334	0.0031	0.01135	0.00598	0.00804	0.01012	0.00912	0.00695	0.00777
Mg2+	0.83919	0.90282	0.85192	0.8755	0.90579	0.87237	0.85735	0.86595	0.86233	0.82169	0.89576	0.82847	0.9028
Ca2+	0.80751	0.82819	0.80557	0.87387	0.88126	0.86951	0.77373	0.86087	0.79368	0.84353	0.79018	0.86167	0.78806
Na1+	0.01639	0.01481	0.01749	0.01691	0.0124	0.01534	0.01528	0.01391	0.01451	0.02245	0.01653	0.01104	0.01774
Mg#	82.096	87.0859	82.7325	89.5642	91.9585	91.6299	76.5949	82.1943	76.8702	80.9914	81.3942	81.3669	83.1351
Wo (%)	44.1329	44.4096	43.8932	47.201	47.2206	47.734	40.872	44.9681	41.4351	45.398	41.7931	45.8369	42.0523
En (%)	45.8646	48.4114	46.4185	47.289	48.5351	47.8913	45.289	45.2332	45.019	44.223	47.3772	44.0709	48.1749
Fs (%)	10.0024	7.179	9.68826	5.51	4.24427	4.37472	13.839	9.79876	13.5459	10.3791	10.8297	10.0922	9.77282
Supplementary1 Table 3. Continued
Unit 3	E37R5W121-02	E37R5W121-03	E37R5W121-04	E42R1W28-01	E42R1W28-02	E42R1W28-03	E42R1W28-04	E44R2W32-01	E44R2W32-02	E44R2W32-03	E44R2W32-04	E44R2W32-05	E44R2W32-06
Depth (mbsf)	1193.82	1193.82	1193.82	1226.25	1226.25	1226.25	1226.25	1256.6	1256.6	1256.6	1256.6	1256.6	1256.6
SiO2	52.1221	51.2863	51.905	51.88	52.565	52.175	52.837	50.509	51.422	52.17	52.139	51.824	51.315
TiO2	0.1618	0.3998	0.4472	0.32	0.34	0.355	0.149	0.344	0.358	0.347	0.356	0.34	0.545
Al2O3	2.0967	4.15	2.7527	1.762	1.315	1.621	2.596	2.158	2.005	1.297	1.828	1.621	2.923
Cr2O3	0.0509	0.9185	0.2086	0.039	0.02	0.01	0.347	0.081	0.058	0.043	0.034	0.023	0.046
FeO	7.5869	4.9056	8.8184	12.599	11.93	12.094	5.752	12.299	12.095	10.599	12.196	12.076	8.262
MnO	0.1876	0.1603	0.4616	0.449	0.579	0.556	0.247	0.331	0.267	0.672	0.362	0.383	0.25
MgO	16.8808	16.4816	16.5481	14.731	13.585	13.253	17.296	14.396	14.688	13.733	14.23	14.319	14.855
CaO	20.9354	22.8286	19.5871	18.149	19.919	19.882	19.94	18.681	18.762	20.543	19.147	18.357	21.462
Na2O	0.1196	0.2184	0.2438	0.203	0.246	0.257	0.26	0.247	0.231	0.238	0.231	0.277	0.264
Total	100.142	101.349	100.972	100.132	100.499	100.203	99.424	99.046	99.886	99.642	100.523	99.22	99.922
Si4+	1.9112	1.84988	1.89529	1.94043	1.96641	1.95955	1.93975	1.90784	1.92432	1.96179	1.94419	1.95591	1.90089
Al3+(tet)	0.0888	0.15012	0.10471	0.05957	0.03359	0.04045	0.06025	0.09216	0.07568	0.03821	0.05581	0.04409	0.09911
Al3+(oct)	0.00182	0.02631	0.01376	0.01811	0.0244	0.03131	0.05209	0.00392	0.01276	0.01928	0.02453	0.02802	0.02852
Ti4+	0.00446	0.01085	0.01228	0.009	0.00957	0.01003	0.00411	0.00977	0.01008	0.00981	0.00998	0.00965	0.01518
Cr3+	0.00148	0.02619	0.00602	0.00115	0.000591557	0.000296949	0.01007	0.00242	0.00172	0.00128	0.001	0.000686332	0.00135
Fe3+	0.08509	0.0912	0.07763	0.03703	0.00731	0.00751	0.00837	0.08436	0.05782	0.01538	0.02701	0.01635	0.05784
Fe2+	0.14757	0.05678	0.19166	0.35708	0.36593	0.37236	0.16824	0.30417	0.32072	0.31794	0.35333	0.36481	0.19812
Mn2+	0.00583	0.0049	0.01428	0.01423	0.01835	0.01769	0.00768	0.01059	0.00846	0.0214	0.01143	0.01224	0.00784
Mg2+	0.92271	0.8862	0.90075	0.82133	0.75758	0.74199	0.94655	0.8106	0.81937	0.76981	0.79099	0.8056	0.8203
Ca2+	0.82254	0.8823	0.76635	0.72735	0.79843	0.80011	0.78438	0.75608	0.75232	0.82773	0.76502	0.74236	0.85188
Na1+	0.0085	0.01527	0.01726	0.01472	0.01784	0.01872	0.01851	0.01809	0.01676	0.01735	0.0167	0.02027	0.01896
Mg#	86.2121	93.9786	82.455	69.6981	67.4297	66.585	84.9084	72.7146	71.8689	70.7709	69.1231	68.8306	80.5463
Wo (%)	43.4559	48.3378	41.2292	38.166	41.5431	41.7929	41.3013	40.4139	39.7546	43.2125	40.0672	38.8106	45.5475
En (%)	48.7478	48.5514	48.4594	43.0974	39.4173	38.7571	49.8402	43.3279	43.2978	40.1889	41.4274	42.1169	43.8594
Fs (%)	7.79627	3.11081	10.3113	18.7366	19.0396	19.45	8.85851	16.2582	16.9477	16.5986	18.5054	19.0725	10.5931
Supplementary1 Table 3. Continued
Unit 3	E44R2W32-07	E44R2W32-08	E44R2W32-09	E44R2W32-10	E44R2W32-11	E44R2W32-12	E44R2W32-13	E44R2W32-14	E44R2W32-15	E44R3W11-01	E44R3W11-02	E44R3W11-03	E44R3W11-04
Depth (mbsf)	1256.6	1256.6	1256.6	1256.6	1256.6	1256.6	1256.6	1256.6	1256.6	1257.77	1257.77	1257.77	1257.77
SiO2	52.797	52.832	52.07	52.27	51.139	52.344	51.857	51.29	51.742	51.919	51.702	52.132	52.008
TiO2	0.306	0.156	0.536	0.354	0.617	0.226	0.337	0.644	0.476	0.395	0.391	0.217	0.239
Al2O3	2.387	2.066	2.536	2.529	3.424	2.149	3.471	3.8	3.82	1.677	1.758	1.754	1.46
Cr2O3	0.261	0.598	0.046	0.234	0.407	0.08	0.525	0.335	0.753	0.026	0.015	0.017	0.018
FeO	7.443	3.568	8.295	6.906	7.218	10.169	4.815	7.332	5.814	12.207	12.653	12.835	10.74
MnO	0.283	0.043	0.261	0.227	0.302	0.234	0.114	0.178	0.176	0.592	0.349	0.383	0.465
MgO	16.687	16.524	15.266	16.052	15.439	15.249	15.815	15.038	15.87	13.975	14.004	14.091	13.815
CaO	20.2	23.21	20.772	20.637	20.717	18.958	22.822	21.246	21.191	18.987	18.641	18.877	20.172
Na2O	0.232	0.144	0.286	0.265	0.226	0.218	0.169	0.27	0.291	0.228	0.239	0.196	0.213
Total	100.596	99.141	100.068	99.474	99.489	99.627	99.925	100.133	100.133	100.006	99.752	100.502	99.13
Si4+	1.92899	1.94488	1.92449	1.9319	1.89571	1.95166	1.90131	1.89076	1.8964	1.94922	1.94605	1.948	1.96404
Al3+(tet)	0.07101	0.05512	0.07551	0.0681	0.10429	0.04834	0.09869	0.10924	0.1036	0.05078	0.05395	0.052	0.03596
Al3+(oct)	0.03179	0.03452	0.03497	0.04207	0.04532	0.0461	0.05132	0.05587	0.06143	0.02343	0.02404	0.02526	0.02903
Ti4+	0.00841	0.00432	0.0149	0.00984	0.0172	0.00634	0.00929	0.01785	0.01312	0.01115	0.01107	0.0061	0.00679
Cr3+	0.00754	0.01741	0.00134	0.00684	0.01193	0.00236	0.01522	0.00976	0.02182	0.000771786	0.000446402	0.000502254	0.000537455
Fe3+	0.0313	0.00484	0.02989	0.01851	0.02888	0.00296	0.02558	0.0272	0.01479	0.02087	0.02477	0.02824	0.00841
Fe2+	0.19613	0.10501	0.22651	0.19496	0.1949	0.31413	0.12206	0.19885	0.16342	0.36242	0.37353	0.37286	0.33079
Mn2+	0.00876	0.00134	0.00817	0.00711	0.00948	0.00739	0.00354	0.00556	0.00546	0.01883	0.01113	0.01212	0.01487
Mg2+	0.90884	0.90677	0.84109	0.8844	0.85316	0.84756	0.86438	0.82639	0.86707	0.78212	0.78576	0.7849	0.77772
Ca2+	0.7908	0.91551	0.82262	0.81728	0.82289	0.7574	0.89659	0.83922	0.83221	0.76381	0.75181	0.75581	0.81625
Na1+	0.01644	0.01028	0.0205	0.01899	0.01624	0.01576	0.01201	0.0193	0.02068	0.0166	0.01744	0.0142	0.0156
Mg#	82.2502	89.6213	78.7832	81.9374	81.4037	72.9592	87.6262	80.6045	84.1415	68.3349	67.7794	67.7947	70.159
Wo (%)	41.7139	47.5024	43.5198	43.0909	43.9826	39.4666	47.6141	45.0114	44.6777	40.0246	39.3392	39.4972	42.4079
En (%)	47.9406	47.0491	44.4969	46.6298	45.6004	44.1645	45.9036	44.3232	46.5491	40.9843	41.1153	41.0176	40.4058
Fs (%)	10.3455	5.44854	11.9833	10.2793	10.417	16.3689	6.48234	10.6654	8.77324	18.9911	19.5455	19.4851	17.1863
Supplementary1 Table 3. Continued
Unit 3	E44R3W11-06	E44R3W11-07	E44R3W11-08	E44R3W11-09	E44R3W11-10	E44R3W11-11	E44R3W11-12	E44R3W11-13	E44R3W11-14	E44R6W54-01	E44R6W54-02	E44R6W54-03	E44R6W54-04
Depth (mbsf)	1257.77	1257.77	1257.77	1257.77	1257.77	1257.77	1257.77	1257.77	1257.77	1261.87	1261.87	1261.87	1261.87
SiO2	51.555	51.612	51.945	51.784	52.363	50.887	49.677	49.813	50.471	51.8029	53.2021	51.7731	52.9162
TiO2	0.358	0.581	0.299	0.637	0.531	0.653	0.839	0.851	0.594	0.322	0.2887	0.2968	0.2464
Al2O3	1.692	2.044	1.749	2.24	2.148	3.111	4.222	4.429	4.306	2.9347	1.1958	1.1421	1.0786
Cr2O3	0.03	0.055	0.01	0.005	0.073	0.062	0.259	0.524	0.484	0.0246	0.0033	0.0066	0.0099
FeO	12.254	12.304	10.489	11.2	9.875	9.696	8.191	7.436	6.306	8.8053	10.5115	12.3436	12.1475
MnO	0.319	0.414	0.519	0.276	0.288	0.232	0.233	0.283	0.22	0.2311	0.644	0.7701	0.8803
MgO	13.681	14.252	13.872	14.496	16.578	15.374	14.95	15.271	14.627	15.6833	14.3953	13.8562	14.6687
CaO	18.878	18.074	20.089	18.859	17.301	18.355	20.008	19.789	22.073	20.9332	20.5457	19.1786	18.9971
Na2O	0.229	0.284	0.211	0.236	0.292	0.366	0.241	0.262	0.226	0.1554	0.2403	0.277	0.2317
Total	98.996	99.62	99.183	99.733	99.449	98.736	98.62	98.658	99.307	100.892	101.027	99.6441	101.176
Si4+	1.95605	1.94203	1.95899	1.9398	1.94528	1.90776	1.8618	1.86177	1.87398	1.89765	1.96849	1.95249	1.96064
Al3+(tet)	0.04395	0.05797	0.04101	0.0602	0.05472	0.09224	0.1382	0.13823	0.12602	0.10235	0.03151	0.04751	0.03936
Al3+(oct)	0.03171	0.03269	0.03674	0.0387	0.03934	0.04523	0.04831	0.05689	0.06243	0.02436	0.02064	0.00326	0.00775
Ti4+	0.01022	0.01644	0.00848	0.01795	0.01484	0.01841	0.02365	0.02392	0.01659	0.00887	0.00803	0.00842	0.00687
Cr3+	0.000899949	0.00164	0.000298179	0.000148088	0.00214	0.00184	0.00767	0.01548	0.01421	0.000712501	9.65397e-05	0.000196796	0.000290023
Fe3+	0.00776	0.01148	0.00244	0.0026	0.00459	0.03495	0.05243	0.03701	0.03248	0.07057	0.01195	0.04747	0.03424
Fe2+	0.38107	0.37572	0.32839	0.34828	0.30222	0.26906	0.20431	0.19543	0.16334	0.19919	0.31332	0.34184	0.34218
Mn2+	0.01025	0.0132	0.01658	0.00876	0.00906	0.00737	0.0074	0.00896	0.00692	0.00717	0.02018	0.0246	0.02763
Mg2+	0.77378	0.79941	0.77986	0.80947	0.91808	0.8592	0.83524	0.85083	0.80959	0.85642	0.79399	0.77897	0.8102
Ca2+	0.76746	0.72871	0.81179	0.75696	0.68869	0.73734	0.80348	0.7925	0.87817	0.82166	0.81455	0.77499	0.75421
Na1+	0.01685	0.02072	0.01543	0.01714	0.02103	0.02661	0.01751	0.01899	0.01627	0.01104	0.01724	0.02026	0.01665
Mg#	67.0026	68.0274	70.3686	69.9175	75.234	76.1527	80.3463	81.3211	83.2115	81.1304	71.7046	69.5004	70.3065
Wo (%)	39.924	38.2758	42.2798	39.5341	36.0762	39.5229	43.5958	43.1	47.4403	43.7688	42.3836	40.8794	39.558
En (%)	40.2523	41.9896	40.6171	42.2763	48.0924	46.055	45.3187	46.2718	43.7357	45.6206	41.3136	41.0891	42.4946
Fs (%)	19.8237	19.7346	17.1032	18.1895	15.8314	14.4221	11.0855	10.6282	8.82397	10.6106	16.3028	18.0315	17.9474
Supplementary1 Table 3. Continued
Unit 3	E44R6W54-05	E44R6W54-06	E44R6W54-07	E44R6W54-08	E44R6W54-09	E44R6W54-10	E44R6W54-12	E44R6W54-13	E44R6W54-14	E44R6W54-15	E44R6W54-16	E44R6W54-17
Depth (mbsf)	1261.87	1261.87	1261.87	1261.87	1261.87	1261.87	1261.87	1261.87	1261.87	1261.87	1261.87	1261.87
SiO2	51.057	51.8485	51.7146	50.866	51.8816	51.6708	51.7966	50.9496	50.4206	50.9896	52.66	52.7946
TiO2	0.4457	0.5575	0.3081	0.3795	0.4155	0.4504	0.3998	0.7344	0.548	0.4854	0.2587	0.2292
Al2O3	2.4038	3.4739	2.8917	2.4513	3.4427	2.0853	3.0246	4.8169	5.2907	3.448	1.3406	2.3843
Cr2O3	0.001	0.084	0.0555	0.026	0.4093	0.0033	0.0281	0.3357	0.7398	0.1591	0.0136	0.1334
FeO	13.4876	7.8348	9.8861	11.404	7.2698	13.0393	9.4525	7.4528	5.513	9.1076	11.2521	9.8636
MnO	0.545	0.2875	0.3334	0.4317	0.2419	0.6717	0.3529	0.2307	0.2052	0.2295	0.6072	0.2629
MgO	15.4376	15.6649	16.1249	15.2183	16.3716	14.1425	15.6678	14.7758	15.3619	15.9718	14.0757	17.5897
CaO	16.435	20.6648	19.4968	18.2955	19.9204	18.4035	20.0186	21.7363	22.5857	19.0577	20.2347	17.3522
Na2O	0.2014	0.2915	0.2123	0.205	0.2799	0.2646	0.2752	0.3309	0.224	0.3738	0.2761	0.1697
Total	100.014	100.707	101.023	99.2773	100.233	100.731	101.016	101.363	100.889	99.8225	100.719	100.78
Si4+	1.909	1.89775	1.89277	1.90775	1.90124	1.92696	1.89682	1.85555	1.83392	1.88309	1.95817	1.92861
Al3+(tet)	0.091	0.10225	0.10723	0.09225	0.09876	0.07304	0.10318	0.14445	0.16608	0.11691	0.04183	0.07139
Al3+(oct)	0.01494	0.04762	0.01752	0.01611	0.04995	0.01862	0.02737	0.06233	0.06075	0.03319	0.01693	0.03128
Ti4+	0.01253	0.01535	0.00848	0.0107	0.01145	0.01263	0.01101	0.02011	0.01499	0.01348	0.00723	0.0063
Cr3+	2.95624e-05	0.00243	0.00161	0.000771001	0.01186	9.73037e-05	0.000813615	0.00967	0.02128	0.00465	0.00039985	0.00385
Fe3+	0.06556	0.04219	0.08622	0.06887	0.03394	0.04819	0.07252	0.05559	0.06987	0.07888	0.02994	0.03569
Fe2+	0.35619	0.19764	0.21639	0.28883	0.18887	0.35849	0.21698	0.17141	0.09783	0.20242	0.31999	0.26566
Mn2+	0.01726	0.00891	0.01034	0.01371	0.00751	0.02122	0.01095	0.00712	0.00632	0.00718	0.01913	0.00813
Mg2+	0.86044	0.85471	0.87977	0.85084	0.89434	0.78622	0.85531	0.80218	0.83293	0.87929	0.78024	0.95786
Ca2+	0.65844	0.81045	0.76461	0.73524	0.7822	0.7354	0.78551	0.84823	0.88024	0.75415	0.80623	0.67921
Na1+	0.0146	0.02069	0.01507	0.01491	0.01989	0.01913	0.01954	0.02337	0.0158	0.02677	0.01991	0.01202
Mg#	70.723	81.2192	80.2591	74.6565	82.5643	68.6828	79.7646	82.3944	89.4894	81.2869	70.9161	78.2873
Wo (%)	35.1154	43.5071	41.091	39.2147	41.9317	39.1147	42.2818	46.5594	48.6053	41.0786	42.2894	35.6966
En (%)	45.8884	45.883	47.2798	45.3802	47.9436	41.8177	46.0387	44.032	45.9928	47.8954	40.9261	50.3414
Fs (%)	18.9963	10.6098	11.6292	15.4051	10.1246	19.0676	11.6795	9.40856	5.40188	11.026	16.7845	13.962
Supplementary1 Table 3. Continued
Unit 3	E44R6W54-18	E44R6W54-19	E45R2W80-01	E45R2W80-02	E45R2W80-03	E45R2W80-04	E45R2W80-05	E45R2W80-06	E48R3W108-01	E48R3W108-02	E48R3W108-03	E48R3W108-04
Depth (mbsf)	1261.87	1261.87	1266.36	1266.36	1266.36	1266.36	1266.36	1266.36	1295.64	1295.64	1295.64	1295.64
SiO2	50.2921	51.1646	51.641	51.32	51.638	49.861	50.217	50.101	51.417	51.723	52.409	51.785
TiO2	0.7539	0.4464	0.484	0.499	0.433	0.66	0.503	0.552	0.374	0.302	0.241	0.339
Al2O3	4.2639	2.6304	2.348	2.516	2.623	4.233	3.883	4.668	1.918	1.755	1.532	1.753
Cr2O3	0.0154	0.1213	0.265	0.019	0.076	0.238	0.265	0.123	0.041	0.05	0.115	0.023
FeO	7.9854	10.9708	6.789	7.69	7.085	8.137	6.972	6.335	11.227	10.363	9.55	10.32
MnO	0.2503	0.2878	0.198	0.286	0.245	0.199	0.181	0.136	0.35	0.335	0.289	0.297
MgO	14.7328	14.9834	16.5	15.109	15.186	15.158	15.167	14.626	14.67	15.036	16.194	14.82
CaO	20.8349	18.7885	20.8	21.699	22.176	20.862	21.837	22.925	19.702	20.061	19.481	20.164
Na2O	0.3079	0.275	0.26	0.29	0.313	0.386	0.281	0.247	0.281	0.195	0.169	0.237
Total	99.4366	99.6682	99.285	99.428	99.775	99.734	99.306	99.713	99.98	99.82	99.98	99.738
Si4+	1.86836	1.91061	1.90882	1.90629	1.90802	1.84317	1.86129	1.84917	1.91852	1.92823	1.93998	1.93292
Al3+(tet)	0.13164	0.08939	0.09118	0.09371	0.09198	0.15683	0.13871	0.15083	0.08148	0.07177	0.06002	0.06708
Al3+(oct)	0.05507	0.02639	0.01112	0.01645	0.02226	0.02761	0.03093	0.05225	0.00287	0.00534	0.00683	0.01004
Ti4+	0.02106	0.01254	0.01345	0.01394	0.01203	0.01835	0.01402	0.01532	0.0105	0.00847	0.00671	0.00952
Cr3+	0.000452344	0.00358	0.00774	0.000558015	0.00222	0.00696	0.00777	0.00359	0.00121	0.00147	0.00337	0.000678775
Fe3+	0.05618	0.05425	0.06404	0.0697	0.06586	0.11323	0.09216	0.08202	0.07674	0.06212	0.04854	0.05448
Fe2+	0.19192	0.28837	0.14583	0.16919	0.15308	0.13833	0.12396	0.11353	0.27361	0.26098	0.24711	0.26768
Mn2+	0.00788	0.0091	0.0062	0.009	0.00767	0.00623	0.00568	0.00425	0.01106	0.01058	0.00906	0.00939
Mg2+	0.8159	0.83407	0.90917	0.83662	0.83646	0.83529	0.83802	0.80472	0.81598	0.8356	0.89358	0.82461
Ca2+	0.82936	0.75178	0.82381	0.86365	0.87799	0.82633	0.86726	0.90664	0.78771	0.80135	0.77268	0.80646
Na1+	0.02218	0.01991	0.01863	0.02089	0.02243	0.02767	0.0202	0.01768	0.02033	0.0141	0.01213	0.01715
Mg#	80.9565	74.3084	86.1773	83.1787	84.5302	85.7922	87.1141	87.6363	74.8887	76.2006	78.3368	75.4937
Wo (%)	45.1433	40.1114	43.8476	46.1977	47.0135	45.9085	47.4111	49.6819	41.9597	42.2223	40.383	42.4732
En (%)	44.4101	44.5022	48.3907	44.752	44.7897	46.4061	45.8123	44.0971	43.4658	44.0268	46.7021	43.4292
Fs (%)	10.4466	15.3863	7.76169	9.05029	8.19684	7.68538	6.77657	6.22106	14.5746	13.7508	12.9149	14.0976
Supplementary1 Table 3. Continued
Unit 3	E48R3W108-05	E48R3W108-06	E48R3W108-07	E50R1W15-01	E50R1W15-02	E50R1W15-03	E50R1W15-04	E50R1W15-05	E50R1W15-06	E50R1W15-07	E50R1W15-08	E50R1W15-09
Depth (mbsf)	1295.64	1295.64	1295.64	1310.75	1310.75	1310.75	1310.75	1310.75	1310.75	1310.75	1310.75	1310.75
SiO2	51.606	51.492	52.103	52.498	52.6814	52.5638	51.1727	51.1789	51.6122	52.7701	52.831	51.8964
TiO2	0.29	0.39	0.318	0.4168	0.3402	0.2871	0.3691	0.4738	0.3581	0.3456	0.2941	0.3999
Al2O3	1.945	1.675	1.677	2.5011	1.5724	1.3527	3.4501	4.2104	4.1644	1.381	1.2547	1.659
Cr2O3	0.094	0.015	0.006	0.0806	0	0	0.2954	0.2282	0.6661	0.0153	0	0
FeO	10.016	12.002	9.633	8.2511	9.58	10.4553	6.2921	7.7203	5.3595	10.0585	9.785	10.4063
MnO	0.224	0.379	0.329	0.2305	0.5869	0.5495	0.1276	0.2129	0.1223	0.5359	0.5589	0.334
MgO	15.305	13.894	14.676	16.4341	14.9711	14.2935	16.3252	15.3949	16.0107	14.6841	14.8081	14.7955
CaO	19.818	19.461	20.938	20.207	20.9164	20.4099	21.463	20.827	22.5624	20.7073	21.0062	20.5152
Na2O	0.228	0.287	0.249	0.2615	0.2617	0.2167	0.2103	0.2699	0.1914	0.2113	0.2215	0.231
Total	99.526	99.595	99.929	100.881	100.91	100.129	99.7055	100.516	101.047	100.709	100.76	100.237
Si4+	1.92471	1.93851	1.93955	1.9164	1.94152	1.96169	1.88027	1.87633	1.87142	1.95403	1.95309	1.9288
Al3+(tet)	0.07529	0.06149	0.06045	0.0836	0.05848	0.03831	0.11973	0.12367	0.12858	0.04597	0.04691	0.0712
Al3+(oct)	0.01021	0.01283	0.01313	0.02402	0.00982	0.0212	0.0297	0.05828	0.0494	0.0143	0.00776	0.00148
Ti4+	0.00813	0.01104	0.0089	0.01144	0.00943	0.00806	0.0102	0.01306	0.00977	0.00962	0.00818	0.01118
Cr3+	0.00277	0.000446485	0.000176594	0.00233	0	0	0.00858	0.00661	0.0191	0.000447943	0	0
Fe3+	0.06253	0.04708	0.04732	0.05288	0.04851	0.01667	0.07603	0.05183	0.05401	0.02714	0.03868	0.06402
Fe2+	0.24988	0.3308	0.25258	0.19902	0.24677	0.30966	0.11732	0.18488	0.10852	0.28435	0.26385	0.25945
Mn2+	0.00708	0.01209	0.01037	0.00713	0.01832	0.01737	0.00397	0.00661	0.00376	0.01681	0.0175	0.01051
Mg2+	0.85092	0.77973	0.81439	0.89429	0.82248	0.79519	0.89419	0.84137	0.8654	0.81055	0.81606	0.81973
Ca2+	0.79199	0.78503	0.83515	0.79039	0.82597	0.81617	0.84502	0.81816	0.87659	0.8216	0.8321	0.817
Na1+	0.01649	0.02095	0.01797	0.01851	0.0187	0.01568	0.01498	0.01919	0.01346	0.01517	0.01588	0.01665
Mg#	77.3002	70.2124	76.3274	81.7966	76.9214	71.9729	88.4013	81.9847	88.8576	74.0295	75.5674	75.9588
Wo (%)	41.8424	41.4142	43.9063	41.9593	43.5818	42.4862	45.516	44.359	47.3702	42.8698	43.5196	43.0867
En (%)	44.9558	41.1345	42.8149	47.4753	43.3977	41.3943	48.1645	45.6171	46.7655	42.2932	42.6808	43.2307
Fs (%)	13.2019	17.4513	13.2789	10.5654	13.0205	16.1194	6.31947	10.0239	5.86421	14.837	13.7996	13.6826
Supplementary1 Table 3. Continued
Unit 3	E50R1W15-10	E50R1W15-11	E50R1W15-12	E50R1W15-13	E50R1W15-14	E50R1W15-15	E50R1W15-16	E50R1W15-17	E50R1W15-18	E50R1W15-19	E50R1W15-20	E50R1W15-21
Depth (mbsf)	1310.75	1310.75	1310.75	1310.75	1310.75	1310.75	1310.75	1310.75	1310.75	1310.75	1310.75	1310.75
SiO2	52.6043	53.0212	51.4384	52.416	52.037	54.6644	52.8564	50.488	52.884	52.1215	53.1175	52.9175
TiO2	0.4268	0.3537	0.4501	0.337	0.3647	0.2112	0.332	0.4826	0.267	0.2755	0.2404	0.2822
Al2O3	2.2855	1.5694	2.8644	1.4088	1.5313	2.1415	1.5887	5.0085	1.7074	1.6194	2.2779	1.8661
Cr2O3	0.0635	0	0.0206	0.0115	0	0.5038	0.0026	0.6377	0	0.0276	0.0795	0.0685
FeO	10.0276	10.1793	10.2393	11.216	10.8651	3.7113	9.7673	5.8681	10.2404	10.2243	6.0906	9.7075
MnO	0.2861	0.5568	0.4448	0.3808	0.3335	0.0916	0.5762	0.1259	0.3164	0.3207	0.159	0.2849
MgO	15.3274	14.5434	14.1861	13.5789	14.1298	18.3147	14.1457	15.4653	14.8363	14.9177	17.386	14.8268
CaO	20.0443	20.9224	20.8307	20.5106	20.8438	22.0728	21.3396	22.1828	20.677	20.7601	21.5008	21.014
Na2O	0.2945	0.226	0.2136	0.2539	0.2597	0.2032	0.2655	0.2387	0.222	0.2263	0.151	0.2489
Total	101.36	101.372	100.688	100.114	100.365	101.915	100.874	100.498	101.15	100.493	101.003	101.216
Si4+	1.92698	1.95185	1.90528	1.964	1.93831	1.94754	1.95575	1.84332	1.94727	1.93037	1.92241	1.94469
Al3+(tet)	0.07302	0.04815	0.09472	0.036	0.06169	0.05246	0.04425	0.15668	0.05273	0.06963	0.07759	0.05531
Al3+(oct)	0.02566	0.01995	0.03034	0.02622	0.00554	0.03747	0.02504	0.05886	0.02137	0.00107	0.01958	0.02553
Ti4+	0.01176	0.00979	0.01254	0.0095	0.01022	0.00566	0.00924	0.01325	0.00739	0.00767	0.00654	0.0078
Cr3+	0.00184	0	0.000603292	0.000340694	0	0.01419	7.60637e-05	0.01841	0	0.000808206	0.00227	0.00199
Fe3+	0.04292	0.02475	0.05404	0.00889	0.05448	0.00353	0.01971	0.06981	0.03242	0.06865	0.05324	0.02993
Fe2+	0.26429	0.28864	0.26315	0.34258	0.28399	0.10705	0.28254	0.10937	0.28293	0.24803	0.13111	0.26843
Mn2+	0.00888	0.01736	0.01396	0.01209	0.01052	0.00276	0.01806	0.00389	0.00987	0.01006	0.00487	0.00887
Mg2+	0.83698	0.79809	0.78329	0.75846	0.78458	0.97268	0.78024	0.84171	0.81436	0.8236	0.93799	0.81225
Ca2+	0.78676	0.82528	0.82674	0.82348	0.83192	0.84262	0.84605	0.86781	0.8158	0.82385	0.83379	0.82747
Na1+	0.02092	0.01613	0.01534	0.01845	0.01876	0.01404	0.01905	0.0169	0.01585	0.01625	0.0106	0.01774
Mg#	76.0014	73.4394	74.8531	68.8855	73.4233	90.0851	73.4151	88.5006	74.2153	76.8545	87.7367	75.161
Wo (%)	41.6709	43.1629	44.1357	42.7886	43.774	43.8327	44.3229	47.711	42.6429	43.4638	43.8172	43.3652
En (%)	44.3309	41.7408	41.8162	39.4103	41.283	50.5984	40.8754	46.276	42.5677	43.4506	49.2929	42.5673
Fs (%)	13.9982	15.0963	14.0482	17.8011	14.943	5.5689	14.8017	6.01293	14.7894	13.0856	6.88987	14.0675
Supplementary1 Table 3. Continued
Unit 3	E50R1W15-22	E50R1W15-23	E51R2W61-01	E51R2W61-02	E51R2W61-03	E51R2W61-04	E51R2W61-05	E51R2W61-06	E51R2W61-07	E51R2W61-08	E51R2W61-11	E51R2W61-12
Depth (mbsf)	1310.75	1310.75	1321.76	1321.76	1321.76	1321.76	1321.76	1321.76	1321.76	1321.76	1321.76	1321.76
SiO2	52.7468	52.2738	49.7468	51.8041	51.3855	51.3138	49.8494	49.246	52.4053	51.816	50.5052	51.2734
TiO2	0.3196	0.3562	0.7498	0.4353	0.5016	0.4401	0.8107	0.8656	0.5103	0.4416	0.6663	0.379
Al2O3	1.4365	1.9731	5.1941	3.4327	4.4834	4.4359	5.2756	7.2366	2.5749	3.9305	4.9121	3.5636
Cr2O3	0.0166	0.0748	0.229	0.3075	0.7222	0.658	0.3654	0.0697	0	0.4476	0.5064	0.5189
FeO	10.7216	11.746	8.1834	7.1182	5.5405	5.6046	8.116	6.767	9.2199	6.6733	7.2888	6.2019
MnO	0.3435	0.3166	0.1687	0.17	0.1743	0.1297	0.1772	0.1279	0.3349	0.1848	0.1575	0.1264
MgO	14.5051	14.387	14.4309	16.8907	16.2834	16.529	14.6949	13.9053	15.5576	16.6969	15.4846	16.8325
CaO	20.7863	19.2029	22.0182	20.7724	21.8899	21.6197	21.1879	22.734	20.0625	20.1626	21.5076	20.964
Na2O	0.2289	0.1928	0.3107	0.2559	0.2134	0.2041	0.3483	0.2207	0.3124	0.3066	0.2916	0.2294
Total	101.105	100.523	101.032	101.187	101.194	100.935	100.825	101.173	100.978	100.66	101.32	100.089
Si4+	1.94835	1.94662	1.82043	1.8761	1.8594	1.85933	1.82619	1.79459	1.92114	1.88488	1.83456	1.87363
Al3+(tet)	0.05165	0.05338	0.17957	0.1239	0.1406	0.14067	0.17381	0.20541	0.07886	0.11512	0.16544	0.12637
Al3+(oct)	0.01089	0.03322	0.04446	0.02263	0.05062	0.04879	0.05399	0.10542	0.0324	0.05341	0.04487	0.02713
Ti4+	0.00888	0.00998	0.02064	0.01186	0.01365	0.01199	0.02234	0.02372	0.01407	0.01208	0.0182	0.01042
Cr3+	0.000484805	0.0022	0.00663	0.0088	0.02066	0.01885	0.01058	0.00201	0	0.01287	0.01454	0.01499
Fe3+	0.03892	0.01193	0.10926	0.08672	0.05699	0.06338	0.08931	0.06613	0.04053	0.0463	0.09016	0.07967
Fe2+	0.29229	0.35389	0.14119	0.12887	0.11068	0.10646	0.15935	0.1401	0.24214	0.15672	0.13126	0.10987
Mn2+	0.01075	0.00999	0.00523	0.00521	0.00534	0.00398	0.0055	0.00395	0.0104	0.00569	0.00485	0.00391
Mg2+	0.79869	0.79865	0.78721	0.91186	0.87835	0.89281	0.80249	0.75538	0.85019	0.90541	0.83846	0.91692
Ca2+	0.8227	0.76623	0.86334	0.80607	0.84873	0.8394	0.8317	0.88769	0.78807	0.78589	0.83711	0.82084
Na1+	0.01639	0.01392	0.02205	0.01797	0.01497	0.01434	0.02474	0.01559	0.02221	0.02163	0.02054	0.01625
Mg#	73.2083	69.2949	84.7925	87.6174	88.809	89.3463	83.4331	84.3546	77.8327	85.2449	86.4638	89.3
Wo (%)	42.9903	39.9334	48.1847	43.6468	46.1829	45.6525	46.372	49.7818	41.9096	42.526	46.33	44.4269
En (%)	41.7358	41.6231	43.9355	49.3752	47.7944	48.5575	44.7435	42.3614	45.2133	48.9936	46.4051	49.6268
Fs (%)	15.2739	18.4435	7.87982	6.97801	6.02268	5.79005	8.8845	7.85687	12.8771	8.48033	7.2649	5.94631
Supplementary1 Table 3. Continued
Unit 3	E51R2W61-13	E51R2W61-14	E51R2W61-15	E51R2W61-16	E51R2W61-17	E51R2W61-18	E51R2W61-19	E51R2W61-20	E51R2W61-21	E51R2W61-22	E51R2W61-23	E51R2W61-24
Depth (mbsf)	1321.76	1321.76	1321.76	1321.76	1321.76	1321.76	1321.76	1321.76	1321.76	1321.76	1321.76	1321.76
SiO2	51.8638	51.5728	50.009	53.164	51.1236	50.87	51.7085	51.6733	51.1987	50.7743	49.1038	50.4179
TiO2	0.5491	0.6591	0.6196	0.3615	0.5268	0.545	0.5703	0.4735	0.4724	0.6619	0.8431	0.6266
Al2O3	3.799	2.7893	4.7156	2.3139	3.7135	4.3171	3.0332	2.535	3.3924	4.1592	5.2416	4.1494
Cr2O3	0.1551	0.0334	0.4736	0.2875	0.2639	0.0754	0.0096	0.0392	0.3563	0.1951	0.0735	0.1627
FeO	7.5324	9.5683	6.8621	6.0562	6.975	8.028	9.1144	7.8804	6.8081	7.6478	9.1277	8.1565
MnO	0.1602	0.2995	0.129	0.1552	0.1477	0.2768	0.2704	0.2461	0.1641	0.1264	0.1999	0.1675
MgO	15.0224	15.8538	15.2153	17.6716	15.5226	15.1072	15.2812	16.2107	16.3754	15.1139	14.2691	15.0188
CaO	21.8428	19.747	21.9831	21.1547	21.7961	21.5993	20.3186	21.1075	21.5062	22.2986	21.1398	21.5844
Na2O	0.2629	0.32	0.2641	0.14	0.265	0.274	0.3453	0.2108	0.2714	0.2693	0.2987	0.2956
Total	101.188	100.843	100.271	101.305	100.334	101.093	100.651	100.376	100.545	101.246	100.297	100.579
Si4+	1.89248	1.89169	1.83512	1.91809	1.87486	1.85705	1.90118	1.8956	1.86775	1.85008	1.81398	1.85085
Al3+(tet)	0.10752	0.10831	0.16488	0.08191	0.12514	0.14295	0.09882	0.1044	0.13225	0.14992	0.18602	0.14915
Al3+(oct)	0.05588	0.01228	0.03908	0.01649	0.03538	0.04281	0.03263	0.00522	0.01362	0.02871	0.04221	0.0304
Ti4+	0.01507	0.01818	0.0171	0.00981	0.01453	0.01496	0.01577	0.01306	0.01296	0.01814	0.02342	0.0173
Cr3+	0.00447	0.000968645	0.01374	0.0082	0.00765	0.00218	0.000279075	0.00114	0.01028	0.00562	0.00215	0.00472
Fe3+	0.03563	0.08145	0.09665	0.0474	0.0719	0.08744	0.05899	0.08691	0.10164	0.09833	0.11621	0.10047
Fe2+	0.19423	0.21207	0.11394	0.13534	0.14203	0.15766	0.22127	0.15486	0.10607	0.13472	0.16579	0.14995
Mn2+	0.00495	0.00931	0.00401	0.00474	0.00459	0.00856	0.00842	0.00765	0.00507	0.0039	0.00626	0.00521
Mg2+	0.81714	0.86687	0.83231	0.95042	0.8486	0.82212	0.83754	0.88649	0.89051	0.82094	0.78578	0.82189
Ca2+	0.85402	0.77611	0.86437	0.81781	0.85649	0.84488	0.80048	0.82968	0.84065	0.8706	0.83678	0.84903
Na1+	0.0186	0.02276	0.01879	0.00979	0.01884	0.0194	0.02462	0.01499	0.0192	0.01903	0.0214	0.02104
Mg#	80.795	80.3446	87.9584	87.5354	85.6626	83.9085	79.102	85.1289	89.3562	85.9028	82.5773	84.5706
Wo (%)	45.7824	41.8379	47.7387	42.962	46.3689	46.3034	43.0528	44.3436	45.7563	47.6711	46.7906	46.6277
En (%)	43.8051	46.7301	45.9682	49.9285	45.9418	45.056	45.0464	47.3796	48.4701	44.952	43.9389	45.1372
Fs (%)	10.4125	11.432	6.29311	7.10957	7.68931	8.6406	11.9008	8.27673	5.77358	7.37692	9.2705	8.23502
Supplementary1 Table 3. Continued
Unit 3	E51R2W61-25	E51R2W61-26	E51R2W61-27	E51R2W61-28	E51R2W61-29	E52R3W30-01	E52R3W30-02	E52R3W30-03	E52R3W30-04	E54R2W46-01	E54R2W46-02	E54R2W46-03
Depth (mbsf)	1321.76	1321.76	1321.76	1321.76	1321.76	1332.76	1332.76	1332.76	1332.76	1350.81	1350.81	1350.81
SiO2	51.3523	49.5494	50.9796	51.3217	50.8735	52.322	51.529	50.372	50.838	50.3057	52.7281	50.7625
TiO2	0.5737	0.7886	0.5891	0.6069	0.5195	0.345	0.55	0.588	0.533	0.4759	0.4325	0.5583
Al2O3	3.35	5.102	3.6294	3.6625	5.0135	2.325	2.681	3.768	3.7	4.4818	2.7873	3.4671
Cr2O3	0.0857	0.2022	0.5569	0.4466	0.606	0.505	0.38	0.231	0.192	0.3652	0.4351	0.1357
FeO	7.441	8.575	7.0482	7.6931	6.5126	6.507	6.449	7.472	7.671	5.4536	6.8417	9.2839
MnO	0.2109	0.2243	0.2087	0.2389	0.1508	0.211	0.231	0.198	0.253	0.0587	0.1584	0.2254
MgO	15.8342	14.2658	16.7661	16.2942	15.4774	17.01	15.617	14.851	15.069	15.7144	17.215	15.7034
CaO	21.5859	21.4293	20.0156	19.983	21.6403	20.493	21.646	21.545	21.316	22.8122	20.2042	19.9827
Na2O	0.2758	0.3121	0.2728	0.3024	0.2328	0.245	0.362	0.365	0.272	0.1934	0.3041	0.2943
Total	100.71	100.449	100.066	100.549	101.026	99.963	99.445	99.39	99.844	99.8609	101.106	100.413
Si4+	1.8764	1.82653	1.86771	1.87695	1.85098	1.91775	1.90551	1.86932	1.87919	1.84457	1.90975	1.86759
Al3+(tet)	0.1236	0.17347	0.13229	0.12305	0.14902	0.08225	0.09449	0.13068	0.12081	0.15543	0.09025	0.13241
Al3+(oct)	0.02068	0.04822	0.02443	0.03483	0.06599	0.0182	0.02237	0.03414	0.0404	0.03827	0.02874	0.01794
Ti4+	0.01577	0.02186	0.01623	0.01669	0.01422	0.00951	0.0153	0.01641	0.01482	0.01312	0.01178	0.01545
Cr3+	0.00248	0.00589	0.01613	0.01291	0.01743	0.01463	0.01111	0.00678	0.00561	0.01059	0.01246	0.00395
Fe3+	0.08846	0.09794	0.07865	0.06336	0.05359	0.04781	0.05637	0.0832	0.06466	0.09408	0.04684	0.10062
Fe2+	0.13893	0.16642	0.13731	0.17194	0.14458	0.15165	0.14308	0.1487	0.17248	0.07315	0.1604	0.18504
Mn2+	0.00653	0.007	0.00648	0.0074	0.00465	0.00655	0.00724	0.00622	0.00792	0.00182	0.00486	0.00702
Mg2+	0.86248	0.78393	0.91566	0.88833	0.83946	0.9294	0.86089	0.82156	0.83034	0.85894	0.92946	0.86124
Ca2+	0.84514	0.84643	0.78573	0.78308	0.84366	0.80484	0.85769	0.85671	0.84427	0.89627	0.7841	0.78775
Na1+	0.01954	0.02231	0.01938	0.02144	0.01642	0.01741	0.02596	0.02626	0.0195	0.01375	0.02136	0.02099
Mg#	86.1266	82.4885	86.9596	83.7832	85.307	85.972	85.7486	84.6742	82.8005	92.1517	85.2825	82.3143
Wo (%)	45.7686	47.1083	42.733	42.4813	46.1597	42.6768	46.0714	46.8923	45.7081	49.0202	41.8418	42.9519
En (%)	46.7077	43.6296	49.7992	48.191	45.9296	49.2818	46.2431	44.9683	44.9539	46.9787	49.5988	46.9588
Fs (%)	7.52373	9.26214	7.46782	9.32771	7.91074	8.0414	7.68547	8.13938	9.33807	4.00105	8.55942	10.0894
Supplementary1 Table 3. Continued
Unit 3	E54R2W46-04	E54R2W46-05	E54R2W46-06	E54R2W46-07	E54R2W46-08	E54R2W46-09	E54R2W46-10	E54R2W46-11	E54R2W46-12	E54R2W46-13	E54R2W46-14
Depth (mbsf)	1350.81	1350.81	1350.81	1350.81	1350.81	1350.81	1350.81	1350.81	1350.81	1350.81	1350.81
SiO2	52.6034	51.5971	52.7207	52.1645	51.5511	51.0235	50.9297	49.5228	51.4265	51.1272	49.621
TiO2	0.2692	0.5325	0.3771	0.5527	0.6412	0.6022	0.7128	0.6653	0.6128	0.4904	0.6778
Al2O3	2.7321	2.9467	2.5239	2.8063	2.8313	4.5507	3.7304	5.6555	3.7125	3.331	4.2455
Cr2O3	0.544	0.0825	0.4085	0.2723	0.0041	0.393	0.072	0.1436	0.0512	0.206	0.2087
FeO	4.1206	9.2415	5.8206	8.7507	9.9318	6.0933	7.3376	7.0935	7.9533	7.4238	7.835
MnO	0.0603	0.2616	0.1546	0.2139	0.2497	0.1395	0.1168	0.0643	0.2206	0.1837	0.1653
MgO	16.9337	16.5963	17.0954	16.3947	15.7424	15.6274	15.43	14.4584	15.1817	16.6353	15.0698
CaO	23.7522	18.9484	22.2751	19.7801	19.4939	22.6708	22.6369	22.5807	22.0614	20.6689	21.3662
Na2O	0.1887	0.2804	0.1365	0.2466	0.3209	0.3041	0.2339	0.2061	0.2855	0.2294	0.2448
Total	101.204	100.487	101.512	101.182	100.766	101.404	101.2	100.39	101.505	100.296	99.4341
Si4+	1.8954	1.89219	1.90125	1.90182	1.89406	1.8463	1.85425	1.81839	1.87063	1.87041	1.84079
Al3+(tet)	0.1046	0.10781	0.09875	0.09818	0.10594	0.1537	0.14575	0.18161	0.12937	0.12959	0.15921
Al3+(oct)	0.01143	0.01957	0.00854	0.02241	0.01668	0.04039	0.01434	0.06316	0.02981	0.01404	0.02642
Ti4+	0.00729	0.01469	0.01023	0.01515	0.01772	0.01639	0.01952	0.01837	0.01676	0.01349	0.01891
Cr3+	0.0155	0.00239	0.01165	0.00785	0.000119105	0.01124	0.00207	0.00417	0.00147	0.00596	0.00612
Fe3+	0.07627	0.07641	0.06765	0.05504	0.07656	0.09063	0.10682	0.09222	0.0847	0.09888	0.10646
Fe2+	0.0479	0.20702	0.1079	0.21177	0.22862	0.09377	0.11661	0.12561	0.15725	0.12825	0.13662
Mn2+	0.00184	0.00813	0.00472	0.00661	0.00777	0.00428	0.0036	0.002	0.0068	0.00569	0.00519
Mg2+	0.90955	0.90728	0.91903	0.89102	0.86222	0.84296	0.83744	0.79139	0.82321	0.9072	0.83336
Ca2+	0.91703	0.74457	0.86074	0.77271	0.76745	0.87901	0.8831	0.88841	0.85986	0.81021	0.8493
Na1+	0.01318	0.01994	0.00954	0.01743	0.02286	0.02134	0.01651	0.01467	0.02014	0.01627	0.01761
Mg#	94.9972	81.4212	89.4928	80.7967	79.0418	89.9899	87.7777	86.3018	83.9614	87.6139	85.9149
Wo (%)	48.9218	40.055	45.5981	41.2002	41.2987	48.4105	48.0691	49.2081	46.7234	43.8979	46.683
En (%)	48.5228	48.8079	48.6857	47.5083	46.3985	46.4253	45.5838	43.8344	44.7318	49.1532	45.8072
Fs (%)	2.55536	11.1371	5.71614	11.2915	12.3027	5.16417	6.34715	6.95757	8.54483	6.94888	7.50977
Mg# = 100*Mg/(Mg+Fe2+), mbsf for depth and wt. % for major elements. Cation abundances are calculated based on stoichiometry with 6 oxygen anions. Wo: Wollastonite (Ca2Si2O6), En: Enstatite (Mg2Si2O6), Fs: Ferrosilite (Fe2Si2O6).

## Sheet: Sheet4
Supplementary1 Table3. Major elements results of clinopyroxene in unit 3. (wt. %)	Unit 3	Depth (mbsf)	SiO2	TiO2	Al2O3	Cr2O3	FeO	MnO	MgO	CaO	Na2O	Total	Si4+	Al3+(tet)	Al3+(oct)	Ti4+	Cr3+	Fe3+	Fe2+	Mn2+	Mg2+	Ca2+	Na1+	Mg/(Mg+Fe2+)	Wo (%)	En (%)	Fs (%)
	D15R1W95_01	336.15	51.1527	0.3216	2.9195	0.0137	9.6391	0.2489	16.0068	19.7007	0.2161	100.219	1.88566	0.11434	0.01252	0.00892	0.000399305	0.09903	0.19814	0.00777	0.87961	0.77817	0.01545	81.6153	41.9289	47.3949	10.6762
	D27R2W122_01	454.21	52.6811	0.1428	2.2746	0.4889	3.3147	0.035	17.3418	24.1049	0.1316	100.515	1.9054	0.0946	0.00238	0.00388	0.01398	0.0797	0.02057	0.00107	0.93501	0.93418	0.00923	97.8478	49.434	49.4777	1.08828
	D27R2W122_02	454.21	50.6547	0.4126	4.5836	0.4466	5.5716	0.1178	15.5838	23.1363	0.2013	100.708	1.8438	0.1562	0.04045	0.01129	0.01285	0.09451	0.0751	0.00363	0.84558	0.90236	0.01421	91.8431	49.4976	46.383	4.1194
	D27R2W122_03	454.21	47.3227	0.6919	4.5979	0.537	5.8175	0.1134	15.0391	22.3269	0.2531	96.6995	1.79454	0.20546	5.73385e-05	0.01973	0.0161	0.16845	0.01605	0.00364	0.85015	0.90721	0.01861	98.1467	51.1561	47.9387	0.90525
	D27R2W122_04	454.21	47.4015	0.6074	6.0193	0.2014	6.4013	0.0855	14.5202	23.3467	0.2057	98.789	1.76216	0.23784	0.02592	0.01698	0.00592	0.18687	0.01215	0.00269	0.80467	0.92998	0.01483	98.5125	53.2392	46.0652	0.69559
	D35R4W34_01	534.04	52.5854	0.4417	2.6498	0.0323	10.8329	0.2744	15.8629	19.1066	0.2234	102.009	1.91374	0.08626	0.0274	0.01209	0.000929412	0.04952	0.2802	0.00846	0.86058	0.74507	0.01576	75.438	39.5085	45.6336	14.8579
	D35R4W34_02	534.04	52.7134	0.3544	1.6312	0.0061	11.0852	0.336	14.7113	20.0609	0.2119	101.11	1.94695	0.05305	0.01797	0.00984	0.000178137	0.03039	0.31203	0.01051	0.80998	0.79392	0.01518	72.1902	41.438	42.276	16.286
	D35R4W34_03	534.04	51.3196	0.3788	2.1374	0.005	11.2866	0.3152	14.5698	19.5421	0.237	99.7915	1.91935	0.08065	0.01357	0.01065	0.000147853	0.06281	0.29021	0.00999	0.81229	0.78313	0.01719	73.6769	41.5314	43.0778	15.3908
	D35R4W34_04	534.04	51.1515	0.295	4.0526	0.1753	6.2845	0.1402	15.6947	22.759	0.1507	100.704	1.86449	0.13551	0.03861	0.00809	0.00505	0.08632	0.10526	0.00433	0.8528	0.88889	0.01065	89.0132	48.1277	46.1732	5.69913
	D35R4W34_05	534.04	52.2077	0.5726	2.3301	0.0017	9.9019	0.3462	15.2147	20.6024	0.3128	101.49	1.91021	0.08979	0.0107	0.01576	4.91796e-05	0.06971	0.23329	0.01073	0.82985	0.80772	0.02219	78.0567	43.1737	44.3567	12.4696
	D35R4W34_06	534.04	51.3615	0.2854	4.748	0.1535	5.2519	0.0696	15.9752	23.5298	0.1572	101.532	1.84959	0.15041	0.05113	0.00773	0.00437	0.09043	0.06774	0.00212	0.85758	0.90793	0.01098	92.6793	49.5256	46.7793	3.69508
	D35R4W34_07	534.04	47.8456	0.7517	8.6012	0.1694	7.6988	0.1236	13.4171	22.7015	0.1565	101.465	1.74213	0.25787	0.11128	0.02058	0.00488	0.1116	0.12284	0.00381	0.72826	0.8857	0.01105	85.5667	50.996	41.9311	7.07288
	D41R2W124_01	589.95	50.688	0.503	3.026	0.127	7.952	0.184	14.88	22.221	0.256	99.837	1.87685	0.12315	0.00892	0.01401	0.00372	0.10087	0.14538	0.00577	0.82133	0.88162	0.01838	84.9614	47.6984	44.4363	7.8653
	D41R2W124_02	589.95	50.752	0.399	3.687	0.072	6.542	0.144	15.067	23.122	0.213	99.998	1.86765	0.13235	0.02758	0.01104	0.00209	0.09578	0.10556	0.00449	0.82653	0.91172	0.0152	88.6749	49.4477	44.8274	5.7249
	D44R1W14_01	616.64	49.8716	0.5566	4.4775	0.1955	7.5958	0.1678	14.9003	22.1074	0.2827	100.155	1.83579	0.16421	0.03006	0.01541	0.00569	0.11782	0.11602	0.00523	0.81762	0.87197	0.02018	87.5738	48.2923	45.2824	6.4253
	D44R1W14_02	616.64	48.7334	0.7042	5.5056	0.015	9.9045	0.2847	13.9051	21.251	0.3482	100.652	1.79724	0.20276	0.03656	0.01953	0.00043738	0.1516	0.15388	0.00889	0.76444	0.83975	0.0249	83.2429	47.7655	43.4815	8.75297
	D44R1W14_03	616.64	51.6313	0.4593	2.5731	0.0246	8.0966	0.2828	15.9361	21.4388	0.2738	100.716	1.88955	0.11045	0.000545491	0.01264	0.000711818	0.10334	0.14447	0.00877	0.86939	0.8407	0.01943	85.7502	45.3312	46.8786	7.79016
	D45R4W41_01	631.06	50.905	0.454	2.387	0.09	10.133	0.273	14.875	20.079	0.288	99.484	1.90149	0.09851	0.00659	0.01275	0.00266	0.08461	0.23195	0.00864	0.82829	0.80366	0.02086	78.1229	43.1172	44.4386	12.4442
	D45R4W41_02	631.06	50.7	0.509	2.698	0.081	9.661	0.251	14.899	20.496	0.258	99.553	1.89019	0.10981	0.00875	0.01427	0.00239	0.08879	0.21244	0.00793	0.82802	0.81877	0.01865	79.5821	44.0379	44.5359	11.4262
	D45R4W41_03	631.06	51.618	0.344	2.289	0.043	9.548	0.247	16.092	19.348	0.219	99.748	1.91271	0.08729	0.01268	0.00959	0.00126	0.06992	0.22598	0.00775	0.88889	0.76821	0.01574	79.7304	40.7954	47.2041	12.0005
	D45R4W41_04	631.06	50.955	0.318	3.481	0.138	7.387	0.171	14.948	22.688	0.21	100.296	1.87456	0.12544	0.0255	0.0088	0.00401	0.09331	0.13397	0.00533	0.81976	0.89434	0.01498	85.9531	48.3932	44.3575	7.2493
	D45R4W41_05	631.06	50.885	0.306	3.498	0.082	6.365	0.129	15.222	23.022	0.181	99.69	1.87688	0.12312	0.02896	0.00849	0.00239	0.08774	0.1086	0.00403	0.83696	0.90988	0.01295	88.5147	49.0383	45.1086	5.85314
	D45R4W41_06	631.06	50.484	0.392	3.894	0.261	5.348	0.092	15.11	23.751	0.138	99.47	1.86345	0.13655	0.03287	0.01088	0.00762	0.08418	0.08091	0.00288	0.83141	0.93938	0.00988	91.1314	50.7305	44.9001	4.36945
	D49R7W44_01	673.97	48.986	0.822	4.048	0.019	10.132	0.221	13.696	21.82	0.276	100.02	1.82471	0.17529	0.00245	0.02303	0.000559584	0.14616	0.16948	0.00697	0.76051	0.87091	0.01993	81.7762	48.3596	42.2296	9.41086
	D49R7W44_02	673.97	49.833	0.641	3.509	0.009	9.463	0.27	14.124	21.573	0.285	99.707	1.85729	0.14271	0.01145	0.01797	0.000265213	0.11566	0.17931	0.00852	0.78471	0.86153	0.0206	81.3998	47.1928	42.9851	9.82205
	D49R7W44_03	673.97	50.762	0.419	3.371	0.694	5.52	0.118	15.695	22.965	0.252	99.796	1.86611	0.13389	0.01218	0.01158	0.02017	0.09632	0.07339	0.00367	0.8601	0.90461	0.01796	92.1381	49.2143	46.7931	3.9926
	D49R7W44_04	673.97	51.614	0.298	2.794	0.509	5.48	0.115	15.796	23.032	0.283	99.921	1.89428	0.10572	0.01515	0.00823	0.01477	0.07949	0.08872	0.00358	0.8642	0.90574	0.02014	90.6897	48.7309	46.496	4.77313
	D49R7W44_05	673.97	50.543	0.548	3.627	0.17	7.285	0.183	15.044	21.56	0.29	99.25	1.87714	0.12286	0.03591	0.01531	0.00499	0.07223	0.15405	0.00576	0.83289	0.85798	0.02088	84.3911	46.5051	45.1451	8.34979
	D57R4W56_01	747.05	50.704	0.475	3.118	0.327	7.019	0.16	15.229	22.448	0.209	99.689	1.87513	0.12487	0.01105	0.01321	0.00956	0.09282	0.12427	0.00501	0.83956	0.88953	0.01499	87.1067	47.9957	45.2993	6.705
	D57R4W56_02	747.05	50.876	0.557	3.24	0.344	8.249	0.234	15.497	20.405	0.343	99.745	1.88232	0.11768	0.02362	0.0155	0.01006	0.07761	0.17763	0.00733	0.85471	0.80893	0.02461	82.7935	43.9333	46.4194	9.64732
	D57R5W112_01	749.12	51.4813	0.6832	3.0999	0.1313	10.3157	0.3202	16.0047	18.6014	0.2608	100.898	1.89015	0.10985	0.0243	0.01886	0.00381	0.06258	0.25417	0.00996	0.87596	0.73179	0.01857	77.5094	39.3029	47.0459	13.6512
	D57R5W112_02	749.12	52.1057	0.6394	3.2253	0.4464	9.0871	0.2884	17.7254	17.5209	0.1733	101.212	1.89272	0.10728	0.03081	0.01747	0.01282	0.04092	0.23514	0.00887	0.95981	0.68195	0.01221	80.3223	36.3338	51.1382	12.5281
	D57R5W112_03	749.12	51.1856	0.5962	4.5816	0.6185	6.3959	0.1679	15.1997	22.0269	0.3194	101.092	1.86309	0.13691	0.05965	0.01632	0.0178	0.04936	0.14534	0.00518	0.82473	0.85908	0.02254	85.0174	46.9661	45.088	7.94585
	D57R5W112_04	749.12	51.6386	0.5226	2.6275	0.0164	9.8421	0.3632	16.0153	19.1763	0.2839	100.486	1.90106	0.09894	0.01507	0.01447	0.000477368	0.07472	0.22831	0.01133	0.87891	0.75645	0.02027	79.3801	40.5892	47.1603	12.2505
	D57R5W112_05	749.12	51.2648	0.6617	3.4843	0.04	9.0406	0.2681	15.4586	20.6122	0.3476	101.178	1.8728	0.1272	0.02284	0.01818	0.00116	0.09147	0.18475	0.0083	0.84185	0.80685	0.02462	82.0037	44.0073	45.9161	10.0766
	D57R5W112_06	749.12	50.3389	0.666	4.0706	0.0616	9.4716	0.2422	14.9469	19.5486	0.307	99.6534	1.87071	0.12929	0.04901	0.01861	0.00181	0.06336	0.23101	0.00762	0.82802	0.77842	0.02212	78.1865	42.3639	45.0637	12.5725
	D57R5W112_07	749.12	51.6032	0.5819	3.9856	0.7656	6.8726	0.1899	16.2664	20.4063	0.2667	100.938	1.87847	0.12153	0.04948	0.01593	0.02204	0.03698	0.17225	0.00586	0.88269	0.79595	0.01882	83.6717	43.0035	47.6899	9.30654
	D57R5W112_08	749.12	52.2782	0.5093	3.2197	0.589	7.4415	0.2174	16.3288	20.2884	0.2595	101.132	1.90253	0.09747	0.04064	0.01394	0.01695	0.03032	0.19617	0.0067	0.88584	0.79114	0.01831	81.8701	42.2359	47.2915	10.4726
	D57R5W112_09	749.12	52.302	0.4582	2.9494	0.2692	7.398	0.183	16.4739	20.5643	0.236	100.834	1.90661	0.09339	0.03334	0.01256	0.00776	0.04386	0.18169	0.00565	0.89522	0.80325	0.01668	83.1288	42.7226	47.614	9.66339
	D57R5W112_10	749.12	51.7399	0.4499	2.4951	0.0181	9.3769	0.3473	15.7348	19.2244	0.272	99.6584	1.9207	0.0793	0.02988	0.01256	0.000531253	0.04335	0.24777	0.01092	0.87073	0.76468	0.01958	77.8482	40.6058	46.2373	13.1569
	D58R3W120_01	756.56	50.835	0.427	2.508	0	10.058	0.35	14.815	20.391	0.277	99.661	1.89521	0.10479	0.00542	0.01197	0	0.09544	0.21816	0.01105	0.82335	0.81457	0.02002	79.0535	43.8864	44.3597	11.7539
	D58R3W120_02	756.56	52.048	0.48	2.419	0.231	6.54	0.178	16.298	21.698	0.24	100.132	1.90873	0.09127	0.01329	0.01324	0.0067	0.06187	0.13872	0.00553	0.89097	0.85262	0.01707	86.528	45.2964	47.334	7.36953
	D66R2W5_01	831.4	50.766	0.582	2.979	0.155	9.188	0.286	15.748	19.782	0.358	99.844	1.87796	0.12204	0.00785	0.01619	0.00453	0.10295	0.1813	0.00896	0.86842	0.78411	0.02568	82.7287	42.7581	47.3553	9.88661
	D66R2W5_02	831.4	51.503	0.45	2.788	0.067	6.17	0.164	16.009	22.517	0.254	99.922	1.89065	0.10935	0.01128	0.01242	0.00194	0.08936	0.10006	0.0051	0.87605	0.88569	0.01808	89.7491	47.5715	47.0539	5.37457
	D66R2W5_03	831.4	50.653	0.557	2.906	0.106	8.779	0.226	15.308	20.441	0.353	99.329	1.88439	0.11561	0.01182	0.01558	0.00312	0.09497	0.17817	0.00712	0.84893	0.81482	0.02546	82.6531	44.2375	46.0894	9.6731
	D66R2W5_04	831.4	51.232	0.55	2.676	0.49	7.702	0.198	15.7	20.773	0.311	99.632	1.8964	0.1036	0.01315	0.01531	0.01434	0.06781	0.17063	0.00621	0.86632	0.82391	0.02232	83.545	44.276	46.5548	9.16922
	D66R2W5_05	831.4	50.267	0.465	4.17	0.331	5.477	0.113	15.335	23.383	0.201	99.742	1.84849	0.15151	0.02923	0.01286	0.00962	0.10127	0.06717	0.00352	0.84063	0.92136	0.01433	92.6008	50.3704	45.9573	3.67232
	D66R2W5_06	831.4	50.452	0.448	3.981	0.478	5.94	0.157	15.353	22.361	0.228	99.398	1.8643	0.1357	0.03769	0.01245	0.01397	0.07548	0.10809	0.00491	0.84571	0.88537	0.01634	88.6674	48.1396	45.9833	5.87713
	D66R2W5_07	831.4	50.537	0.374	4.137	0.876	4.54	0.092	15.849	22.72	0.223	99.348	1.86029	0.13971	0.03978	0.01035	0.0255	0.06965	0.07012	0.00287	0.86968	0.89613	0.01592	92.5388	48.8107	47.37	3.81929
	D66R2W5_08	831.4	50.284	0.46	4.569	0.64	5.34	0.162	15.714	22.241	0.298	99.708	1.84599	0.15401	0.04369	0.0127	0.01858	0.08756	0.07639	0.00504	0.85995	0.87488	0.02121	91.8416	48.3031	47.4791	4.21776
	D66R2W5_09	831.4	51.2039	0.6915	3.7888	0.5655	7.9225	0.2168	15.481	20.0402	0.3126	100.223	1.88591	0.11409	0.05039	0.01915	0.01647	0.03125	0.21279	0.00676	0.84997	0.79089	0.02232	79.9778	42.6664	45.8541	11.4795
	D66R2W5_10	831.4	52.3867	0.51	2.3158	0.0064	9.461	0.3611	16.1889	18.8306	0.2844	100.345	1.9298	0.0702	0.03036	0.01413	0.000186406	0.03171	0.25977	0.01127	0.88899	0.74328	0.02031	77.3873	39.2845	46.9861	13.7294
	D66R2W5_11	831.4	50.8809	0.6045	4.2398	0.0594	7.402	0.1896	15.0139	21.7592	0.2626	100.412	1.86828	0.13172	0.05178	0.01669	0.00172	0.06353	0.16378	0.0059	0.82181	0.8561	0.0187	83.3829	46.4846	44.6226	8.89272
	D66R2W5_12	831.4	52.2417	0.5884	2.9663	0.1861	8.5099	0.2683	16.3409	20.023	0.291	101.416	1.89883	0.10117	0.02591	0.01608	0.00535	0.05825	0.20043	0.00826	0.88539	0.77982	0.02051	81.5411	41.7989	47.4578	10.7433
	D66R2W5_13	831.4	50.2789	0.6492	4.6828	0.0639	7.4022	0.1727	14.6591	22.3221	0.2312	100.462	1.84691	0.15309	0.04966	0.01793	0.00186	0.08217	0.14523	0.00537	0.80271	0.8786	0.01647	84.679	48.1018	43.9469	7.95132
	D66R2W5_14	831.4	51.9319	0.4823	3.8932	0.777	6.0934	0.1568	16.5025	20.3013	0.28	100.418	1.89493	0.10507	0.06237	0.01324	0.02242	0.01362	0.17233	0.00485	0.89763	0.79374	0.01981	83.8939	42.5894	48.164	9.24659
	D66R2W5_15	831.4	51.3309	0.5572	4.2682	0.4254	6.8939	0.1794	15.2132	21.7992	0.2794	100.947	1.87317	0.12683	0.05676	0.01529	0.01227	0.04698	0.16342	0.00555	0.82758	0.85238	0.01977	83.5095	46.2401	44.8946	8.86527
	D66R2W5_16	831.4	52.8739	0.3097	3.0263	0.5455	5.0285	0.1503	17.4145	20.9534	0.1849	100.487	1.91906	0.08094	0.04853	0.00845	0.01565	0.01286	0.13977	0.00462	0.94221	0.81488	0.01301	87.0817	42.9595	49.6719	7.36865
	D66R2W5_17	831.4	51.6317	0.3575	3.447	0.8936	4.7761	0.1357	17.1288	20.834	0.1886	99.393	1.89469	0.10531	0.04379	0.00987	0.02593	0.02927	0.1173	0.00422	0.937	0.8192	0.01342	88.8737	43.7255	50.0132	6.26125
	D66R2W5_18	831.4	51.7939	0.3836	2.9535	0.659	6.4343	0.2037	16.6046	20.6792	0.2939	100.006	1.89863	0.10137	0.02624	0.01058	0.0191	0.05577	0.14149	0.00633	0.90736	0.81225	0.02089	86.51	43.6435	48.754	7.60251
	D66R2W5_19	831.4	50.8509	0.5978	4.694	0.7956	5.7108	0.1331	15.4329	22.1212	0.2355	100.572	1.85729	0.14271	0.05937	0.01642	0.02298	0.04421	0.13023	0.00412	0.84027	0.86573	0.01668	86.5807	47.1472	45.7604	7.09249
	D66R2W5_20	831.4	51.3381	0.4547	4.7691	1.0845	4.701	0.1067	15.9729	22.6336	0.1718	101.232	1.8571	0.1429	0.06045	0.01237	0.03102	0.03874	0.10348	0.00327	0.86133	0.87729	0.01205	89.2744	47.6245	46.758	5.61759
	D72R5W72_01	894.3	51.0253	0.5921	3.3109	0.2779	8.584	0.2398	15.9694	19.8381	0.4039	100.241	1.87558	0.12442	0.01903	0.01637	0.00808	0.09337	0.17052	0.00747	0.87504	0.78135	0.02879	83.6911	42.7689	47.8974	9.33375
	D72R5W72_02	894.3	50.8409	0.5207	4.1421	1.1026	5.1792	0.1082	15.5386	23.1888	0.2274	100.849	1.8511	0.1489	0.02886	0.01426	0.03174	0.07583	0.08188	0.00334	0.84337	0.90467	0.01605	91.151	49.4378	46.088	4.47427
	D72R5W72_03	894.3	51.5873	0.4305	2.6844	0.0426	8.9899	0.2853	16.1208	20.4119	0.2915	100.844	1.88728	0.11272	0.00303	0.01184	0.00123	0.10544	0.16961	0.00884	0.87916	0.80015	0.02068	83.8274	43.2764	47.5499	9.17366
	D72R5W72_04	894.3	50.3742	0.6497	4.3784	0.6859	6.5117	0.1458	15.4076	22.3244	0.2468	100.725	1.84011	0.15989	0.02863	0.01785	0.01981	0.09324	0.10569	0.00451	0.839	0.87379	0.01748	88.8118	48.0507	46.1371	5.81221
	D72R5W72_05	894.3	50.4353	0.5467	4.1213	0.1508	6.7472	0.1613	14.9963	23.4938	0.2256	100.878	1.84122	0.15878	0.01857	0.01501	0.00435	0.12181	0.08419	0.00499	0.8161	0.91901	0.01597	90.6482	50.5142	44.858	4.62783
	D72R5W72_06	894.3	50.4709	0.5013	4.9247	0.6264	5.2324	0.0921	15.1721	23.6578	0.2389	100.917	1.83478	0.16522	0.0458	0.01371	0.018	0.09085	0.06823	0.00284	0.8222	0.92153	0.01684	92.337	50.8582	45.3761	3.76575
	D72R5W72_07	894.3	50.0326	0.5393	4.5039	0.5465	5.4261	0.1119	15.8413	22.7365	0.2372	99.9753	1.83188	0.16812	0.02625	0.01485	0.01582	0.11318	0.05297	0.00347	0.86462	0.89199	0.01684	94.2274	49.2929	47.78	2.92711
	D72R5W72_08	894.3	49.4746	0.8504	5.4048	0.3392	6.8071	0.1289	14.4744	23.5938	0.3082	101.381	1.7989	0.2011	0.03054	0.02325	0.00975	0.13602	0.07097	0.00397	0.78454	0.91922	0.02173	91.7041	51.7947	44.2062	3.99908
	D72R5W72_09	894.3	51.8662	0.4398	3.2094	0.4735	6.7687	0.1673	15.9533	22.1658	0.3056	101.35	1.88123	0.11877	0.01844	0.012	0.01358	0.08426	0.12107	0.00514	0.86257	0.86146	0.02149	87.6921	46.689	46.7495	6.56145
	D72R5W72_10	894.3	50.109	0.5056	4.6056	0.8796	5.1424	0.1145	15.6978	23.7174	0.21	100.982	1.81831	0.18169	0.0153	0.0138	0.02524	0.12834	0.02772	0.00352	0.84914	0.92217	0.01478	96.8388	51.2594	47.1998	1.5408
	D72R5W72_11	894.3	48.8309	1.0171	6.7505	0.1187	6.2031	0.099	14.1627	23.5721	0.2443	100.998	1.77952	0.22048	0.06949	0.02788	0.00342	0.10908	0.07998	0.00306	0.76939	0.92045	0.01726	90.5837	52.0083	43.4726	4.51903
	E8R5W16_01	911.8	51.8527	0.231	2.4198	0.401	5.7883	0.1583	17.0391	21.6456	0.2298	99.7656	1.8992	0.1008	0.00366	0.00636	0.01161	0.08912	0.08818	0.00491	0.93032	0.8495	0.01632	91.3418	45.4761	49.803	4.7208
	E8R5W16_02	911.8	52.7542	0.1419	2.128	0.4057	4.7789	0.1439	17.6051	22.2534	0.1281	100.339	1.9158	0.0842	0.00689	0.00388	0.01165	0.06693	0.07821	0.00443	0.95306	0.86593	0.00902	92.4157	45.6424	50.2349	4.12262
	E8R5W16_03	911.8	51.7152	0.3817	2.1427	0.0498	11.7775	0.3024	15.7653	18.427	0.2199	100.781	1.90927	0.09073	0.00251	0.0106	0.00145	0.08131	0.28233	0.00946	0.86764	0.72895	0.01574	75.4487	38.7961	46.1775	15.0264
	E8R5W16_04	911.8	50.8626	0.3184	3.3527	0.1236	8.6073	0.2455	17.0254	18.7305	0.272	99.538	1.87451	0.12549	0.02016	0.00883	0.0036	0.10352	0.16178	0.00766	0.93536	0.73966	0.01944	85.2542	40.2691	50.9231	8.8078
	E8R5W16_05	911.8	51.1398	0.4276	2.603	0.0461	10.9627	0.2805	15.1098	19.355	0.3193	100.244	1.89663	0.10337	0.01042	0.01193	0.00135	0.09071	0.24931	0.00881	0.83535	0.76915	0.02296	77.0147	41.49	45.0613	13.4487
	E8R5W16_06	911.8	52.9698	0.1504	1.9211	0.2809	4.4271	0.1074	17.5466	22.9274	0.1559	100.487	1.91939	0.08061	0.00144	0.0041	0.00805	0.07387	0.06029	0.0033	0.9478	0.89019	0.01095	94.0193	46.8946	49.9293	3.17608
	E8R5W16_07	911.8	51.7777	0.2821	2.5897	0.1386	8.2462	0.2619	17.6758	18.9022	0.1786	100.053	1.89628	0.10372	0.00807	0.00777	0.00401	0.08878	0.16379	0.00812	0.965	0.74176	0.01268	85.4896	39.6547	51.5889	8.75634
	E8R5W16_08	911.8	51.448	0.3568	3.0603	0.22	8.673	0.2602	16.7198	19.2996	0.1953	100.233	1.8888	0.1112	0.02123	0.00985	0.00639	0.07778	0.18851	0.00809	0.91504	0.75921	0.0139	82.9176	40.7572	49.1227	10.1201
	E8R5W16_09	911.8	50.6878	0.3678	2.9454	0.2135	7.7309	0.1678	15.6916	21.3927	0.2023	99.3998	1.87874	0.12126	0.00742	0.01025	0.00626	0.10162	0.13803	0.00527	0.867	0.84962	0.01454	86.2663	45.8102	46.7475	7.44227
	E8R5W16_10	911.8	51.8196	0.2914	2.3825	0.0572	9.6962	0.2924	16.6363	18.5929	0.2388	100.007	1.91156	0.08844	0.01515	0.00808	0.00167	0.07253	0.2266	0.00914	0.91483	0.73491	0.01708	80.1473	39.1672	48.7559	12.0769
	E8R5W16_11	911.8	51.7952	0.4179	2.03	0	10.7907	0.3217	14.6586	20.2804	0.2887	100.583	1.91939	0.08061	0.00806	0.01165	0	0.07001	0.26442	0.0101	0.80976	0.80527	0.02074	75.3843	42.8463	43.0849	14.0688
	E16R3W141_01	987.93	51.7006	0.3002	1.9017	0.0153	8.7872	0.2735	14.9536	20.3814	0.2326	98.5461	1.9447	0.0553	0.02901	0.00849	0.000455026	0.02582	0.25061	0.00871	0.83848	0.82146	0.01696	76.9889	42.9959	43.8868	13.1173
	E16R3W141_02	987.93	52.1302	0.1905	2.3292	0.4339	7.1246	0.1901	15.5726	21.1906	0.23	99.3917	1.93348	0.06652	0.03531	0.00531	0.01272	0.0244	0.1966	0.00597	0.861	0.84215	0.01654	81.4108	44.3296	45.3218	10.3487
	E16R3W141_03	987.93	53.3357	0.2615	1.5842	0.0153	9.4399	0.3446	14.3469	21.464	0.2701	101.062	1.96615	0.03385	0.03499	0.00725	0.000445942	0.00322	0.28781	0.01076	0.7884	0.84782	0.01931	73.2572	44.0649	40.9765	14.9586
	E16R3W141_04	987.93	52.5495	0.3575	1.6108	0.0005	9.8489	0.3034	14.6019	20.4021	0.2502	99.9248	1.95853	0.04147	0.02929	0.01002	1.4734e-05	0.0102	0.29679	0.00958	0.81126	0.81476	0.01808	73.2153	42.3735	42.1914	15.4351
	E16R3W141_05	987.93	52.329	0.2651	1.1629	0	12.7919	0.646	13.0827	20.1962	0.24	100.714	1.96076	0.03924	0.01212	0.00747	0	0.02962	0.37124	0.0205	0.73075	0.81086	0.01744	66.3117	42.3901	38.2021	19.4078
	E16R3W141_06	987.93	52.6731	0.3621	1.7636	0.0176	9.9132	0.299	14.3812	20.8398	0.2956	100.545	1.95224	0.04776	0.02929	0.01009	0.000515759	0.01901	0.28827	0.00939	0.79457	0.82762	0.02124	73.378	43.3206	41.5902	15.0892
	E16R3W141_07	987.93	51.4	0.3376	1.6842	0.014	9.6832	0.3139	14.2465	20.2201	0.2542	98.1537	1.95047	0.04953	0.0258	0.00963	0.000420043	0.02274	0.28457	0.01009	0.80589	0.82216	0.0187	73.9039	42.9861	42.1355	14.8784
	E16R3W141_08	987.93	52.4526	0.2822	1.6447	0.0123	9.5738	0.3124	14.4071	21.3925	0.2652	100.343	1.94634	0.05366	0.01827	0.00788	0.000360865	0.03836	0.25874	0.00982	0.79692	0.85056	0.01908	75.4901	44.6202	41.8063	13.5735
	E16R3W141_09	987.93	52.9794	0.3533	2.3908	0.0729	8.9097	0.2554	15.2036	20.8794	0.2473	101.292	1.93878	0.06122	0.04191	0.00972	0.00211	0.0153	0.25739	0.00792	0.82939	0.81872	0.01755	76.3165	42.9662	43.5262	13.5076
	E20R6W36_01	1029.99	52.43	0.22	1.95	0.31	6.453	0.19	17.002	20.904	0.214	99.673	1.92659	0.07341	0.01105	0.00608	0.00901	0.05643	0.14188	0.00591	0.93132	0.82306	0.01525	86.7797	43.4045	49.1135	7.48197
	E20R6W36_02	1029.99	52.493	0.153	1.887	0.259	5.817	0.183	17.311	20.911	0.185	99.199	1.93296	0.06704	0.01486	0.00424	0.00754	0.04938	0.12976	0.00571	0.95024	0.82507	0.01321	87.9852	43.3091	49.8795	6.8114
	E21R3W30_01	1035.16	53.045	0.178	1.977	0.331	4.555	0.136	17.063	22.8	0.168	100.253	1.93089	0.06911	0.01571	0.00487	0.00953	0.04599	0.09268	0.00419	0.92589	0.88929	0.01186	90.901	46.6119	48.5303	4.85781
	E21R3W30_02	1035.16	53.235	0.155	1.885	0.47	4.104	0.108	17.025	23.198	0.117	100.297	1.93702	0.06298	0.01787	0.00424	0.01352	0.03136	0.09353	0.00333	0.92345	0.90445	0.00825	90.8032	47.0716	48.0607	4.86773
	E21R3W30_03	1035.16	53.247	0.161	1.744	0.353	5.94	0.188	17.646	20.666	0.172	100.117	1.94311	0.05689	0.01813	0.00442	0.01019	0.03191	0.14937	0.00581	0.95993	0.80808	0.01217	86.5348	42.145	50.0646	7.79047
	E21R3W30_04	1035.16	52.001	0.269	2.298	0.223	6.7	0.177	16.411	21.131	0.186	99.396	1.92049	0.07951	0.02052	0.00747	0.00651	0.05086	0.15608	0.00554	0.90349	0.83621	0.01332	85.2695	44.1088	47.658	8.23318
	E21R3W30_05	1035.16	53.394	0.164	1.699	0.092	5.438	0.143	17.115	21.879	0.22	100.144	1.94789	0.05211	0.02094	0.0045	0.00265	0.03508	0.13083	0.00442	0.93076	0.85525	0.01556	87.676	44.6176	48.5569	6.82546
	E21R3W30_06	1035.16	53.427	0.131	1.843	0.674	3.925	0.106	16.961	23.118	0.169	100.354	1.94305	0.05695	0.02206	0.00358	0.01938	0.02026	0.09913	0.00327	0.91953	0.90088	0.01192	90.2686	46.9323	47.9036	5.16401
	E21R3W30_07	1035.16	53.423	0.16	1.555	0.206	5.358	0.166	17.081	21.784	0.139	99.872	1.95627	0.04373	0.02339	0.00441	0.00596	0.01544	0.14865	0.00515	0.9324	0.85474	0.00987	86.2495	44.1544	48.1665	7.67902
	E21R3W30_08	1035.16	53.32	0.146	1.787	0.204	5.361	0.137	16.94	22.066	0.173	100.134	1.94725	0.05275	0.02418	0.00401	0.00589	0.02691	0.13683	0.00424	0.92222	0.86348	0.01225	87.0799	44.9136	47.9693	7.11705
	E21R3W30_09	1035.16	52.362	0.317	1.872	0.058	9.263	0.24	15.783	19.624	0.245	99.764	1.94234	0.05766	0.02419	0.00884	0.0017	0.03171	0.25566	0.00754	0.87275	0.77999	0.01762	77.3433	40.8716	45.7319	13.3965
	E21R3W30_10	1035.16	52.171	0.317	2.252	0.143	6.755	0.183	15.83	21.8	0.195	99.646	1.92662	0.07338	0.02465	0.0088	0.00418	0.04091	0.16772	0.00572	0.87144	0.86262	0.01396	83.86	45.3585	45.8225	8.81902
	E21R3W30_11	1035.16	53.02	0.17	2.032	0.305	5.683	0.176	17.273	21.229	0.154	100.042	1.93715	0.06285	0.02466	0.00467	0.00881	0.03095	0.1427	0.00545	0.94076	0.83109	0.01091	86.8292	43.409	49.1375	7.45353
	E21R3W30_12	1035.16	53.175	0.172	1.668	0.219	6.036	0.178	17.107	20.987	0.147	99.689	1.95287	0.04713	0.02508	0.00475	0.00636	0.01666	0.16873	0.00554	0.93655	0.82587	0.01047	84.7342	42.7656	48.4969	8.73749
	E21R3W30_13	1035.16	53.069	0.147	2.108	0.356	5.566	0.204	17.272	21.213	0.175	100.11	1.937	0.063	0.02769	0.00404	0.01027	0.02935	0.14056	0.00631	0.93977	0.82963	0.01239	86.9892	43.4372	49.2036	7.35923
	E21R3W30_14	1035.16	52.662	0.3	2.139	0.273	7.613	0.217	16.48	20.243	0.203	100.13	1.93564	0.06436	0.02831	0.00829	0.00793	0.02601	0.20802	0.00676	0.90297	0.79725	0.01447	81.2762	41.7795	47.3195	10.901
	E21R3W30_15	1035.16	53.262	0.168	1.746	0.259	5.759	0.17	17.354	20.855	0.127	99.7	1.95325	0.04675	0.02872	0.00463	0.00751	0.01028	0.16635	0.00528	0.9487	0.81949	0.00903	85.0814	42.3611	49.0401	8.59884
	E21R3W30_16	1035.16	53.684	0.142	1.698	0.155	4.961	0.145	17.123	22.19	0.14	100.238	1.95641	0.04359	0.02935	0.00389	0.00447	0.01188	0.13933	0.00448	0.93022	0.8665	0.00989	86.973	44.7561	48.0474	7.1965
	E21R3W30_17	1035.16	52.758	0.17	2.175	0.329	5.583	0.17	17.177	20.867	0.153	99.382	1.93991	0.06009	0.03418	0.0047	0.00956	0.01785	0.15384	0.00529	0.94152	0.82214	0.01091	85.9553	42.8758	49.1015	8.02269
	E26R2W104_01	1082.94	51.749	0.524	2.764	0.156	6.179	0.149	15.071	22.918	0.251	99.761	1.91083	0.08917	0.03113	0.01455	0.00455	0.04236	0.14845	0.00466	0.82957	0.90676	0.01797	84.8214	48.1095	44.014	7.8765
	E26R2W104_02	1082.94	51.009	0.416	3.635	0.563	6.482	0.19	15.845	21.223	0.3	99.663	1.8792	0.1208	0.03705	0.01153	0.0164	0.06573	0.13398	0.00593	0.87018	0.83778	0.02143	86.6575	45.4834	47.2425	7.27409
	E26R2W104_03	1082.94	51.083	0.414	3.496	0.073	5.984	0.158	14.686	23.588	0.227	99.709	1.8864	0.1136	0.03857	0.0115	0.00213	0.06615	0.11866	0.00494	0.80845	0.93335	0.01625	87.2011	50.1678	43.4543	6.37784
	E27R2-CPX-5	1092.63	51.719	0.216	2.307	0.064	6.792	0.215	16.751	21.3	0.148	99.512	1.90503	0.09497	0.00519	0.00598	0.00186	0.08651	0.12272	0.00671	0.91978	0.84067	0.01057	88.2283	44.6413	48.842	6.51664
	E27R5W5_01	1095.94	52.103	0.23	0.917	0	10.808	0.649	13.345	21.065	0.267	99.384	1.96749	0.03251	0.0083	0.00653	0	0.03069	0.31063	0.02076	0.7512	0.85233	0.01955	70.7458	44.5273	39.2445	16.2282
	E27R5W5_02	1095.94	52.016	0.38	1.877	0.085	9.497	0.25	16.307	18.913	0.243	99.568	1.93043	0.06957	0.01254	0.01061	0.00249	0.05081	0.24396	0.00786	0.90215	0.75209	0.01749	78.7141	39.6213	47.5267	12.852
	E27R5W5_03	1095.94	51.452	0.381	2.072	0.126	9.827	0.238	14.932	20.124	0.222	99.374	1.92428	0.07572	0.01562	0.01072	0.00373	0.05104	0.25634	0.00754	0.83248	0.80645	0.0161	76.4571	42.5506	43.9243	13.5251
	E27R5W5_04	1095.94	53.338	0.104	1.569	0.384	4.716	0.166	17.491	21.817	0.122	99.707	1.95125	0.04875	0.0189	0.00286	0.01111	0.02167	0.12261	0.00514	0.95385	0.85519	0.00865	88.6099	44.2726	49.3798	6.34758
	E27R5W5_05	1095.94	52.716	0.153	2.114	0.344	5.394	0.179	17.015	21.731	0.18	99.826	1.93	0.07	0.02123	0.00421	0.00996	0.04316	0.122	0.00555	0.92862	0.85249	0.01278	88.3878	44.7946	48.7948	6.41059
	E27R5W5_06	1095.94	53.111	0.161	1.632	0.107	6.968	0.258	17.037	20.516	0.113	99.903	1.95108	0.04892	0.02174	0.00445	0.00311	0.02322	0.19085	0.00803	0.93298	0.80756	0.00805	83.0179	41.8124	48.3059	9.88168
	E27R5W5_07	1095.94	53.03	0.197	1.704	0.193	6.181	0.148	17.436	20.445	0.153	99.487	1.94911	0.05089	0.02293	0.00545	0.00561	0.02237	0.16763	0.00461	0.95532	0.80518	0.0109	85.0724	41.7597	49.5464	8.69384
	E27R5W5_08	1095.94	52.463	0.274	2.028	0.119	6.896	0.222	16.333	20.973	0.235	99.543	1.93618	0.06382	0.02439	0.0076	0.00347	0.03756	0.17528	0.00694	0.89856	0.82937	0.01682	83.6773	43.5773	47.2129	9.20978
	E27R5W5_09	1095.94	53.121	0.096	1.811	0.454	5.115	0.141	17.177	21.576	0.174	99.665	1.94679	0.05321	0.02502	0.00265	0.01316	0.02211	0.13466	0.00438	0.9384	0.84726	0.01236	87.4508	44.1207	48.8668	7.01252
	E27R5W5_10	1095.94	51.983	0.209	2.436	0.468	5.458	0.133	16.661	21.505	0.162	99.015	1.92081	0.07919	0.02691	0.00581	0.01367	0.0386	0.13007	0.00416	0.91773	0.85145	0.01161	87.5864	44.8308	48.3207	6.84847
	E28R6W127_01	1108.01	52.0497	0.484	2.0608	0.0098	11.7386	0.3124	15.5358	17.9013	0.2797	100.372	1.93107	0.06893	0.02119	0.0135	0.000287471	0.04057	0.32366	0.00982	0.85922	0.71164	0.02012	72.6379	37.563	45.3529	17.0841
	E28R6W127_02	1108.01	52.5907	0.3046	2.2965	0.2719	8.462	0.2581	17.8099	17.842	0.2463	100.082	1.92672	0.07328	0.02589	0.00839	0.00788	0.04022	0.21905	0.00801	0.97266	0.7004	0.0175	81.6189	37.017	51.4061	11.577
	E28R6W127_03	1108.01	52.6287	0.2514	3.7313	0.1414	5.7305	0.1356	16.2261	21.9852	0.174	101.004	1.90826	0.09174	0.06773	0.00686	0.00405	0.01849	0.15529	0.00416	0.87704	0.85416	0.01223	84.9577	45.2779	46.4906	8.23147
	E28R6W127_04	1108.01	52.6838	0.2524	1.7352	0.1961	8.4569	0.2242	17.3107	18.349	0.2091	99.4174	1.9475	0.0525	0.0231	0.00702	0.00573	0.02462	0.23683	0.00702	0.9539	0.72679	0.01499	80.1105	37.9024	49.7467	12.3509
	E28R6W127_05	1108.01	54.2947	0.129	1.3713	0.5395	4.1229	0.1157	18.3873	21.6665	0.133	100.76	1.95896	0.04104	0.01728	0.0035	0.01539	0.01067	0.11373	0.00354	0.98895	0.83763	0.0093	89.6857	43.1697	50.9687	5.86166
	E28R6W127_06	1108.01	53.3698	0.3212	2.1681	0.342	7.6697	0.2371	18.8159	17.7567	0.1838	100.864	1.93222	0.06778	0.02474	0.00875	0.00979	0.02867	0.20356	0.00727	1.01549	0.68884	0.0129	83.3017	36.1048	53.2258	10.6694
	E28R6W127_07	1108.01	52.9905	0.2657	2.4886	0.2326	6.7928	0.185	17.8037	19.5559	0.1606	100.475	1.92779	0.07221	0.0345	0.00727	0.00669	0.02781	0.17887	0.0057	0.96552	0.76231	0.01133	84.3701	39.9808	50.6383	9.38096
	E28R6W127_08	1108.01	54.5973	0.1757	1.57	0.2125	6.6592	0.2022	18.7356	19.228	0.1386	101.519	1.96236	0.03764	0.02887	0.00475	0.00604	0.0029	0.19728	0.00616	1.00384	0.74052	0.00966	83.5756	38.1389	51.7008	10.1603
	E28R6W127_09	1108.01	51.0537	0.6759	4.6289	0.0983	7.6335	0.2034	15.4026	21.0171	0.264	100.977	1.86252	0.13748	0.06156	0.01854	0.00284	0.05467	0.17823	0.00629	0.83764	0.82156	0.01867	82.4557	44.7126	45.5876	9.6998
	E29R5W0_01	1115.41	51.9186	0.5005	3.1635	0.3549	7.776	0.2139	16.2651	20.4462	0.2655	100.904	1.89383	0.10617	0.02985	0.01373	0.01024	0.0574	0.17982	0.00661	0.88443	0.79914	0.01878	83.1037	42.8865	47.4635	9.65008
	E29R5W0_02	1115.41	52.818	0.329	2.2146	0.2534	5.9797	0.2002	17.5077	21.0353	0.248	100.586	1.91777	0.08223	0.01255	0.00898	0.00727	0.06191	0.11967	0.00616	0.94762	0.81838	0.01746	88.7871	43.4001	50.2535	6.34649
	E29R5W0_03	1115.41	51.4584	0.5086	1.8116	0.0058	13.2871	0.4105	13.7023	19.2856	0.2024	100.672	1.92505	0.07495	0.00493	0.01431	0.000171554	0.05592	0.3598	0.01301	0.76413	0.77306	0.01468	67.9877	40.752	40.2814	18.9667
	E29R5W0_04	1115.41	53.0041	0.1482	2.4708	0.656	5.0286	0.1383	17.6973	21.4343	0.146	100.724	1.91869	0.08131	0.02411	0.00403	0.01878	0.0406	0.11164	0.00424	0.95497	0.83138	0.01025	89.5336	43.8031	50.3151	5.88177
	E29R5W0_05	1115.41	51.9607	0.334	1.3559	0.0148	9.8427	0.375	14.4391	21.1324	0.287	99.7416	1.94073	0.05927	0.000417634	0.00938	0.000437058	0.06044	0.24701	0.01186	0.80393	0.84573	0.02079	76.4962	44.5902	42.3864	13.0234
	E29R5W0_06	1115.41	51.1345	0.4491	2.2292	0.0114	10.3908	0.2669	15.4037	19.2942	0.2348	99.4146	1.90949	0.09051	0.00761	0.01261	0.000336587	0.07433	0.25018	0.00844	0.85747	0.77201	0.017	77.4136	41.072	45.6183	13.3097
	E29R5W0_07	1115.41	52.9284	0.2022	2.0328	0.1294	6.5398	0.1911	17.907	20.2322	0.1285	100.291	1.92761	0.07239	0.01487	0.00554	0.00373	0.05179	0.14741	0.0059	0.97217	0.78953	0.00907	86.8338	41.356	50.9229	7.72116
	E29R5W0_08	1115.41	51.5976	0.3166	2.9478	0.2486	7.0283	0.1663	16.1407	21.3528	0.2077	100.006	1.89577	0.10423	0.02343	0.00875	0.00722	0.07088	0.14509	0.00518	0.88403	0.84063	0.0148	85.9019	44.9596	47.2808	7.75967
	E29R5W0_09	1115.41	50.8966	0.3625	2.6479	0.0065	9.4726	0.4192	15.0274	20.6548	0.3245	99.812	1.8897	0.1103	0.00558	0.01012	0.000190812	0.10765	0.18648	0.01318	0.83172	0.82171	0.02336	81.685	44.6603	45.2043	10.1355
	E29R5W0_10	1115.41	52.693	0.1265	1.9029	0.4447	5.6513	0.1716	18.2167	20.5355	0.1216	99.8638	1.92223	0.07777	0.00405	0.00347	0.01283	0.06255	0.10987	0.0053	0.99063	0.8027	0.0086	90.0165	42.1763	52.0509	5.7728
	E29R5W0_11	1115.41	53.8477	0.1111	1.2454	0.3253	4.2036	0.1315	18.3748	22.1478	0.0889	100.476	1.94785	0.05215	0.000955172	0.00302	0.0093	0.04208	0.08509	0.00403	0.99084	0.85845	0.00624	92.0912	44.3785	51.2225	4.399
	E29R5W0_12	1115.41	52.8713	0.2577	1.771	0.1095	9.0084	0.2377	16.8912	19.5962	0.1869	100.93	1.93113	0.06887	0.00737	0.00708	0.00316	0.05742	0.21776	0.00735	0.91969	0.76693	0.01324	80.8556	40.2721	48.2934	11.4346
	E29R5W0_13	1115.41	54.5948	0.1347	1.5982	0.4403	4.7547	0.1365	18.2447	22	0.0972	102.001	1.95018	0.04982	0.01747	0.00362	0.01244	0.01941	0.12263	0.00413	0.97151	0.84205	0.00673	88.7918	43.49	50.1763	6.33373
	E29R5W0_14	1115.41	53.1235	0.3642	2.9034	0.0782	7.339	0.1873	16.2698	21.6962	0.2192	102.181	1.91257	0.08743	0.03578	0.00986	0.00223	0.045	0.17597	0.00571	0.87318	0.83697	0.0153	83.2273	44.3752	46.295	9.32979
	E29R5W0_15	1115.41	52.6464	0.3524	2.0461	0.0011	12.7335	0.3756	15.7132	18.4835	0.1954	102.547	1.91617	0.08383	0.00395	0.00965	3.16553e-05	0.07435	0.31326	0.01158	0.85255	0.72085	0.01379	73.1295	38.2077	45.1884	16.6039
	E29R5W0_16	1115.41	51.7105	0.4054	2.1857	0.0075	9.2035	0.4768	14.6465	21.5129	0.3012	100.45	1.91224	0.08776	0.00751	0.01127	0.000219287	0.07908	0.20556	0.01494	0.8074	0.85243	0.0216	79.7068	45.6971	43.2831	11.0198
	E29R5W0_17	1115.41	53.4979	0.2137	1.7715	0.0965	8.2524	0.2461	17.9522	18.709	0.1673	100.907	1.94422	0.05578	0.0201	0.00584	0.00277	0.03301	0.21781	0.00758	0.97256	0.72854	0.01179	81.7024	37.9664	50.683	11.3506
	E29R5W0_18	1115.41	53.4205	0.1064	1.9899	0.4743	5.6358	0.1628	17.8561	21.1268	0.1469	100.919	1.9318	0.0682	0.01662	0.00289	0.01356	0.04252	0.12792	0.00499	0.96257	0.81862	0.0103	88.2694	42.8797	50.4197	6.70057
	E29R5W15_01	1115.56	54.346	0.107	0.853	0.186	4.146	0.177	18.069	22.47	0.141	100.495	1.9676	0.0324	0.004	0.00291	0.00532	0.02715	0.09839	0.00543	0.9752	0.8717	0.0099	90.8354	44.8108	50.1313	5.05794
	E29R5W15_02	1115.56	52.409	0.264	1.507	0	8.831	0.534	14.305	22.014	0.316	100.18	1.94563	0.05437	0.01157	0.00737	0	0.0508	0.22338	0.01679	0.79165	0.87568	0.02275	77.9928	46.315	41.8703	11.8148
	E29R5W15_03	1115.56	52.002	0.33	1.915	0.049	9.256	0.276	15.526	20.176	0.246	99.776	1.93027	0.06973	0.01405	0.00921	0.00144	0.05352	0.23382	0.00868	0.85911	0.80247	0.01771	78.6061	42.3378	45.326	12.3362
	E29R5W15_04	1115.56	53.895	0.128	1.427	0.305	5.022	0.157	18.41	20.715	0.149	100.208	1.95668	0.04332	0.01775	0.00349	0.00876	0.02031	0.13217	0.00483	0.99636	0.80584	0.01049	88.2883	41.6592	51.5081	6.8327
	E29R5W15_05	1115.56	53.583	0.12	1.934	0.198	5.12	0.169	17.284	22.562	0.105	101.075	1.93653	0.06347	0.01891	0.00326	0.00566	0.03974	0.11501	0.00517	0.93117	0.87371	0.00736	89.0067	45.5082	48.5011	5.99063
	E29R5W15_06	1115.56	53.346	0.152	1.747	0.534	4.087	0.121	16.487	23.702	0.155	100.331	1.94451	0.05549	0.01957	0.00417	0.01539	0.02316	0.10144	0.00374	0.89586	0.92574	0.01096	89.8285	48.1395	46.5858	5.27476
	E29R5W15_07	1115.56	53.168	0.182	1.766	0.395	6.254	0.144	17.298	20.695	0.206	100.108	1.94378	0.05622	0.01988	0.005	0.01142	0.02951	0.16171	0.00446	0.94272	0.81069	0.0146	85.3581	42.3312	49.2251	8.4437
	E29R5W15_08	1115.56	52.183	0.437	2.002	0	8.564	0.268	15.009	21.287	0.275	100.025	1.93312	0.06688	0.02053	0.01217	0	0.04175	0.22357	0.00841	0.82884	0.84496	0.01975	78.7564	44.5333	43.6835	11.7833
	E29R5W15_09	1115.56	51.487	0.4	2.596	0.005	8.607	0.359	14.588	21.631	0.273	99.946	1.91033	0.08967	0.02386	0.01116	0.00014668	0.06297	0.20411	0.01128	0.80686	0.85997	0.01964	79.8105	45.9647	43.126	10.9093
	E29R5W15_10	1115.56	51.357	0.369	3.271	0.359	5.824	0.148	15.343	23.243	0.213	100.127	1.88536	0.11464	0.0269	0.01019	0.01042	0.07211	0.1067	0.0046	0.83964	0.91428	0.01516	88.725	49.1386	45.127	5.7344
	E29R5W15_11	1115.56	51.95	0.373	2.351	0.064	8.675	0.304	15.669	20.188	0.195	99.769	1.92528	0.07472	0.02798	0.0104	0.00188	0.03808	0.23079	0.00954	0.86564	0.80167	0.01401	78.9508	42.2353	45.6056	12.1592
	E29R5W15_12	1115.56	53.164	0.176	2.003	0.378	4.441	0.091	16.335	23.428	0.158	100.174	1.94193	0.05807	0.02817	0.00483	0.01092	0.0205	0.11516	0.00282	0.88946	0.91695	0.01119	88.537	47.7188	46.288	5.99316
	E29R5W15_13	1115.56	51.749	0.326	3.136	0.383	6.038	0.199	15.529	22.792	0.21	100.362	1.89575	0.10425	0.03116	0.00898	0.01109	0.05895	0.12604	0.00618	0.84803	0.89465	0.01492	87.0605	47.8752	45.3803	6.74449
	E29R5W15_14	1115.56	52.907	0.206	1.896	0.016	8.275	0.238	15.862	20.642	0.172	100.214	1.94998	0.05002	0.03234	0.00571	0.000466256	0.01809	0.23698	0.00743	0.87149	0.8152	0.01229	78.621	42.3771	45.3036	12.3193
	E29R5W15_15	1115.56	51.368	0.313	3.43	0.348	6.06	0.153	15.225	23.094	0.223	100.214	1.88519	0.11481	0.03356	0.00864	0.0101	0.06974	0.11626	0.00476	0.83293	0.90815	0.01587	87.7517	48.8951	44.8455	6.25936
	E29R6W66_01	1117.57	52.174	0.265	1.816	0.22	6.633	0.203	17.136	20.594	0.182	99.223	1.92575	0.07425	0.00476	0.00736	0.00642	0.06138	0.14337	0.00635	0.94286	0.81448	0.01303	86.8011	42.8514	49.6054	7.54315
	E29R6W66_02	1117.57	53.051	0.199	1.734	0.363	5.867	0.17	16.944	21.674	0.163	100.165	1.94005	0.05995	0.0148	0.00547	0.0105	0.03527	0.14417	0.00527	0.92369	0.84928	0.01156	86.4992	44.2995	48.1804	7.52009
	E29R6W66_03	1117.57	52.774	0.188	1.879	0.205	5.197	0.156	16.516	22.911	0.117	99.943	1.93369	0.06631	0.01485	0.00518	0.00594	0.04347	0.11578	0.00484	0.90212	0.89951	0.00831	88.6256	46.9128	47.0487	6.03849
	E29R6W66_04	1117.57	54.027	0.052	1.176	0.576	3.848	0.117	17.363	22.929	0.166	100.254	1.96465	0.03535	0.01505	0.00142	0.01656	0.0126	0.10443	0.0036	0.94121	0.89341	0.0117	90.0128	46.0747	48.5397	5.38553
	E29R6W66_05	1117.57	52.961	0.239	1.663	0.134	7.312	0.194	17.151	20.07	0.146	99.87	1.94635	0.05365	0.01839	0.00661	0.00389	0.02856	0.19618	0.00604	0.9396	0.79033	0.0104	82.7273	41.0323	48.7824	10.1854
	E29R6W66_06	1117.57	52.136	0.305	1.963	0.03	9.158	0.281	15.394	20.505	0.188	99.96	1.93305	0.06695	0.01884	0.0085	0.000879457	0.04374	0.24023	0.00883	0.85084	0.81463	0.01352	77.9822	42.747	44.647	12.606
	E29R6W66_07	1117.57	52.453	0.22	2.173	0.185	5.481	0.129	16.334	22.635	0.166	99.776	1.92588	0.07412	0.01992	0.00607	0.00537	0.0485	0.1198	0.00401	0.89401	0.8905	0.01182	88.1832	46.7624	46.9466	6.29103
	E29R6W66_08	1117.57	53.5	0.141	1.847	0.4	4.98	0.182	16.933	22.656	0.137	100.776	1.94189	0.05811	0.02091	0.00385	0.01148	0.02767	0.1235	0.0056	0.91621	0.88115	0.00964	88.1217	45.8725	47.6978	6.42963
	E29R6W66_09	1117.57	53.099	0.154	1.776	0.541	6.191	0.18	17.648	20.022	0.189	99.8	1.94512	0.05488	0.02181	0.00424	0.01567	0.02234	0.16733	0.00559	0.96371	0.78589	0.01342	85.2057	40.9974	50.2735	8.72914
	E29R6W66_10	1117.57	53.003	0.174	1.746	0.19	6.974	0.211	17	20.437	0.167	99.902	1.94654	0.05346	0.02212	0.00481	0.00552	0.0281	0.1861	0.00656	0.93068	0.80422	0.01189	83.336	41.8646	48.4478	9.68753
	E29R6W66_11	1117.57	53.163	0.205	1.765	0.108	5.314	0.146	16.602	22.556	0.15	100.009	1.94631	0.05369	0.02247	0.00564	0.00313	0.02745	0.13525	0.00453	0.90605	0.88483	0.01065	87.0114	45.9381	47.0399	7.02196
	E29R6W66_12	1117.57	53.022	0.18	1.859	0.191	6.329	0.174	16.655	21.555	0.129	100.094	1.94373	0.05627	0.02405	0.00496	0.00554	0.02593	0.16811	0.0054	0.91015	0.84668	0.00917	84.4091	43.9848	47.2818	8.73337
	E29R6W66_13	1117.57	52.013	0.33	2.403	0.103	8.089	0.228	15.522	21.033	0.26	99.981	1.92084	0.07916	0.02544	0.00917	0.00301	0.05099	0.19884	0.00713	0.85451	0.83229	0.01862	81.1231	44.1384	45.3167	10.5449
	E29R6W66_14	1117.57	53.532	0.089	1.387	0.45	4.868	0.159	17.032	21.835	0.163	99.515	1.96633	0.03367	0.02638	0.00246	0.01307	0.000916964	0.14863	0.00495	0.9326	0.85939	0.01161	86.2536	44.2842	48.057	7.65873
	E29R6W66_15	1117.57	52.259	0.263	1.808	0.119	9.12	0.266	15.144	20.369	0.206	99.554	1.94752	0.05248	0.02694	0.00737	0.00351	0.02218	0.26206	0.0084	0.8413	0.81336	0.01489	76.2489	42.4351	43.8926	13.6723
	E29R6W66_16	1117.57	52.09	0.298	2.542	0.141	6.578	0.189	15.782	22.108	0.209	99.937	1.91677	0.08323	0.02703	0.00825	0.0041	0.05052	0.15192	0.00589	0.8657	0.87169	0.01491	85.071	46.1379	45.8211	8.04094
	E29R6W66_17	1117.57	53.09	0.242	2.24	0.416	5.457	0.151	16.128	22.808	0.229	100.761	1.93304	0.06696	0.02918	0.00663	0.01198	0.02872	0.13746	0.00466	0.87538	0.88984	0.01617	86.4283	46.7676	46.008	7.22439
	E29R6W66_18	1117.57	52.335	0.203	2.523	0.122	5.448	0.114	15.968	22.981	0.119	99.813	1.92286	0.07714	0.03212	0.00561	0.00354	0.03874	0.12866	0.00355	0.87457	0.90473	0.00848	87.1754	47.4185	45.8379	6.74357
	E34R4W90_01	1163.23	50.996	0.423	2.41	0.192	8.125	0.229	15.574	20.725	0.253	98.927	1.90267	0.09733	0.00866	0.01187	0.00566	0.07758	0.17595	0.00724	0.8662	0.82855	0.0183	83.1166	44.2908	46.3035	9.40575
	E34R4W90_02	1163.23	52.079	0.315	1.881	0.048	7.395	0.22	16.218	21.109	0.193	99.458	1.92688	0.07312	0.00891	0.00877	0.0014	0.05913	0.1697	0.00689	0.8945	0.83686	0.01385	84.0537	44.0209	47.0526	8.92656
	E34R4W90_03	1163.23	51.527	0.328	2.259	0.157	6.491	0.201	16.068	21.684	0.246	98.961	1.91153	0.08847	0.01031	0.00915	0.00461	0.07294	0.12845	0.00632	0.88858	0.86195	0.0177	87.3701	45.8732	47.2908	6.83599
	E34R4W90_04	1163.23	50.84	0.34	2.952	0.155	6.538	0.174	15.581	22.301	0.172	99.053	1.887	0.113	0.01615	0.00949	0.00455	0.08569	0.11726	0.00547	0.86209	0.88692	0.01238	88.0268	47.5239	46.1932	6.28287
	E34R4W90_05	1163.23	52.232	0.282	2.153	0.111	6.207	0.174	16.255	21.904	0.178	99.496	1.92641	0.07359	0.02	0.00782	0.00324	0.04744	0.14402	0.00544	0.89369	0.86562	0.01273	86.1214	45.4793	46.954	7.56666
	E34R4W90_06	1163.23	51.786	0.329	2.237	0.191	7.472	0.191	15.963	20.765	0.235	99.169	1.92275	0.07725	0.02064	0.00919	0.00561	0.04955	0.18247	0.00601	0.88351	0.82611	0.01692	82.8824	43.661	46.6952	9.64379
	E34R4W90_07	1163.23	52.185	0.227	2.507	0.385	5.25	0.114	16.046	22.937	0.184	99.835	1.91582	0.08418	0.0243	0.00627	0.01118	0.04927	0.11193	0.00355	0.87814	0.90228	0.0131	88.6947	47.6803	46.405	5.91469
	E34R4W90_08	1163.23	52.04	0.275	2.51	0.131	5.627	0.145	15.875	22.843	0.177	99.623	1.91637	0.08363	0.02532	0.00762	0.00381	0.05191	0.12139	0.00452	0.87145	0.90134	0.01264	87.7735	47.5846	46.0069	6.4085
	E34R4W90_09	1163.23	51.989	0.282	2.068	0.165	6.116	0.166	15.818	21.868	0.18	98.652	1.93654	0.06346	0.02734	0.0079	0.00486	0.02846	0.16207	0.00524	0.87833	0.87281	0.013	84.4223	45.6203	45.9087	8.471
	E34R4W90_10	1163.23	51.258	0.248	3.328	0.607	5.488	0.128	15.6	22.714	0.224	99.595	1.88843	0.11157	0.03295	0.00687	0.01768	0.0632	0.1059	0.00399	0.85675	0.89666	0.016	88.9991	48.2255	46.079	5.6955
	E34R4W90_11	1163.23	52.222	0.279	2.521	0.325	5.539	0.159	16.063	22.145	0.205	99.458	1.92526	0.07474	0.03481	0.00774	0.00947	0.02963	0.14115	0.00497	0.88278	0.8748	0.01465	86.2149	46.0728	46.4933	7.43387
	E34R4W90_12	1163.23	52.026	0.308	2.922	0.313	5.543	0.188	15.804	22.54	0.219	99.863	1.91132	0.08868	0.03785	0.00851	0.00909	0.04031	0.12999	0.00585	0.86551	0.88728	0.0156	86.9422	47.1261	45.9695	6.90432
	E35R5W84_01	1173.86	51.0801	0.6911	3.5066	0.1017	8.9683	0.2235	15.7077	20.6609	0.3128	101.253	1.86316	0.13684	0.01392	0.01896	0.00293	0.1042	0.16938	0.00691	0.85408	0.8075	0.02212	83.45	44.1023	46.6466	9.25108
	E35R5W84_02	1173.86	52.3613	0.2243	2.5671	0.1877	4.7137	0.1438	17.409	22.5399	0.1775	100.324	1.90032	0.09968	0.01014	0.00612	0.00539	0.0844	0.05867	0.00442	0.94185	0.87652	0.01249	94.1357	46.697	50.1772	3.12582
	E35R5W84_03	1173.86	52.1642	0.2164	2.448	0.1973	4.6345	0.0887	17.7593	22.2145	0.1416	99.8645	1.89911	0.10089	0.00416	0.00593	0.00568	0.08919	0.05192	0.00274	0.96381	0.86658	0.01	94.8888	46.0381	51.2038	2.75808
	E35R5W84_04	1173.86	52.3672	0.337	2.0241	0.0476	9.0184	0.3159	16.8509	19.3272	0.1906	100.479	1.92081	0.07919	0.00832	0.0093	0.00138	0.06445	0.2122	0.00981	0.92138	0.75961	0.01356	81.2807	40.1233	48.6683	11.2085
	E35R5W84_05	1173.86	53.0609	0.2685	1.9874	0.1057	8.3591	0.2736	17.3355	19.7308	0.2157	101.337	1.924	0.076	0.00895	0.00732	0.00303	0.06454	0.18895	0.0084	0.93704	0.7666	0.01517	83.2191	40.5055	49.5108	9.98371
	E35R5W84_06	1173.86	53.3832	0.1612	1.9378	0.6012	4.7588	0.1965	17.3741	22.2383	0.1828	100.834	1.93255	0.06745	0.01524	0.00439	0.01721	0.03905	0.10502	0.00603	0.9376	0.86263	0.01283	89.9269	45.2762	49.2114	5.51238
	E35R5W84_07	1173.86	52.3849	0.2296	2.4344	0.5022	5.0091	0.1803	17.0528	22.8888	0.1835	100.866	1.89684	0.10316	0.00073839	0.00625	0.01438	0.08842	0.06327	0.00553	0.92047	0.88806	0.01288	93.5688	47.4442	49.1758	3.37996
	E35R5W84_08	1173.86	52.8384	0.1681	2.2491	0.4027	5.0341	0.1447	17.1093	22.1312	0.1949	100.272	1.92379	0.07621	0.02031	0.0046	0.01159	0.04887	0.10442	0.00446	0.9286	0.86339	0.01376	89.8919	45.5276	48.9663	5.50614
	E35R5W84_09	1173.86	51.8895	0.3824	2.7217	0.1382	7.6337	0.2256	16.5036	20.9494	0.2425	100.687	1.89396	0.10604	0.01106	0.0105	0.00399	0.08716	0.14587	0.00697	0.89797	0.81933	0.01716	86.026	43.9752	48.1959	7.82892
	E35R5W84_10	1173.86	52.9262	0.1901	2.3178	0.2199	4.794	0.1244	17.3982	22.6291	0.1366	100.736	1.91523	0.08477	0.0141	0.00517	0.00629	0.06361	0.08147	0.00381	0.93852	0.87743	0.00958	92.0125	46.2432	49.463	4.2938
	E35R5W84_11	1173.86	52.4655	0.3598	2.4204	0.1012	8.6385	0.2901	17.5927	18.8647	0.237	100.97	1.90718	0.09282	0.01089	0.00984	0.00291	0.07606	0.18656	0.00893	0.95332	0.73479	0.01671	83.6331	39.1955	50.8527	9.95179
	E35R5W84_12	1173.86	53.4331	0.1512	1.9309	0.3857	4.4219	0.0963	17.7096	22.1299	0.1583	100.417	1.93727	0.06273	0.01979	0.00412	0.01106	0.03476	0.09932	0.00296	0.95715	0.85971	0.01113	90.5989	44.866	49.9508	5.18322
	E35R5W84_13	1173.86	53.0586	0.2919	2.214	0.3413	6.3473	0.141	17.9241	20.2454	0.2275	100.791	1.92173	0.07827	0.01625	0.00795	0.00977	0.05232	0.13995	0.00433	0.96775	0.7857	0.01598	87.3657	41.4968	51.1118	7.39146
	E35R5W84_14	1173.86	51.4256	0.2921	2.9992	0.8201	5.5152	0.1063	16.7174	22.3144	0.2188	100.409	1.87366	0.12634	0.00246	0.008	0.02362	0.0997	0.06836	0.00328	0.90797	0.87115	0.01546	92.9986	47.1535	49.1465	3.70001
	E35R5W84_15	1173.86	51.6568	0.4471	3.0579	0.155	8.0781	0.2781	16.216	20.4478	0.2478	100.585	1.89089	0.10911	0.02283	0.01231	0.00449	0.07476	0.17254	0.00862	0.88486	0.80201	0.01759	83.6829	43.1327	47.5882	9.27907
	E35R5W84_16	1173.86	50.4616	0.597	4.5275	0.1187	8.5257	0.2134	15.3335	20.5268	0.2302	100.534	1.85264	0.14736	0.04857	0.01648	0.00345	0.07876	0.18302	0.00664	0.83919	0.80751	0.01639	82.096	44.1329	45.8646	10.0024
	E35R5W84_17	1173.86	51.8448	0.3237	3.2382	0.2818	6.4735	0.2346	16.588	21.1699	0.2092	100.364	1.89288	0.10712	0.03223	0.00889	0.00813	0.06379	0.13388	0.00726	0.90282	0.82819	0.01481	87.0859	44.4096	48.4114	7.179
	E35R5W84_18	1173.86	50.3205	0.5164	4.2548	0.0519	8.2374	0.2018	15.4425	20.3151	0.2438	99.5842	1.86225	0.13775	0.04784	0.01437	0.00152	0.07714	0.17781	0.00633	0.85192	0.80557	0.01749	82.7325	43.8932	46.4185	9.68826
	E35R5W84_19	1173.86	51.503	0.4294	2.8675	0.3282	6.6859	0.189	16.0958	22.3511	0.239	100.689	1.87926	0.12074	0.00259	0.01178	0.00947	0.10202	0.10201	0.00584	0.8755	0.87387	0.01691	89.5642	47.201	47.289	5.51
	E35R5W84_20	1173.86	52.1395	0.2785	3.3658	0.5769	4.7172	0.1088	16.791	22.7273	0.1767	100.882	1.88681	0.11319	0.03037	0.00758	0.01651	0.06356	0.07921	0.00334	0.90579	0.88126	0.0124	91.9585	47.2206	48.5351	4.24427
	E35R5W84_21	1173.86	51.1819	0.4109	4.695	0.9363	5.2511	0.1017	16.2411	22.5207	0.2196	101.558	1.84422	0.15578	0.04362	0.01113	0.02667	0.07855	0.07969	0.0031	0.87237	0.86951	0.01534	91.6299	47.734	47.8913	4.37472
	E36R6W60_01	1184.41	51.578	0.324	1.973	0.054	10.212	0.359	15.403	19.339	0.211	99.453	1.92587	0.07413	0.0127	0.0091	0.00159	0.05692	0.26198	0.01135	0.85735	0.77373	0.01528	76.5949	40.872	45.289	13.839
	E36R6W60_02	1184.41	52.18	0.292	1.905	0.149	6.985	0.19	15.624	21.609	0.193	99.127	1.94006	0.05994	0.02354	0.00816	0.00438	0.02961	0.18759	0.00598	0.86595	0.86087	0.01391	82.1943	44.9681	45.2332	9.79876
	E36R6W60_03	1184.41	52.129	0.439	1.943	0.087	9.031	0.255	15.542	19.901	0.201	99.528	1.94024	0.05976	0.02548	0.01229	0.00256	0.02165	0.25947	0.00804	0.86233	0.79368	0.01451	76.8702	41.4351	45.019	13.5459
	E37R1W51_01	1187.71	50.749	0.41	2.323	0.036	9.109	0.319	14.711	21.01	0.309	98.976	1.90154	0.09846	0.00414	0.01155	0.00107	0.0926	0.19285	0.01012	0.82169	0.84353	0.02245	80.9914	45.398	44.223	10.3791
	E37R1W51_02	1187.71	51.634	0.363	1.981	0.129	8.502	0.289	16.137	19.804	0.229	99.068	1.92272	0.07728	0.00967	0.01017	0.0038	0.06002	0.20476	0.00912	0.89576	0.79018	0.01653	81.3942	41.7931	47.3772	10.8297
	E37R1W51_03	1187.71	50.69	0.374	2.563	0.039	8.579	0.219	14.84	21.473	0.152	98.929	1.89835	0.10165	0.01149	0.01053	0.00115	0.07898	0.18972	0.00695	0.82847	0.86167	0.01104	81.3669	45.8369	44.0709	10.0922
	E37R5W121_01	1193.82	51.8997	0.3932	2.598	0.2119	8.0639	0.2496	16.4875	20.0225	0.2491	100.175	1.9064	0.0936	0.01888	0.01086	0.00615	0.06458	0.18314	0.00777	0.9028	0.78806	0.01774	83.1351	42.0523	48.1749	9.77282
	E37R5W121_02	1193.82	52.1221	0.1618	2.0967	0.0509	7.5869	0.1876	16.8808	20.9354	0.1196	100.142	1.9112	0.0888	0.00182	0.00446	0.00148	0.08509	0.14757	0.00583	0.92271	0.82254	0.0085	86.2121	43.4559	48.7478	7.79627
	E37R5W121_03	1193.82	51.2863	0.3998	4.15	0.9185	4.9056	0.1603	16.4816	22.8286	0.2184	101.349	1.84988	0.15012	0.02631	0.01085	0.02619	0.0912	0.05678	0.0049	0.8862	0.8823	0.01527	93.9786	48.3378	48.5514	3.11081
	E37R5W121_04	1193.82	51.905	0.4472	2.7527	0.2086	8.8184	0.4616	16.5481	19.5871	0.2438	100.972	1.89529	0.10471	0.01376	0.01228	0.00602	0.07763	0.19166	0.01428	0.90075	0.76635	0.01726	82.455	41.2292	48.4594	10.3113
	E42R1W28_01	1226.25	51.88	0.32	1.762	0.039	12.599	0.449	14.731	18.149	0.203	100.132	1.94043	0.05957	0.01811	0.009	0.00115	0.03703	0.35708	0.01423	0.82133	0.72735	0.01472	69.6981	38.166	43.0974	18.7366
	E42R1W28_02	1226.25	52.565	0.34	1.315	0.02	11.93	0.579	13.585	19.919	0.246	100.499	1.96641	0.03359	0.0244	0.00957	0.000591557	0.00731	0.36593	0.01835	0.75758	0.79843	0.01784	67.4297	41.5431	39.4173	19.0396
	E42R1W28_03	1226.25	52.175	0.355	1.621	0.01	12.094	0.556	13.253	19.882	0.257	100.203	1.95955	0.04045	0.03131	0.01003	0.000296949	0.00751	0.37236	0.01769	0.74199	0.80011	0.01872	66.585	41.7929	38.7571	19.45
	E42R1W28_04	1226.25	52.837	0.149	2.596	0.347	5.752	0.247	17.296	19.94	0.26	99.424	1.93975	0.06025	0.05209	0.00411	0.01007	0.00837	0.16824	0.00768	0.94655	0.78438	0.01851	84.9084	41.3013	49.8402	8.85851
	E44R2W32_01	1256.6	50.509	0.344	2.158	0.081	12.299	0.331	14.396	18.681	0.247	99.046	1.90784	0.09216	0.00392	0.00977	0.00242	0.08436	0.30417	0.01059	0.8106	0.75608	0.01809	72.7146	40.4139	43.3279	16.2582
	E44R2W32_02	1256.6	51.422	0.358	2.005	0.058	12.095	0.267	14.688	18.762	0.231	99.886	1.92432	0.07568	0.01276	0.01008	0.00172	0.05782	0.32072	0.00846	0.81937	0.75232	0.01676	71.8689	39.7546	43.2978	16.9477
	E44R2W32_03	1256.6	52.17	0.347	1.297	0.043	10.599	0.672	13.733	20.543	0.238	99.642	1.96179	0.03821	0.01928	0.00981	0.00128	0.01538	0.31794	0.0214	0.76981	0.82773	0.01735	70.7709	43.2125	40.1889	16.5986
	E44R2W32_04	1256.6	52.139	0.356	1.828	0.034	12.196	0.362	14.23	19.147	0.231	100.523	1.94419	0.05581	0.02453	0.00998	0.001	0.02701	0.35333	0.01143	0.79099	0.76502	0.0167	69.1231	40.0672	41.4274	18.5054
	E44R2W32_05	1256.6	51.824	0.34	1.621	0.023	12.076	0.383	14.319	18.357	0.277	99.22	1.95591	0.04409	0.02802	0.00965	0.000686332	0.01635	0.36481	0.01224	0.8056	0.74236	0.02027	68.8306	38.8106	42.1169	19.0725
	E44R2W32_06	1256.6	51.315	0.545	2.923	0.046	8.262	0.25	14.855	21.462	0.264	99.922	1.90089	0.09911	0.02852	0.01518	0.00135	0.05784	0.19812	0.00784	0.8203	0.85188	0.01896	80.5463	45.5475	43.8594	10.5931
	E44R2W32_07	1256.6	52.797	0.306	2.387	0.261	7.443	0.283	16.687	20.2	0.232	100.596	1.92899	0.07101	0.03179	0.00841	0.00754	0.0313	0.19613	0.00876	0.90884	0.7908	0.01644	82.2502	41.7139	47.9406	10.3455
	E44R2W32_08	1256.6	52.832	0.156	2.066	0.598	3.568	0.043	16.524	23.21	0.144	99.141	1.94488	0.05512	0.03452	0.00432	0.01741	0.00484	0.10501	0.00134	0.90677	0.91551	0.01028	89.6213	47.5024	47.0491	5.44854
	E44R2W32_09	1256.6	52.07	0.536	2.536	0.046	8.295	0.261	15.266	20.772	0.286	100.068	1.92449	0.07551	0.03497	0.0149	0.00134	0.02989	0.22651	0.00817	0.84109	0.82262	0.0205	78.7832	43.5198	44.4969	11.9833
	E44R2W32_10	1256.6	52.27	0.354	2.529	0.234	6.906	0.227	16.052	20.637	0.265	99.474	1.9319	0.0681	0.04207	0.00984	0.00684	0.01851	0.19496	0.00711	0.8844	0.81728	0.01899	81.9374	43.0909	46.6298	10.2793
	E44R2W32_11	1256.6	51.139	0.617	3.424	0.407	7.218	0.302	15.439	20.717	0.226	99.489	1.89571	0.10429	0.04532	0.0172	0.01193	0.02888	0.1949	0.00948	0.85316	0.82289	0.01624	81.4037	43.9826	45.6004	10.417
	E44R2W32_12	1256.6	52.344	0.226	2.149	0.08	10.169	0.234	15.249	18.958	0.218	99.627	1.95166	0.04834	0.0461	0.00634	0.00236	0.00296	0.31413	0.00739	0.84756	0.7574	0.01576	72.9592	39.4666	44.1645	16.3689
	E44R2W32_13	1256.6	51.857	0.337	3.471	0.525	4.815	0.114	15.815	22.822	0.169	99.925	1.90131	0.09869	0.05132	0.00929	0.01522	0.02558	0.12206	0.00354	0.86438	0.89659	0.01201	87.6262	47.6141	45.9036	6.48234
	E44R2W32_14	1256.6	51.29	0.644	3.8	0.335	7.332	0.178	15.038	21.246	0.27	100.133	1.89076	0.10924	0.05587	0.01785	0.00976	0.0272	0.19885	0.00556	0.82639	0.83922	0.0193	80.6045	45.0114	44.3232	10.6654
	E44R2W32_15	1256.6	51.742	0.476	3.82	0.753	5.814	0.176	15.87	21.191	0.291	100.133	1.8964	0.1036	0.06143	0.01312	0.02182	0.01479	0.16342	0.00546	0.86707	0.83221	0.02068	84.1415	44.6777	46.5491	8.77324
	E44R3W11_01	1257.77	51.919	0.395	1.677	0.026	12.207	0.592	13.975	18.987	0.228	100.006	1.94922	0.05078	0.02343	0.01115	0.000771786	0.02087	0.36242	0.01883	0.78212	0.76381	0.0166	68.3349	40.0246	40.9843	18.9911
	E44R3W11_02	1257.77	51.702	0.391	1.758	0.015	12.653	0.349	14.004	18.641	0.239	99.752	1.94605	0.05395	0.02404	0.01107	0.000446402	0.02477	0.37353	0.01113	0.78576	0.75181	0.01744	67.7794	39.3392	41.1153	19.5455
	E44R3W11_03	1257.77	52.132	0.217	1.754	0.017	12.835	0.383	14.091	18.877	0.196	100.502	1.948	0.052	0.02526	0.0061	0.000502254	0.02824	0.37286	0.01212	0.7849	0.75581	0.0142	67.7947	39.4972	41.0176	19.4851
	E44R3W11_04	1257.77	52.008	0.239	1.46	0.018	10.74	0.465	13.815	20.172	0.213	99.13	1.96404	0.03596	0.02903	0.00679	0.000537455	0.00841	0.33079	0.01487	0.77772	0.81625	0.0156	70.159	42.4079	40.4058	17.1863
	E44R3W11_05	1257.77	51.904	0.47	2.055	0.307	6.447	0.244	16.816	19.655	0.196	98.094	1.93981	0.06019	0.03034	0.01321	0.00907	0.00856	0.19295	0.00772	0.93685	0.78709	0.0142	82.9218	41.0609	48.8735	10.0656
	E44R3W11_06	1257.77	51.555	0.358	1.692	0.03	12.254	0.319	13.681	18.878	0.229	98.996	1.95605	0.04395	0.03171	0.01022	0.000899949	0.00776	0.38107	0.01025	0.77378	0.76746	0.01685	67.0026	39.924	40.2523	19.8237
	E44R3W11_07	1257.77	51.612	0.581	2.044	0.055	12.304	0.414	14.252	18.074	0.284	99.62	1.94203	0.05797	0.03269	0.01644	0.00164	0.01148	0.37572	0.0132	0.79941	0.72871	0.02072	68.0274	38.2758	41.9896	19.7346
	E44R3W11_08	1257.77	51.945	0.299	1.749	0.01	10.489	0.519	13.872	20.089	0.211	99.183	1.95899	0.04101	0.03674	0.00848	0.000298179	0.00244	0.32839	0.01658	0.77986	0.81179	0.01543	70.3686	42.2798	40.6171	17.1032
	E44R3W11_09	1257.77	51.784	0.637	2.24	0.005	11.2	0.276	14.496	18.859	0.236	99.733	1.9398	0.0602	0.0387	0.01795	0.000148088	0.0026	0.34828	0.00876	0.80947	0.75696	0.01714	69.9175	39.5341	42.2763	18.1895
	E44R3W11_10	1257.77	52.363	0.531	2.148	0.073	9.875	0.288	16.578	17.301	0.292	99.449	1.94528	0.05472	0.03934	0.01484	0.00214	0.00459	0.30222	0.00906	0.91808	0.68869	0.02103	75.234	36.0762	48.0924	15.8314
	E44R3W11_11	1257.77	50.887	0.653	3.111	0.062	9.696	0.232	15.374	18.355	0.366	98.736	1.90776	0.09224	0.04523	0.01841	0.00184	0.03495	0.26906	0.00737	0.8592	0.73734	0.02661	76.1527	39.5229	46.055	14.4221
	E44R3W11_12	1257.77	49.677	0.839	4.222	0.259	8.191	0.233	14.95	20.008	0.241	98.62	1.8618	0.1382	0.04831	0.02365	0.00767	0.05243	0.20431	0.0074	0.83524	0.80348	0.01751	80.3463	43.5958	45.3187	11.0855
	E44R3W11_13	1257.77	49.813	0.851	4.429	0.524	7.436	0.283	15.271	19.789	0.262	98.658	1.86177	0.13823	0.05689	0.02392	0.01548	0.03701	0.19543	0.00896	0.85083	0.7925	0.01899	81.3211	43.1	46.2718	10.6282
	E44R3W11_14	1257.77	50.471	0.594	4.306	0.484	6.306	0.22	14.627	22.073	0.226	99.307	1.87398	0.12602	0.06243	0.01659	0.01421	0.03248	0.16334	0.00692	0.80959	0.87817	0.01627	83.2115	47.4403	43.7357	8.82397
	E44R6W54_01	1261.87	51.8029	0.322	2.9347	0.0246	8.8053	0.2311	15.6833	20.9332	0.1554	100.892	1.89765	0.10235	0.02436	0.00887	0.000712501	0.07057	0.19919	0.00717	0.85642	0.82166	0.01104	81.1304	43.7688	45.6206	10.6106
	E44R6W54_02	1261.87	53.2021	0.2887	1.1958	0.0033	10.5115	0.644	14.3953	20.5457	0.2403	101.027	1.96849	0.03151	0.02064	0.00803	9.65397e-05	0.01195	0.31332	0.02018	0.79399	0.81455	0.01724	71.7046	42.3836	41.3136	16.3028
	E44R6W54_03	1261.87	51.7731	0.2968	1.1421	0.0066	12.3436	0.7701	13.8562	19.1786	0.277	99.6441	1.95249	0.04751	0.00326	0.00842	0.000196796	0.04747	0.34184	0.0246	0.77897	0.77499	0.02026	69.5004	40.8794	41.0891	18.0315
	E44R6W54_04	1261.87	52.9162	0.2464	1.0786	0.0099	12.1475	0.8803	14.6687	18.9971	0.2317	101.176	1.96064	0.03936	0.00775	0.00687	0.000290023	0.03424	0.34218	0.02763	0.8102	0.75421	0.01665	70.3065	39.558	42.4946	17.9474
	E44R6W54_05	1261.87	51.057	0.4457	2.4038	0.001	13.4876	0.545	15.4376	16.435	0.2014	100.014	1.909	0.091	0.01494	0.01253	2.95624e-05	0.06556	0.35619	0.01726	0.86044	0.65844	0.0146	70.723	35.1154	45.8884	18.9963
	E44R6W54_06	1261.87	51.8485	0.5575	3.4739	0.084	7.8348	0.2875	15.6649	20.6648	0.2915	100.707	1.89775	0.10225	0.04762	0.01535	0.00243	0.04219	0.19764	0.00891	0.85471	0.81045	0.02069	81.2192	43.5071	45.883	10.6098
	E44R6W54_07	1261.87	51.7146	0.3081	2.8917	0.0555	9.8861	0.3334	16.1249	19.4968	0.2123	101.023	1.89277	0.10723	0.01752	0.00848	0.00161	0.08622	0.21639	0.01034	0.87977	0.76461	0.01507	80.2591	41.091	47.2798	11.6292
	E44R6W54_08	1261.87	50.866	0.3795	2.4513	0.026	11.404	0.4317	15.2183	18.2955	0.205	99.2773	1.90775	0.09225	0.01611	0.0107	0.000771001	0.06887	0.28883	0.01371	0.85084	0.73524	0.01491	74.6565	39.2147	45.3802	15.4051
	E44R6W54_09	1261.87	51.8816	0.4155	3.4427	0.4093	7.2698	0.2419	16.3716	19.9204	0.2799	100.233	1.90124	0.09876	0.04995	0.01145	0.01186	0.03394	0.18887	0.00751	0.89434	0.7822	0.01989	82.5643	41.9317	47.9436	10.1246
	E44R6W54_10	1261.87	51.6708	0.4504	2.0853	0.0033	13.0393	0.6717	14.1425	18.4035	0.2646	100.731	1.92696	0.07304	0.01862	0.01263	9.73037e-05	0.04819	0.35849	0.02122	0.78622	0.7354	0.01913	68.6828	39.1147	41.8177	19.0676
	E44R6W54_11	1261.87	52.8686	0.5066	3.0832	0.2109	9.4253	0.3656	16.7743	18.5662	0.3035	102.104	1.90981	0.09019	0.04109	0.01376	0.00602	0.03681	0.24794	0.01119	0.90329	0.71864	0.02126	78.4627	38.4325	48.3075	13.26
	E44R6W54_12	1261.87	51.7966	0.3998	3.0246	0.0281	9.4525	0.3529	15.6678	20.0186	0.2752	101.016	1.89682	0.10318	0.02737	0.01101	0.000813615	0.07252	0.21698	0.01095	0.85531	0.78551	0.01954	79.7646	42.2818	46.0387	11.6795
	E44R6W54_13	1261.87	50.9496	0.7344	4.8169	0.3357	7.4528	0.2307	14.7758	21.7363	0.3309	101.363	1.85555	0.14445	0.06233	0.02011	0.00967	0.05559	0.17141	0.00712	0.80218	0.84823	0.02337	82.3944	46.5594	44.032	9.40856
	E44R6W54_14	1261.87	50.4206	0.548	5.2907	0.7398	5.513	0.2052	15.3619	22.5857	0.224	100.889	1.83392	0.16608	0.06075	0.01499	0.02128	0.06987	0.09783	0.00632	0.83293	0.88024	0.0158	89.4894	48.6053	45.9928	5.40188
	E44R6W54_15	1261.87	50.9896	0.4854	3.448	0.1591	9.1076	0.2295	15.9718	19.0577	0.3738	99.8225	1.88309	0.11691	0.03319	0.01348	0.00465	0.07888	0.20242	0.00718	0.87929	0.75415	0.02677	81.2869	41.0786	47.8954	11.026
	E44R6W54_16	1261.87	52.66	0.2587	1.3406	0.0136	11.2521	0.6072	14.0757	20.2347	0.2761	100.719	1.95817	0.04183	0.01693	0.00723	0.00039985	0.02994	0.31999	0.01913	0.78024	0.80623	0.01991	70.9161	42.2894	40.9261	16.7845
	E44R6W54_17	1261.87	52.7946	0.2292	2.3843	0.1334	9.8636	0.2629	17.5897	17.3522	0.1697	100.78	1.92861	0.07139	0.03128	0.0063	0.00385	0.03569	0.26566	0.00813	0.95786	0.67921	0.01202	78.2873	35.6966	50.3414	13.962
	E44R6W54_18	1261.87	50.2921	0.7539	4.2639	0.0154	7.9854	0.2503	14.7328	20.8349	0.3079	99.4366	1.86836	0.13164	0.05507	0.02106	0.000452344	0.05618	0.19192	0.00788	0.8159	0.82936	0.02218	80.9565	45.1433	44.4101	10.4466
	E44R6W54_19	1261.87	51.1646	0.4464	2.6304	0.1213	10.9708	0.2878	14.9834	18.7885	0.275	99.6682	1.91061	0.08939	0.02639	0.01254	0.00358	0.05425	0.28837	0.0091	0.83407	0.75178	0.01991	74.3084	40.1114	44.5022	15.3863
	E45R2W80_01	1266.36	51.641	0.484	2.348	0.265	6.789	0.198	16.5	20.8	0.26	99.285	1.90882	0.09118	0.01112	0.01345	0.00774	0.06404	0.14583	0.0062	0.90917	0.82381	0.01863	86.1773	43.8476	48.3907	7.76169
	E45R2W80_02	1266.36	51.32	0.499	2.516	0.019	7.69	0.286	15.109	21.699	0.29	99.428	1.90629	0.09371	0.01645	0.01394	0.000558015	0.0697	0.16919	0.009	0.83662	0.86365	0.02089	83.1787	46.1977	44.752	9.05029
	E45R2W80_03	1266.36	51.638	0.433	2.623	0.076	7.085	0.245	15.186	22.176	0.313	99.775	1.90802	0.09198	0.02226	0.01203	0.00222	0.06586	0.15308	0.00767	0.83646	0.87799	0.02243	84.5302	47.0135	44.7897	8.19684
	E45R2W80_04	1266.36	49.861	0.66	4.233	0.238	8.137	0.199	15.158	20.862	0.386	99.734	1.84317	0.15683	0.02761	0.01835	0.00696	0.11323	0.13833	0.00623	0.83529	0.82633	0.02767	85.7922	45.9085	46.4061	7.68538
	E45R2W80_05	1266.36	50.217	0.503	3.883	0.265	6.972	0.181	15.167	21.837	0.281	99.306	1.86129	0.13871	0.03093	0.01402	0.00777	0.09216	0.12396	0.00568	0.83802	0.86726	0.0202	87.1141	47.4111	45.8123	6.77657
	E45R2W80_06	1266.36	50.101	0.552	4.668	0.123	6.335	0.136	14.626	22.925	0.247	99.713	1.84917	0.15083	0.05225	0.01532	0.00359	0.08202	0.11353	0.00425	0.80472	0.90664	0.01768	87.6363	49.6819	44.0971	6.22106
	E48R3W108_01	1295.64	51.417	0.374	1.918	0.041	11.227	0.35	14.67	19.702	0.281	99.98	1.91852	0.08148	0.00287	0.0105	0.00121	0.07674	0.27361	0.01106	0.81598	0.78771	0.02033	74.8887	41.9597	43.4658	14.5746
	E48R3W108_02	1295.64	51.723	0.302	1.755	0.05	10.363	0.335	15.036	20.061	0.195	99.82	1.92823	0.07177	0.00534	0.00847	0.00147	0.06212	0.26098	0.01058	0.8356	0.80135	0.0141	76.2006	42.2223	44.0268	13.7508
	E48R3W108_03	1295.64	52.409	0.241	1.532	0.115	9.55	0.289	16.194	19.481	0.169	99.98	1.93998	0.06002	0.00683	0.00671	0.00337	0.04854	0.24711	0.00906	0.89358	0.77268	0.01213	78.3368	40.383	46.7021	12.9149
	E48R3W108_04	1295.64	51.785	0.339	1.753	0.023	10.32	0.297	14.82	20.164	0.237	99.738	1.93292	0.06708	0.01004	0.00952	0.000678775	0.05448	0.26768	0.00939	0.82461	0.80646	0.01715	75.4937	42.4732	43.4292	14.0976
	E48R3W108_05	1295.64	51.606	0.29	1.945	0.094	10.016	0.224	15.305	19.818	0.228	99.526	1.92471	0.07529	0.01021	0.00813	0.00277	0.06253	0.24988	0.00708	0.85092	0.79199	0.01649	77.3002	41.8424	44.9558	13.2019
	E48R3W108_06	1295.64	51.492	0.39	1.675	0.015	12.002	0.379	13.894	19.461	0.287	99.595	1.93851	0.06149	0.01283	0.01104	0.000446485	0.04708	0.3308	0.01209	0.77973	0.78503	0.02095	70.2124	41.4142	41.1345	17.4513
	E48R3W108_07	1295.64	52.103	0.318	1.677	0.006	9.633	0.329	14.676	20.938	0.249	99.929	1.93955	0.06045	0.01313	0.0089	0.000176594	0.04732	0.25258	0.01037	0.81439	0.83515	0.01797	76.3274	43.9063	42.8149	13.2789
	E50R1W15_01	1310.75	52.498	0.4168	2.5011	0.0806	8.2511	0.2305	16.4341	20.207	0.2615	100.881	1.9164	0.0836	0.02402	0.01144	0.00233	0.05288	0.19902	0.00713	0.89429	0.79039	0.01851	81.7966	41.9593	47.4753	10.5654
	E50R1W15_02	1310.75	52.6814	0.3402	1.5724	0	9.58	0.5869	14.9711	20.9164	0.2617	100.91	1.94152	0.05848	0.00982	0.00943	0	0.04851	0.24677	0.01832	0.82248	0.82597	0.0187	76.9214	43.5818	43.3977	13.0205
	E50R1W15_03	1310.75	52.5638	0.2871	1.3527	0	10.4553	0.5495	14.2935	20.4099	0.2167	100.129	1.96169	0.03831	0.0212	0.00806	0	0.01667	0.30966	0.01737	0.79519	0.81617	0.01568	71.9729	42.4862	41.3943	16.1194
	E50R1W15_04	1310.75	51.1727	0.3691	3.4501	0.2954	6.2921	0.1276	16.3252	21.463	0.2103	99.7055	1.88027	0.11973	0.0297	0.0102	0.00858	0.07603	0.11732	0.00397	0.89419	0.84502	0.01498	88.4013	45.516	48.1645	6.31947
	E50R1W15_05	1310.75	51.1789	0.4738	4.2104	0.2282	7.7203	0.2129	15.3949	20.827	0.2699	100.516	1.87633	0.12367	0.05828	0.01306	0.00661	0.05183	0.18488	0.00661	0.84137	0.81816	0.01919	81.9847	44.359	45.6171	10.0239
	E50R1W15_06	1310.75	51.6122	0.3581	4.1644	0.6661	5.3595	0.1223	16.0107	22.5624	0.1914	101.047	1.87142	0.12858	0.0494	0.00977	0.0191	0.05401	0.10852	0.00376	0.8654	0.87659	0.01346	88.8576	47.3702	46.7655	5.86421
	E50R1W15_07	1310.75	52.7701	0.3456	1.381	0.0153	10.0585	0.5359	14.6841	20.7073	0.2113	100.709	1.95403	0.04597	0.0143	0.00962	0.000447943	0.02714	0.28435	0.01681	0.81055	0.8216	0.01517	74.0295	42.8698	42.2932	14.837
	E50R1W15_08	1310.75	52.831	0.2941	1.2547	0	9.785	0.5589	14.8081	21.0062	0.2215	100.76	1.95309	0.04691	0.00776	0.00818	0	0.03868	0.26385	0.0175	0.81606	0.8321	0.01588	75.5674	43.5196	42.6808	13.7996
	E50R1W15_09	1310.75	51.8964	0.3999	1.659	0	10.4063	0.334	14.7955	20.5152	0.231	100.237	1.9288	0.0712	0.00148	0.01118	0	0.06402	0.25945	0.01051	0.81973	0.817	0.01665	75.9588	43.0867	43.2307	13.6826
	E50R1W15_10	1310.75	52.6043	0.4268	2.2855	0.0635	10.0276	0.2861	15.3274	20.0443	0.2945	101.36	1.92698	0.07302	0.02566	0.01176	0.00184	0.04292	0.26429	0.00888	0.83698	0.78676	0.02092	76.0014	41.6709	44.3309	13.9982
	E50R1W15_11	1310.75	53.0212	0.3537	1.5694	0	10.1793	0.5568	14.5434	20.9224	0.226	101.372	1.95185	0.04815	0.01995	0.00979	0	0.02475	0.28864	0.01736	0.79809	0.82528	0.01613	73.4394	43.1629	41.7408	15.0963
	E50R1W15_12	1310.75	51.4384	0.4501	2.8644	0.0206	10.2393	0.4448	14.1861	20.8307	0.2136	100.688	1.90528	0.09472	0.03034	0.01254	0.000603292	0.05404	0.26315	0.01396	0.78329	0.82674	0.01534	74.8531	44.1357	41.8162	14.0482
	E50R1W15_13	1310.75	52.416	0.337	1.4088	0.0115	11.216	0.3808	13.5789	20.5106	0.2539	100.114	1.964	0.036	0.02622	0.0095	0.000340694	0.00889	0.34258	0.01209	0.75846	0.82348	0.01845	68.8855	42.7886	39.4103	17.8011
	E50R1W15_14	1310.75	52.037	0.3647	1.5313	0	10.8651	0.3335	14.1298	20.8438	0.2597	100.365	1.93831	0.06169	0.00554	0.01022	0	0.05448	0.28399	0.01052	0.78458	0.83192	0.01876	73.4233	43.774	41.283	14.943
	E50R1W15_15	1310.75	54.6644	0.2112	2.1415	0.5038	3.7113	0.0916	18.3147	22.0728	0.2032	101.915	1.94754	0.05246	0.03747	0.00566	0.01419	0.00353	0.10705	0.00276	0.97268	0.84262	0.01404	90.0851	43.8327	50.5984	5.5689
	E50R1W15_16	1310.75	52.8564	0.332	1.5887	0.0026	9.7673	0.5762	14.1457	21.3396	0.2655	100.874	1.95575	0.04425	0.02504	0.00924	7.60637e-05	0.01971	0.28254	0.01806	0.78024	0.84605	0.01905	73.4151	44.3229	40.8754	14.8017
	E50R1W15_17	1310.75	50.488	0.4826	5.0085	0.6377	5.8681	0.1259	15.4653	22.1828	0.2387	100.498	1.84332	0.15668	0.05886	0.01325	0.01841	0.06981	0.10937	0.00389	0.84171	0.86781	0.0169	88.5006	47.711	46.276	6.01293
	E50R1W15_18	1310.75	52.884	0.267	1.7074	0	10.2404	0.3164	14.8363	20.677	0.222	101.15	1.94727	0.05273	0.02137	0.00739	0	0.03242	0.28293	0.00987	0.81436	0.8158	0.01585	74.2153	42.6429	42.5677	14.7894
	E50R1W15_19	1310.75	52.1215	0.2755	1.6194	0.0276	10.2243	0.3207	14.9177	20.7601	0.2263	100.493	1.93037	0.06963	0.00107	0.00767	0.000808206	0.06865	0.24803	0.01006	0.8236	0.82385	0.01625	76.8545	43.4638	43.4506	13.0856
	E50R1W15_20	1310.75	53.1175	0.2404	2.2779	0.0795	6.0906	0.159	17.386	21.5008	0.151	101.003	1.92241	0.07759	0.01958	0.00654	0.00227	0.05324	0.13111	0.00487	0.93799	0.83379	0.0106	87.7367	43.8172	49.2929	6.88987
	E50R1W15_21	1310.75	52.9175	0.2822	1.8661	0.0685	9.7075	0.2849	14.8268	21.014	0.2489	101.216	1.94469	0.05531	0.02553	0.0078	0.00199	0.02993	0.26843	0.00887	0.81225	0.82747	0.01774	75.161	43.3652	42.5673	14.0675
	E50R1W15_22	1310.75	52.7468	0.3196	1.4365	0.0166	10.7216	0.3435	14.5051	20.7863	0.2289	101.105	1.94835	0.05165	0.01089	0.00888	0.000484805	0.03892	0.29229	0.01075	0.79869	0.8227	0.01639	73.2083	42.9903	41.7358	15.2739
	E50R1W15_23	1310.75	52.2738	0.3562	1.9731	0.0748	11.746	0.3166	14.387	19.2029	0.1928	100.523	1.94662	0.05338	0.03322	0.00998	0.0022	0.01193	0.35389	0.00999	0.79865	0.76623	0.01392	69.2949	39.9334	41.6231	18.4435
	E51R2W61_01	1321.76	49.7468	0.7498	5.1941	0.229	8.1834	0.1687	14.4309	22.0182	0.3107	101.032	1.82043	0.17957	0.04446	0.02064	0.00663	0.10926	0.14119	0.00523	0.78721	0.86334	0.02205	84.7925	48.1847	43.9355	7.87982
	E51R2W61_02	1321.76	51.8041	0.4353	3.4327	0.3075	7.1182	0.17	16.8907	20.7724	0.2559	101.187	1.8761	0.1239	0.02263	0.01186	0.0088	0.08672	0.12887	0.00521	0.91186	0.80607	0.01797	87.6174	43.6468	49.3752	6.97801
	E51R2W61_03	1321.76	51.3855	0.5016	4.4834	0.7222	5.5405	0.1743	16.2834	21.8899	0.2134	101.194	1.8594	0.1406	0.05062	0.01365	0.02066	0.05699	0.11068	0.00534	0.87835	0.84873	0.01497	88.809	46.1829	47.7944	6.02268
	E51R2W61_04	1321.76	51.3138	0.4401	4.4359	0.658	5.6046	0.1297	16.529	21.6197	0.2041	100.935	1.85933	0.14067	0.04879	0.01199	0.01885	0.06338	0.10646	0.00398	0.89281	0.8394	0.01434	89.3463	45.6525	48.5575	5.79005
	E51R2W61_05	1321.76	49.8494	0.8107	5.2756	0.3654	8.116	0.1772	14.6949	21.1879	0.3483	100.825	1.82619	0.17381	0.05399	0.02234	0.01058	0.08931	0.15935	0.0055	0.80249	0.8317	0.02474	83.4331	46.372	44.7435	8.8845
	E51R2W61_06	1321.76	49.246	0.8656	7.2366	0.0697	6.767	0.1279	13.9053	22.734	0.2207	101.173	1.79459	0.20541	0.10542	0.02372	0.00201	0.06613	0.1401	0.00395	0.75538	0.88769	0.01559	84.3546	49.7818	42.3614	7.85687
	E51R2W61_07	1321.76	52.4053	0.5103	2.5749	0	9.2199	0.3349	15.5576	20.0625	0.3124	100.978	1.92114	0.07886	0.0324	0.01407	0	0.04053	0.24214	0.0104	0.85019	0.78807	0.02221	77.8327	41.9096	45.2133	12.8771
	E51R2W61_08	1321.76	51.816	0.4416	3.9305	0.4476	6.6733	0.1848	16.6969	20.1626	0.3066	100.66	1.88488	0.11512	0.05341	0.01208	0.01287	0.0463	0.15672	0.00569	0.90541	0.78589	0.02163	85.2449	42.526	48.9936	8.48033
	E51R2W61_09	1321.76	51.6375	0.6188	4.3565	0.1457	8.4117	0.2368	15.1629	21.0917	0.3336	101.995	1.87027	0.12973	0.05626	0.01686	0.00417	0.05902	0.19578	0.00726	0.81867	0.81855	0.02343	80.7009	44.6562	44.663	10.6809
	E51R2W61_10	1321.76	50.4687	0.7163	6.4506	0.5157	6.6025	0.1047	14.5636	22.7612	0.2254	102.409	1.816	0.184	0.08958	0.01938	0.01467	0.0567	0.14199	0.00319	0.78118	0.87757	0.01573	84.6197	48.734	43.3811	7.88488
	E51R2W61_11	1321.76	50.5052	0.6663	4.9121	0.5064	7.2888	0.1575	15.4846	21.5076	0.2916	101.32	1.83456	0.16544	0.04487	0.0182	0.01454	0.09016	0.13126	0.00485	0.83846	0.83711	0.02054	86.4638	46.33	46.4051	7.2649
	E51R2W61_12	1321.76	51.2734	0.379	3.5636	0.5189	6.2019	0.1264	16.8325	20.964	0.2294	100.089	1.87363	0.12637	0.02713	0.01042	0.01499	0.07967	0.10987	0.00391	0.91692	0.82084	0.01625	89.3	44.4269	49.6268	5.94631
	E51R2W61_13	1321.76	51.8638	0.5491	3.799	0.1551	7.5324	0.1602	15.0224	21.8428	0.2629	101.188	1.89248	0.10752	0.05588	0.01507	0.00447	0.03563	0.19423	0.00495	0.81714	0.85402	0.0186	80.795	45.7824	43.8051	10.4125
	E51R2W61_14	1321.76	51.5728	0.6591	2.7893	0.0334	9.5683	0.2995	15.8538	19.747	0.32	100.843	1.89169	0.10831	0.01228	0.01818	0.000968645	0.08145	0.21207	0.00931	0.86687	0.77611	0.02276	80.3446	41.8379	46.7301	11.432
	E51R2W61_15	1321.76	50.009	0.6196	4.7156	0.4736	6.8621	0.129	15.2153	21.9831	0.2641	100.271	1.83512	0.16488	0.03908	0.0171	0.01374	0.09665	0.11394	0.00401	0.83231	0.86437	0.01879	87.9584	47.7387	45.9682	6.29311
	E51R2W61_16	1321.76	53.164	0.3615	2.3139	0.2875	6.0562	0.1552	17.6716	21.1547	0.14	101.305	1.91809	0.08191	0.01649	0.00981	0.0082	0.0474	0.13534	0.00474	0.95042	0.81781	0.00979	87.5354	42.962	49.9285	7.10957
	E51R2W61_17	1321.76	51.1236	0.5268	3.7135	0.2639	6.975	0.1477	15.5226	21.7961	0.265	100.334	1.87486	0.12514	0.03538	0.01453	0.00765	0.0719	0.14203	0.00459	0.8486	0.85649	0.01884	85.6626	46.3689	45.9418	7.68931
	E51R2W61_18	1321.76	50.87	0.545	4.3171	0.0754	8.028	0.2768	15.1072	21.5993	0.274	101.093	1.85705	0.14295	0.04281	0.01496	0.00218	0.08744	0.15766	0.00856	0.82212	0.84488	0.0194	83.9085	46.3034	45.056	8.6406
	E51R2W61_19	1321.76	51.7085	0.5703	3.0332	0.0096	9.1144	0.2704	15.2812	20.3186	0.3453	100.651	1.90118	0.09882	0.03263	0.01577	0.000279075	0.05899	0.22127	0.00842	0.83754	0.80048	0.02462	79.102	43.0528	45.0464	11.9008
	E51R2W61_20	1321.76	51.6733	0.4735	2.535	0.0392	7.8804	0.2461	16.2107	21.1075	0.2108	100.376	1.8956	0.1044	0.00522	0.01306	0.00114	0.08691	0.15486	0.00765	0.88649	0.82968	0.01499	85.1289	44.3436	47.3796	8.27673
	E51R2W61_21	1321.76	51.1987	0.4724	3.3924	0.3563	6.8081	0.1641	16.3754	21.5062	0.2714	100.545	1.86775	0.13225	0.01362	0.01296	0.01028	0.10164	0.10607	0.00507	0.89051	0.84065	0.0192	89.3562	45.7563	48.4701	5.77358
	E51R2W61_22	1321.76	50.7743	0.6619	4.1592	0.1951	7.6478	0.1264	15.1139	22.2986	0.2693	101.246	1.85008	0.14992	0.02871	0.01814	0.00562	0.09833	0.13472	0.0039	0.82094	0.8706	0.01903	85.9028	47.6711	44.952	7.37692
	E51R2W61_23	1321.76	49.1038	0.8431	5.2416	0.0735	9.1277	0.1999	14.2691	21.1398	0.2987	100.297	1.81398	0.18602	0.04221	0.02342	0.00215	0.11621	0.16579	0.00626	0.78578	0.83678	0.0214	82.5773	46.7906	43.9389	9.2705
	E51R2W61_24	1321.76	50.4179	0.6266	4.1494	0.1627	8.1565	0.1675	15.0188	21.5844	0.2956	100.579	1.85085	0.14915	0.0304	0.0173	0.00472	0.10047	0.14995	0.00521	0.82189	0.84903	0.02104	84.5706	46.6277	45.1372	8.23502
	E51R2W61_25	1321.76	51.3523	0.5737	3.35	0.0857	7.441	0.2109	15.8342	21.5859	0.2758	100.71	1.8764	0.1236	0.02068	0.01577	0.00248	0.08846	0.13893	0.00653	0.86248	0.84514	0.01954	86.1266	45.7686	46.7077	7.52373
	E51R2W61_26	1321.76	49.5494	0.7886	5.102	0.2022	8.575	0.2243	14.2658	21.4293	0.3121	100.449	1.82653	0.17347	0.04822	0.02186	0.00589	0.09794	0.16642	0.007	0.78393	0.84643	0.02231	82.4885	47.1083	43.6296	9.26214
	E51R2W61_27	1321.76	50.9796	0.5891	3.6294	0.5569	7.0482	0.2087	16.7661	20.0156	0.2728	100.066	1.86771	0.13229	0.02443	0.01623	0.01613	0.07865	0.13731	0.00648	0.91566	0.78573	0.01938	86.9596	42.733	49.7992	7.46782
	E51R2W61_28	1321.76	51.3217	0.6069	3.6625	0.4466	7.6931	0.2389	16.2942	19.983	0.3024	100.549	1.87695	0.12305	0.03483	0.01669	0.01291	0.06336	0.17194	0.0074	0.88833	0.78308	0.02144	83.7832	42.4813	48.191	9.32771
	E51R2W61_29	1321.76	50.8735	0.5195	5.0135	0.606	6.5126	0.1508	15.4774	21.6403	0.2328	101.026	1.85098	0.14902	0.06599	0.01422	0.01743	0.05359	0.14458	0.00465	0.83946	0.84366	0.01642	85.307	46.1597	45.9296	7.91074
	E52R3W30_01	1332.76	52.322	0.345	2.325	0.505	6.507	0.211	17.01	20.493	0.245	99.963	1.91775	0.08225	0.0182	0.00951	0.01463	0.04781	0.15165	0.00655	0.9294	0.80484	0.01741	85.972	42.6768	49.2818	8.0414
	E52R3W30_02	1332.76	51.529	0.55	2.681	0.38	6.449	0.231	15.617	21.646	0.362	99.445	1.90551	0.09449	0.02237	0.0153	0.01111	0.05637	0.14308	0.00724	0.86089	0.85769	0.02596	85.7486	46.0714	46.2431	7.68547
	E52R3W30_03	1332.76	50.372	0.588	3.768	0.231	7.472	0.198	14.851	21.545	0.365	99.39	1.86932	0.13068	0.03414	0.01641	0.00678	0.0832	0.1487	0.00622	0.82156	0.85671	0.02626	84.6742	46.8923	44.9683	8.13938
	E52R3W30_04	1332.76	50.838	0.533	3.7	0.192	7.671	0.253	15.069	21.316	0.272	99.844	1.87919	0.12081	0.0404	0.01482	0.00561	0.06466	0.17248	0.00792	0.83034	0.84427	0.0195	82.8005	45.7081	44.9539	9.33807
	E54R2W46_01	1350.81	50.3057	0.4759	4.4818	0.3652	5.4536	0.0587	15.7144	22.8122	0.1934	99.8609	1.84457	0.15543	0.03827	0.01312	0.01059	0.09408	0.07315	0.00182	0.85894	0.89627	0.01375	92.1517	49.0202	46.9787	4.00105
	E54R2W46_02	1350.81	52.7281	0.4325	2.7873	0.4351	6.8417	0.1584	17.215	20.2042	0.3041	101.106	1.90975	0.09025	0.02874	0.01178	0.01246	0.04684	0.1604	0.00486	0.92946	0.7841	0.02136	85.2825	41.8418	49.5988	8.55942
	E54R2W46_03	1350.81	50.7625	0.5583	3.4671	0.1357	9.2839	0.2254	15.7034	19.9827	0.2943	100.413	1.86759	0.13241	0.01794	0.01545	0.00395	0.10062	0.18504	0.00702	0.86124	0.78775	0.02099	82.3143	42.9519	46.9588	10.0894
	E54R2W46_04	1350.81	52.6034	0.2692	2.7321	0.544	4.1206	0.0603	16.9337	23.7522	0.1887	101.204	1.8954	0.1046	0.01143	0.00729	0.0155	0.07627	0.0479	0.00184	0.90955	0.91703	0.01318	94.9972	48.9218	48.5228	2.55536
	E54R2W46_05	1350.81	51.5971	0.5325	2.9467	0.0825	9.2415	0.2616	16.5963	18.9484	0.2804	100.487	1.89219	0.10781	0.01957	0.01469	0.00239	0.07641	0.20702	0.00813	0.90728	0.74457	0.01994	81.4212	40.055	48.8079	11.1371
	E54R2W46_06	1350.81	52.7207	0.3771	2.5239	0.4085	5.8206	0.1546	17.0954	22.2751	0.1365	101.512	1.90125	0.09875	0.00854	0.01023	0.01165	0.06765	0.1079	0.00472	0.91903	0.86074	0.00954	89.4928	45.5981	48.6857	5.71614
	E54R2W46_07	1350.81	52.1645	0.5527	2.8063	0.2723	8.7507	0.2139	16.3947	19.7801	0.2466	101.182	1.90182	0.09818	0.02241	0.01515	0.00785	0.05504	0.21177	0.00661	0.89102	0.77271	0.01743	80.7967	41.2002	47.5083	11.2915
	E54R2W46_08	1350.81	51.5511	0.6412	2.8313	0.0041	9.9318	0.2497	15.7424	19.4939	0.3209	100.766	1.89406	0.10594	0.01668	0.01772	0.000119105	0.07656	0.22862	0.00777	0.86222	0.76745	0.02286	79.0418	41.2987	46.3985	12.3027
	E54R2W46_09	1350.81	51.0235	0.6022	4.5507	0.393	6.0933	0.1395	15.6274	22.6708	0.3041	101.404	1.8463	0.1537	0.04039	0.01639	0.01124	0.09063	0.09377	0.00428	0.84296	0.87901	0.02134	89.9899	48.4105	46.4253	5.16417
	E54R2W46_10	1350.81	50.9297	0.7128	3.7304	0.072	7.3376	0.1168	15.43	22.6369	0.2339	101.2	1.85425	0.14575	0.01434	0.01952	0.00207	0.10682	0.11661	0.0036	0.83744	0.8831	0.01651	87.7777	48.0691	45.5838	6.34715
	E54R2W46_11	1350.81	49.5228	0.6653	5.6555	0.1436	7.0935	0.0643	14.4584	22.5807	0.2061	100.39	1.81839	0.18161	0.06316	0.01837	0.00417	0.09222	0.12561	0.002	0.79139	0.88841	0.01467	86.3018	49.2081	43.8344	6.95757
	E54R2W46_12	1350.81	51.4265	0.6128	3.7125	0.0512	7.9533	0.2206	15.1817	22.0614	0.2855	101.505	1.87063	0.12937	0.02981	0.01676	0.00147	0.0847	0.15725	0.0068	0.82321	0.85986	0.02014	83.9614	46.7234	44.7318	8.54483
	E54R2W46_13	1350.81	51.1272	0.4904	3.331	0.206	7.4238	0.1837	16.6353	20.6689	0.2294	100.296	1.87041	0.12959	0.01404	0.01349	0.00596	0.09888	0.12825	0.00569	0.9072	0.81021	0.01627	87.6139	43.8979	49.1532	6.94888
	E54R2W46_14	1350.81	49.621	0.6778	4.2455	0.2087	7.835	0.1653	15.0698	21.3662	0.2448	99.4341	1.84079	0.15921	0.02642	0.01891	0.00612	0.10646	0.13662	0.00519	0.83336	0.8493	0.01761	85.9149	46.683	45.8072	7.50977
	E54R2W46_15	1350.81	51.2276	0.5125	4.6941	0.407	6.6521	0.1374	15.4595	22.2248	0.2738	101.589	1.85376	0.14624	0.05398	0.01395	0.01164	0.07194	0.12938	0.00421	0.83394	0.86175	0.01921	86.5691	47.2173	45.6935	7.0892
