# Supplementary material for: Basalt derived from highly refractory mantle sources during early Izu-Bonin-Mariana arc development
Source: Research Square preprint supplement (doi:10.21203/rs.3.rs-89845/v1), 2020-10-12
Supplement: Supplementary file 8 [file 683e6d395c33f2a811908c47.xlsx]

## Sheet: Sheet1
Supplementary 1 Table 4. Major element compositions of spinel in Unit 1. (ND = not detected)
Spinel	E70R2W56-01	E70R2W56-02	E70R2W56-03	E70R2W56-04	E70R2W56-06	E70R2W56-07	E70R2W56-08	E70R2W56-09	E70R2W56-10	E73R1W77-01	E73R1W77-02	E73R1W77-03
Depth (mbsf)	1466.16	1466.16	1466.16	1466.16	1466.16	1466.16	1466.16	1466.16	1466.16	1485.17	1485.17	1485.17
SiO2	0.5808	0.1127	0.2243	0.1357	0.25	0.145	0.1511	0.7833	0.0942	0.0932	0.0935	0.0646
TiO2	0.5532	13.9439	14.7248	11.6774	15.4928	16.0102	14.9662	15.3549	16.7312	0.4247	0.3033	0.2588
Al2O3	18.3395	3.2701	2.5673	3.1717	2.7228	2.3979	2.4992	2.4706	1.9828	31.136	37.7224	33.1692
Cr2O3	41.2133	0.0989	0.0671	0.0811	0.0652	0.071	0.0518	0.0922	0.0604	27.5217	24.9058	32.8263
FeO	23.069	71.3227	71.3572	74.3575	69.658	69.6087	71.2363	68.4687	68.1418	28.4453	20.4723	15.7545
MnO	0.1607	0.7665	1.9579	0.5922	1.8554	2.5899	2.1808	3.0926	4.5123	0.3216	0.1773	0.1307
MgO	11.9754	0.6609	0.2992	0.6988	0.4472	0.2202	0.1621	0.544	0.0537	9.4812	14.2398	16.4059
CaO	0.5326	0.0119	0.0318	0.0377	0.0515	0.0186	0.04	0.0526	0.0288	0.1833	0.1695	0.037
Na2O	ND	ND	ND	0.0203	0.0011	ND	0.0103	0.0082	ND	0.0001	ND	0.0055
Total	96.4245	90.1876	91.2296	90.7724	90.544	91.0615	91.2978	90.8671	91.6052	97.6071	98.0839	98.6525
Si4+	0.01873	0.00446	0.00883	0.00532	0.00991	0.00574	0.00595	0.03089	0.00372	0.00287	0.00272	0.00188
Al3+	0.69693	0.15249	0.11915	0.14655	0.12716	0.11182	0.1161	0.11483	0.09227	1.13196	1.29307	1.13759
Ti4+	0.01341	0.41489	0.43602	0.34426	0.46166	0.47638	0.44359	0.45535	0.4968	0.00985	0.00663	0.00566
Cr3+	1.05057	0.00309	0.00209	0.00251	0.00204	0.00222	0.00161	0.00287	0.00189	0.67116	0.57268	0.7552
Fe3+	0.18822	1.00572	0.98906	1.15332	0.92774	0.92171	0.98399	0.91045	0.9048	0.17143	0.11555	0.09244
Fe2+	0.4338	1.35418	1.36065	1.28441	1.38053	1.38155	1.36395	1.34749	1.34523	0.56232	0.38238	0.29094
Mn2+	0.00439	0.02569	0.0653	0.01966	0.06227	0.0868	0.0728	0.10329	0.15091	0.0084	0.00437	0.00322
Mg2+	0.57555	0.03898	0.01756	0.04083	0.02641	0.01299	0.00952	0.03198	0.00316	0.43593	0.61733	0.7116
Ca2+	0.0184	0.000504465	0.00134	0.00158	0.00219	0.000788518	0.00169	0.00222	0.00122	0.00606	0.00528	0.00115
Na1+	0	0	0	0.00154	8.4511e-05	0	0.000787099	0.000626959	0	5.98061e-06	0	0.000310308
100*Mg/(Mg+Fe2+)	57.0214	2.7978	1.2742	3.08128	1.87739	0.93128	0.69337	2.31804	0.23439	43.6693	61.7509	70.9796
100*Fe3+/(Cr+Al+Fe3+)	9.7233	86.6024	89.0808	88.5547	87.7756	88.9892	89.3157	88.552	90.5742	8.68205	5.83184	4.65623
100*Fe2+/(Mg+Fe2+)	42.9786	97.2022	98.7258	96.9187	98.1226	99.0687	99.3066	97.682	99.7656	56.3307	38.2491	29.0204
100*Cr/(Cr+Al)	60.1185	1.98838	1.723	1.68628	1.58088	1.94748	1.37126	2.44218	2.00244	37.2223	30.6942	39.8986
	18.4203
Supplementary 1 Table 4. Continued
Spinel	E73R1W77-04	E73R1W77-05	E73R1W77-06	E73R1W77-07	E73R1W77-08	E73R1W77-09	E73R1W77-10	E73R1W77-11	E73R1W77-12	E73R1W77-14	E73R1W77-15	E73R1W77-16
Depth (mbsf)	1485.17	1485.17	1485.17	1485.17	1485.17	1485.17	1485.17	1485.17	1485.17	1485.17	1485.17	1485.17
SiO2	0.1564	5.4347	0.4466	0.151	0.4513	0.1704	0.5094	0.0824	0.1099	0.0776	0.1187	0.1083
TiO2	0.6566	16.4063	18.8205	13.3233	5.2569	16.9997	15.5462	0.1916	0.2158	0.1701	0.1898	0.181
Al2O3	23.521	2.6664	1.8988	3.2099	11.3289	2.4659	2.8641	45.9562	39.3691	46.2977	45.7445	46.2444
Cr2O3	32.2496	0.0063	0.0176	0.1014	23.9417	0.0309	0.0279	20.8616	26.3916	20.7944	20.9501	20.5844
FeO	32.2164	54.4188	62.8057	73.4973	47.0375	65.9852	69.4393	13.757	16.198	13.6492	13.7198	13.8366
MnO	0.2969	7.4337	8.3829	0.5191	5.4734	6.738	2.2938	0.0944	0.1444	0.0957	0.1181	0.1195
MgO	6.1662	2.625	0.1613	0.9899	1.2176	0.0854	0.7169	18.9752	16.6876	19.0123	18.8212	18.7453
CaO	0.2038	0.5558	0.1106	0.0704	0.1325	0.1544	0.1145	ND	0.0415	ND	0.0158	0.0121
Na2O	ND	0.0312	ND	ND	ND	ND	0.018	ND	0.005	ND	0.0016	ND
Total	95.4669	89.5782	92.644	91.8623	94.8398	92.6299	91.5301	99.9184	99.1629	100.097	99.6796	99.8316
Si4+	0.00519	0.21092	0.01744	0.00585	0.01639	0.00663	0.01989	0.00223	0.00311	0.0021	0.00323	0.00294
Al3+	0.91926	0.12198	0.08738	0.14647	0.48487	0.11314	0.1318	1.46717	1.31156	1.47415	1.46524	1.47775
Ti4+	0.01637	0.47887	0.55262	0.3879	0.14356	0.49765	0.45646	0.0039	0.00459	0.00346	0.00388	0.00369
Cr3+	0.84546	0.00019332	0.000543304	0.0031	0.68735	0.000950986	0.00086122	0.44676	0.58977	0.44414	0.45014	0.44123
Fe3+	0.19217	0.5006	0.77196	1.06292	0.50789	0.87735	0.91601	0.0738	0.08355	0.07061	0.07049	0.06776
Fe2+	0.7012	1.26573	1.27881	1.31668	0.92053	1.27073	1.35125	0.23782	0.29934	0.23776	0.24132	0.24596
Mn2+	0.00834	0.24438	0.27723	0.01702	0.16835	0.22216	0.07586	0.00217	0.00346	0.00219	0.00272	0.00274
Mg2+	0.30478	0.15187	0.00939	0.05713	0.06591	0.00496	0.04172	0.76614	0.7031	0.76561	0.76244	0.75757
Ca2+	0.00724	0.02311	0.00463	0.00292	0.00516	0.00644	0.00479	0	0.00126	0	0.000460066	0.000351496
Na1+	0	0.00235	0	0	0	0	0.00136	0	0.00027402	0	8.43082e-05	0
100*Mg/(Mg+Fe2+)	30.2968	10.713	0.72876	4.15827	6.68128	0.38845	2.9952	76.3115	70.1391	76.304	75.9586	75.4904
100*Fe3+/(Cr+Al+Fe3+)	9.82015	80.3828	89.7747	87.6639	30.2294	88.4926	87.3497	3.71285	4.20929	3.55006	3.54977	3.41064
100*Fe2+/(Mg+Fe2+)	69.7032	89.287	99.2712	95.8417	93.3187	99.6115	97.0048	23.6885	29.8609	23.696	24.0414	24.5096
100*Cr/(Cr+Al)	47.909	0.15824	0.61791	2.07504	58.6367	0.83355	0.64919	23.3424	31.0189	23.1527	23.5011	22.993
Supplementary 1 Table 4. Continued
Spinel	E73R1W77-18	E73R1W77-19	E73R1W77-20	E73R1W77-21	E73R1W77-22	E73R1W77-23	E73R1W77-25	E73R1W77-26	E73R1W77-27	E73R1W77-28	E73R1W77-29	E73R1W77-30
Depth (mbsf)	1485.17	1485.17	1485.17	1485.17	1485.17	1485.17	1485.17	1485.17	1485.17	1485.17	1485.17	1485.17
SiO2	0.0937	0.1082	0.0958	0.0893	0.1192	0.0439	0.0608	0.0943	0.1318	0.3501	0.1111	0.6041
TiO2	0.1935	0.1891	0.2021	0.267	0.3321	0.7621	0.2334	0.2577	0.1886	0.2368	0.3286	9.6021
Al2O3	38.616	39.7718	42.7231	29.7824	33.9391	31.9013	33.1685	35.9005	44.8781	42.6284	32.0536	12.3131
Cr2O3	28.8033	27.394	24.5229	36.6321	26.789	27.7167	31.9154	27.2072	20.93	20.6704	27.8929	23.5431
FeO	14.3683	14.5343	14.0498	19.7307	23.8275	29.3433	19.1109	15.9753	14.8855	16.4482	25.6481	39.5785
MnO	0.1296	0.0958	0.1194	0.1818	0.2253	0.4043	0.1883	0.1169	0.1295	0.1105	0.2469	5.1016
MgO	17.5371	17.9662	18.5845	14.7354	12.9645	8.903	14.0213	16.1399	18.0837	17.6651	11.5138	3.2083
CaO	0.026	ND	0.0337	0.0423	0.2849	0.077	0.0567	0.1039	0.0695	0.076	0.2181	0.5336
Na2O	ND	ND	0.0065	0.0051	0.0081	0.0181	ND	0.0052	ND	0.0357	0.0012	0.0063
Total	99.7675	100.059	100.338	101.466	98.4897	99.1697	98.7553	95.8009	99.2967	98.2212	98.0143	94.4907
Si4+	0.00263	0.00301	0.00262	0.0026	0.00353	0.00134	0.00179	0.00278	0.00362	0.00977	0.00336	0.02164
Al3+	1.27824	1.30452	1.37842	1.02212	1.18449	1.14633	1.15359	1.24757	1.45177	1.40285	1.14198	0.51993
Ti4+	0.00409	0.00396	0.00416	0.00585	0.0074	0.01747	0.00518	0.00571	0.00389	0.00497	0.00747	0.2587
Cr3+	0.63955	0.60272	0.53073	0.84331	0.62715	0.66808	0.74458	0.63421	0.45417	0.4563	0.6666	0.66685
Fe3+	0.06877	0.07882	0.07763	0.11796	0.16697	0.14903	0.08787	0.10153	0.07905	0.11329	0.16984	0.25296
Fe2+	0.26869	0.25943	0.24401	0.36249	0.42307	0.59912	0.38373	0.29236	0.26262	0.27078	0.47852	0.93284
Mn2+	0.00308	0.00226	0.00277	0.00448	0.00565	0.01044	0.00471	0.00292	0.00301	0.00261	0.00632	0.15481
Mg2+	0.73416	0.74528	0.75833	0.63957	0.57223	0.4046	0.61674	0.70933	0.73984	0.73522	0.51879	0.17133
Ca2+	0.000782369	0	0.000988418	0.00132	0.00904	0.00252	0.00179	0.00328	0.00204	0.00227	0.00706	0.02048
Na1+	0	0	0.000344993	0.000287932	0.000465045	0.00107	0	0.000297265	0	0.00193	7.03303e-05	0.000437623
100*Mg/(Mg+Fe2+)	73.2072	74.1784	75.656	63.8253	57.4934	40.3103	61.6448	70.8131	73.8025	73.0837	52.019	15.5169
100*Fe3+/(Cr+Al+Fe3+)	3.46174	3.96875	3.9071	5.9476	8.4388	7.59015	4.42459	5.11946	3.98217	5.74357	8.58446	17.5698
100*Fe2+/(Mg+Fe2+)	26.7928	25.8216	24.344	36.1747	42.5066	59.6897	38.3552	29.1869	26.1975	26.9163	47.981	84.4831
100*Cr/(Cr+Al)	33.3482	31.6018	27.7994	45.2074	34.6179	36.8208	39.2263	33.7027	23.8292	24.5433	36.8575	56.1898
Supplementary 1 Table 4. Continued
Spinel	E73R2W61-01	E73R2W61-02	E73R2W61-03	E73R2W61-04	E73R2W61-05	E73R2W61-06	E73R2W61-07	E73R2W61-08	E73R2W61-09	E73R2W61-10	E73R2W61-11	E73R2W61-12
Depth (mbsf)	1486.2	1486.2	1486.2	1486.2	1486.2	1486.2	1486.2	1486.2	1486.2	1486.2	1486.2	1486.2
SiO2	0.047	0.084	0.107	0.0666	0.124	0.3776	0.4061	0.1107	0.0873	0.0934	0.0887	0.079
TiO2	0.155	0.163	0.168	0.1969	0.1719	0.2044	0.1915	0.1903	0.1662	0.1756	0.1829	0.174
Al2O3	49.812	49.959	49.663	40.5308	43.6854	41.3322	39.9343	47.2188	47.2166	44.8262	44.9716	46.879
Cr2O3	17.693	17.261	17.983	26.2149	21.28	24.438	24.8262	20.1547	20.6219	21.6497	21.491	20.804
FeO	13.55	13.379	13.758	13.3952	13.7742	13.6195	13.6861	12.8023	13.1745	13.0094	13.0414	15.033
MnO	0.141	0.136	0.122	0.1175	0.1119	0.1181	0.1149	0.0864	0.1015	0.0965	0.0934	0.165
MgO	18.517	18.62	18.416	18.2056	18.3864	18.2298	17.9741	19.641	19.2467	19.2203	19.3089	17.508
CaO	0.056	0.021	0.022	0.4826	0.0358	0.1598	0.1526	0.026	0.0286	0.0466	0.0468	0.01
Na2O	ND	0.027	0.019	0.0501	0.0073	0.0076	0.0107	0.0035	ND	0.0072	ND	ND
Total	99.971	99.65	100.258	99.2602	97.5769	98.487	97.2965	100.234	100.643	99.1249	99.2247	100.652
Si4+	0.00126	0.00225	0.00286	0.00185	0.00346	0.01055	0.01152	0.00297	0.00234	0.00255	0.00242	0.00214
Al3+	1.57295	1.57906	1.56641	1.32987	1.43503	1.36055	1.33506	1.49161	1.49077	1.44287	1.44507	1.49696
Ti4+	0.00312	0.00329	0.00338	0.00412	0.0036	0.00429	0.00408	0.00384	0.00335	0.00361	0.00375	0.00355
Cr3+	0.37477	0.36596	0.38047	0.57697	0.4689	0.53961	0.55674	0.42707	0.43675	0.46745	0.46323	0.44562
Fe3+	0.04352	0.04531	0.04162	0.08391	0.08234	0.07058	0.07758	0.06789	0.0611	0.07774	0.07937	0.04605
Fe2+	0.26008	0.25473	0.26627	0.22794	0.23871	0.24752	0.24707	0.21905	0.23403	0.21937	0.21796	0.29455
Mn2+	0.0032	0.00309	0.00277	0.00277	0.00264	0.00279	0.00276	0.00196	0.0023	0.00223	0.00216	0.00379
Mg2+	0.7395	0.7443	0.7346	0.75547	0.76385	0.75892	0.75996	0.78468	0.76853	0.78243	0.78468	0.70706
Ca2+	0.00161	0.000603386	0.000630792	0.01439	0.00107	0.00478	0.00464	0.00074663	0.000820871	0.00136	0.00137	0.000290284
Na1+	0	0.0014	0.000985833	0.0027	0.000394482	0.000411546	0.000588462	0.000181881	0	0.000381248	0	0
100*Mg/(Mg+Fe2+)	73.9813	74.502	73.3962	76.8216	76.1903	75.4063	75.4656	78.1761	76.6565	78.1022	78.2613	70.5922
100*Fe3+/(Cr+Al+Fe3+)	2.18544	2.27631	2.09312	4.21509	4.14537	3.58123	3.93914	3.4176	3.07267	3.91055	3.9933	2.3158
100*Fe2+/(Mg+Fe2+)	26.0187	25.498	26.6038	23.1784	23.8097	24.5937	24.5344	21.8239	23.3435	21.8978	21.7387	29.4078
100*Cr/(Cr+Al)	19.2416	18.8153	19.5426	30.2582	24.6281	28.398	29.4291	22.2587	22.6586	24.4697	24.2743	22.9396
Supplementary 1 Table 4. Continued
Spinel	E73R2W61-13	E73R2W61-15	E73R2W61-16	E73R2W61-19	E73R2W61-20	E73R2W61-21	E73R2W61-23	E73R2W61-24	E73R2W61-25	E73R2W61-26	E73R2W61-27	E73R2W61-28
Depth (mbsf)	1486.2	1486.2	1486.2	1486.2	1486.2	1486.2	1486.2	1486.2	1486.2	1486.2	1486.2	1486.2
SiO2	0.43	0.076	0.096	0.081	0.105	0.16	0.086	0.047	0.067	0.05	0.078	0.091
TiO2	0.208	0.178	0.179	0.187	0.207	0.165	0.193	0.195	0.177	0.163	0.183	0.194
Al2O3	45.165	46.879	47.28	44.764	44.922	47.923	48.849	48.596	48.695	48.198	47.827	48.177
Cr2O3	19.336	19.957	19.784	22.414	21.618	19.405	18.817	18.318	19.144	18.835	18.684	18.519
FeO	16.403	14.734	15.114	14.663	14.746	14.139	13.933	14.117	14.094	13.857	13.905	13.848
MnO	0.164	0.159	0.159	0.146	0.125	0.139	0.147	0.127	0.129	0.135	0.107	0.156
MgO	16.101	17.176	17.326	17.398	17.204	17.633	18.292	18.005	17.993	18.177	17.884	17.946
CaO	0.143	0.017	0.04	0.03	0.011	0.065	0.041	0.027	0.025	0.025	0.061	0.038
Na2O	ND	0.017	ND	0.021	0.008	0.005	ND	0.035	ND	0.035	0.004	0.01
Total	97.95	99.193	99.978	99.704	98.946	99.634	100.358	99.467	100.324	99.475	98.733	98.979
Si4+	0.01204	0.00208	0.00261	0.00223	0.00291	0.00435	0.00231	0.00127	0.0018	0.00135	0.00213	0.00248
Al3+	1.49089	1.51584	1.51647	1.45085	1.4652	1.53467	1.54536	1.55079	1.5446	1.53862	1.54006	1.54603
Ti4+	0.00438	0.00367	0.00366	0.00387	0.00431	0.00337	0.0039	0.00397	0.00358	0.00332	0.00376	0.00397
Cr3+	0.42815	0.43287	0.42565	0.4873	0.47298	0.41684	0.39931	0.39212	0.40733	0.40332	0.40357	0.39864
Fe3+	0.04812	0.04068	0.04533	0.05078	0.04783	0.03331	0.04292	0.04844	0.03729	0.05055	0.0448	0.04296
Fe2+	0.33607	0.29736	0.29863	0.28642	0.29343	0.28796	0.26983	0.27121	0.27991	0.26332	0.2729	0.27235
Mn2+	0.00389	0.00369	0.00366	0.0034	0.00293	0.0032	0.00334	0.00291	0.00294	0.0031	0.00248	0.0036
Mg2+	0.67218	0.7024	0.70281	0.71315	0.70967	0.71414	0.73185	0.72666	0.72181	0.73386	0.72831	0.72834
Ca2+	0.00429	0.000499707	0.00117	0.000883907	0.000326154	0.00189	0.00118	0.000783266	0.000720882	0.000725494	0.00179	0.00111
Na1+	0	0.000904277	0	0.00112	0.000429246	0.000263403	0	0.00184	0	0.00184	0.000211886	0.000527905
100*Mg/(Mg+Fe2+)	66.6681	70.2571	70.1801	71.3454	70.7474	71.2647	73.0623	72.8214	72.0568	73.5935	72.7433	72.7836
100*Fe3+/(Cr+Al+Fe3+)	2.44604	2.04504	2.28081	2.55307	2.4082	1.67817	2.15921	2.43241	1.87467	2.53688	2.25296	2.16134
100*Fe2+/(Mg+Fe2+)	33.3319	29.7429	29.8199	28.6546	29.2526	28.7353	26.9377	27.1786	27.9432	26.4065	27.2567	27.2163
100*Cr/(Cr+Al)	22.3107	22.2131	21.9169	25.1427	24.4032	21.3599	20.5336	20.182	20.8682	20.7691	20.7638	20.4992
Supplementary 1 Table 4. Continued
Spinel	E73R2W61-29	E73R2W61-30	E73R2W61-32	E73R2W61-33	E73R2W61-34	E73R2W61-37	E73R2W61-38	E73R2W61-39	E73R2W61-40	E73R2W61-41	E73R2W61-43	E73R2W61-46
Depth (mbsf)	1486.2	1486.2	1486.2	1486.2	1486.2	1486.2	1486.2	1486.2	1486.2	1486.2	1486.2	1486.2
SiO2	0.091	0.162	0.079	0.085	0.092	0.109	0.042	0.065	0.029	0.084	0.082	0.292
TiO2	0.166	0.187	0.178	0.178	0.203	0.227	0.285	0.281	0.325	0.225	0.153	0.171
Al2O3	48.627	48.513	48.564	48.145	47.976	42.402	27.509	26.653	27.334	43.36	49.742	45.482
Cr2O3	18.653	18.536	19.156	19.128	18.588	24.403	37.025	37.503	37.12	23.781	16.623	17.177
FeO	14.196	14.186	13.849	13.955	14.45	15.886	16.482	16.343	16.355	14.686	13.55	16.336
MnO	0.116	0.14	0.134	0.147	0.182	0.196	0.183	0.246	0.206	0.117	0.145	0.159
MgO	18.048	17.578	17.69	17.582	17.087	16.095	14.891	14.668	14.58	17.052	18.545	15.088
CaO	0.035	0.074	0.048	0.021	0.045	0.056	0.057	0.056	0.043	0.045	0.025	0.101
Na2O	ND	0.02	0.016	ND	ND	ND	ND	ND	ND	0.011	0.002	ND
Total	99.932	99.396	99.714	99.241	98.623	99.374	96.474	95.815	95.992	99.361	98.867	94.806
Si4+	0.00246	0.0044	0.00214	0.00232	0.00253	0.00305	0.00128	0.00201	0.000892544	0.00233	0.00221	0.00842
Al3+	1.54641	1.55323	1.55059	1.54602	1.55285	1.40053	0.99104	0.97016	0.9916	1.41922	1.58317	1.54631
Ti4+	0.00337	0.00382	0.00363	0.00365	0.00419	0.00478	0.00655	0.00653	0.00752	0.0047	0.00311	0.00371
Cr3+	0.39791	0.39809	0.41027	0.41202	0.40357	0.54067	0.89474	0.91569	0.90329	0.52213	0.35489	0.39173
Fe3+	0.04404	0.03329	0.02845	0.03003	0.03014	0.04313	0.09854	0.09708	0.08828	0.04518	0.0514	0.03769
Fe2+	0.27628	0.28898	0.28529	0.28792	0.30171	0.32917	0.32276	0.32501	0.3327	0.29589	0.25459	0.35638
Mn2+	0.00265	0.00322	0.00307	0.00339	0.00423	0.00465	0.00474	0.00643	0.00537	0.00275	0.00332	0.00388
Mg2+	0.72588	0.71176	0.71433	0.71403	0.69945	0.67233	0.67847	0.67524	0.66893	0.70587	0.74648	0.64875
Ca2+	0.00101	0.00215	0.00139	0.000613021	0.00132	0.00168	0.00187	0.00185	0.00142	0.00134	0.000723328	0.00312
Na1+	0	0.00105	0.000840387	0	0	0	0	0	0	0.000592287	0.000104716	0
100*Mg/(Mg+Fe2+)	72.4312	71.1238	71.4599	71.264	69.864	67.132	67.7632	67.5071	66.784	70.4631	74.5679	64.5439
100*Fe3+/(Cr+Al+Fe3+)	2.21477	1.67732	1.43015	1.51066	1.51731	2.1733	4.96613	4.8957	4.45127	2.27421	2.58372	1.90783
100*Fe2+/(Mg+Fe2+)	27.5688	28.8762	28.5401	28.736	30.136	32.868	32.2368	32.493	33.216	29.5369	25.4321	35.4561
100*Cr/(Cr+Al)	20.4652	20.401	20.9231	21.0425	20.6282	27.8525	47.4467	48.5559	47.6698	26.8951	18.3118	20.2128
Supplementary 1 Table 4. Continued
Spinel	E77R2W32-01	E77R2W32-02	E77R2W32-03	E77R2W32-04	E77R2W32-05	E77R2W32-06	E77R2W32-07	E77R2W32-08	E77R2W32-10	E77R2W32-11	E77R2W32-12	E77R2W32-13
Depth (mbsf)	1512.46	1512.46	1512.46	1512.46	1512.46	1512.46	1512.46	1512.46	1512.46	1512.46	1512.46	1512.46
SiO2	0.0867	0.104	0.0685	0.1071	0.0677	0.0858	0.1096	0.0267	0.073	0.0552	0.0948	0.4304
TiO2	0.2891	0.2657	0.261	0.2665	0.2788	0.2951	0.2795	0.338	0.8717	0.9185	0.9427	16.1823
Al2O3	24.342	25.5324	39.4006	38.6356	38.6326	28.9699	40.0593	24.2763	22.443	22.9702	22.9427	2.9504
Cr2O3	40.1645	41.4749	26.736	27.9279	27.5857	37.3032	26.7227	39.0296	36.883	36.7367	36.4627	6.9338
FeO	25.1374	17.0133	15.6916	15.9544	15.8754	17.1051	15.7381	25.0099	31.6399	32.2661	33.0271	64.874
MnO	0.2271	0.1515	0.1319	0.1246	0.1198	0.1247	0.117	0.2087	0.276	0.294	0.28	1.2622
MgO	11.2684	15.396	17.7913	17.3674	17.8911	15.9336	18.0181	11.4449	7.54	7.1526	6.4722	0.6149
CaO	0.0523	0.0081	0.0605	0.043	0.0367	0.0451	0.0677	0.0233	0.0243	0.0268	0.0485	0.1659
Na2O	0.0158	ND	0.0111	ND	0.0029	0.0061	ND	ND	ND	ND	ND	0.0285
Total	101.583	99.9459	100.153	100.427	100.491	99.8686	101.112	100.357	99.7509	100.42	100.271	93.4424
Si4+	0.00263	0.0031	0.00191	0.00299	0.00189	0.00252	0.00302	0.000817903	0.00232	0.00175	0.00302	0.01655
Al3+	0.87075	0.89829	1.29378	1.27309	1.2682	1.00263	1.30125	0.87655	0.84153	0.85687	0.86091	0.13369
Ti4+	0.0066	0.00596	0.00547	0.0056	0.00584	0.00652	0.00579	0.00779	0.02085	0.02186	0.02257	0.46787
Cr3+	0.96375	0.9788	0.5889	0.6173	0.60744	0.86601	0.58227	0.94531	0.92769	0.91926	0.9178	0.21076
Fe3+	0.14797	0.10477	0.10317	0.09241	0.10906	0.11364	0.09885	0.16094	0.18443	0.17665	0.17011	0.68883
Fe2+	0.49005	0.31993	0.26242	0.2806	0.26071	0.3064	0.26388	0.4798	0.65735	0.67737	0.70923	1.39699
Mn2+	0.00584	0.00383	0.00311	0.00295	0.00283	0.0031	0.00273	0.00542	0.00744	0.00788	0.00755	0.0411
Mg2+	0.50978	0.68505	0.73884	0.72376	0.74278	0.69742	0.74021	0.52263	0.35756	0.33744	0.30715	0.03524
Ca2+	0.0017	0.00025906	0.00181	0.00129	0.0011	0.00142	0.002	0.000764787	0.0008283	0.00090882	0.00165	0.00683
Na1+	0.000929764	0	0.000599594	0	0.000156607	0.000347296	0	0	0	0	0	0.00212
100*Mg/(Mg+Fe2+)	50.987	68.1651	73.7912	72.0618	74.0195	69.4763	73.7198	52.1363	35.2306	33.2517	30.2201	2.46043
100*Fe3+/(Cr+Al+Fe3+)	7.46379	5.28642	5.19547	4.66079	5.49498	5.73265	4.98664	8.11665	9.44008	9.04615	8.72883	66.664
100*Fe2+/(Mg+Fe2+)	49.013	31.8349	26.2088	27.9382	25.9805	30.5237	26.2802	47.8637	64.7694	66.7483	69.7799	97.5396
100*Cr/(Cr+Al)	52.5348	52.1447	31.2798	32.6546	32.3858	46.3446	30.9139	51.8871	52.4349	51.7562	51.5992	61.1867
Supplementary 1 Table 4. Continued
Spinel	E77R2W32-14	E77R2W32-15	E77R2W32-16	E77R2W32-17	E77R2W32-18	E77R2W32-19	E77R2W32-20	E77R2W32-21	E78R3W21-01	E78R3W21-02	E78R3W21-03	E78R4W48-01
Depth (mbsf)	1512.46	1512.46	1512.46	1512.46	1512.46	1512.46	1512.46	1512.46	1518.43	1518.43	1518.43	1520.09
SiO2	0.3909	0.0539	0.0323	0.1177	0.0822	0.0867	0.114	0.1492	0.0697	0.1	0.0523	0.1285
TiO2	19.2735	0.3581	0.3506	0.945	0.2946	0.3114	18.2603	18.0903	0.3817	0.3585	0.3837	17.5179
Al2O3	2.0338	29.6102	30.2556	24.4012	33.8355	33.5596	2.4263	2.0151	31.457	31.7228	31.6543	2.4624
Cr2O3	1.1802	36.205	35.7779	33.4287	33.9267	33.777	0.0475	0.0257	31.4711	31.3327	31.399	0.0826
FeO	68.0243	18.9373	18.8538	32.0383	16.357	16.6087	69.8344	71.1539	19.2135	19.3161	19.2075	71.2104
MnO	1.5831	0.1578	0.1817	0.2392	0.1152	0.1115	1.2799	1.5033	0.127	0.1708	0.1489	2.276
MgO	0.2208	15.0998	15.1858	8.8282	16.8518	16.8527	0.738	0.0754	15.279	15.4089	14.9802	0.0326
CaO	0.3356	0.1033	0.094	0.1093	0.0867	0.0888	0.1031	0.0423	0.1475	0.1546	0.1044	0.0317
Na2O	0.0055	ND	0.0068	ND	ND	ND	ND	ND	ND	ND	ND	ND
Total	93.0477	100.525	100.739	100.108	101.55	101.396	92.8035	93.0552	98.1465	98.5644	97.9303	93.7421
Si4+	0.0152	0.00158	0.000941513	0.00367	0.00233	0.00246	0.00442	0.00581	0.00206	0.00294	0.00155	0.00495
Al3+	0.09322	1.02209	1.03952	0.89605	1.12872	1.12179	0.11079	0.09243	1.09668	1.10008	1.10703	0.11187
Ti4+	0.56366	0.00789	0.00769	0.02214	0.00627	0.00664	0.53199	0.52946	0.00849	0.00793	0.00856	0.50778
Cr3+	0.03629	0.8383	0.82457	0.82343	0.75917	0.75736	0.00145	0.000790773	0.73597	0.72885	0.7366	0.00252
Fe3+	0.71318	0.12068	0.11904	0.22891	0.09492	0.10264	0.81496	0.83625	0.14624	0.14932	0.13614	0.86015
Fe2+	1.4991	0.34313	0.34058	0.60585	0.29224	0.29128	1.44751	1.47957	0.32903	0.32595	0.34048	1.43525
Mn2+	0.05215	0.00391	0.00449	0.00631	0.00276	0.00268	0.042	0.04955	0.00318	0.00426	0.00374	0.07431
Mg2+	0.0128	0.65918	0.65986	0.41	0.71096	0.71245	0.04262	0.00437	0.67367	0.67579	0.66257	0.00187
Ca2+	0.01398	0.00324	0.00294	0.00365	0.00263	0.0027	0.00428	0.00176	0.00467	0.00487	0.00332	0.00131
Na1+	0.000414711	0	0.000384338	0	0	0	0	0	0	0	0	0
100*Mg/(Mg+Fe2+)	0.84658	65.7662	65.9571	40.3599	70.869	70.9805	2.85996	0.29476	67.1855	67.4613	66.0556	0.13033
100*Fe3+/(Cr+Al+Fe3+)	84.6317	6.0916	6.00272	11.7487	4.78691	5.17923	87.8946	89.9702	7.39014	7.54817	6.87654	88.2627
100*Fe2+/(Mg+Fe2+)	99.1534	34.2338	34.0429	59.6401	29.131	29.0195	97.14	99.7052	32.8145	32.5386	33.9444	99.8697
100*Cr/(Cr+Al)	28.019	45.0606	44.2345	47.8883	40.2127	40.3033	1.29619	0.84825	40.1588	39.8511	39.9536	2.20061
Supplementary 1 Table 4. Continued
Spinel	E78R4W48-02	E78R4W48-03	E78R4W48-04	E78R4W48-05	E78R4W48-06	E78R4W48-07	E78R4W48-08	E78R4W48-09	E78R4W48-10	E78R4W48-11	E78R4W48-12	E78R4W48-13
Depth (mbsf)	1520.09	1520.09	1520.09	1520.09	1520.09	1520.09	1520.09	1520.09	1520.09	1520.09	1520.09	1520.09
SiO2	0.1422	0.5207	0.0969	0.0809	0.0786	0.0548	0.1058	0.0721	0.0978	0.1351	0.1628	0.115
TiO2	17.0114	17.2216	18.1929	17.006	1.1393	0.8524	20.1286	1.4029	17.6011	17.8672	17.0658	19.7673
Al2O3	2.395	2.1366	1.8034	2.2629	19.0561	24.7026	1.4167	16.6576	1.8451	1.6365	2.7072	1.0549
Cr2O3	0.0637	0.0787	0.0402	0.057	31.3302	28.4707	0.0548	31.9016	0.0351	0.0403	0.0553	0.0446
FeO	72.0205	71.7138	72.0262	71.8746	38.5632	33.7218	70.3037	39.5363	72.3474	72.4035	71.4121	70.5931
MnO	2.1873	2.3026	2.3728	2.2143	0.3088	0.2629	2.6322	0.3011	2.2973	2.3379	2.1454	2.6329
MgO	0	0.1641	0.0512	0.006	6.511	9.4646	0	6.4232	0.0111	0	0.116	0.0144
CaO	0.0231	0.0295	0.0012	0.0812	0.1719	0.2086	0.0501	0.1796	0.042	0.0231	0.0473	0.0582
Na2O	ND	ND	ND	ND	0.0165	0.0075	ND	ND	ND	0.0067	ND	ND
Total	93.8432	94.1676	94.5848	93.5829	97.1756	97.7459	94.6919	96.4744	94.2769	94.4503	93.7119	94.2804
Si4+	0.00547	0.01996	0.00371	0.00312	0.0026	0.00173	0.00407	0.00243	0.00376	0.00519	0.00626	0.00445
Al3+	0.10869	0.09655	0.08148	0.10303	0.74373	0.91856	0.06419	0.66129	0.08359	0.07409	0.12273	0.04806
Ti4+	0.49257	0.49652	0.52448	0.49403	0.02837	0.02022	0.58195	0.03554	0.50879	0.51613	0.49366	0.57463
Cr3+	0.00194	0.00239	0.00122	0.00174	0.82022	0.71015	0.00167	0.84953	0.00107	0.00122	0.00168	0.00136
Fe3+	0.89327	0.86811	0.86091	0.90092	0.37517	0.32785	0.7621	0.41325	0.89024	0.88255	0.87574	0.79242
Fe2+	1.42576	1.43112	1.44818	1.421	0.69272	0.56186	1.49824	0.7004	1.43539	1.44331	1.42142	1.48963
Mn2+	0.07133	0.07477	0.07705	0.07245	0.00866	0.00703	0.08571	0.00859	0.07479	0.07606	0.0699	0.08621
Mg2+	0	0.00938	0.00293	0.000345491	0.32138	0.4451	0	0.32249	0.000635997	0	0.00665	0.000829735
Ca2+	0.000952977	0.00121	4.92889e-05	0.00336	0.0061	0.00705	0.00206	0.00648	0.00173	0.000950721	0.00195	0.00241
Na1+	0	0	0	0	0.00106	0.000458779	0	0	0	0.000499002	0	0
100*Mg/(Mg+Fe2+)	0	0.65101	0.20162	0.02431	31.691	44.202	0	31.5275	0.04429	0	0.46574	0.05567
100*Fe3+/(Cr+Al+Fe3+)	88.9802	89.7698	91.2356	89.5822	19.3475	16.7564	92.0454	21.4779	91.3162	92.1372	87.5603	94.129
100*Fe2+/(Mg+Fe2+)	100	99.349	99.7984	99.9757	68.309	55.798	100	68.4725	99.9557	100	99.5343	99.9443
100*Cr/(Cr+Al)	1.75283	2.41122	1.47324	1.66157	52.4454	43.6019	2.52909	56.2297	1.25999	1.62502	1.3517	2.75781
Supplementary 1 Table 4. Continued
Spinel	E78R4W48-14	E78R4W48-15	E78R4W48-16	E78R4W48-17	E78R4W48-18	E78R4W48-19	E78R4W48-20	E78R4W48-21	E80R1W93-01	E80R1W93-03	E80R1W93-05	E80R1W93-06
Depth (mbsf)	1520.09	1520.09	1520.09	1520.09	1520.09	1520.09	1520.09	1520.09	1534.53	1534.53	1534.53	1534.53
SiO2	0.1471	0.1046	0.132	0.055	0.0822	0.1453	0.136	0.0285	0.1377	0.0765	0.0445	0.0461
TiO2	17.5078	17.2968	0.8142	0.9904	0.9019	17.072	18.1218	0.9411	17.1747	4.0499	1.2019	1.6507
Al2O3	1.611	1.8933	22.9056	21.3943	23.5393	1.2042	2.1165	22.2794	2.7748	9.9804	20.9519	19.1313
Cr2O3	0.0502	0.0966	29.125	30.9461	29.5631	0.0497	0.0661	30.3268	0.0344	26.7762	31.8691	30.6744
FeO	72.1187	71.9796	37.134	37.2447	35.8627	72.9756	71.0907	36.7039	70.7348	50.9699	37.1923	40.6021
MnO	2.2532	2.2345	0.2646	0.2907	0.2742	2.194	2.3729	0.2602	2.2318	0.3115	0.2892	0.272
MgO	0.0351	0	6.7896	6.8304	7.6814	0.0329	0.0142	6.9669	0.0203	4.1214	6.6555	5.5424
CaO	0.0279	0.0508	0.2033	0.2338	0.2111	0.0404	0.0353	0.2078	0.0833	0.0099	0.0326	0.0037
Na2O	0.003	ND	0.0281	0.0059	ND	ND	ND	ND	ND	ND	ND	ND
Total	93.754	93.6562	97.3964	97.9913	98.1159	93.7141	93.9535	97.7146	93.1918	96.2957	98.237	97.9227
Si4+	0.00569	0.00405	0.00428	0.00179	0.00263	0.00563	0.00524	0.000924324	0.00533	0.0027	0.00145	0.00153
Al3+	0.07344	0.08631	0.87616	0.81942	0.88756	0.055	0.09615	0.8517	0.12657	0.41469	0.80401	0.74716
Ti4+	0.50927	0.50312	0.01987	0.0242	0.0217	0.49748	0.52529	0.02295	0.49987	0.10737	0.02943	0.04113
Cr3+	0.00154	0.00295	0.7473	0.79506	0.74772	0.00152	0.00201	0.77767	0.00105	0.7463	0.82034	0.80358
Fe3+	0.89533	0.89641	0.33	0.33391	0.31607	0.93726	0.84077	0.32288	0.86198	0.61887	0.3139	0.36395
Fe2+	1.43751	1.43185	0.67782	0.67825	0.64337	1.42753	1.45079	0.67268	1.42741	0.88381	0.69876	0.76115
Mn2+	0.07382	0.0732	0.00727	0.008	0.00743	0.07201	0.07747	0.00715	0.07316	0.0093	0.00798	0.00763
Mg2+	0.00202	0	0.32845	0.33086	0.36629	0.0019	0.000815869	0.33683	0.00117	0.21658	0.323	0.27375
Ca2+	0.00116	0.00211	0.00707	0.00814	0.00724	0.00168	0.00146	0.00722	0.00345	0.000373945	0.00114	0.000131359
Na1+	0.00022499	0	0.00177	0.00037174	0	0	0	0	0	0	0	0
100*Mg/(Mg+Fe2+)	0.14058	0	32.6404	32.7873	36.2788	0.13294	0.0562	33.3655	0.08198	19.6818	31.6122	26.4518
100*Fe3+/(Cr+Al+Fe3+)	92.2726	90.9437	16.8933	17.1376	16.1976	94.3126	89.5448	16.5388	87.1033	34.7706	16.1949	19.0081
100*Fe2+/(Mg+Fe2+)	99.8594	100	67.3596	67.2127	63.7212	99.8671	99.9438	66.6345	99.918	80.3182	68.3878	73.5482
100*Cr/(Cr+Al)	2.04744	3.30924	46.0313	49.2456	45.7244	2.69392	2.05194	47.7283	0.82474	64.2812	50.5027	51.8193
Supplementary 1 Table 4. Continued
Spinel	E80R1W93-07	E80R1W93-08	E80R1W93-09	E80R1W93-10	E80R1W93-11	E80R1W93-12	E80R1W93-13	E80R1W93-14	E80R1W93-17	E80R1W93-18	E80R1W93-19	E80R1W93-20
Depth (mbsf)	1534.53	1534.53	1534.53	1534.53	1534.53	1534.53	1534.53	1534.53	1534.53	1534.53	1534.53	1534.53
SiO2	0.119	0.0883	0.0737	0.1027	0.0477	0.0884	0.0854	0.2437	0.2008	0.0386	0.0803	0.1182
TiO2	4.6807	19.7842	0.4363	0.3934	0.3932	0.3866	0.3694	1.7605	0.5846	0.4394	0.436	3.7324
Al2O3	12.3414	3.0609	32.9017	31.6413	32.0048	33.357	32.4475	20.0893	29.985	32.7405	33.492	9.5594
Cr2O3	29.9376	2.892	29.744	33.8932	34.2097	32.2777	31.3489	30.6471	30.6877	31.2644	29.9986	27.2774
FeO	46.7263	63.9642	20.8564	18.261	18.2256	18.9038	22.1052	38.0865	25.8809	22.2193	20.6825	50.0157
MnO	0.3009	3.1302	0.1701	0.1574	0.167	0.1624	0.1953	0.2767	0.1936	0.185	0.1841	0.2981
MgO	3.2638	0.1034	14.0562	14.7954	14.7937	14.5909	13.2852	7.7138	12.0924	13.1639	14.5188	4.4714
CaO	0.0223	0.0037	0.0119	ND	ND	0.0235	0.028	0.0555	0.1033	0.0183	ND	0.0257
Na2O	ND	ND	ND	ND	ND	ND	ND	ND	ND	ND	ND	ND
Total	97.392	93.0269	98.2503	99.2444	99.8417	99.7903	99.8649	98.8731	99.7283	100.069	99.3923	95.4983
Si4+	0.00415	0.00343	0.00218	0.00302	0.0014	0.00258	0.00251	0.00785	0.00601	0.00113	0.00235	0.00419
Al3+	0.50698	0.14026	1.14903	1.09743	1.10355	1.14584	1.12618	0.76283	1.05826	1.13435	1.15317	0.39987
Ti4+	0.12268	0.57845	0.00972	0.00871	0.00865	0.00847	0.00818	0.04265	0.01316	0.00971	0.00958	0.09962
Cr3+	0.82495	0.0889	0.69679	0.78854	0.79125	0.74375	0.72985	0.78062	0.7265	0.7266	0.69285	0.76538
Fe3+	0.4144	0.60707	0.13037	0.09057	0.08511	0.08831	0.12258	0.35554	0.17689	0.11736	0.13013	0.62713
Fe2+	0.94755	1.47266	0.38643	0.35882	0.36079	0.37243	0.42179	0.6706	0.47121	0.42886	0.37515	0.85732
Mn2+	0.00888	0.10308	0.00427	0.00392	0.00414	0.00401	0.00487	0.00755	0.00491	0.00461	0.00456	0.00896
Mg2+	0.16957	0.00599	0.62082	0.64899	0.64512	0.63388	0.58315	0.37044	0.53974	0.57681	0.63222	0.23655
Ca2+	0.000832767	0.000154131	0.000377792	0	0	0.000733831	0.000883438	0.00192	0.00331	0.000576372	0	0.000977265
Na1+	0	0	0	0	0	0	0	0	0	0	0	0
100*Mg/(Mg+Fe2+)	15.1789	0.40526	61.6351	64.3963	64.1332	62.9905	58.0284	35.5838	53.3895	57.3559	62.7598	21.6248
100*Fe3+/(Cr+Al+Fe3+)	23.7297	72.5961	6.59706	4.58238	4.29859	4.46506	6.19525	18.7228	9.01724	5.93222	6.58503	34.9887
100*Fe2+/(Mg+Fe2+)	84.8211	99.5947	38.3649	35.6037	35.8668	37.0095	41.9716	64.4162	46.6105	42.6441	37.2402	78.3752
100*Cr/(Cr+Al)	61.9365	38.7921	37.7494	41.8107	41.7589	39.3603	39.3233	50.5762	40.7059	39.0447	37.5321	65.6838
Supplementary 1 Table 4. Continued
Spinel	E80R1W93-21	E80R1W93-22	E80R1W93-23	E80R1W93-24	E80R1W93-25	E80R1W93-26	E80R1W93-27	E80R1W93-28	E80R1W93-29	E80R1W93-32	E80R1W93-33	E80R1W93-34
Depth (mbsf)	1534.53	1534.53	1534.53	1534.53	1534.53	1534.53	1534.53	1534.53	1534.53	1534.53	1534.53	1534.53
SiO2	0.0712	0.032	0.1052	0.1319	0.0784	0.1379	0.1618	0.0926	0.0245	0.0562	0.5779	0.4575
TiO2	3.7979	5.2916	16.4574	18.6707	0.2629	18.5974	0.9826	0.4019	0.4753	2.1676	2.9564	14.2882
Al2O3	9.7862	7.8498	3.0062	1.5219	29.3306	1.6247	22.0571	30.8041	29.4625	15.4239	13.3175	4.3637
Cr2O3	27.2794	24.2799	0.0696	0.03	33.8815	0.0349	31.7718	32.745	31.6982	30.1151	29.342	6.3486
FeO	50.6669	54.1647	69.6799	70.6671	20.4332	70.0011	32.2193	19.2011	27.55	44.3382	47.0256	66.8373
MnO	0.3013	0.2841	2.8641	2.7888	0.1913	2.8207	0.2929	0.1317	0.2384	0.282	0.2635	0.8099
MgO	4.076	3.5874	0	0.004	13.1445	0.0062	8.3823	14.7684	10.0329	4.6775	3.845	0.9262
CaO	0.0443	0.0701	0.2146	0.0204	0.0169	0.0142	0.0733	0.0321	0.0181	0.0116	0.0181	0.0748
Na2O	0.0058	0.0159	0.0048	0.0231	0.0047	0.0134	ND	ND	ND	ND	0.0238	0.0242
Total	96.029	95.5755	92.4018	93.8579	97.344	93.2505	95.9411	98.1769	99.4999	97.0721	97.3698	94.1304
Si4+	0.00252	0.00115	0.0041	0.0051	0.00239	0.00537	0.00529	0.00276	0.000747028	0.00192	0.01992	0.01727
Al3+	0.4081	0.33261	0.13802	0.06942	1.05285	0.07456	0.84974	1.08048	1.05887	0.6199	0.54099	0.1942
Ti4+	0.10105	0.14306	0.48209	0.54336	0.00602	0.54457	0.02415	0.00899	0.0109	0.05559	0.07663	0.40571
Cr3+	0.76309	0.69009	0.00214	0.000917868	0.81582	0.00107	0.82104	0.77044	0.76418	0.81189	0.79955	0.18952
Fe3+	0.62207	0.69	0.88783	0.83447	0.11478	0.8255	0.27033	0.12559	0.15366	0.4532	0.46796	0.77209
Fe2+	0.8771	0.9384	1.38201	1.45251	0.40564	1.45394	0.61036	0.35228	0.54887	0.81118	0.88746	1.33839
Mn2+	0.00903	0.00865	0.0945	0.09141	0.00493	0.09303	0.00811	0.00332	0.00616	0.00814	0.00769	0.0259
Mg2+	0.21497	0.19224	0	0.000230738	0.59673	0.000359855	0.4084	0.65513	0.45602	0.23775	0.19754	0.05213
Ca2+	0.00168	0.0027	0.00896	0.000845852	0.000551474	0.000592419	0.00257	0.00102	0.000591349	0.000423816	0.000668404	0.00303
Na1+	0.000397886	0.00111	0.000362521	0.00173	0.000277538	0.00101	0	0	0	0	0.00159	0.00177
100*Mg/(Mg+Fe2+)	19.6845	17.0025	0	0.01588	59.532	0.02474	40.088	65.0312	45.38	22.6663	18.2063	3.7489
100*Fe3+/(Cr+Al+Fe3+)	34.6893	40.2873	86.3656	92.2267	5.7871	91.6064	13.9268	6.35402	7.77354	24.0427	25.8757	66.8009
100*Fe2+/(Mg+Fe2+)	80.3155	82.9975	100	99.9841	40.468	99.9753	59.912	34.9688	54.62	77.3337	81.7937	96.2511
100*Cr/(Cr+Al)	65.155	67.4775	1.52927	1.30502	43.6578	1.42045	49.1412	41.6247	41.9176	56.7046	59.6437	49.3904
Supplementary 1 Table 4. Continued
Spinel	E80R1W93-35	E80R1W93-36	E80R1W93-37	E80R1W93-40	E80R1W93-41	E80R1W93-42	E80R1W93-43	E80R1W93-44	E80R1W93-45	E80R1W93-46	E80R1W93-48	E80R1W93-49
Depth (mbsf)	1534.53	1534.53	1534.53	1534.53	1534.53	1534.53	1534.53	1534.53	1534.53	1534.53	1534.53	1534.53
SiO2	0.1131	0.0562	0.0631	0.1149	0.0799	0.0541	0.0867	0.0787	0.3697	0.0791	0.0968	0.0873
TiO2	15.4095	17.5738	1.7736	4.1295	0.437	22.3351	18.4628	21.8966	17.2847	20.1449	12.9331	0.4436
Al2O3	3.6653	2.7573	19.5317	10.4581	30.0521	2.6198	3.649	2.7131	3.8578	2.6793	4.6115	29.5594
Cr2O3	5.0407	4.8531	29.5399	26.7583	32.3763	2.5085	6.3698	3.1978	8.3438	0.031	11.3298	31.9049
FeO	67.1744	66.8182	39.5933	48.9618	26.5222	62.4586	62.3071	62.962	61.1432	67.8045	63.0004	25.999
MnO	0.9358	1.6175	0.2682	0.2952	0.2748	3.9115	3.3377	3.5614	3.0126	2.8254	1.2176	0.2188
MgO	0.6985	0.0804	6.6497	4.7732	9.1273	0.0246	0.0202	0.0058	0.1548	0.0007	1.0027	10.8981
CaO	0.0999	0.0546	0.0371	0.1501	ND	0.0068	0.009	0.0023	0.0474	0.0014	0.0312	0.0231
Na2O	ND	ND	0.0131	0.0157	ND	ND	ND	ND	ND	ND	ND	ND
Total	93.1372	93.8111	97.4697	95.6568	98.8696	93.919	94.2423	94.4177	94.214	93.5663	94.2231	99.1342
Si4+	0.00434	0.00217	0.00208	0.00405	0.00246	0.00209	0.00332	0.00303	0.01413	0.00306	0.00365	0.00265
Al3+	0.16589	0.12534	0.75819	0.434	1.09048	0.11951	0.16482	0.12306	0.17382	0.12223	0.20521	1.05915
Ti4+	0.445	0.5097	0.04393	0.10934	0.01012	0.65009	0.5321	0.63372	0.4969	0.58635	0.3672	0.01014
Cr3+	0.15304	0.14798	0.76919	0.74488	0.78806	0.07676	0.193	0.0973	0.25218	0.000948613	0.33819	0.76684
Fe3+	0.7824	0.70294	0.38144	0.59542	0.09631	0.49936	0.57133	0.50614	0.55195	0.698	0.7149	0.14843
Fe2+	1.37481	1.45215	0.70908	0.84626	0.58655	1.52226	1.42556	1.52023	1.40272	1.49669	1.27423	0.51256
Mn2+	0.03044	0.05284	0.00748	0.0088	0.00717	0.12823	0.10834	0.11609	0.09754	0.09263	0.03894	0.00563
Mg2+	0.03998	0.00462	0.32646	0.25052	0.41886	0.00142	0.00115	0.000332723	0.00882	4.03856e-05	0.05643	0.49385
Ca2+	0.00411	0.00226	0.00131	0.00566	0	0.00028199	0.000369554	9.4839e-05	0.00194	5.80579e-05	0.00126	0.000752426
Na1+	0	0	0.000836545	0.00107	0	0	0	0	0	0	0	0
100*Mg/(Mg+Fe2+)	2.82602	0.31728	31.5254	22.8411	41.661	0.09315	0.08088	0.02188	0.62491	0.0027	4.24071	49.0708
100*Fe3+/(Cr+Al+Fe3+)	71.0415	72.0035	19.9829	33.558	4.87659	71.7854	61.4895	69.668	56.4398	85.0002	56.8152	7.51749
100*Fe2+/(Mg+Fe2+)	97.174	99.6827	68.4746	77.1589	58.339	99.9069	99.9191	99.9781	99.3751	99.9973	95.7593	50.9292
100*Cr/(Cr+Al)	47.9845	54.1421	50.3601	63.1852	41.9505	39.1095	53.9372	44.1536	59.1972	0.77014	62.2361	41.9959
Supplementary 1 Table 4. Continued
Spinel	E80R1W93-50	E80R1W93-51	E80R1W93-53	E86R1W29-01	E86R1W29-02	E86R1W29-03	E86R2W16-01	E86R2W16-02	E87R1W86-02	E87R1W86-03	E88R1W106-01	E88R1W106-02
Depth (mbsf)	1534.53	1534.53	1534.53	1585.19	1585.19	1585.19	1586.42	1586.42	1594.86	1594.86	1604.16	1604.16
SiO2	0.0603	0.1674	0.0212	0.073	0.098	0.068	0.067	0.312	0.0957	0.5564	0.1104	0.0379
TiO2	0.4352	0.6029	19.0263	0.317	0.289	0.302	0.615	14.459	0.3272	0.4341	0.2323	0.2129
Al2O3	30.9934	27.9059	3.0414	25.667	25.451	25.415	25.078	2.926	27.7972	24.8626	23.679	25.6558
Cr2O3	32.0838	30.7734	8.6739	39.522	38.409	39.667	38.432	0.05	37.0063	38.5967	45.0178	42.5359
FeO	23.229	25.1058	61.3981	18.301	18.676	18.689	21.639	72.029	20.0937	22.1136	15.9041	15.9656
MnO	0.211	0.196	1.7916	0.212	0.146	0.225	0.275	1.579	0.1575	0.2048	0.1461	0.1422
MgO	12.1426	11.9584	0.2335	15.017	14.903	15.053	14.336	0.074	14.1639	12.4373	15.3159	15.5351
CaO	0.02	0.0603	0.0132	0.102	0.127	0.148	0.056	0.301	0.1046	0.1938	0.0237	0.0271
Na2O	0.0109	ND	ND	ND	ND	0.019	0.024	0.017	ND	0.0708	ND	ND
Total	99.1862	96.7701	94.1992	99.211	98.099	99.586	100.522	91.747	99.7461	99.4701	100.429	100.112
Si4+	0.00181	0.00518	0.000815366	0.00219	0.00298	0.00204	0.002	0.0122	0.00286	0.01699	0.00331	0.00113
Al3+	1.09556	1.01837	0.13788	0.90949	0.91111	0.89807	0.88428	0.13487	0.97775	0.89475	0.83672	0.90064
Ti4+	0.00982	0.01404	0.55033	0.00717	0.0066	0.00681	0.01384	0.42523	0.00734	0.00997	0.00524	0.00477
Cr3+	0.76075	0.7533	0.26377	0.93939	0.92233	0.94023	0.90903	0.00155	0.87315	0.93173	1.06706	1.00163
Fe3+	0.12108	0.18989	0.49606	0.1324	0.14741	0.14511	0.1764	0.99002	0.1287	0.12379	0.07913	0.08594
Fe2+	0.46152	0.46017	1.47885	0.32772	0.32696	0.32346	0.36498	1.36562	0.37279	0.44087	0.31962	0.31174
Mn2+	0.00536	0.00514	0.05837	0.0054	0.00376	0.00571	0.00697	0.0523	0.00398	0.0053	0.00371	0.00359
Mg2+	0.54283	0.55191	0.01339	0.67296	0.67472	0.67271	0.63931	0.00431	0.63008	0.56607	0.68446	0.68971
Ca2+	0.000642672	0.002	0.000543982	0.00329	0.00413	0.00475	0.0018	0.01261	0.00334	0.00634	0.000761302	0.000864822
Na1+	0.000633829	0	0	0	0	0.0011	0.00139	0.00129	0	0.00419	0	0
100*Mg/(Mg+Fe2+)	54.048	54.5322	0.89713	67.2507	67.3586	67.5297	63.6578	0.31488	62.8278	56.2169	68.1679	68.8715
100*Fe3+/(Cr+Al+Fe3+)	6.12323	9.68061	55.2586	6.68267	7.4418	7.31636	8.95585	87.8899	6.50119	6.3475	3.9906	4.32227
100*Fe2+/(Mg+Fe2+)	45.952	45.4678	99.1029	32.7493	32.6414	32.4703	36.3422	99.6851	37.1722	43.7831	31.8321	31.1285
100*Cr/(Cr+Al)	40.9817	42.5194	65.6718	50.8087	50.3059	51.1468	50.6899	1.13327	47.1743	51.0124	56.0495	52.6545
wt. % for major elements. Cation abundances are calculated based on stoichiometry with 4 oxygen anions.
