# Supplementary material for: Basalt derived from highly refractory mantle sources during early Izu-Bonin-Mariana arc development
Source: Research Square preprint supplement (doi:10.21203/rs.3.rs-89845/v1), 2020-10-12
Supplement: Supplementary file 9 [file a2521dfb20b2fc097c0275d1.xlsx]

## Sheet: Sheet1
Supplementary 2 Table 1. Summary of replicate analyses of trace element of reference standard BCR-2G compared to the GeoReM preferred values for each element. See http://georem.mpch-mainz.gwdg.de/ for recommended values for the standard.
BCR-2G	GeoRem	GIG (n=56)			RSES (n=54)
	(ppm)	Average	St.Dev.	RSD	Average	St.Dev.	RSD
Rb	47	47.76	0.95	2	49.36	1.42	2.87
Sr	342	331.8	4.86	1.46	338.46	4.61	1.36
Y	35	32.73	0.55	1.68	32.87	1.16	3.53
Zr	184	176	2.26	1.29	179	5.79	3.23
Nb	12.5	12.2	0.3	2.45	12.45	0.17	1.36
Ba	683	670.27	13.44	2.01	682.09	8.47	1.24
La	24.7	24.01	0.35	1.44	24.42	0.48	1.95
Ce	53.3	51.01	0.83	1.62	52.82	0.99	1.88
Pr	6.7	6.3	0.16	2.5	6.49	0.18	2.72
Nd	28.9	27.51	0.88	3.2	28.37	0.76	2.7
Sm	6.59	6.47	0.32	5.02	6.43	0.19	2.98
Eu	1.97	1.85	0.08	4.46	1.88	0.06	3.15
Gd	6.71	6.38	0.31	4.93	6.26	0.17	2.72
Tb	1.02	0.95	0.04	4.43	0.93	0.03	3.29
Dy	6.44	6.2	0.23	3.77	6.14	0.16	2.66
Ho	1.27	1.26	0.05	3.72	1.22	0.04	3.23
Er	3.7	3.58	0.17	4.74	3.46	0.11	3.09
Tm	0.51	0.51	0.03	6.42	0.49	0.02	4.62
Yb	3.39	3.35	0.22	6.55	3.22	0.11	3.42
Lu	0.503	0.5	0.03	6.83	0.47	0.02	3.86
Hf	4.84	4.64	0.18	3.84	4.47	0.13	2.96
Ta	0.78	0.76	0.04	5.62	0.77	0.02	2.79
Pb	11	10.78	0.31	2.84	11.11	0.31	2.81
Th	5.9	5.85	0.16	2.66	5.74	0.11	1.83
U	1.69	1.69	0.05	3.1	1.74	0.05	2.7
St.Dev.: standard deviation. RSD: relative standard deviation
GIG: Guangzhou Institute of Geochemistry, Chinese Academy of Sciences
RSES: Research School of Earth Sciences in Australian National University
